# Supplementary material for: Elevated estradiol levels on hCG trigger day adversely effects on the clinical pregnancy rates of blastocyst embryo transfer but not cleavage-stage embryo transfer in fresh cycles: a retrospective cohort study
Source: PeerJ. 2023 Jul 18;11:e15709. doi: 10.7717/peerj.15709 (PMC10361074; doi:10.7717/peerj.15709)
Supplement: Supplemental Information 1 [file peerj-11-15709-s001.xlsx]

## Sheet: Sheet1
No.	Date of oocyte retrieval	previous cycle	female age (year)	COH protocol	BMI	Sterility classification	infertility indication	Duration of infertility	Fertilization type	AMH	basal FSH	basal LH	basal E2	hcg day FSH	E2 set(set 1 (E2 ≤ 2000 pg/ml), set 2 (E2 = 2001-3000 pg/ml), set 3 (E2 = 3001-4000 pg/ml), and set 4 (E2 > 4000 pg/ml))	hcg day E2	hcg day LH	hcg day P	endometrial thickness	No. of retrieved oocytes	No. of inviable embryos	date of embryo transfer	No. of embryos transferred	No. of high-quality embryos transferred	OHSS(0-No; 1-Yes)	clinical pregnancy(0-No; 1-Yes)	Pregnancy classification	Miscarriage	data of childbirth	Gestational age	delivery method	baby 1 gender	baby 1 birth weight	baby 2 gender	baby 2 birth weight
1	2020-05-04 08:35:59	0	41	GnRH-antagonist	24.65	primary	Mixed	10	IVF	1.246	6.79	12.1	51.5	18.46	1	1891	13.33	0.379	8.5	10	6	2020-05-07 11:35:52	2	2	0	1	intrauterine pregnancy		2021-01-08	37	Cesarean	male	2.8
2	2020-05-06 09:25:42	0	33	GnRH-antagonist	22.64	primary	tubal	7	ICSI	3.349	7.63	5.43	20.84	11.48	1	1385	2.07	0.222	13.1	10	6	2020-05-09 11:20:02	2	2	0	1	intrauterine pregnancy		2021-01-29	40	vaginal	female	2.6
3	2020-05-07 09:06:29	0	33	GnRH-antagonist	18.59	primary	tubal	4	ICSI	6.21	4.86	6.11	45.84	9.57	2	2261	1.92	0.509	12.9	11	5	2020-05-10 11:34:04	2	1	0	1	intrauterine pregnancy		2021-01-07	37	Cesarean	female	2.2	female	2.845
4	2020-05-07 09:50:09	0	33	GnRH-antagonist	25.56	primary	Unexplained	2	IVF	4.306	5.41	2.69	31.12	10.08	1	1870	8.85	0.787	10.9	8	4	2020-05-10 11:28:32	2	2	0	1	intrauterine pregnancy		2020-12-28	35	Cesarean	female	2.1
5	2020-05-09 09:45:51	0	27	GnRH-antagonist	25.08	secondary	tubal	2	IVF	5.324	8.54	3.82	46.97	10.11	1	1730	3.04	0.446	10.4	15	11	2020-05-12 10:40:14	2	2	0	0
6	2020-05-13 09:00:02	0	32	GnRH-antagonist	NA	secondary	tubal	5	IVF	4.85	7.15	3.42	54.38	13.31	1	1050	1.66	0.733	11.9	6	3	2020-05-16 11:40:52	2	1	0	1	ectopic pregnancy
7	2020-05-18 10:00:18	1-2	37	GnRH-antagonist	24.91	primary	Mixed	1	ICSI	5.35	5.26	5.74	58	9.66	2	2744	4.37	0.774	8.2	13	8	2020-05-21 11:28:04	2	2	0	1	intrauterine pregnancy		2021-02-04	39	Cesarean	female	3.35
8	2020-05-18 10:15:33	0	29	GnRH-antagonist	24.22	primary	male	3	ICSI	4.4	6.6	4.75	57.28	11.59	3	3816	1.75	0.738	8.3	15	3	2020-05-21 11:35:43	2	2	0	0
9	2020-05-21 08:55:51	0	32	GnRH-antagonist	19.1	primary	male	3	ICSI	2.78	8.24	6.12	56.58	11.29	1	1358	2.83	0.439	11.8	10	7	2020-05-24 09:48:39	1	1	0	0
10	2020-05-22 08:30:16	0	35	GnRH-antagonist	19.15	secondary	tubal	3	IVF	0.5	9.28	6.3	50.45	21.1	1	771.9	4.15	0.379	8.6	3	1	2020-05-25 11:30:41	1	1	0	0
11	2020-05-22 08:55:47	0	45	GnRH-antagonist	23.56	secondary	tubal	10	IVF	2.06	4.8	5.68	23	23.54	1	789	5.15	0.423	7.1	1	1	2020-05-25 11:00:31	1	1	0	0
12	2020-05-22 09:10:59	0	43	GnRH-antagonist	25.39	secondary	Ovulatory	6	IVF	1.08	12.69	6.63	40.22	12.5	1	636	2.2	0.126	11.8	4	2	2020-05-25 11:25:13	2	2	0	1	intrauterine pregnancy	yes
13	2020-05-23 09:35:23	0	41	GnRH-antagonist	21.6	secondary	tubal	4	IVF	2.86	10.39	6.86	57.72	15.72	1	1280	4.13	0.362	14.1	5	3	2020-05-26 10:25:33	1	1	0	0
14	2020-05-26 09:05:31	0	31	GnRH-antagonist	23.4	secondary	Mixed	3	IVF	1.77	2.15	1.65	60.2	15.81	2	2753	2.73	0.972	12.3	5	2	2020-05-29 11:00:42	2	1	0	1	intrauterine pregnancy		2021-02-09	39	Cesarean	male	3.1
15	2020-05-28 09:00:35	0	31	GnRH-antagonist	24.97	primary	tubal	3	IVF	4.2	7.51	5.21	22.61	18.46	1	1322	1.89	0.238	10.4	9	5	2020-05-31 11:45:02	2	2	0	0
16	2020-05-28 09:30:14	0	39	GnRH-antagonist	21.26	secondary	tubal	5	IVF	2.4	7.46	8.89	45.43	11.83	2	2158	2.72	0.755	7.9	9	3	2020-05-31 11:40:08	2	2	0	1	intrauterine pregnancy		2021-02-12	39	vaginal	male	3.7
17	2020-05-29 08:40:57	0	32	GnRH-antagonist	19.27	primary	tubal	4	IVF	3.34	7.38	4.45	29.42	11.45	1	1988	6.54	0.605	9.9	8	3	2020-06-01 12:05:50	1	1	0	0
18	2020-05-29 09:30:55	1-2	29	GnRH-antagonist	26.67	primary	male	5	ICSI	7.8	7.62	11.37	34.74	10.24	1	1646	1.19	0.181	14.3	20	5	2020-06-01 11:46:20	2	2	0	1	intrauterine pregnancy		2020-12-24	31	vaginal	male	1.75	female	1.75
19	2020-05-31 08:45:12	≥3	45	GnRH-antagonist	22.1	secondary	tubal	4	IVF	0.86	5.9	15.63	44.42	15.72	1	730.5	3.73	0.258	9.9	6	3	2020-06-03 11:00:04	1	1	0	0
20	2020-05-31 09:32:10	1-2	30	GnRH-antagonist	18.07	primary	DOR	4	ICSI	NA	8.05	6.64	67.03	18.13	1	705.2	13.56	0.753	7.4	5	3	2020-06-03 10:43:17	2	2	0	0
21	2020-06-02 09:05:59	1-2	26	GnRH-antagonist	20.5	primary	tubal	2	IVF	NA	13.85	5.43	44.58	14.65	1	1224	2.38	0.388	14.4	4	4	2020-06-05 11:30:59	2	2	0	1	ectopic pregnancy
22	2020-06-03 09:00:45	0	36	GnRH-antagonist	24.65	secondary	tubal	3	IVF	0.876	7.78	6.42	44.49	14.18	1	612.2	1.22	0.214	9.8	4	3	2020-06-06 11:42:30	1	1	0	0
23	2020-06-03 09:45:19	0	30	GnRH-antagonist	24.03	primary	tubal	5	ICSI	1.37	7.9	5.43	37.3	13.5	1	1024	9.6	0.287	10.7	8	3	2020-06-06 11:53:00	1	1	0	0
24	2020-06-04 08:45:31	0	31	GnRH-antagonist	21.48	secondary	Mixed	8	ICSI	0.441	7.16	7.36	26.56	23.41	1	823.6	1.23	0.75	9.3	5	4	2020-06-07 11:00:11	2	1	0	0
25	2020-06-04 10:35:36	≥3	30	GnRH-antagonist	19.1	secondary	tubal	1	IVF	7.349	9.19	7.42	7.01	15.31	2	2510	1.43	0.272	13.1	13	9	2020-06-07 11:40:33	2	1	0	0
26	2020-06-04 11:00:29	≥3	30	GnRH-antagonist	18.87	secondary	Endometriosis	3	IVF	NA	10.16	3.24	68.35	13.98	3	3318	2.92	0.609	9.4	11	2	2020-06-07 10:50:07	2	1	0	0
27	2020-06-05 09:19:28	0	32	GnRH-antagonist	19.29	primary	DOR	2	IVF	0.8	20.33	7.6	57.69	18.12	1	709.9	2.62	0.587	12.3	6	5	2020-06-08 10:25:44	2	2	0	1	intrauterine pregnancy		2021-02-21	39	vaginal	male	3
28	2020-06-05 09:20:16	0	37	GnRH-antagonist	19.03	primary	DOR	8	IVF	0.746	4.63	3.24	64.7	21.28	2	2863	3.1	1.13	11.3	4	4	2020-06-08 11:40:24	2	2	0	0
29	2020-06-05 09:45:29	1-2	31	GnRH-antagonist	17.35	primary	male	1	ICSI	4.89	9.06	7.07	49.4	22.68	1	1550	2.33	0.645	10.1	9	5	2020-06-08 10:23:23	1	1	0	1	intrauterine pregnancy		2021-02-23	39	Cesarean	male	3
30	2020-06-06 08:40:16	1-2	44	GnRH-antagonist	21.4	secondary	tubal	1	IVF	1.65	4.9	4.6	38	23.09	2	2562	2.06	0.792	10.1	8	6	2020-06-09 11:00:11	2	2	0	0
31	2020-06-07 09:30:02	0	32	GnRH-antagonist	26.57	secondary	tubal	1	IVF	3.22	5.98	4.33	29.16	10.76	3	3670	2.78	1.1	11.5	7	2	2020-06-10 10:56:33	2	1	0	1	intrauterine pregnancy		2021-02-17	38	Cesarean	male	3.15
32	2020-06-07 09:45:00	0	32	GnRH-antagonist	21.08	primary	tubal	3	IVF	2.74	6.31	4.36	39.77	17.04	3	3465	3.84	1	11.3	13	7	2020-06-10 11:03:35	2	2	0	0
33	2020-06-08 09:16:33	1-2	35	GnRH-antagonist	21.08	secondary	tubal	5	IVF	2.34	10.96	4.29	46	18.6	1	1103	1.1	0.441	13.7	6	5	2020-06-11 11:23:03	2	1	0	1	intrauterine pregnancy		2021-01-25	35	Cesarean	male	2	male	2
34	2020-06-11 08:35:50	0	41	GnRH-antagonist	24.54	secondary	tubal	1	ICSI	0.525	8.62	4.81	28.33	14.3	1	626	13.35	0.428	12.1	2	2	2020-06-14 10:55:53	2	2	0	0
35	2020-06-14 08:35:35	0	35	GnRH-antagonist	22.5	secondary	tubal	1	IVF	NA	10.8	6.57	47.6	21.7	1	1158	4.11	0.989	7.8	7	3	2020-06-17 11:35:27	2	1	0	1	intrauterine pregnancy		2021-03-02	39	Cesarean	female	3.65
36	2020-06-14 08:55:50	1-2	33	GnRH-antagonist	18.59	secondary	tubal	2	IVF	NA	10.29	3.11	29.64	18.56	3	3300	3.87	0.824	15.7	14	5	2020-06-17 11:15:11	2	2	0	1	intrauterine pregnancy		2021-02-25	38	vaginal	female	2.65
37	2020-06-15 09:16:25	0	28	GnRH-antagonist	21.36	secondary	tubal	1	IVF	2.24	6.73	4.9	52	11.2	2	2060	4.03	0.544	8.8	9	7	2020-06-18 11:23:42	2	2	0	1	intrauterine pregnancy		2021-01-27	34	Cesarean	male	2	female	1.85
38	2020-06-16 09:20:31	0	30	GnRH-antagonist	21.5	secondary	tubal	5	IVF	1.44	5.37	2	33.47	17.51	1	1971	1.79	1.3	9.6	7	3	2020-06-19 11:16:18	2	2	0	0
39	2020-06-16 10:20:47	0	29	GnRH-antagonist	24.61	secondary	tubal	0.5	IVF	5.45	6.41	6.36	37.12	11.33	3	3051	6.29	0.963	10	14	10	2020-06-19 10:30:02	2	2	0	1	intrauterine pregnancy		2021-03-05	39	Cesarean	male	3.75
40	2020-06-17 08:46:31	0	39	GnRH-antagonist	25.46	primary	DOR	9	IVF	0.48	10.63	1.58	44.53	11.69	1	1395	2.4	0.637	11.4	6	5	2020-06-20 10:45:48	2	2	0	1	intrauterine pregnancy		2021-02-19	37	Cesarean	male	2.7	female	2.8
41	2020-06-17 09:25:20	0	36	GnRH-antagonist	26.44	secondary	tubal	7	IVF	1.12	7.38	1.26	48.65	11.52	1	1419	2.32	0.629	11	3	3	2020-06-20 11:10:47	1	1	0	1	intrauterine pregnancy		2021-03-08	39	Cesarean	female	3.5
42	2020-06-18 08:45:37	0	35	GnRH-antagonist	26.95	primary	male	1	ICSI	2.21	9.36	7.32	39	12.5	1	1788	4.28	1.16	11.4	7	3	2020-06-21 10:40:56	2	1	0	0
43	2020-06-19 09:00:09	0	38	GnRH-antagonist	25.71	secondary	DOR	5	IVF	0.64	10.2	3.6	7.46	11.5	1	1297	4.8	1.14	11.1	4	3	2020-06-22 11:14:15	2	2	0	0
44	2020-06-22 08:35:07	0	44	GnRH-antagonist	20.28	secondary	DOR	2	IVF	1.9	10.78	6.89	38.17	21.69	1	1029	6.6	0.514	8.3	3	2	2020-06-25 10:43:07	2	1	0	0
45	2020-06-23 08:36:14	1-2	35	GnRH-antagonist	20.43	primary	tubal	5	IVF	2.345	5.02	5.18	62.6	16.36	1	1790	1.81	0.967	11.1	7	4	2020-06-26 10:32:19	2	1	0	1	intrauterine pregnancy		2021-02-25	37	Cesarean	male	2.5	male	2
46	2020-06-23 09:35:38	0	36	GnRH-antagonist	17.66	secondary	Unexplained	4	IVF	NA	12.14	6.93	69.13	18.27	2	2557	3.77	1.3	14.4	9	4	2020-06-26 10:45:39	2	2	0	0
47	2020-06-25 08:56:39	1-2	42	GnRH-antagonist	20.31	secondary	tubal	2	IVF	NA	6	3.1	34.9	13.27	1	1935	4.17	0.875	10.1	6	4	2020-06-28 10:55:32	2	2	0	0
48	2020-06-29 08:36:45	0	33	GnRH-antagonist	18.55	secondary	tubal	5	IVF	1.668	5.15	5.34	67.12	15.95	1	1668	7.31	0.503	10	7	2	2020-07-02 12:30:13	2	1	0	0
49	2020-07-04 09:10:06	0	29	GnRH-antagonist	18.31	secondary	tubal	2	IVF	NA	6.8	2.74	46.08	14.27	2	2044	2.5	0.703	8.4	5	4	2020-07-07 10:53:01	1	1	0	1	intrauterine pregnancy	yes
50	2020-07-05 08:30:27	0	31	GnRH-antagonist	17.58	primary	male	3	IVF	6.029	7.56	5.29	67.75	13.48	1	1708	1.94	0.408	9.8	7	6	2020-07-08 11:12:32	2	2	0	1	ectopic pregnancy
51	2020-07-09 08:40:07	0	27	GnRH-antagonist	20.8	primary	tubal	3	IVF	3.98	8.51	7.06	55.17	17.75	2	2708	5.16	0.472	12	9	6	2020-07-12 10:58:36	2	2	0	1	intrauterine pregnancy		2021-02-17	33	Cesarean	male	2.2	female	2
52	2020-07-09 09:20:07	0	30	GnRH-antagonist	29.33	secondary	tubal	2	IVF	4.38	5.14	6.72	25.41	6.97	2	2911	1.34	0.414	14.3	12	5	2020-07-12 11:03:35	2	2	0	1	intrauterine pregnancy		2021-03-17	37	vaginal	female	2.5
53	2020-07-10 09:03:24	0	32	GnRH-antagonist	16.38	secondary	tubal	1	IVF	0.839	9.9	4.75	72.29	19.21	1	1512	2.95	0.743	11.8	6	5	2020-07-13 10:26:45	2	2	0	1	intrauterine pregnancy		2021-03-23	38	vaginal	female	2.7
54	2020-07-10 09:10:39	0	28	GnRH-antagonist	23.5	primary	tubal	3	IVF	2.93	6.91	7.48	55.95	13.21	3	3452	1.36	0.85	12.7	12	6	2020-07-13 10:55:52	2	2	0	0
55	2020-07-11 08:46:26	0	30	GnRH-antagonist	21.36	primary	Unexplained	10	IVF	3.293	7.42	9.26	35.09	15.1	2	2221	2.3	0.649	10.3	10	7	2020-07-14 10:40:31	2	2	0	0
56	2020-07-12 08:45:42	1-2	29	GnRH-antagonist	17.93	primary	tubal	5	ICSI	NA	10.98	9.18	42.69	23.98	1	1023	6.68	0.733	12.5	6	2	2020-07-15 11:25:17	2	1	0	0
57	2020-07-12 09:20:23	0	24	GnRH-antagonist	18.83	primary	Endometriosis	2	IVF	1.16	7.98	3.53	39.34	16.72	2	2190	1.26	1.25	11	8	6	2020-07-15 11:30:49	1	1	0	0
58	2020-07-12 09:40:39	0	33	GnRH-antagonist	24.97	secondary	Ovulatory	5	IVF	6.05	5.66	3.03	24.88	9.84	1	1748	3.69	0.6	9.7	13	9	2020-07-15 11:16:48	2	2	0	1	intrauterine pregnancy		2021-03-06	35	Cesarean	female	2.35	female	1.85
59	2020-07-13 08:42:18	1-2	34	GnRH-antagonist	18.96	primary	Unexplained	3	IVF	0.916	6.01	3.66	36.17	18.11	1	1386	3.93	0.485	10.3	4	2	2020-07-16 11:09:56	2	2	0	0
60	2020-07-14 09:43:37	0	40	GnRH-antagonist	27.06	primary	tubal	12	IVF	0.59	9.9	2.85	28.11	18.09	1	1191	1.74	0.307	11.3	5	4	2020-07-17 11:02:51	2	1	0	0
61	2020-07-15 09:20:16	0	27	GnRH-antagonist	19.23	secondary	tubal	1	IVF	3.22	6.45	7.97	21.44	13.49	2	2095	5.08	0.633	10.6	12	6	2020-07-18 10:00:20	1	1	0	1	intrauterine pregnancy	yes
62	2020-07-16 09:10:04	0	39	GnRH-antagonist	22.19	secondary	tubal	5	IVF	0.877	7.85	7.23	66.47	19.16	2	2319	4.12	0.65	9	8	8	2020-07-19 11:04:27	2	2	0	1	intrauterine pregnancy		2021-03-16	36	Cesarean	male	2.85	female	2.55
63	2020-07-17 09:15:30	0	28	GnRH-antagonist	27.7	secondary	tubal	2	IVF	3.19	5.99	4.84	33.09	11.38	1	1718	3.88	0.474	14.3	7	3	2020-07-20 10:35:14	2	1	0	1	intrauterine pregnancy		2021-04-05	39	vaginal	male	3.65
64	2020-07-19 09:10:51	0	31	GnRH-antagonist	22.67	primary	tubal	4	IVF	4.83	7.38	5.97	27.61	12.71	2	2182	4.46	0.823	13.5	10	5	2020-07-22 10:46:12	1	1	0	1	intrauterine pregnancy		2021-04-14	40	Cesarean	female	3.3
65	2020-07-20 08:35:32	1-2	31	GnRH-antagonist	28.7	secondary	tubal	5	IVF	1.085	5.58	1.89	35.31	8.19	1	1480	1.59	0.387	10.9	9	4	2020-07-23 11:10:03	2	2	0	1	intrauterine pregnancy	yes
66	2020-07-20 09:06:38	0	41	GnRH-antagonist	19.63	secondary	tubal	10	IVF	1.442	9.76	7.58	52.41	34.45	1	1992	6.05	0.622	8.7	5	2	2020-07-23 11:36:38	2	2	0	0
67	2020-07-21 09:01:39	0	46	GnRH-antagonist	27.63	secondary	tubal	2	IVF	2.82	6.86	3.74	32.17	10.88	1	1234	7.13	0.693	12.5	10	5	2020-07-24 12:03:32	2	2	0	0
68	2020-07-21 09:18:36	0	33	GnRH-antagonist	21.28	secondary	tubal	1	IVF	2.45	6.49	5.1	33.46	17.73	2	2559	1.27	1.03	8.8	22	11	2020-07-24 11:58:45	2	2	0	1	intrauterine pregnancy		2021-04-18	40	Cesarean	male	3.5
69	2020-07-23 09:26:02	0	34	GnRH-antagonist	18.44	primary	Mixed	2	IVF	2.27	8.98	7.01	21	17.34	1	1697	3.03	0.594	13.2	11	3	2020-07-26 10:49:14	2	2	0	1	intrauterine pregnancy		2021-03-22	36	Cesarean	male	3.13	female	2.35
70	2020-07-24 10:40:14	1-2	24	GnRH-antagonist	20.32	secondary	tubal	2	IVF	4.143	5.98	8.16	57.7	11.12	1	1904	2.49	0.682	10.3	11	5	2020-07-27 11:18:55	2	1	0	1	intrauterine pregnancy		2021-03-23	36	Cesarean	male	2.7	male	2.1
71	2020-07-27 09:36:46	0	31	GnRH-antagonist	22.27	secondary	tubal	1	IVF	NA	6.4	5.2	20	14.11	2	2405	5.9	0.891	12.6	15	8	2020-07-30 11:40:22	1	1	0	1	intrauterine pregnancy		2021-04-10	38	vaginal	male	4.3
72	2020-07-28 09:10:46	0	27	GnRH-antagonist	18.82	primary	tubal	5	IVF	4.82	5.84	5.27	28.94	14.37	1	1548	3.72	0.487	9.5	6	2	2020-07-31 10:43:37	2	2	0	0
73	2020-07-29 08:55:41	0	29	GnRH-antagonist	18.36	primary	Unexplained	3	IVF	6.88	9.31	6.88	43.86	11.49	1	1632	1.48	0.438	10	6	5	2020-08-01 10:35:03	1	1	0	0
74	2020-07-30 09:05:22	0	26	GnRH-antagonist	23.23	secondary	tubal	5	IVF	9.09	8.22	14.25	51.74	8.85	1	1602	5.76	0.612	8.8	7	3	2020-08-02 11:26:27	2	2	0	1	intrauterine pregnancy	yes
75	2020-07-30 09:55:14	0	36	GnRH-antagonist	18.49	secondary	tubal	6	IVF	1.48	8.8	4.88	53.37	21.71	1	1961	1.71	1.29	9.2	10	8	2020-08-02 11:33:45	2	2	0	0
76	2020-07-30 10:00:19	0	34	GnRH-antagonist	16.8	primary	tubal	14	IVF	2.61	12.82	6.37	38.17	17.57	1	1548	5.2	0.63	8.9	9	5	2020-08-02 11:05:58	1	1	0	0
77	2020-08-01 08:50:09	0	39	GnRH-antagonist	19.31	secondary	tubal	3	ICSI	1.3	8.98	3.81	68.18	19.49	1	1749	2.57	0.733	6.3	6	4	2020-08-04 10:35:27	2	2	0	0
78	2020-08-01 09:05:44	0	32	GnRH-antagonist	28.13	primary	tubal	5	IVF	4.37	5.62	2.9	24.63	9.44	2	2629	8.46	0.447	11.1	7	5	2020-08-04 10:40:54	2	2	0	1	intrauterine pregnancy		2021-04-22	39	Cesarean	female	3.45
79	2020-08-02 08:35:38	0	38	GnRH-antagonist	29.84	primary	Unexplained	12	IVF	2.188	8.52	6.39	56.45	12.68	1	1206	2.39	0.267	10.8	3	1	2020-08-05 11:50:04	1	1	0	0
80	2020-08-02 09:05:41	0	33	GnRH-antagonist	20.7	primary	tubal	1	IVF	3.16	9.14	6.25	32.82	16.4	2	2356	2.12	0.717	11	7	4	2020-08-05 11:10:27	2	1	0	0
81	2020-08-02 09:10:57	0	28	GnRH-antagonist	24.98	primary	male	5	ICSI	1.72	6.17	5.94	53.84	24.88	1	1883	4.87	0.66	10.9	6	4	2020-08-05 10:55:06	2	2	0	0
82	2020-08-03 09:06:14	0	28	GnRH-antagonist	23.14	secondary	tubal	4	IVF	3.5	8.72	7	38.18	12.31	2	2201	3.19	0.552	12.1	13	8	2020-08-06 10:15:09	2	2	0	1	intrauterine pregnancy		2021-04-09	37	Cesarean	female	2.85
83	2020-08-04 08:55:19	0	28	GnRH-antagonist	20.55	secondary	tubal	1	IVF	3.36	5.53	2.85	29.91	15.63	1	1659	1.35	1.05	11.9	7	4	2020-08-07 10:30:11	2	2	0	0
84	2020-08-05 08:45:53	0	33	GnRH-antagonist	17.63	primary	male	4	IVF	4.28	6.68	8.18	35	15.22	2	2582	4.57	0.731	14.1	17	6	2020-08-08 10:32:28	2	2	0	1	intrauterine pregnancy		2021-04-20	38	Cesarean	male	3.45
85	2020-08-06 09:00:10	0	37	GnRH-antagonist	24.23	primary	tubal	2	IVF	2.1	9.74	6.07	31.63	13.23	1	1668	4.66	0.067	12.1	7	3	2020-08-09 11:25:25	2	2	0	1	intrauterine pregnancy		2021-04-17	38	Cesarean	female	4
86	2020-08-06 09:30:33	0	30	GnRH-antagonist	23.74	primary	Unexplained	3	IVF	3.45	7.16	3.97	43.22	10.16	1	1395	2.52	0.142	15.6	6	3	2020-08-09 10:45:20	2	2	0	0
87	2020-08-10 08:45:42	1-2	28	GnRH-antagonist	16.67	primary	male	1	ICSI	1.547	8.85	2.72	52.86	27.15	1	1694	1.09	0.511	8	10	4	2020-08-13 11:05:18	2	2	0	0
88	2020-08-12 09:25:40	0	22	GnRH-antagonist	20.83	primary	male	4	ICSI	1.99	7.48	4.23	33.51	10.62	2	2103	2.01	0.874	11.6	6	5	2020-08-15 11:10:04	2	2	0	1	intrauterine pregnancy		2021-04-09	36	Cesarean	female	2.85	female	2.45
89	2020-08-13 08:40:52	0	42	GnRH-antagonist	25.63	secondary	tubal	4	IVF	2.03	7.51	3.75	10.99	16.15	1	813	2.33	0.295	9.3	3	2	2020-08-16 11:06:57	2	2	0	1	intrauterine pregnancy	yes
90	2020-08-13 09:20:55	0	25	GnRH-antagonist	19.43	primary	DOR	3	IVF	1.08	8.49	2.59	65.94	16.4	1	1277	2.45	0.384	9.6	11	2	2020-08-16 11:15:20	2	1	0	0
91	2020-08-13 09:50:56	0	30	GnRH-antagonist	22.46	primary	tubal	3	IVF	4.36	9.47	4.42	31.26	14.11	2	2200	2.1	1.01	14	14	5	2020-08-16 10:55:47	2	2	1	1	intrauterine pregnancy	yes
92	2020-08-16 08:30:36	0	40	GnRH-antagonist	28.93	secondary	DOR	2	IVF	1.316	4	2.23	52.7	15.43	1	1001	4.56	0.691	12.2	5	4	2020-08-19 10:30:57	2	1	0	1	intrauterine pregnancy	yes
93	2020-08-19 09:15:16	0	44	GnRH-antagonist	23.07	secondary	tubal	12	IVF	1.88	5.04	3.15	44.17	21.43	3	3256	1.6	0.842	10.7	5	3	2020-08-22 11:32:13	2	2	0	0
94	2020-08-20 08:50:59	0	43	GnRH-antagonist	22.35	secondary	DOR	3	IVF	0.41	8.09	2.83	59.7	23.68	1	782.6	3.76	0.423	13	3	2	2020-08-23 11:30:55	2	2	0	0
95	2020-08-20 09:35:06	0	31	GnRH-antagonist	22.63	primary	tubal	5	IVF	NA	7.87	5.66	63.12	10.04	1	1861	1.44	0.784	10.3	10	6	2020-08-23 11:30:25	2	2	0	1	intrauterine pregnancy		2021-04-30	38	Cesarean	male	3.1	female	2.1
96	2020-08-21 08:45:09	1-2	33	GnRH-antagonist	19.53	primary	DOR	2	IVF	0.73	9.51	4.51	40.29	16.74	1	1235	3.85	0.407	13.7	10	5	2020-08-24 10:47:22	2	2	0	0
97	2020-08-21 08:50:32	0	29	GnRH-antagonist	19.49	primary	Unexplained	2	IVF	6.947	7.15	6.35	41.49	11.81	2	2988	2.44	0.859	12	18	8	2020-08-24 11:40:15	2	2	0	0
98	2020-08-21 09:10:41	0	32	GnRH-antagonist	18.37	secondary	tubal	3	IVF	1.49	4.9	4.72	30.51	19.49	2	2799	2.14	0.721	9.3	11	5	2020-08-24 12:10:07	1	1	0	0
99	2020-08-22 10:00:05	0	34	GnRH-antagonist	22.04	primary	male	10	ICSI	1.97	9.22	4.42	21.97	21.15	1	2000	2.68	0.511	12.9	10	7	2020-08-25 10:35:17	2	2	0	1	intrauterine pregnancy		2021-04-19	36	Cesarean	female	2.5	female	2.2
100	2020-08-22 10:10:56	0	33	GnRH-antagonist	23.44	secondary	tubal	3	IVF	NA	6.5	3.06	54	13.02	1	1914	0.942	1.41	11.6	12	11	2020-08-25 10:45:56	2	2	0	1	intrauterine pregnancy		2021-04-30	37	Cesarean	male	2.6	male	2.55
101	2020-08-23 09:50:39	1-2	28	GnRH-antagonist	17.97	primary	male	1	ICSI	1.09	9.21	2.43	27	14.48	2	2235	1.54	0.522	12.5	10	3	2020-08-26 11:26:57	2	2	0	0
102	2020-08-23 10:10:42	0	28	GnRH-antagonist	21.63	secondary	Unexplained	1	IVF	6.04	7.1	4.94	32	13.12	2	2375	11.21	0.641	10.7	7	4	2020-08-26 11:10:38	2	2	0	1	intrauterine pregnancy		2021-05-14	39	Cesarean	male	3.35
103	2020-08-24 09:15:22	1-2	39	GnRH-antagonist	21.87	secondary	male	1	ICSI	2.27	8.51	4.26	50.36	14.6	1	966.4	3.56	0.234	13.3	9	4	2020-08-27 10:01:18	2	2	0	0
104	2020-08-26 08:55:29	1-2	41	GnRH-antagonist	21.36	secondary	tubal	2	IVF	6.78	5.33	7.39	36.03	16.2	3	3561	4.46	0.855	12.7	15	10	2020-08-29 11:32:31	2	2	0	0
105	2020-08-28 08:30:43	0	33	GnRH-antagonist	22.48	secondary	tubal	3	IVF	0.637	11.17	5.79	52.37	15.61	1	862	21.75	0.57	8.7	2	2	2020-08-31 10:52:26	2	1	0	0
106	2020-08-28 09:10:51	0	37	GnRH-antagonist	17.99	secondary	male	2	ICSI	2.82	8.36	6.2	50.31	16.13	2	2463	2.49	0.83	10.6	8	4	2020-08-31 10:46:24	1	1	0	0
107	2020-08-28 09:30:18	0	35	GnRH-antagonist	17.19	secondary	tubal	4	IVF	2.84	6.67	7.74	54.33	12.25	1	1674	1.18	0.396	10.9	10	4	2020-08-31 10:40:50	2	1	0	1	intrauterine pregnancy	yes
108	2020-08-29 09:20:14	0	30	GnRH-antagonist	20.08	secondary	tubal	1	IVF	2.41	7.82	8.33	42.88	16.39	3	3981	2.24	1.04	11.5	13	4	2020-09-01 11:00:02	2	2	0	0
109	2020-08-29 10:00:34	0	33	GnRH-antagonist	22.6	secondary	male	7	ICSI	1.74	5.82	3.75	43.12	13	2	2991	2.1	0.804	7.5	13	4	2020-09-01 11:06:15	1	1	0	1	intrauterine pregnancy		2021-05-17	39	Cesarean	male	3.5
110	2020-08-30 09:00:05	1-2	32	GnRH-antagonist	22.06	primary	DOR	2	IVF	1.04	6.56	4.53	64.36	15.93	1	1113	2.04	0.5	9.9	4	3	2020-09-02 11:33:05	2	1	0	0
111	2020-08-30 09:50:58	0	36	GnRH-antagonist	20.55	primary	Unexplained	4	IVF	4.78	7.35	4.91	47.31	8.45	3	3336	4.55	0.582	11.2	7	4	2020-09-02 11:20:04	2	2	0	1	intrauterine pregnancy	yes
112	2020-09-02 08:45:53	0	38	GnRH-antagonist	21.56	primary	DOR	7	IVF	NA	6.57	1.79	55.43	16.44	1	927	9.06	0.684	11	4	2	2020-09-05 11:35:06	2	2	0	0
113	2020-09-02 09:05:52	0	33	GnRH-antagonist	20.7	secondary	tubal	1	IVF	NA	3.32	6.9	28	12.19	1	1793	5.1	0.642	12.6	7	7	2020-09-05 11:50:20	1	1	0	0
114	2020-09-02 10:00:21	0	38	GnRH-antagonist	21.5	secondary	male	11	ICSI	1.46	7.36	3.75	53.07	20.19	3	3084	3.48	0.883	8.2	11	4	2020-09-05 11:40:49	1	1	0	1	intrauterine pregnancy	yes
115	2020-09-03 09:00:42	0	29	GnRH-antagonist	19.63	secondary	Unexplained	2	IVF	5.03	7.06	9.05	24.21	15.52	1	1905	3.49	1.53	8.4	15	5	2020-09-06 10:40:02	2	2	0	1	intrauterine pregnancy		2021-05-12	37	vaginal	male	3.38
116	2020-09-04 09:00:44	0	34	GnRH-antagonist	16.94	secondary	tubal	7	IVF	4.49	6.45	7.44	44.42	11.83	1	1817	6.62	0.569	9	9	5	2020-09-07 11:30:22	1	1	0	1	intrauterine pregnancy	yes
117	2020-09-06 08:40:06	0	32	GnRH-antagonist	24.34	primary	male	2	ICSI	2.45	10.09	4.77	27.35	19.56	2	2022	0.849	0.507	15.1	19	9	2020-09-09 11:55:44	2	2	0	1	intrauterine pregnancy		2021-05-13	37	Cesarean	male	2.5	male	3
118	2020-09-06 09:00:13	0	39	GnRH-antagonist	18.03	secondary	tubal	4	IVF	4.15	7.75	6.76	67.53	21.31	3	3487	5.28	0.875	11.3	8	6	2020-09-09 10:50:03	2	2	0	0
119	2020-09-06 09:15:51	0	37	GnRH-antagonist	29.27	secondary	Unexplained	1	IVF	1.833	4.85	2.16	33.24	13.38	1	1756	3.86	0.554	10.2	11	6	2020-09-09 11:03:13	1	1	0	0
120	2020-09-06 09:45:32	0	34	GnRH-antagonist	26.35	primary	male	2	ICSI	7.02	6.58	6.27	44.66	11.63	3	3317	5.4	0.624	12.4	14	4	2020-09-09 11:26:52	2	2	0	1	intrauterine pregnancy		2021-05-25	39	Cesarean	female	4
121	2020-09-07 08:36:40	0	29	GnRH-antagonist	20.96	primary	Ovulatory	6	IVF	7.95	6.07	8.36	47.65	11.5	1	1978	7.09	0.469	12.5	16	8	2020-09-10 11:20:43	2	2	0	0
122	2020-09-10 09:20:27	0	32	GnRH-antagonist	20.51	primary	Mixed	6	IVF	2.094	6.97	2.84	45.58	15.43	1	1972	7.16	0.519	10.6	6	4	2020-09-13 11:02:50	2	2	0	1	intrauterine pregnancy		2021-05-28	39	Cesarean	female	3.05
123	2020-09-10 09:40:53	0	36	GnRH-antagonist	23.19	secondary	tubal	6	IVF	2.47	6.28	3.65	67.72	8.65	3	3430	4.1	0.622	9.9	11	6	2020-09-13 10:49:20	2	2	0	0
124	2020-09-11 08:49:02	0	46	GnRH-antagonist	21.57	secondary	tubal	2	IVF	0.534	10.36	7.1	62.98	19.13	1	1031	10.47	0.393	10.2	4	2	2020-09-14 11:45:23	1	1	0	0
125	2020-09-11 09:40:35	0	29	GnRH-antagonist	21.26	primary	tubal	2	IVF	0.409	11.91	7	56.69	15.16	1	1160	3.11	0.6	6.6	11	7	2020-09-14 11:55:52	2	2	0	0
126	2020-09-11 09:50:31	0	27	GnRH-antagonist	24.46	primary	tubal	1	IVF	12.89	4.59	5.86	40.25	6.97	3	3483	13.56	0.782	13.4	16	8	2020-09-14 11:50:42	1	1	0	0
127	2020-09-12 08:30:18	0	29	GnRH-antagonist	16.26	primary	Unexplained	5	IVF	0.98	9.14	7.16	74.64	18.49	1	1549	4.99	1.25	12.3	4	2	2020-09-15 10:40:40	2	1	0	0
128	2020-09-12 09:35:59	0	39	GnRH-antagonist	24.22	secondary	tubal	6	IVF	4.406	6.71	5.48	25.95	13.83	2	2571	3.73	0.844	10.3	8	5	2020-09-15 10:49:18	1	1	0	0
129	2020-09-14 08:36:34	0	27	GnRH-antagonist	21.3	secondary	tubal	2	IVF	1.98	6.75	2.89	27.76	16.02	1	1819	2.06	0.977	12.3	4	3	2020-09-17 11:40:36	2	2	0	1	intrauterine pregnancy		2021-05-20	37	Cesarean	male	2.6	male	2.7
130	2020-09-17 09:20:20	0	40	GnRH-antagonist	21.76	secondary	tubal	10	IVF	0.681	7.36	3.42	71.39	31.42	1	1122	5.81	0.353	9.8	3	2	2020-09-20 11:15:02	1	1	0	0
131	2020-09-17 10:20:12	1-2	30	GnRH-antagonist	18.21	primary	male	3	ICSI	1.958	5.15	4.09	26.73	9.04	3	3322	5.51	1.19	12.6	11	6	2020-09-20 11:20:58	2	2	0	1	intrauterine pregnancy	yes
132	2020-09-18 09:15:06	0	39	GnRH-antagonist	19.92	primary	male	5	ICSI	3.012	5.58	4.48	37.49	12.42	2	2415	2.58	1.06	12.9	9	5	2020-09-21 10:48:14	2	2	0	1	intrauterine pregnancy		2021-06-03	38	Cesarean	female	3.25
133	2020-09-20 08:40:26	0	39	GnRH-antagonist	21.37	secondary	male	7	ICSI	0.63	8.23	4.29	36.9	14.07	1	1219	3.62	0.363	8	6	4	2020-09-23 11:33:08	2	2	0	0
134	2020-09-20 10:25:00	0	38	GnRH-antagonist	18.99	secondary	Unexplained	2	IVF	5.26	5	5.35	77.67	17.67	3	3497	2.33	0.99	8.5	18	3	2020-09-23 11:20:35	2	1	0	1	intrauterine pregnancy		2021-05-28	37	Cesarean	female	3.775
135	2020-09-21 08:50:13	0	34	GnRH-antagonist	20.93	secondary	DOR	7	IVF	0.118	13.52	7.95	32.36	23.18	1	824.3	10.92	1.21	8.4	4	3	2020-09-24 10:50:18	2	1	0	1	intrauterine pregnancy		2021-06-09	39	vaginal	male	3
136	2020-09-21 08:56:02	0	31	GnRH-antagonist	18.29	primary	Unexplained	2	IVF	3.79	5.34	2.99	20.33	6.72	1	1434	2.21	1.09	9.7	11	3	2020-09-24 11:46:06	2	2	0	1	intrauterine pregnancy		2021-06-01	38	vaginal	male	3.05
137	2020-09-21 09:10:45	0	34	GnRH-antagonist	21.33	secondary	male	10	ICSI	1.45	10.93	6.06	47.25	17.76	2	2034	3.09	1.08	9.3	7	4	2020-09-24 11:43:15	1	1	0	0
138	2020-09-23 08:55:38	0	37	GnRH-antagonist	21.63	secondary	tubal	4	IVF	1.4	4.21	4.56	29.62	15.42	1	340.7	3.1	0.221	13.9	2	2	2020-09-26 10:24:07	2	2	0	1	intrauterine pregnancy	yes
139	2020-09-24 09:00:46	0	36	GnRH-antagonist	20.37	secondary	tubal	9	IVF	1.33	7.88	3.01	41	13.4	1	1429	5.58	0.766	12.1	5	5	2020-09-27 10:50:16	2	2	0	0
140	2020-09-26 09:46:10	0	27	GnRH-antagonist	17.89	primary	Ovulatory	7	IVF	18	6.6	20.32	69.58	6.02	2	2235	4.76	0.505	10.6	3	2	2020-09-29 10:56:49	2	2	0	1	intrauterine pregnancy		2021-05-29	37	Cesarean	male	2.9	female	2.2
141	2020-09-28 09:26:52	0	37	GnRH-antagonist	19.68	secondary	tubal	6	IVF	2.84	6.66	4.59	70.84	20.66	2	2693	4.85	0.983	11.4	7	4	2020-10-01 11:56:09	2	2	0	1	intrauterine pregnancy	yes
142	2020-09-28 09:46:21	0	33	GnRH-antagonist	19.95	primary	tubal	12	IVF	2.42	5.19	2.1	63.82	15.99	1	1872	1.63	0.243	11.6	7	3	2020-10-01 12:08:39	2	2	0	1	intrauterine pregnancy		2021-06-10	38	Cesarean	male	3	female	2.5
143	2020-09-30 09:05:39	0	29	GnRH-antagonist	21.48	primary	tubal	2	IVF	4.52	6.64	8.22	43.16	11.68	2	2589	4.76	1.27	9.3	7	7	2020-10-03 10:15:28	2	2	0	0
144	2020-10-01 09:08:06	0	28	GnRH-antagonist	21.23	primary	male	2	IVF	2.84	7.93	8.18	28.77	21.44	1	1435	4.47	0.557	11.2	7	6	2020-10-04 11:30:15	2	2	0	1	intrauterine pregnancy		2021-06-23	39	Cesarean	male	2.5
145	2020-10-01 09:20:15	0	36	GnRH-antagonist	20.96	secondary	tubal	1	IVF	1.003	5.53	3.86	51.9	24.71	1	1480	2.96	0.579	12.2	5	3	2020-10-04 11:15:31	2	2	0	1	intrauterine pregnancy		2021-06-24	40	vaginal	female	3
146	2020-10-04 08:50:40	0	35	GnRH-antagonist	20.51	secondary	tubal	1	IVF	1.84	7.39	4.4	36.14	15.31	3	3667	4.53	1.32	9.6	9	5	2020-10-07 11:30:44	2	2	0	1	intrauterine pregnancy		2021-06-21	39	Cesarean	male	4.15
147	2020-10-06 09:19:00	0	37	GnRH-antagonist	20.2	primary	Endometriosis	5	IVF	NA	8.53	6.36	57	24.81	1	1972	4.46	1.24	8.6	6	6	2020-10-09 11:15:03	2	2	0	0
148	2020-10-06 10:35:20	1-2	31	GnRH-antagonist	22.43	primary	Endometriosis	4	IVF	2.46	8.14	4.92	39.39	14.33	2	2163	1.4	0.846	11.9	10	6	2020-10-09 11:32:43	2	2	0	1	intrauterine pregnancy		2021-06-16	38	Cesarean	male	2.75	female	3.1
149	2020-10-07 08:31:00	0	35	GnRH-antagonist	23.88	primary	tubal	7	ICSI	2.39	6.89	2.97	27	22.79	2	2126	5.5	1.13	12.9	6	3	2020-10-10 10:15:05	1	1	0	1	intrauterine pregnancy		2021-06-29	39	Cesarean	male	3.58
150	2020-10-09 03:00:26	0	29	GnRH-antagonist	26.03	secondary	tubal	2	IVF	7.07	8.86	11.66	34.18	9.66	2	2172	4.67	0.451	10.6	6	5	2020-10-12 10:42:42	2	2	0	0
151	2020-10-10 09:35:10	0	27	GnRH-antagonist	24.24	primary	Unexplained	3	IVF	2.963	6.42	7.17	35.32	9.89	2	2566	6.24	0.512	13.6	7	3	2020-10-13 10:10:18	2	1	0	0
152	2020-10-13 09:25:48	0	35	GnRH-antagonist	20.2	primary	male	3	ICSI	5.29	7.23	5.93	62.77	11.94	3	3419	7.2	1.04	12.2	17	6	2020-10-16 10:30:47	2	2	0	1	intrauterine pregnancy	yes
153	2020-10-23 08:50:00	0	28	GnRH-antagonist	18.5	primary	tubal	1	IVF	6.3	8.92	6.58	44.44	10.42	1	1803	1.06	0.545	13.7	7	4	2020-10-26 10:45:43	1	1	0	0
154	2020-10-24 09:55:57	0	35	GnRH-antagonist	22.03	secondary	Unexplained	3	IVF	5.38	7.39	7.31	31.99	8.96	2	2545	7.11	0.672	10	5	5	2020-10-27 10:15:30	2	2	0	0
155	2020-10-26 09:35:53	1-2	38	GnRH-antagonist	29.84	primary	Unexplained	12	IVF	2.188	8.52	6.39	56.45	13.34	2	2150	3.39	0.168	13.6	14	8	2020-10-29 10:45:54	2	2	0	0
156	2020-10-27 09:26:44	0	30	GnRH-antagonist	19.65	primary	Mixed	1	ICSI	3.47	4.85	6.63	5	11.5	2	2093	5.57	0.317	13.3	9	3	2020-10-30 10:44:33	2	2	0	1	intrauterine pregnancy		2021-05-24	31	vaginal	male	1.65	female	1.7
157	2020-10-28 10:05:26	0	27	GnRH-antagonist	21.33	primary	tubal	2	IVF	9.43	6.19	7.05	33.81	8.31	2	2809	4.14	0.832	8.3	8	4	2020-10-31 11:05:17	2	2	0	1	intrauterine pregnancy		2021-07-11	38	vaginal	male	3.35
158	2020-10-29 09:45:15	0	33	GnRH-antagonist	22.1	secondary	tubal	3	IVF	3.06	5.36	5.62	61.17	9.33	2	2790	7.4	0.819	11.6	14	4	2020-11-01 11:16:43	1	1	0	0
159	2020-10-30 09:00:43	0	23	GnRH-antagonist	17.48	primary	tubal	1	IVF	4.24	7.11	7.37	53.52	13.6	4	4308	2.6	0.205	11.2	10	3	2020-11-02 11:55:26	1	1	0	0
160	2020-10-30 09:33:25	0	41	GnRH-antagonist	20.5	secondary	tubal	2	IVF	1.32	8.87	6.39	21.76	16.83	1	1941	2.96	1	10.7	6	5	2020-11-02 11:32:28	2	2	0	1	intrauterine pregnancy		2021-07-13	38	Cesarean	female	2.95
161	2020-10-30 09:40:03	0	29	GnRH-antagonist	21.48	primary	Unexplained	3	IVF	2.891	10.41	7.92	38.89	12.31	1	1209	3.09	0.392	14.3	5	3	2020-11-02 11:36:00	2	2	0	0
162	2020-10-30 10:10:13	0	29	GnRH-antagonist	24.35	secondary	Unexplained	1	IVF	2.553	6.12	2.52	44.6	9.63	1	1988	2.73	0.263	11.5	14	7	2020-11-02 10:45:34	2	2	0	1	intrauterine pregnancy		2021-07-05	37	Cesarean	male	3	female	2.35
163	2020-11-02 08:56:05	0	31	GnRH-antagonist	18.9	secondary	tubal	1	IVF	2.27	5.81	5.88	44.12	18.56	2	2188	1.53	0.991	8.6	9	4	2020-11-05 10:49:33	2	2	0	0
164	2020-11-03 08:40:49	0	37	GnRH-antagonist	NA	secondary	male	3	ICSI	1.27	8.49	3.8	51.82	13.92	1	1720	4.09	0.405	12.7	4	3	2020-11-06 10:40:02	2	1	0	1	intrauterine pregnancy	yes
165	2020-11-03 09:25:25	1-2	34	GnRH-antagonist	21.09	secondary	tubal	5	IVF	2.247	5.78	4.13	41.11	19	1	1762	2.7	0.776	13.3	10	6	2020-11-06 11:10:03	2	2	0	0
166	2020-11-04 09:20:14	0	23	GnRH-antagonist	22.1	primary	tubal	4	IVF	7.66	6.26	6.58	38.11	6.66	1	1373	2.73	0.321	14.8	8	3	2020-11-07 11:00:59	2	1	0	1	intrauterine pregnancy		2021-07-01	36	Cesarean	male	2.8	male	2.6
167	2020-11-04 10:00:48	0	30	GnRH-antagonist	17.96	primary	male	1	ICSI	2.22	5.77	5.56	26.75	9.88	2	2066	2.43	0.263	11.4	11	6	2020-11-07 11:45:02	2	2	0	1	intrauterine pregnancy		2021-07-19	38	vaginal	female	2.88
168	2020-11-06 09:00:01	0	42	GnRH-antagonist	21.48	primary	tubal	2	IVF	6.2	NA	NA	NA	11.48	1	1439	6.98	0.621	12.1	6	2	2020-11-09 16:02:44	2	1	0	0
169	2020-11-06 09:30:45	0	27	GnRH-antagonist	23.88	primary	male	2	ICSI	2.81	5.97	3.7	32.43	12.06	2	2518	1.1	0.891	13.2	18	8	2020-11-09 15:45:54	2	2	0	1	intrauterine pregnancy		2021-07-12	37	Cesarean	female	3.3
170	2020-11-08 08:55:10	0	27	GnRH-antagonist	19.91	primary	tubal	2	IVF	4.147	4.79	1.93	30.33	13.56	2	2660	2.62	1	9.3	6	3	2020-11-11 10:20:07	2	1	0	1	intrauterine pregnancy		2021-07-29	39	vaginal	female	2.9
171	2020-11-08 09:50:45	0	20	GnRH-antagonist	20.37	secondary	male	2	ICSI	2.05	5.94	3.4	36.26	7.75	1	1899	2.45	0.286	12.8	10	3	2020-11-11 10:30:29	2	2	0	1	intrauterine pregnancy		2021-07-10	36	vaginal	male	2.1
172	2020-11-12 09:37:32	0	48	GnRH-antagonist	26.71	secondary	tubal	3	IVF	1.76	7.77	2.76	26.73	14.03	1	1578	3.01	0.208	12.2	7	4	2020-11-15 10:53:29	2	2	0	1	intrauterine pregnancy		2021-07-26	38	Cesarean	female	3.1
173	2020-11-12 09:58:54	0	30	GnRH-antagonist	20.13	primary	tubal	8	IVF	2.4	6.82	4.28	68.5	19.58	4	4118	3.03	1.16	9.6	14	5	2020-11-15 10:49:29	2	2	0	0
174	2020-11-13 08:30:37	0	39	GnRH-antagonist	25.71	secondary	tubal	3	IVF	4.15	7.94	3.46	53.7	9.4	1	445	1.34	0.068	8	3	2	2020-11-16 09:55:54	2	1	0	0
175	2020-11-13 09:05:03	1-2	43	GnRH-antagonist	23.31	primary	Unexplained	6	IVF	11.956	4.69	4.26	28.12	7.67	1	889.2	1.64	0.23	11.8	3	2	2020-11-16 10:13:14	2	2	0	0
176	2020-11-14 08:45:38	0	40	GnRH-antagonist	21.6	secondary	tubal	2	IVF	2.61	7.53	7.57	45.19	18	1	1488	7.77	0.438	9.7	5	4	2020-11-17 10:50:17	2	1	0	1	intrauterine pregnancy	yes
177	2020-11-15 08:30:29	0	30	GnRH-antagonist	21.63	secondary	male	5	ICSI	2.59	5.29	6.67	45.23	12.59	2	2240	3.17	0.6	10.1	8	4	2020-11-18 10:33:23	2	2	0	1	intrauterine pregnancy		2021-08-05	39	vaginal	female	3.3
178	2020-11-16 08:56:16	0	31	GnRH-antagonist	19.22	primary	DOR	1	IVF	1.08	6.44	1.98	46.47	20.17	2	2019	3.23	0.922	9.6	7	4	2020-11-19 11:10:17	2	2	0	1	intrauterine pregnancy		2021-06-19	32	Cesarean	female	1.2
179	2020-11-16 09:05:10	≥3	48	GnRH-antagonist	26.64	secondary	tubal	2	IVF	NA	8.81	3.07	24.4	27.52	1	605.9	17.68	0.15	8.7	2	1	2020-11-19 11:02:42	1	1	0	0
180	2020-11-19 09:10:47	0	34	GnRH-antagonist	20.13	secondary	tubal	5	IVF	2.43	5.14	4.06	65.11	12.5	1	1640	4.03	0.286	12.6	10	5	2020-11-22 10:50:59	2	1	0	1	intrauterine pregnancy		2021-08-02	38	vaginal	female	2.9
181	2020-11-20 09:00:18	0	30	GnRH-antagonist	18.86	primary	tubal	4	IVF	2.89	7.31	5.11	12.7	16.18	3	3647	1.7	0.898	16.1	9	6	2020-11-23 10:55:09	1	1	0	1	intrauterine pregnancy		2021-08-01	38	vaginal	female	3.15
182	2020-11-20 09:15:57	1-2	27	GnRH-antagonist	22.03	secondary	male	3	ICSI	1.819	7.49	2.38	15.32	13.51	1	872.6	1.81	0.218	10.4	7	2	2020-11-23 11:26:38	1	1	0	0
183	2020-11-21 09:25:11	1-2	42	GnRH-antagonist	26.04	secondary	DOR	4	IVF	1.39	7.16	5.19	36.09	14.83	1	1657	1.78	0.269	10.4	3	2	2020-11-24 11:10:25	2	2	0	1	intrauterine pregnancy	yes
184	2020-11-22 09:29:59	0	40	GnRH-antagonist	22.31	secondary	DOR	2	IVF	NA	6.97	3.46	34.94	22.48	1	1604	1.73	0.556	12.7	4	2	2020-11-25 11:23:48	1	1	0	0
185	2020-11-23 08:50:47	1-2	33	GnRH-antagonist	21.45	secondary	DOR	1	IVF	0.01	12.41	7.34	5	13.04	1	539.4	9.83	0.217	8.6	1	1	2020-11-26 11:20:49	1	1	0	0
186	2020-11-24 08:45:24	0	35	GnRH-antagonist	20.57	secondary	Endometriosis	5	IVF	1.41	12.93	6.07	42.14	15.38	1	1772	5.49	0.544	8.1	5	2	2020-11-27 10:30:21	2	1	0	0
187	2020-11-25 09:35:28	0	39	GnRH-antagonist	20.96	secondary	male	4	ICSI	1.73	8.02	6.57	46.57	15.03	1	1781	3.55	0.516	10.4	6	2	2020-11-28 10:11:49	1	1	0	0
188	2020-11-25 09:55:09	0	36	GnRH-antagonist	23.44	secondary	tubal	4	IVF	5.59	6.72	8.02	60.82	11.21	3	3700	4.71	0.164	8.9	8	4	2020-11-28 10:15:35	2	2	0	1	intrauterine pregnancy	yes
189	2020-11-27 09:20:18	1-2	37	GnRH-antagonist	19.65	primary	Endometriosis	1	ICSI	1.35	8.39	4.18	48.55	19.41	1	1919	1.29	1.09	11.3	5	2	2020-11-30 11:50:01	2	2	0	0
190	2020-11-27 09:35:04	1-2	38	GnRH-antagonist	21.56	primary	DOR	7	IVF	0.548	6.57	1.79	55.43	16.85	1	838.7	1.67	0.346	10.4	3	3	2020-11-30 10:50:08	2	2	0	1	intrauterine pregnancy	yes
191	2020-11-27 09:50:28	0	29	GnRH-antagonist	25.95	primary	Unexplained	4	IVF	1.73	6.42	4.08	63.83	13.54	1	1985	4.2	0.95	14.1	9	6	2020-11-30 11:05:03	1	1	0	1	intrauterine pregnancy	yes
192	2020-11-29 08:55:11	0	30	GnRH-antagonist	27.43	secondary	DOR	3	IVF	0.433	2	4.94	57.3	14.72	1	781.1	1.82	0.168	14	2	1	2020-12-02 10:56:40	1	1	0	1	intrauterine pregnancy		2021-08-08	38	Cesarean	female	3.15
193	2020-11-29 10:30:00	0	42	GnRH-antagonist	21.48	secondary	tubal	10	IVF	0.722	9	4.01	44.82	20.04	1	948.7	3.9	0.563	8.9	5	4	2020-12-02 11:35:35	2	2	0	0
194	2020-11-29 11:00:24	1-2	28	GnRH-antagonist	17.75	primary	tubal	6	ICSI	NA	5.31	4.87	40.12	12.45	2	2703	2.12	0.279	11.8	7	3	2020-12-02 10:55:47	1	1	0	0
195	2020-11-29 11:40:00	0	29	GnRH-antagonist	22.77	secondary	tubal	7	IVF	0.512	12.41	5.88	26.22	18.65	1	1024	8.53	0.667	10.8	5	4	2020-12-02 11:08:18	1	1	0	0
196	2020-11-30 09:56:04	0	35	GnRH-antagonist	17.65	primary	tubal	8	IVF	3.34	4.66	1.54	45.78	15.9	1	1129	1.84	1.05	11	9	4	2020-12-03 11:05:14	2	2	0	1	intrauterine pregnancy		2021-08-17	39	vaginal	female	3.18
197	2020-12-01 09:00:13	0	25	GnRH-antagonist	28.76	primary	tubal	2	IVF	10.4	5.18	5.4	45.36	9.19	3	3583	8.75	1.12	11.4	14	4	2020-12-04 10:55:21	1	1	0	0
198	2020-12-02 09:10:27	1-2	34	GnRH-antagonist	22.48	secondary	tubal	3	IVF	0.637	11.17	5.79	52.37	16	1	1433	4.35	0.548	10	2	2	2020-12-05 10:55:16	2	1	0	0
199	2020-12-04 09:20:04	0	25	GnRH-antagonist	22.89	primary	tubal	4	IVF	3.31	6.47	5.54	35.22	10.1	4	4410	2.01	0.231	8.6	14	10	2020-12-07 11:10:19	2	2	0	0
200	2020-12-06 08:36:14	1-2	34	GnRH-antagonist	21.16	secondary	tubal	4	ICSI	0.664	5.43	2.91	3.03	14.28	1	1375	3.78	0.227	8.7	7	5	2020-12-09 11:15:57	2	1	0	1	intrauterine pregnancy		2021-08-16	38	Cesarean	male	2.76	male	3.1
201	2020-12-08 09:09:26	0	34	GnRH-antagonist	20	secondary	tubal	10	IVF	4.95	7.65	5.84	27.39	15.31	1	1890	3.36	0.964	8.3	6	2	2020-12-11 10:22:29	2	1	0	0
202	2020-12-08 09:20:07	0	37	GnRH-antagonist	25	primary	tubal	9	IVF	8.85	4.68	8.04	40.5	12.9	2	2263	8.65	0.469	12.6	8	4	2020-12-11 11:10:08	2	2	0	1	intrauterine pregnancy		2021-07-23	34	vaginal	female	1.8	female	1.9
203	2020-12-08 09:42:11	0	30	GnRH-antagonist	16.82	primary	male	2	IVF	3.58	6.26	4.51	38.65	9.6	1	929.5	1	0.336	9.9	8	3	2020-12-11 11:06:00	1	1	0	0
204	2020-12-11 08:55:35	0	42	GnRH-antagonist	27.29	secondary	DOR	2	IVF	1.68	8.12	5.8	53.92	11.25	1	1852	2.76	0.65	9.4	10	5	2020-12-14 11:35:02	2	2	0	0
205	2020-12-13 08:50:29	0	32	GnRH-antagonist	18.75	primary	Unexplained	3	IVF	3.99	4.45	3.65	39.78	13.77	1	1727	0.608	0.486	9.3	14	6	2020-12-16 10:55:35	2	2	0	1	intrauterine pregnancy		2021-06-18	28	Cesarean	male	1.3	male	1.2
206	2020-12-14 09:10:03	0	30	GnRH-antagonist	20.06	secondary	tubal	4	ICSI	7.25	6.3	5.45	36	13.65	3	3494	5.63	0.707	9.2	12	2	2020-12-17 10:25:40	2	2	0	1	intrauterine pregnancy		2021-09-13	41	vaginal	female	3.48
207	2020-12-16 08:25:19	1-2	47	GnRH-antagonist	21.57	secondary	tubal	2	IVF	0.534	10.36	7.1	62.98	14.84	1	1821	9.52	0.538	13.9	3	2	2020-12-19 10:30:22	2	1	0	0
208	2020-12-16 09:30:46	1-2	37	GnRH-antagonist	20.96	primary	tubal	1	ICSI	0.979	7.47	3.41	28.14	16.51	1	1518	2.41	1.1	8.2	11	7	2020-12-19 12:15:22	2	1	0	0
209	2020-12-17 08:56:21	0	21	GnRH-antagonist	16.44	secondary	tubal	2	IVF	3.08	7.93	4.42	68.02	20.54	1	1870	0.969	0.348	8.1	8	5	2020-12-20 11:00:31	2	1	0	0
210	2020-12-18 08:35:17	1-2	46	GnRH-antagonist	21.34	secondary	tubal	4	IVF	0.438	6.27	2.37	34.03	10.44	1	438.2	4.95	0.1	9.3	2	1	2020-12-21 11:25:07	1	1	0	0
211	2020-12-18 08:52:05	0	38	GnRH-antagonist	22.27	secondary	tubal	1	IVF	1.05	9.56	3.04	57	14.16	1	850.2	5.65	0.427	7.6	4	2	2020-12-21 11:10:17	2	2	0	0
212	2020-12-19 09:15:00	0	30	GnRH-antagonist	23.5	primary	male	5	ICSI	3.61	7.16	5.33	34.41	11.3	3	3995	3.08	1.07	8.5	14	9	2020-12-22 10:20:03	2	2	0	1	intrauterine pregnancy		2021-08-15	36	Cesarean	female	2.3
213	2020-12-20 08:45:17	0	31	GnRH-antagonist	19.05	primary	tubal	4	IVF	2.31	7.74	5.44	45.06	14.47	1	1309	2.79	0.709	11.1	6	4	2020-12-23 11:40:08	1	1	0	1	intrauterine pregnancy		2021-09-09	39	vaginal	female	2.85
214	2020-12-22 09:40:03	1-2	37	GnRH-antagonist	18.66	primary	male	5	ICSI	2.35	7.59	7.21	32.07	15.09	1	1817	3.84	0.277	11.1	5	4	2020-12-25 11:40:54	2	1	0	1	intrauterine pregnancy		2021-09-17	40	vaginal	female	3.1
215	2020-12-23 09:20:59	0	38	GnRH-antagonist	23.63	secondary	tubal	1	IVF	1.63	6.11	6.69	43.62	13.04	1	732.7	0.859	0.177	8.1	4	4	2020-12-26 11:05:08	2	1	0	0
216	2020-12-23 09:38:15	0	34	GnRH-antagonist	23.44	secondary	DOR	1	IVF	0.93	7.04	2.84	46.05	12.77	1	1212	3.72	0.571	7.7	6	6	2020-12-26 11:10:15	1	1	1	1	intrauterine pregnancy		2021-09-07	38	Cesarean	female	3.3
217	2020-12-24 08:36:49	1-2	47	GnRH-antagonist	21.88	secondary	DOR	1	IVF	0.37	6.37	3.98	79.5	20.75	1	1089	6.31	0.373	10	4	2	2020-12-27 11:17:03	2	2	0	0
218	2020-12-25 09:13:26	1-2	33	GnRH-antagonist	21.09	secondary	tubal	1	IVF	NA	5.5	3.72	74.45	13.93	1	972.7	2.51	0.959	10.9	5	4	2020-12-28 11:50:11	2	2	0	1	intrauterine pregnancy		2021-08-31	37	vaginal	male	2.5
219	2020-12-25 09:15:43	1-2	33	GnRH-antagonist	22.03	primary	male	2	ICSI	3.131	9.35	6.18	33.38	15.9	1	879.1	4.09	0.303	14	8	6	2020-12-28 10:45:06	2	2	0	1	intrauterine pregnancy		2021-09-13	39	vaginal	male	3.3
220	2020-12-25 09:26:55	0	24	GnRH-antagonist	26.89	secondary	tubal	1	IVF	2.16	4.72	3.01	10	9.6	1	1661	1.3	0.27	13.9	6	2	2020-12-28 11:30:18	2	1	0	0
221	2020-12-26 09:00:08	0	30	GnRH-antagonist	18.97	secondary	DOR	1	IVF	1.09	9.31	6.09	48.5	18.68	1	1102	0.992	0.446	10.3	6	5	2020-12-29 11:46:08	2	1	0	1	intrauterine pregnancy		2021-08-27	36	Cesarean	male	2.5	female	2.4
222	2020-12-26 09:15:51	1-2	35	GnRH-antagonist	22.06	primary	Endometriosis	2	IVF	0.56	9.54	4.79	72.03	20.68	2	2606	5.75	0.847	11.9	11	5	2020-12-29 11:10:25	1	1	0	1	intrauterine pregnancy		2021-08-27	36	Cesarean	male	2.4
223	2020-12-26 09:40:55	0	37	GnRH-antagonist	20.7	primary	tubal	3	IVF	2.13	8.06	4.79	39.02	12.13	1	1974	2.74	0.484	9.6	11	5	2020-12-29 11:29:47	1	1	0	1	intrauterine pregnancy	yes
224	2020-12-26 10:05:09	0	30	GnRH-antagonist	21.56	primary	male	3	IVF	4.55	5.01	4.51	60.22	10.18	1	1466	1.54	0.422	11	13	4	2020-12-29 11:05:01	2	1	0	0
225	2020-12-30 09:15:42	0	31	GnRH-antagonist	20.9	secondary	Mixed	2	IVF	9.02	5.68	6.34	53.24	13.51	1	1021	1.55	0.238	9.6	11	4	2021-01-02 11:50:31	2	2	0	1	intrauterine pregnancy		2021-09-25	40	vaginal	male	3.55
226	2020-12-30 09:40:51	0	42	GnRH-antagonist	19.04	secondary	tubal	1	IVF	1.62	11.01	3.72	75.85	27.06	2	2043	2.88	0.314	10.6	3	3	2021-01-02 11:45:09	2	1	0	0
227	2020-12-31 08:50:58	0	38	GnRH-antagonist	21.36	secondary	tubal	10	IVF	0.923	6.29	3.53	70.72	23.77	1	927.1	11.67	0.202	8.5	2	1	2021-01-03 11:15:48	1	1	0	0
228	2020-12-31 09:40:09	0	37	GnRH-antagonist	NA	secondary	tubal	5	IVF	0.845	6.69	2.89	45.24	18.86	1	1853	1.76	0.767	11.8	9	3	2021-01-03 11:20:45	2	1	0	1	intrauterine pregnancy		2021-08-30	36	Cesarean	female	2.3	female	2.65
229	2021-01-01 09:12:20	0	38	GnRH-antagonist	16.82	secondary	male	5	IVF	2.11	8.53	2.3	56.57	12.63	2	2809	3.43	0.656	11.2	9	6	2021-01-04 11:25:59	1	1	0	0
230	2021-01-02 08:40:00	≥3	45	GnRH-antagonist	19.15	primary	Mixed	12	IVF	NA	4.99	1.8	69.12	23.18	1	1336	11.81	0.829	8.8	2	1	2021-01-05 10:55:32	1	1	0	0
231	2021-01-04 08:52:43	0	36	GnRH-antagonist	23.31	secondary	tubal	1	IVF	1.09	7.61	7.44	38.43	14.5	1	1794	4.16	0.664	10.5	4	3	2021-01-07 12:13:48	2	1	0	0
232	2021-01-04 09:16:53	0	36	GnRH-antagonist	20.32	secondary	tubal	1	IVF	7.12	8.13	3.61	55.83	15.6	2	2675	4.17	0.808	11.6	17	6	2021-01-07 11:20:50	2	1	0	1	intrauterine pregnancy	yes
233	2021-01-04 09:32:57	0	40	GnRH-antagonist	22.83	secondary	Ovulatory	12	IVF	8.11	10.52	5.51	77.51	9.6	4	4247	1.5	0.586	8.2	18	4	2021-01-07 11:35:27	2	2	0	0
234	2021-01-04 09:46:21	0	32	GnRH-antagonist	20.96	primary	Mixed	6	IVF	2.92	5.81	5.73	32.2	12.62	3	3427	2.98	0.763	14.2	12	4	2021-01-07 11:30:57	2	1	0	0
235	2021-01-04 09:54:49	0	35	GnRH-antagonist	21.78	secondary	male	5	IVF	3.23	8.3	6.04	40.54	10.6	3	3650	6.38	0.932	10.9	19	14	2021-01-07 12:22:18	2	2	0	1	intrauterine pregnancy		2021-09-09	37	vaginal	female	2.6
236	2021-01-04 09:56:19	0	33	GnRH-antagonist	18.83	primary	Unexplained	2	IVF	1.725	7.9	3.33	48.85	21.16	2	2397	2.23	0.711	12.2	12	7	2021-01-07 10:52:53	2	2	0	1	intrauterine pregnancy		2021-09-03	36	Cesarean	female	1.75	female	1.75
237	2021-01-05 09:05:25	0	38	GnRH-antagonist	24.44	primary	Unexplained	5	IVF	0.5	6.84	6.44	64.51	14.53	1	667.1	3.41	0.18	7.9	2	1	2021-01-08 10:30:25	1	1	0	0
238	2021-01-06 09:00:02	1-2	28	GnRH-antagonist	16.44	secondary	tubal	1	IVF	4.36	5.17	3.88	28.79	13.78	2	2046	10.83	1.15	10.7	17	10	2021-01-09 10:26:57	1	1	0	0
239	2021-01-07 08:55:15	1-2	40	GnRH-antagonist	24.65	secondary	DOR	6	IVF	0.887	6.18	3.6	60.56	25.74	2	2694	8.38	0.856	12.3	4	2	2021-01-10 10:55:44	2	2	0	1	intrauterine pregnancy	yes
240	2021-01-07 09:40:35	0	24	GnRH-antagonist	21.34	primary	Unexplained	3	IVF	3.48	5.46	5.14	36	12.68	2	2986	4.42	0.985	11.5	6	5	2021-01-10 10:30:52	2	2	0	0
241	2021-01-08 08:56:22	0	30	GnRH-antagonist	29.17	primary	tubal	8	IVF	2.17	5.9	5.14	25.72	10.64	1	1503	8.44	0.609	15.2	5	2	2021-01-11 11:15:43	2	2	0	0
242	2021-01-08 09:10:41	1-2	43	GnRH-antagonist	21.48	primary	tubal	2	IVF	6.2	6.74	4.89	36.73	11.1	1	1913	6.09	0.997	9.5	14	4	2021-01-11 11:28:39	2	2	0	0
243	2021-01-09 09:06:23	0	35	GnRH-antagonist	22.86	secondary	tubal	2	IVF	4.09	4.24	1.95	45.07	17.64	2	2518	2.42	0.855	9.3	6	5	2021-01-12 10:40:41	2	2	0	1	intrauterine pregnancy		2021-08-26	34	Cesarean	male	2.2	female	1.3
244	2021-01-10 08:55:13	0	31	GnRH-antagonist	20.44	secondary	male	1	IVF	1.14	7.01	5.9	28.14	14.74	1	1553	6.76	0.664	9.3	4	2	2021-01-13 11:05:18	1	1	0	0
245	2021-01-10 09:20:17	0	31	GnRH-antagonist	19.57	primary	male	5	ICSI	1.91	7.83	8.6	57.29	17.43	1	1523	3.71	0.681	12.7	8	2	2021-01-13 10:55:55	2	1	0	1	intrauterine pregnancy		2021-09-24	38	vaginal	male	2.85
246	2021-01-10 09:45:56	0	33	GnRH-antagonist	18.93	secondary	Endometriosis	7	IVF	4.41	6.35	9.91	29.63	9.56	3	3580	1.8	0.54	12.6	9	1	2021-01-13 11:15:17	1	1	0	0
247	2021-01-13 08:45:50	0	30	GnRH-antagonist	20.05	primary	male	2	ICSI	7.59	9.1	9.02	15.26	15.46	4	4013	5.42	1.04	8.4	15	6	2021-01-16 11:38:02	2	2	0	0
248	2021-01-13 09:25:40	0	31	GnRH-antagonist	21.36	primary	Unexplained	3	IVF	2.15	5.8	4.62	26.99	12.7	1	1572	2.83	0.691	10.7	7	4	2021-01-16 11:32:13	2	1	0	1	intrauterine pregnancy		2021-09-27	38	vaginal	male	2.6
249	2021-01-13 09:55:39	0	32	GnRH-antagonist	22.48	secondary	tubal	1	IVF	2.1	6.29	5.41	50.63	12.83	1	1761	3.02	0.513	11.3	6	4	2021-01-16 11:43:36	2	2	0	1	intrauterine pregnancy		2021-09-27	38	Cesarean	male	3.4
250	2021-01-14 09:15:30	0	33	GnRH-antagonist	23.78	primary	DOR	5	IVF	0.297	7.62	3.43	37.6	15.88	1	1628	4.84	0.991	11.4	6	4	2021-01-17 11:55:29	1	1	0	0
251	2021-01-15 08:40:31	0	34	GnRH-antagonist	24.22	secondary	tubal	8	IVF	1.13	12.93	5.83	22.46	15.85	1	946.7	9.18	0.835	11.3	5	3	2021-01-18 12:32:47	2	1	0	0
252	2021-01-15 08:50:11	0	34	GnRH-antagonist	25.36	primary	tubal	6	IVF	0.707	6.31	1.62	37.34	12.14	1	1513	2.59	0.653	12.8	10	4	2021-01-18 12:37:47	2	2	0	1	intrauterine pregnancy		2021-10-10	40	Cesarean	female	3.05
253	2021-01-18 08:45:38	0	39	GnRH-antagonist	22.1	secondary	tubal	1	ICSI	NA	10.45	8.9	19.88	12.97	1	469.7	11.02	0.086	12.1	1	1	2021-01-21 11:13:12	1	1	0	0
254	2021-01-18 09:10:52	1-2	41	GnRH-antagonist	22.31	secondary	DOR	2	IVF	NA	6.97	3.46	34.94	23.25	1	1344	2.76	0.641	16	6	3	2021-01-21 11:25:47	2	2	0	0
255	2021-01-18 09:39:55	0	35	GnRH-antagonist	22.43	secondary	tubal	2	IVF	1.03	11.07	3.51	27.8	17.76	1	1692	5.73	0.345	15	5	3	2021-01-21 10:55:10	2	2	0	1	intrauterine pregnancy		2021-09-19	36	Cesarean	female	2.5	male	2.55
256	2021-01-19 09:20:57	0	27	GnRH-antagonist	28.89	primary	Ovulatory	6	IVF	5.57	4.5	12.96	34.21	11	3	3660	2.81	0.317	12.6	15	10	2021-01-22 11:45:08	2	2	1	1	intrauterine pregnancy		2021-10-02	38	Cesarean	male	3.25
257	2021-01-21 08:35:55	0	33	GnRH-antagonist	23.63	primary	tubal	13	IVF	1.99	6.82	3.96	51	12.89	1	1774	0.801	1.2	8.2	14	11	2021-01-24 10:10:57	2	2	0	0
258	2021-01-22 09:25:22	0	30	GnRH-antagonist	31.11	secondary	tubal	1	IVF	4.15	5.34	7.37	43.42	10.01	2	2393	4.7	0.69	8.4	13	4	2021-01-25 11:30:08	1	1	0	0
259	2021-01-24 09:10:01	0	31	GnRH-antagonist	18.73	primary	male	1	ICSI	5.18	6.01	3.72	49.69	13.11	1	1602.9	1.16	0.42	11.1	8	7	2021-01-27 11:05:18	1	1	0	0
260	2021-01-24 09:30:15	0	27	GnRH-antagonist	20.31	primary	Endometriosis	2	IVF	2.76	7.84	5.08	56.21	13.42	3	3248.77	1.31	0.66	10.1	10	3	2021-01-27 11:10:36	2	2	0	1		yes
261	2021-01-27 09:40:02	0	34	GnRH-antagonist	28.04	secondary	Endometriosis	2	IVF	4.131	8.18	5.72	45.22	14.28	2	2550	3.7	0.56	13	13	7	2021-01-30 10:05:17	2	2	0	0
262	2021-01-28 10:05:22	0	32	GnRH-antagonist	18.9	primary	Mixed	11	IVF	2.51	7.42	5.07	39.34	14.31	3	3419	1.82	0.69	12	13	8	2021-01-31 10:04:58	2	2	0	1	intrauterine pregnancy		2021-10-11	38	vaginal	male	3.33
263	2021-01-29 09:45:41	≥3	47	GnRH-antagonist	20.7	secondary	male	7	ICSI	0.866	7.06	3.64	53.81	20.92	1	1641	5.09	0.95	9.9	9	5	2021-02-01 10:45:14	2	2	0	0
264	2021-01-29 09:50:28	0	36	GnRH-antagonist	22.31	secondary	male	6	ICSI	1.75	9.26	5.09	71.28	18.07	1	1589	6.02	0.92	12.6	5	3	2021-02-01 11:35:53	2	1	0	1	intrauterine pregnancy		2021-10-15	39	Cesarean	female	3.4
265	2021-01-29 10:20:02	0	33	GnRH-antagonist	22.46	secondary	tubal	4	IVF	2.38	7.12	5.19	40.53	9.76	1	1069	8.53	0.19	14.1	5	4	2021-02-01 10:25:33	2	1	0	1	intrauterine pregnancy		2021-10-24	40	vaginal	female	3.7
266	2021-01-30 08:35:26	0	31	GnRH-antagonist	19.03	secondary	Unexplained	2	IVF	1.75	6.31	6.29	62.28	14.6	1	1108	6.46	0.44	9.8	2	2	2021-02-02 11:36:05	2	1	0	1	intrauterine pregnancy		2021-10-13	38	vaginal	male	3.65
267	2021-01-31 08:36:01	1-2	40	GnRH-antagonist	21.34	primary	Unexplained	5	ICSI	9.227	8.64	6.54	36.11	12.45	1	1804	3.1	0.68	9.4	10	8	2021-02-03 11:45:01	2	2	0	0
268	2021-02-27 08:36:03	0	43	GnRH-antagonist	28.55	secondary	Mixed	8	IVF	1.04	6.6	3.6	30.7	13.88	1	1165	4.46	0.27	8.8	5	4	2021-03-02 10:51:00	2	2	0	0			2021-03-16 15:42:51
269	2021-02-28 09:40:47	0	38	GnRH-antagonist	21.77	primary	DOR	2	IVF	1	5.86	2.89	55.72	21.84	1	1348	2.18	0.95	11.7	6	5	2021-03-03 11:55:50	2	1	0	1	ectopic pregnancy
270	2021-03-03 08:45:06	0	41	GnRH-antagonist	22.04	secondary	tubal	3	IVF	NA	7.25	5.29	43.83	20.76	1	581.9	4.36	0.25	9.8	2	2	2021-03-06 11:25:08	2	2	0	0
271	2021-03-03 09:30:53	0	43	GnRH-antagonist	22.48	secondary	tubal	2	IVF	3.33	6.2	5.08	38.75	12.02	2	2377	5.03	0.5	8	7	3	2021-03-06 11:50:30	2	1	1	1	intrauterine pregnancy		2021-10-28	36	vaginal	male	3.1
272	2021-03-05 09:10:47	0	36	GnRH-antagonist	22.22	secondary	tubal	4	IVF	3.3	5.72	2.49	31.55	10.6	1	1960	2.86	0.46	8.1	5	2	2021-03-08 11:05:00	1	1	0	0
273	2021-03-06 08:50:14	0	31	GnRH-antagonist	17.24	primary	male	8	ICSI	1.67	9.19	6.69	36.67	10.03	1	1143	0.56	0.44	9.5	7	4	2021-03-09 11:20:56	2	2	1	1	intrauterine pregnancy		2021-11-01	36	Cesarean	male	2.35	female	2
274	2021-03-06 09:10:14	0	29	GnRH-antagonist	21.08	primary	Unexplained	7	IVF	2.434	5.22	4.22	35.09	8.95	1	1875	1.95	0.59	15.7	7	4	2021-03-09 10:45:35	1	1	0	1	intrauterine pregnancy		2021-11-26	39	vaginal	male	2.25
275	2021-03-06 09:25:29	1-2	30	GnRH-antagonist	20.83	primary	Mixed	2	ICSI	NA	8.5	5.15	36.85	7.82	2	2107	4.07	0.29	15	8	4	2021-03-09 10:48:04	2	2	0	1	intrauterine pregnancy		2021-10-28	35	Cesarean	female	2.55	female	2.3
276	2021-03-07 08:50:34	≥3	37	GnRH-antagonist	21.64	secondary	tubal	5	IVF	0.39	10.92	6.6	23.21	22.61	1	470.3	1.96	0.2	9.1	2	2	2021-03-10 11:08:04	2	2	0	1	intrauterine pregnancy		2021-11-09	37	Cesarean	male	2.98	female	2.68
277	2021-03-07 09:00:03	≥3	42	GnRH-antagonist	19.1	secondary	tubal	3	IVF	3.208	5.18	4.18	39.1	15.51	1	813.9	2.6	0.29	9.1	4	1	2021-03-10 10:02:11	1	1	0	0
278	2021-03-08 08:55:42	0	37	GnRH-antagonist	23.03	primary	DOR	6	IVF	0.857	6.04	1.92	42.51	15.28	1	934	3.77	0.63	11.9	7	3	2021-03-11 10:46:34	2	2	0	0
279	2021-03-08 09:30:49	0	31	GnRH-antagonist	25.1	primary	male	6	ICSI	4.74	7.1	2.63	28.57	12.62	2	2559	2.64	0.78	13.3	13	7	2021-03-11 11:25:25	2	2	0	1	ectopic pregnancy
280	2021-03-10 08:55:46	1-2	28	GnRH-antagonist	19.92	secondary	Endometriosis	1	IVF	2.14	6.9	3.71	68.7	13.42	2	2181	2.86	0.31	12.7	4	4	2021-03-13 12:20:27	1	1	1	1	intrauterine pregnancy		2021-11-17	38	Cesarean	female	2.85
281	2021-03-10 09:30:22	0	28	GnRH-antagonist	20.2	secondary	tubal	1	ICSI	3	6.87	4.61	59.59	11.96	2	2329	4.17	0.26	14.7	10	5	2021-03-13 12:05:19	2	2	0	1	intrauterine pregnancy		2021-10-05	31	Cesarean	male	1.5	female	1.3
282	2021-03-10 09:40:41	0	26	GnRH-antagonist	23.31	secondary	tubal	3	IVF	5.49	6.05	6.84	61.22	8.77	2	2907	19.09	0.91	7.4	4	4	2021-03-13 11:20:58	1	1	0	0
283	2021-03-11 08:40:52	1-2	42	GnRH-antagonist	23.68	secondary	Unexplained	2	IVF	2.2	7.88	4.36	60.65	23.38	1	1429	3.58	0.43	9.9	5	3	2021-03-14 10:05:11	2	2	0	1		yes
284	2021-03-13 08:50:45	0	24	GnRH-antagonist	19.72	secondary	Unexplained	1	IVF	5.83	5.02	5.46	50.18	12.57	2	2660.74	0.32	0.49	10.1	19	12	2021-03-16 11:05:11	2	2	0	1	intrauterine pregnancy		2021-12-07	40	Cesarean	female	3.5
285	2021-03-14 08:45:11	0	35	GnRH-antagonist	19.84	secondary	male	6	IVF	1.69	5.82	2.86	68	11.23	1	936.56	1.38	0.49	10.9	10	5	2021-03-17 10:30:28	2	1	0	1	intrauterine pregnancy		2021-11-17	37	Cesarean	female	2.5	female
286	2021-03-16 08:50:38	1-2	33	GnRH-antagonist	26.57	secondary	tubal	2	ICSI	0.61	7.02	3.23	29.61	14.24	1	701.21	2.53	0.19	10.2	5	3	2021-03-19 12:00:29	2	2	0	0
287	2021-03-16 09:20:08	0	29	GnRH-antagonist	20.7	primary	tubal	3	IVF	3.72	6.22	5.75	27.3	10.3	1	1803	2.69	0.33	11.1	11	5	2021-03-19 10:40:46	2	1	0	0
288	2021-03-17 09:00:39	0	29	GnRH-antagonist	22.72	primary	Unexplained	4	IVF	2.03	5.03	4.77	29.53	14.98	3	3355	0.89	0.64	12.4	14	7	2021-03-20 11:45:03	2	2	0	1	intrauterine pregnancy		2021-09-16	28	Cesarean	male	1
289	2021-03-17 09:15:57	0	32	GnRH-antagonist	24.84	secondary	Ovulatory	2	IVF	3.064	3.73	3.69	72.93	7.91	3	3416.29	2.39	0.23	8	8	6	2021-03-20 10:25:20	2	2	0	0
290	2021-03-18 09:00:31	0	27	GnRH-antagonist	28.72	primary	tubal	3	IVF	2.82	6.22	6.25	38.41	9.21	1	1225	4.1	0.04	11.1	7	4	2021-03-21 12:30:42	2	2	0	1		yes
291	2021-03-18 09:30:38	0	40	GnRH-antagonist	22.67	secondary	DOR	2	IVF	1.51	4.3	3.98	63.87	17.6	2	2441	12.4	0.41	10.8	9	5	2021-03-21 11:58:34	2	1	0	0
292	2021-03-19 09:30:00	0	41	GnRH-antagonist	22.19	secondary	tubal	5	IVF	2.12	6.68	3.15	40.09	15.68	1	1400	2.05	0.67	14.2	6	4	2021-03-22 11:05:49	2	2	0	0
293	2021-03-20 08:35:43	0	29	GnRH-antagonist	19.56	secondary	Endometriosis	1	IVF	5.29	4.14	3.75	40.93	11.21	4	4294	2.03	1.19	9.8	13	5	2021-03-23 11:00:42	2	2	0	0
294	2021-03-20 08:50:11	0	28	GnRH-antagonist	20.43	secondary	tubal	1	IVF	5.21	6.84	4.32	28.27	14.45	1	1814.94	2.58	0.38	10.8	8	6	2021-03-23 12:15:12	2	2	0	1	intrauterine pregnancy		2021-10-19	32	Cesarean	male	2.1	female	1.6
295	2021-03-21 09:40:09	1-2	34	GnRH-antagonist	19.77	secondary	tubal	3	IVF	1.32	7.94	5.64	34.84	15.8	1	1748	1.74	0.45	8.9	8	3	2021-03-24 12:05:30	2	1	0	0
296	2021-03-21 10:15:11	0	32	GnRH-antagonist	21.48	primary	tubal	4	IVF	6.37	8.52	6.15	82.84	10.78	4	4408	10.62	0.8	9	15	4	2021-03-24 12:25:46	2	1	1	1	intrauterine pregnancy		2021-10-10	31	Cesarean	female	1.5	female	1
297	2021-03-24 08:50:53	1-2	31	GnRH-antagonist	23.61	primary	DOR	5	ICSI	1.81	11.61	2.4	30.9	17.26	1	1600	1	0.43	9.6	9	6	2021-03-27 11:20:09	2	2	0	0
298	2021-03-26 08:50:01	0	33	GnRH-antagonist	25.32	primary	Unexplained	3	IVF	3.585	6.22	4.4	28.82	14	2	2635	0.96	0.47	11	14	3	2021-03-29 12:00:33	2	1	0	1	intrauterine pregnancy		2021-11-13	35	Cesarean	female	2	female	1.9
299	2021-03-27 08:55:00	0	31	GnRH-antagonist	21.79	primary	Ovulatory	6	IVF	8.051	6.84	6.13	22.45	10.3	3	3150.02	4.61	1.3	10.9	8	3	2021-03-30 10:55:34	1	1	0	0
300	2021-03-27 09:45:42	0	25	GnRH-antagonist	19.63	primary	male	7	ICSI	4.18	6.33	9.34	45.86	12.62	3	3015.34	0.98	0.81	10.3	17	11	2021-03-30 11:55:12	1	1	0	1	intrauterine pregnancy		2021-12-22	40	Cesarean	female	3.39
301	2021-03-30 09:05:48	0	32	GnRH-antagonist	20.28	secondary	tubal	2	IVF	1.44	5.59	4.47	43.37	17.51	1	1309.78	1.89	0.27	9.4	6	6	2021-04-02 10:25:34	1	1	0	1	intrauterine pregnancy		2021-12-22	40	Cesarean	female	3.3
302	2021-03-30 09:15:07	1-2	28	GnRH-antagonist	20.55	primary	tubal	2	IVF	0.559	6.85	2.75	40.57	11.86	1	1006.34	0.46	0.1	13.1	4	3	2021-04-02 11:40:55	2	1	0	1	intrauterine pregnancy	yes
303	2021-03-30 09:25:43	0	41	GnRH-antagonist	21.03	secondary	Unexplained	2	IVF	2.65	8.18	4.54	44	11.92	3	3806.74	1.3	0.54	10	12	7	2021-04-02 11:20:40	1	1	1	1	intrauterine pregnancy		2021-12-20	39	Cesarean	male	3.15
304	2021-03-30 09:30:44	0	30	GnRH-antagonist	22.86	secondary	Unexplained	1	IVF	2.41	5.49	4.39	43.82	12.68	3	3077.79	0.84	0.72	12.2	13	7	2021-04-02 11:35:14	1	1	0	0
305	2021-03-31 08:40:44	0	36	GnRH-antagonist	19.56	secondary	tubal	6	IVF	0.858	14.12	4.16	29.68	17.94	1	521	3.21	0.47	7.8	1	1	2021-04-03 11:40:57	1	1	0	1	intrauterine pregnancy		2021-12-08	38	Cesarean	male	2.95
306	2021-04-02 09:01:48	0	41	GnRH-antagonist	23.31	secondary	tubal	6	IVF	NA	7.83	2.81	38.64	22.54	1	678.79	1.16	0.19	7	2	1	2021-04-05 11:05:04	1	1	0	0
307	2021-04-03 08:50:45	0	30	GnRH-antagonist	20.51	primary	Unexplained	1	IVF	3.47	8.18	7.84	41.13	12.34	1	1832.36	2.06	0.27	8.2	6	3	2021-04-06 10:42:35	2	2	0	1	intrauterine pregnancy		2021-12-21	39	vaginal	female	2.92
308	2021-04-03 09:50:52	1-2	34	GnRH-antagonist	20	secondary	tubal	10	ICSI	4.95	7.65	5.84	27.39	16.1	2	2721.25	1.8	0.46	13.1	6	3	2021-04-06 10:55:57	1	1	0	1	intrauterine pregnancy		2021-12-11	38	Cesarean	male	2.4
309	2021-04-03 10:25:57	0	32	GnRH-antagonist	28.69	primary	male	3	ICSI	2.79	5.94	2.41	39.58	12.58	2	2523.36	11.24	0.6	12.7	9	4	2021-04-06 11:00:56	2	1	0	1	intrauterine pregnancy		2021-11-30	36	Cesarean	male	2.95	female	2.55
310	2021-04-04 09:20:03	0	31	GnRH-antagonist	21.48	secondary	tubal	1	IVF	5.03	6.47	3.88	28.12	13.75	3	3335.7	2.42	0.59	11.5	17	9	2021-04-07 10:30:50	2	2	0	0
311	2021-04-08 08:40:58	1-2	44	GnRH-antagonist	22.03	secondary	tubal	19	IVF	1.51	6.62	4.85	64.34	21.57	1	1988.74	9.75	0.65	10.4	8	5	2021-04-11 11:21:00	2	1	0	0
312	2021-04-08 09:20:43	0	32	GnRH-antagonist	21.34	secondary	tubal	5	IVF	1.67	7.52	3.3	53.5	13.13	2	2650.55	1.74	0.59	9.2	16	5	2021-04-11 11:05:52	1	1	0	0
313	2021-04-08 09:55:10	0	42	GnRH-antagonist	18.73	secondary	Mixed	1	IVF	2.61	7.64	5.25	54.5	16.31	1	1534.66	0.81	0.33	7	11	5	2021-04-11 11:15:31	2	2	0	1	intrauterine pregnancy		2021-12-20	38	vaginal	female	3.5
314	2021-04-09 08:25:41	0	43	GnRH-antagonist	26.06	secondary	tubal	1	IVF	0.81	8.44	3.53	40.05	20.44	1	364.08	2.59	0.1	9.9	2	1	2021-04-12 11:02:12	1	1	0	0
315	2021-04-09 08:45:03	0	29	GnRH-antagonist	23.34	secondary	tubal	1	IVF	3.31	6.98	6.2	40.68	10.13	2	2427.04	3.71	0.3	9.8	9	5	2021-04-12 11:05:28	2	2	0	0
316	2021-04-09 09:00:15	0	31	GnRH-antagonist	25.39	secondary	tubal	1	IVF	3.72	6.2	3.1	31.33	12.69	2	2477.45	1.06	0.41	6.9	13	6	2021-04-12 11:40:24	2	1	0	1	intrauterine pregnancy		2021-12-17	38	vaginal	male	3.1
317	2021-04-13 09:30:33	0	32	GnRH-antagonist	22.03	primary	Endometriosis	6	IVF	3.57	6.04	5.91	49.49	14.45	2	2940	3.09	0.43	9.1	15	11	2021-04-16 11:05:52	1	1	0	0
318	2021-04-16 08:40:00	1-2	36	GnRH-antagonist	16.97	secondary	Endometriosis	2	IVF	NA	6.43	3.2	43.05	21.56	2	2505.72	1.56	0.64	13.8	11	3	2021-04-19 10:28:18	1	1	0	0
319	2021-04-16 09:37:00	0	30	GnRH-antagonist	18.83	primary	male	2	ICSI	2.75	7.44	3.18	25.99	16.35	1	1975.32	1.87	0.36	10.5	9	6	2021-04-19 11:15:42	2	2	0	1	intrauterine pregnancy		2021-12-17	37	Cesarean	male	2.5	female	2.6
320	2021-04-19 09:10:00	0	27	GnRH-antagonist	20.31	primary	tubal	4	IVF	5.84	6.58	2.56	24.35	10.49	2	2485	0.64	0.41	11.4	18	10	2021-04-22 10:42:33	1	1	0	1	intrauterine pregnancy		2021-12-31	38	vaginal	female	2.6
321	2021-04-19 09:20:17	0	32	GnRH-antagonist	20.03	primary	male	4	ICSI	NA	7.79	5.8	43.41	13.24	1	1503.38	0.41	0.19	10.7	16	7	2021-04-22 10:25:22	1	1	0	0
322	2021-04-21 08:47:51	0	35	GnRH-antagonist	19.22	secondary	tubal	2	IVF	2.7	7.1	3.46	38.48	13.53	1	1701.1	1.36	0.27	9.6	12	3	2021-04-24 11:30:18	2	1	0	1	intrauterine pregnancy		2022-01-08	39	vaginal	female	3.05
323	2021-04-21 09:00:39	0	27	GnRH-antagonist	17.31	primary	tubal	5	IVF	1.42	6.12	3.61	30.59	11.65	1	512.98	0.98	0.26	10.6	6	5	2021-04-24 11:43:37	1	1	0	0
324	2021-04-21 09:15:34	0	31	GnRH-antagonist	22.03	primary	tubal	6	IVF	2.46	6.13	3.89	48.4	9.24	1	1795.57	0.99	0.24	10.2	9	6	2021-04-24 11:55:21	2	2	0	1	intrauterine pregnancy		2022-01-14	40	vaginal	male	3.45
325	2021-04-21 09:40:09	0	27	GnRH-antagonist	30.41	primary	Ovulatory	5	IVF	5.52	3.03	3.09	64.93	10.21	2	2483.04	1.42	0.54	13.6	12	3	2021-04-24 11:35:11	2	2	0	1	intrauterine pregnancy		2021-12-31	38	Cesarean	male	2.8	female	2.8
326	2021-04-23 08:55:31	0	30	GnRH-antagonist	18.75	secondary	tubal	4	IVF	3.66	5.98	4.89	41.17	11.96	2	2434.66	1.46	0.5	11.6	11	7	2021-04-26 10:25:48	2	2	1	1	intrauterine pregnancy		2021-12-26	37	Cesarean	female	2.05	male	2.15
327	2021-04-24 08:40:28	0	38	GnRH-antagonist	20.08	secondary	male	1	ICSI	2.32	4.74	2.26	49.59	17.56	1	1206.53	3.69	0.52	9.9	3	3	2021-04-27 11:45:33	1	1	0	1		yes
328	2021-04-24 10:00:14	0	32	GnRH-antagonist	22.35	primary	male	2	IVF	3.48	6.49	4.85	24.67	15.7	2	2490	1.48	0.45	9.8	13	5	2021-04-27 11:35:05	1	1	0	1	intrauterine pregnancy		2021-12-25	37	Cesarean	female	2.7
329	2021-04-25 09:05:26	0	42	GnRH-antagonist	22.43	secondary	male	10	ICSI	1.73	7.03	0.95	28.71	14.35	1	1586.08	1.19	0.8	9.5	9	4	2021-04-28 11:50:23	2	2	0	0
330	2021-04-26 09:05:27	≥3	46	GnRH-antagonist	22.04	secondary	Unexplained	4	IVF	0.733	10.57	4.39	28	14	2	2107.23	2.97	0.24	12.8	7	2	2021-04-29 10:20:42	2	1	0	0
331	2021-04-27 09:35:03	0	33	GnRH-antagonist	18.66	secondary	tubal	2	IVF	3.42	4.4	5.68	30.72	16.08	2	2460.49	2.75	0.69	9	12	7	2021-04-30 11:10:10	1	1	0	1	intrauterine pregnancy		2022-01-21	40	Cesarean	female	3
332	2021-04-28 09:15:55	0	31	GnRH-antagonist	19.53	primary	Unexplained	6	IVF	1.17	8.44	7.04	53.93	18.88	3	3109.01	2.81	0.6	13.5	7	3	2021-05-01 09:40:52	2	1	0	1	intrauterine pregnancy		2022-01-03	37	vaginal	female	2.66
333	2021-04-29 08:45:05	1-2	26	GnRH-antagonist	22.89	primary	male	3	ICSI	1.1	7	1.62	50	18.96	1	660.42	1.95	0.36	11.1	3	1	2021-05-02 10:45:24	1	1	0	0
334	2021-04-29 08:50:52	0	35	GnRH-antagonist	19.53	primary	Unexplained	2	IVF	1.96	6.89	7.06	37.87	11.55	1	1664.1	2.48	0.33	8.1	9	4	2021-05-02 10:55:38	2	1	0	1	intrauterine pregnancy		2022-01-25	40	Cesarean	male	3.35
335	2021-04-29 09:10:46	0	28	GnRH-antagonist	22.64	primary	tubal	2	IVF	4.03	7.03	5.45	30.67	10.14	3	3205.33	4.75	0.8	12.3	14	11	2021-05-02 10:40:58	2	2	0	0
336	2021-04-30 09:15:00	1-2	31	GnRH-antagonist	23.44	primary	tubal	2	IVF	10.27	6.83	6.56	8	10.47	4	4038	3.17	0.45	12	16	9	2021-05-03 10:15:45	2	2	0	0
337	2021-05-02 09:35:55	0	29	GnRH-antagonist	21.76	primary	Unexplained	2	IVF	2.23	5.58	2.56	69.2	18.95	2	2203.52	3.03	0.74	9.5	14	6	2021-05-05 11:42:36	2	1	0	1	intrauterine pregnancy		2022-01-22	39	vaginal	female	3.05
338	2021-05-05 09:00:13	0	31	GnRH-antagonist	21.4	secondary	tubal	1	IVF	5.31	5.88	5.36	36.58	13.56	2	2934	3.46	0.31	10.9	14	9	2021-05-08 11:10:20	1	1	0	0
339	2021-05-05 09:10:24	0	32	GnRH-antagonist	22.48	primary	Unexplained	2	IVF	4.8	8.82	5.38	64	10.97	2	2028.02	2.26	0.47	10.5	10	5	2021-05-08 10:10:14	2	2	0	1	intrauterine pregnancy		2022-01-30	40	Cesarean	female	2	female	1.9
340	2021-05-05 09:28:24	0	31	GnRH-antagonist	22.67	secondary	tubal	3	IVF	2.62	9.48	5.52	11.28	12.06	1	1000	0.78	0.1	9.8	7	3	2021-05-08 10:05:15	1	1	0	1	intrauterine pregnancy		2022-01-20	39	Cesarean	male	3.2
341	2021-05-05 09:30:58	0	25	GnRH-antagonist	22.04	secondary	Unexplained	3	IVF	1.44	8.02	5.87	34.98	12.21	2	2829.37	2.4	0.57	15.6	10	2	2021-05-08 11:04:58	2	1	0	1	intrauterine pregnancy		2022-01-29	40	vaginal	female	2.94
342	2021-05-08 08:38:02	0	34	GnRH-antagonist	24.03	secondary	DOR	4	IVF	0.27	11.42	4.68	24.58	15.4	1	401.9	7.74	0.3	8.5	3	3	2021-05-11 11:10:11	2	1	0	1	intrauterine pregnancy		2022-01-19	38	Cesarean	male	3.36
343	2021-05-09 09:10:06	0	27	GnRH-antagonist	22.43	secondary	tubal	1	IVF	3.12	9.62	4.03	16.24	14.7	1	1246	1.38	0.25	14.9	4	2	2021-05-12 11:00:46	1	1	0	0
344	2021-05-09 09:30:24	0	30	GnRH-antagonist	23.14	primary	Unexplained	1	IVF	1.14	7.96	2.65	31	16.65	1	975.21	0.8	0.17	12.7	9	7	2021-05-12 10:10:51	1	1	0	1	intrauterine pregnancy		2022-02-05	40	vaginal	male	3.5
345	2021-05-10 08:45:38	0	42	GnRH-antagonist	25.15	primary	Unexplained	2	IVF	1.11	8.81	5.85	33.79	20.26	1	965.6	4.85	0.74	10.9	4	2	2021-05-13 11:05:35	2	2	0	1	intrauterine pregnancy		2022-01-30	39	Cesarean	female	3.75
346	2021-05-10 09:00:22	0	37	GnRH-antagonist	19.63	primary	Unexplained	1	IVF	5.82	8.69	8.61	45.85	12.57	2	2139.09	0.65	0.48	12.8	13	6	2021-05-13 10:15:28	2	2	0	1	intrauterine pregnancy		2021-11-27	30	Cesarean	female	1.55
347	2021-05-10 09:12:58	1-2	31	GnRH-antagonist	21.5	secondary	tubal	5	IVF	1.44	5.37	2	33.47	21.41	2	2303.97	1.28	0.76	9.8	17	6	2021-05-13 10:43:08	2	2	0	1	intrauterine pregnancy		2022-01-13	37	Cesarean	female	2.25	male	2.45
348	2021-05-11 08:40:56	0	29	GnRH-antagonist	19.53	primary	Unexplained	5	IVF	2.93	6.19	4.55	50.12	9.06	1	1900	1.26	0.38	10.3	10	3	2021-05-14 11:18:07	1	1	0	1	intrauterine pregnancy		2022-01-22	38	Cesarean	male	2.8
349	2021-05-12 08:50:00	0	30	GnRH-antagonist	19.96	secondary	Unexplained	4	IVF	3.55	10.15	8.69	64.94	13.67	2	2604	1.95	0.19	11.2	11	6	2021-05-15 11:45:36	1	1	0	0
350	2021-05-17 08:00:07	≥3	43	GnRH-antagonist	23.12	secondary	Endometriosis	2	IVF	1.29	10.35	8.2	32.28	22.03	1	611.41	23.2	0.6	6.9	3	2	2021-05-20 15:45:06	2	2	0	0
351	2021-05-19 09:17:55	1-2	41	GnRH-antagonist	23.12	secondary	tubal	7	IVF	1.05	2.52	6.78	25.85	15.07	1	1382.98	2.15	0.47	12.3	4	3	2021-05-22 11:35:03	2	1	0	1	intrauterine pregnancy	yes
352	2021-05-20 09:00:39	0	28	GnRH-antagonist	26.56	secondary	Ovulatory	3	IVF	5.78	6.31	2.67	22.04	9.54	1	1975.38	2.73	0.55	15.5	16	9	2021-05-23 10:50:59	2	2	0	1	intrauterine pregnancy		2022-02-05	39	Cesarean	male	3.75
353	2021-05-20 09:10:25	0	31	GnRH-antagonist	19.23	primary	DOR	3	IVF	0.43	15.48	8.81	61.12	21.55	1	1604.32	3.96	0.38	8.6	3	3	2021-05-23 11:00:58	2	1	0	1	intrauterine pregnancy		2022-02-07	39	vaginal	female	2.84
354	2021-05-20 09:45:01	1-2	29	GnRH-antagonist	17.26	primary	Unexplained	2	IVF	2.53	5.44	8.09	53.19	19.86	3	3070.66	1.11	0.56	10.6	11	7	2021-05-23 11:10:58	2	2	0	1	intrauterine pregnancy		2022-02-15	40	Cesarean	male	3.25
355	2021-05-25 08:30:04	0	45	GnRH-antagonist	22.67	primary	tubal	2	IVF	1.51	10.02	4.63	28.78	22.45	1	1260.66	5.07	0.38	9.4	3	1	2021-05-28 11:30:11	1	1	0	0
356	2021-05-25 08:40:08	0	31	GnRH-antagonist	20.83	secondary	tubal	3	IVF	0.69	6.72	1.68	16.54	27.44	1	1355.36	2.26	0.29	11	5	3	2021-05-28 11:33:18	1	1	0	0
357	2021-05-27 08:52:43	0	43	GnRH-antagonist	25.98	secondary	Mixed	1	IVF	0.18	9.98	4.77	43.29	17.19	1	460.87	2.42	0.21	11.2	3	1	2021-05-30 11:35:18	1	1	0	0
358	2021-05-27 09:30:38	0	35	GnRH-antagonist	20.2	secondary	DOR	4	IVF	0.71	9.92	4.76	55.04	20.56	1	978.45	3.93	0.3	12.8	10	3	2021-05-30 11:40:58	2	1	0	1	intrauterine pregnancy		2022-02-07	38	Cesarean	female	3.15
359	2021-05-29 08:40:23	0	40	GnRH-antagonist	23.92	secondary	DOR	4	IVF	1	10.35	5.49	23.52	16.8	1	801.6	1.4	0.38	11.8	6	4	2021-06-01 10:35:40	2	2	0	1	intrauterine pregnancy		2022-02-18	39	vaginal	female	3.3
360	2021-05-29 09:20:34	0	37	GnRH-antagonist	21.57	secondary	tubal	4	IVF	4.49	7.23	6.32	48.17	13.68	1	1924.31	4.78	0.51	10	6	5	2021-06-01 11:30:13	1	1	0	1	intrauterine pregnancy		2022-01-28	36	Cesarean	male	2.9	male	2.7
361	2021-05-31 08:35:17	1-2	35	GnRH-antagonist	20.2	primary	Endometriosis	10	IVF	1.15	5.92	4.72	35.35	17.27	1	1376.26	1.21	0.23	8.3	5	4	2021-06-03 10:45:16	1	1	0	1	intrauterine pregnancy		2022-02-18	39	Cesarean	female	3.25
362	2021-05-31 08:50:33	0	39	GnRH-antagonist	22.72	secondary	tubal	14	IVF	4.03	6.96	2.47	33.75	10.26	1	1094.35	1.23	0.15	10.8	8	5	2021-06-03 10:30:35	1	1	0	0
363	2021-05-31 09:10:49	0	38	GnRH-antagonist	22.58	primary	tubal	11	IVF	10.54	4.27	7.09	57.52	9.68	3	3450.25	3.5	0.64	11.3	11	5	2021-06-03 11:26:16	2	1	0	1	intrauterine pregnancy		2022-02-11	38	vaginal	male	3.6
364	2021-06-01 08:40:46	0	27	GnRH-antagonist	18.83	secondary	Endometriosis	2	IVF	4.64	8.27	4.34	40.32	13	3	3782.9	1.55	1.57	10.5	11	10	2021-06-04 10:55:16	1	1	0	1	intrauterine pregnancy		2022-03-05	41	Cesarean	female	3.24
365	2021-06-01 08:45:55	≥3	44	GnRH-antagonist	22.03	secondary	tubal	1	IVF	1.06	6.34	3.22	31.28	19.02	1	1887.14	0.97	0.6	12.1	7	4	2021-06-04 11:15:48	2	1	0	1	intrauterine pregnancy	yes
366	2021-06-01 09:51:00	0	32	GnRH-antagonist	21.63	primary	tubal	3	IVF	3.61	5.32	5.31	34.6	13.32	3	3457.39	2.81	1.01	10.2	12	5	2021-06-04 11:05:20	1	1	0	1	intrauterine pregnancy		2022-02-11	38	Cesarean	female	2.55
367	2021-06-02 09:35:49	0	32	GnRH-antagonist	21.57	primary	Mixed	5	ICSI	7.98	6.3	5.88	28.67	13.9	2	2190	3.79	0.58	9.2	13	3	2021-06-05 10:20:43	2	1	0	0
368	2021-06-03 08:40:17	0	29	GnRH-antagonist	NA	secondary	tubal	3	IVF	2.84	6.81	5.94	61.23	16.65	2	2447.71	0.89	1.14	9.8	16	8	2021-06-06 11:45:58	2	2	0	0
369	2021-06-04 09:35:44	0	26	GnRH-antagonist	18.77	secondary	tubal	1	IVF	4.41	5.52	3.7	28.76	13.21	1	1832.69	1.15	0.5	9.3	13	4	2021-06-07 11:00:19	1	1	0	0
370	2021-06-08 09:10:56	0	31	GnRH-antagonist	20.32	primary	DOR	2	IVF	1.01	10.05	5.97	44.83	17.5	1	1086.27	1.5	0.2	13.2	4	2	2021-06-11 11:15:34	2	1	0	1	intrauterine pregnancy		2022-02-10	37	Cesarean	female	2.6	female	2.5
371	2021-06-09 09:50:36	0	33	GnRH-antagonist	24.97	secondary	tubal	5	IVF	NA	7.35	6.56	45.85	15.8	1	1312	4.14	0.34	11.3	12	8	2021-06-12 10:45:34	2	1	0	1	intrauterine pregnancy		2022-02-23	39	Cesarean	male	2.75
372	2021-06-10 08:45:17	0	46	GnRH-antagonist	26.35	secondary	DOR	1	IVF	0.645	7.27	1.21	28.31	10.44	1	268.63	0.45	0.11	10.8	5	4	2021-06-13 11:05:42	2	1	0	0
373	2021-06-10 09:40:45	0	31	GnRH-antagonist	20.81	primary	Mixed	5	ICSI	3.38	7.99	3.93	48.73	15.28	3	3078.92	4.4	0.88	8.9	15	5	2021-06-13 10:55:34	1	1	0	0
374	2021-06-12 09:30:05	0	26	GnRH-antagonist	16.06	primary	tubal	5	IVF	2.67	7.28	5.71	41.83	16.57	3	3660.36	3.09	1.09	13.7	13	9	2021-06-15 11:00:47	1	1	0	0
375	2021-06-13 08:45:14	0	37	GnRH-antagonist	20.96	secondary	tubal	1	IVF	3.69	6.04	2.02	34.3	14.02	1	703.63	1.12	0.3	11	3	2	2021-06-16 11:25:46	1	1	0	0
376	2021-06-15 08:30:34	1-2	30	GnRH-antagonist	22.46	primary	Unexplained	5	IVF	1.8	6.71	5.03	21.25	22.94	1	530.58	3.12	0.59	12.3	5	3	2021-06-18 11:15:14	2	1	0	0
377	2021-06-19 08:35:28	≥3	41	GnRH-antagonist	22.04	secondary	tubal	3	IVF	NA	7.25	5.29	43.83	19.22	1	1144.62	3.15	0.37	11.2	4	2	2021-06-22 11:15:20	2	2	0	0
378	2021-06-19 08:50:56	0	34	GnRH-antagonist	19.82	secondary	tubal	6	IVF	0.83	10.7	5.22	21.1	14.71	1	1307.35	2.15	0.7	9.4	2	1	2021-06-22 10:25:22	1	1	0	0
379	2021-06-19 09:10:57	0	37	GnRH-antagonist	22.89	secondary	tubal	6	IVF	3.02	4.17	3.34	25.61	12.01	1	1320	1	0.18	9.6	7	5	2021-06-22 10:40:58	2	2	0	0
380	2021-06-21 09:05:12	0	35	GnRH-antagonist	29.9	secondary	tubal	11	IVF	5.81	4.77	6.59	69.27	8.63	3	3010	3.53	0.87	11.3	14	6	2021-06-24 11:55:10	1	1	0	0
381	2021-06-26 09:05:11	0	28	GnRH-antagonist	20.83	primary	tubal	2	IVF	1.84	6.66	4.18	28.66	15.87	1	1635.45	9.11	0.35	11.1	7	4	2021-06-29 10:50:08	1	1	0	1	intrauterine pregnancy		2022-03-22	40	vaginal	female	3
382	2021-06-26 09:15:58	0	28	GnRH-antagonist	26.62	primary	Mixed	4	ICSI	2.45	4.77	3.78	25	12.19	1	1252	5.51	0.45	11.2	6	3	2021-06-29 10:20:04	2	1	0	1	intrauterine pregnancy		2022-03-02	37	Cesarean	female	2.55
383	2021-06-26 09:25:26	1-2	33	GnRH-antagonist	21.79	primary	Endometriosis	3	ICSI	0.396	5.27	4.5	20.38	20.46	1	1196.7	3.8	0.51	11.6	4	2	2021-06-29 11:00:34	1	1	0	0
384	2021-06-27 09:10:05	1-2	33	GnRH-antagonist	22.48	primary	male	2	ICSI	1.87	5.83	2.42	35.48	18.93	1	1482.29	0.77	0.61	13.7	11	5	2021-06-30 11:15:15	1	1	0	0
385	2021-06-29 08:55:36	1-2	40	GnRH-antagonist	19.31	secondary	tubal	3	IVF	1.3	8.98	3.81	68.18	20.77	1	1277.61	1.42	0.36	6.5	7	7	2021-07-02 10:55:31	2	2	0	0
386	2021-07-04 08:50:52	0	25	GnRH-antagonist	22.96	secondary	tubal	1	IVF	9.47	5.51	2.08	11.58	7.39	1	933.93	1.06	0.13	11.5	4	3	2021-07-07 11:00:57	2	1	0	0
387	2021-07-05 09:00:12	0	36	GnRH-antagonist	21.51	secondary	tubal	1	IVF	1.73	8.03	3.08	24.79	24.33	1	1022.15	7.22	0.83	9	7	3	2021-07-08 10:01:43	2	1	0	0
388	2021-07-07 09:05:47	0	31	GnRH-antagonist	21.64	primary	Unexplained	5	IVF	3.77	6.06	2.45	29.91	10.14	2	2231.3	2.26	0.38	8.1	10	4	2021-07-10 11:35:23	2	2	0	1	intrauterine pregnancy		2022-03-28	39	vaginal	male	2.88
389	2021-07-07 09:20:07	0	25	GnRH-antagonist	21.48	secondary	tubal	1	IVF	4.26	5.06	3.36	39.53	9.4	2	2931	4.31	0.4	12.5	16	6	2021-07-10 11:10:40	2	2	0	1	intrauterine pregnancy	yes
390	2021-07-08 09:00:48	0	32	GnRH-antagonist	27.06	secondary	male	3	ICSI	2.83	6.12	2.73	21.08	13.26	1	1488.46	2.44	0.28	11.3	13	4	2021-07-11 10:40:36	2	1	0	0
391	2021-07-09 09:20:13	0	20	GnRH-antagonist	27.85	secondary	tubal	2	IVF	4.86	6.1	5.56	45.51	10.76	1	611.05	1.86	0.15	9.2	8	3	2021-07-12 10:18:35	2	1	0	1	intrauterine pregnancy		2022-03-31	39	vaginal	male	3.7
392	2021-07-10 08:40:22	0	33	GnRH-antagonist	24.44	secondary	DOR	1	IVF	0.93	10.09	3.52	10	19.59	1	246.38	2.13	0.15	8.8	2	2	2021-07-13 10:06:19	2	2	0	1	intrauterine pregnancy		2022-02-06	32	Cesarean	male	1.85
393	2021-07-10 08:50:12	0	27	GnRH-antagonist	20.82	secondary	DOR	3	IVF	0.72	9.65	5.28	15.72	15.8	1	476.63	1.55	0.31	9.7	4	3	2021-07-13 10:15:36	1	1	0	1	intrauterine pregnancy		2022-03-14	37	vaginal	male	2.45
394	2021-07-11 09:35:02	0	34	GnRH-antagonist	22.83	primary	tubal	3	IVF	1.58	3.34	3.05	56.2	16.42	4	4016.82	4.7	0.118	8	5	3	2021-07-14 11:50:33	1	1	0	0
395	2021-07-15 08:58:35	0	38	GnRH-antagonist	22.72	primary	tubal	2	IVF	0.45	7.04	5.86	39.24	16.59	1	833.25	2.61	0.23	10.4	6	4	2021-07-18 10:57:50	2	2	0	1	intrauterine pregnancy		2022-03-23	37	Cesarean	female	3.15
396	2021-07-17 09:00:05	0	36	GnRH-antagonist	24.03	secondary	tubal	6	IVF	2.64	6.87	3.23	39.85	13.13	1	1849.29	1.55	0.26	9.9	9	5	2021-07-20 10:20:03	2	2	0	0
397	2021-07-17 09:40:28	0	36	GnRH-antagonist	25.89	primary	Mixed	10	IVF	12.47	5.6	13.85	31.78	8.83	3	3140	6.94	0.34	10.4	10	8	2021-07-20 10:10:24	2	1	0	0
398	2021-07-18 09:35:45	0	35	GnRH-antagonist	22.85	secondary	Unexplained	1	IVF	1.3	5.13	3.05	49.26	10.8	1	1385.78	1.75	0.15	14	6	5	2021-07-21 11:10:05	2	2	0	1	intrauterine pregnancy		2022-03-05	34	vaginal	female	2.1
399	2021-07-18 09:55:28	0	30	GnRH-antagonist	23.03	secondary	DOR	1	IVF	0.92	10.21	3.18	17.3	15.24	1	1191.54	1.37	0.49	11.6	7	4	2021-07-21 10:55:28	2	2	0	1	intrauterine pregnancy		2022-04-09	39	vaginal	female	3.35
400	2021-07-23 08:50:18	0	35	GnRH-antagonist	24.84	primary	Endometriosis	5	IVF	1.32	5.45	2.34	59.45	21.49	1	1886.59	3.31	0.55	10.6	9	5	2021-07-26 11:40:51	1	1	0	0
401	2021-07-24 08:50:05	1-2	33	GnRH-antagonist	21.91	secondary	male	12	ICSI	0.89	4.3	2.33	19.88	17.35	1	607.15	3.94	0.26	8.5	5	4	2021-07-27 10:10:02	2	1	0	0
402	2021-07-24 09:25:34	0	29	GnRH-antagonist	29.14	secondary	tubal	4	IVF	3.64	5.57	1.44	30.28	15.78	1	1534.1	4.09	0.48	12	7	5	2021-07-27 11:00:40	1	1	0	0
403	2021-07-29 09:45:30	0	29	GnRH-antagonist	20.32	primary	male	2	IVF	2.78	5.74	4.53	50.65	11.9	3	3890.83	3.41	0.63	9.3	19	8	2021-08-01 11:00:25	1	1	0	1	intrauterine pregnancy		2022-04-13	38	vaginal	male	3.37
404	2021-07-30 08:50:38	0	27	GnRH-antagonist	19.68	primary	tubal	2	IVF	1.879	6.44	4.04	29.01	16.15	1	1258.28	1.46	0.25	14.7	11	6	2021-08-02 10:43:05	2	2	0	1	intrauterine pregnancy		2022-04-11	38	vaginal	female	2.85
405	2021-07-30 08:50:50	0	28	GnRH-antagonist	22.15	primary	male	4	IVF	2.6	8.47	3.83	73	15.9	1	898.56	0.97	0.39	10.5	7	5	2021-08-02 11:35:15	2	2	0	1	intrauterine pregnancy		2022-04-30	41	vaginal	female	3.53
406	2015-09-28 09:50	1-2	25	GnRH-antagonist	18.37	secondary	Mixed	2	ICSI	NA	6.28	7.75	31.82	22.68	3	3891	2.35	0.85	11	13	7	2015-10-01	2	2	0	1	intrauterine pregnancy		2016-06-20	39	vaginal	male	4.1
407	2015-11-03 09:40	1-2	34	GnRH-antagonist	19.72	secondary	Ovulatory	2	IVF	NA	5.56	2.53	31.11	24.2	1	854.3	3.56	0.403	8	5	5	2015-11-06	2	1	0	1	intrauterine pregnancy		2016-07-19	38	vaginal	female	3.35
408	2015-11-11 09:50	0	34	GnRH-antagonist	18.56	secondary	Mixed	11	IVF	NA	14.31	7.61	67.99	21.28	1	1423	6.75	1.32	4.6	4	2	2015-11-14	2	2	0	0			- -
409	2015-11-18 09:25	0	28	GnRH-antagonist	20.51	primary	tubal	3	IVF	NA	6.49	5.9	41.1	11.77	1	1056	4.57	0.689	10	3	2	2015-11-21	2	1	0	1	intrauterine pregnancy		2016-08-17	39	vaginal	male	3.45
410	2015-11-19 09:20	0	45	GnRH-antagonist	18.59	secondary	Ovulatory	6	IVF	NA	7.07	3.44	77.34	12.24	1	1379	5.56	1.01	8.4	3	3	2015-11-22	2	2	0	0			- -
411	2015-12-22 09:25	1-2	29	GnRH-antagonist	27.58	primary	male	3	IVF	NA	6.2	4.45	37.64	10	1	1648	2.44	0.751	9.9	10	6	2015-12-25	2	2	0	1	intrauterine pregnancy		2016-09-05	39	vaginal	male	3.5
412	2016-01-04 09:20	1-2	43	GnRH-antagonist	23.8	secondary	tubal	6	IVF	NA	12.23	6.22	54.06	9.22	1	448.4	1.26	1.26	7.9	2	2	2016-01-07	2	2	0	0			- -
413	2016-01-04 09:40	1-2	25	GnRH-antagonist	21.03	primary	tubal	3	IVF	NA	4.23	3.3	57.46	9.31	2	2510	3.22	0.655	12	9	6	2016-01-07	2	2	0	0			- -
414	2016-01-09 09:45	0	33	GnRH-antagonist	19.9	secondary	tubal	1	IVF	NA	9.75	8.7	30.32	20.13	1	1527	8.34	1.25	11.6	4	4	2016-01-12	2	2	0	1	intrauterine pregnancy		2016-09-29	39	vaginal	female	2.95
415	2016-01-12 09:28	1-2	45	GnRH-antagonist	18.59	secondary	Ovulatory	6	IVF	NA	5.73	3.44	77.34	15.93	1	841.7	6.65	1.13	9.2	4	3	2016-01-15	2	2	0	0			- -
416	2016-01-13 09:08	1-2	37	GnRH-antagonist	21.26	primary	male	10	IVF	NA	4.39	5.1	15.29	13.46	2	2099	2.11	0.985	11.7	7	6	2016-01-16	2	2	0	0			- -
417	2016-01-15 09:25	0	35	GnRH-antagonist	18.44	secondary	tubal	1	IVF	NA	5.61	3.36	35.42	17.8	1	1634	3.8	0.924	8.9	6	4	2016-01-18	2	2	0	1	intrauterine pregnancy	yes	- -
418	2016-01-17 09:40	0	39	GnRH-antagonist	19.88	secondary	tubal	5	IVF	NA	6.78	4.82	14.63	18.18	1	908.1	14.6	0.76	14	2	2	2016-01-20	2	2	0	1	intrauterine pregnancy	yes	- -
419	2016-02-24 09:38	1-2	35	GnRH-antagonist	22.49	secondary	male	2	ICSI	NA	7.3	3.76	33.64	10.28	1	1744	5.88	0.515	12	7	6	2016-02-27	2	2	0	1	intrauterine pregnancy		2016-11-10	39	Cesarean	male	3.45
420	2016-02-26 09:56	0	32	GnRH-antagonist	22.58	secondary	tubal	2	IVF	NA	4.17	4.97	12.44	13.96	2	2339	4.13	0.988	10	13	2	2016-02-29	2	2	0	0			- -
421	2016-02-27 09:25	0	40	GnRH-antagonist	22.94	primary	Endometriosis	5	IVF	NA	11.58	9.3	73.33	18.93	1	1143	14.35	0.622	6.8	2	1	2016-03-01	1	1	0	0			- -
422	2016-02-27 09:35	1-2	44	GnRH-antagonist	24.46	secondary	tubal	5	IVF	NA	5.59	4.76	28.03	8.48	2	2117	6.61	0.763	12	11	8	2016-03-01	2	2	0	0			- -
423	2016-03-03 09:00	0	30	GnRH-antagonist	21.08	primary	male	2	ICSI	NA	5.48	6.73	30.23	9.33	4	4470	5.03	0.709	10.3	16	2	2016-03-06	2	2	0	0			- -
424	2016-03-07 09:21	0	42	GnRH-antagonist	27.12	secondary	Endometriosis	5	IVF	NA	7.26	6.4	12.38	13.52	1	473	2.1	0.269	10.4	2	1	2016-03-10	1	1	0	0			- -
425	2016-03-19 09:20	≥3	39	GnRH-antagonist	19.2	primary	tubal	11	IVF	NA	9.07	5.26	25.82	12.34	1	579.3	1.68	0.234	8.5	2	1	2016-03-22	1	1	0	0			- -
426	2016-03-25 09:20	0	29	GnRH-antagonist	20.08	secondary	tubal	1	IVF	NA	6.05	5.29	33.49	13.05	2	2039	2	0.667	9.5	7	5	2016-03-28	2	2	0	1	intrauterine pregnancy		2016-11-18	35	Cesarean	male	2.7	female	2.1
427	2016-04-07 08:50	0	34	GnRH-antagonist	18.83	primary	male	1	ICSI	NA	7.34	5.17	28.46	7.44	4	4123	1.53	0.482	12.6	18	4	2016-04-10	2	2	0	1	intrauterine pregnancy		2016-12-26	39	Cesarean	male	2.85
428	2016-04-13 09:00	1-2	33	GnRH-antagonist	20.2	primary	Mixed	5	IVF	NA	5.23	5.11	50.92	12.06	3	3446	2.5	1.39	11	10	4	2016-04-16	2	2	0	0			- -
429	2016-04-22 10:00	0	26	GnRH-antagonist	19.1	secondary	tubal	1	IVF	NA	9.19	8.7	7.01	13.07	2	2713	1.38	0.379	9	17	4	2016-04-25	2	2	0	1	intrauterine pregnancy		2017-01-14	39	vaginal	female	3.5
430	2016-04-23 09:30	0	35	GnRH-antagonist	23.42	secondary	tubal	3	IVF	NA	9.31	3.22	9.19	12.57	1	1390	1.03	0.453	8.7	5	4	2016-04-26	2	2	0	0			- -
431	2016-04-26 08:50	1-2	32	GnRH-antagonist	18.73	secondary	tubal	10	IVF	NA	5.91	6.65	37.18	11.99	4	4342	7.67	1.04	8.3	13	6	2016-04-29	2	2	0	1	intrauterine pregnancy		2016-12-11	34	Cesarean	female	2.14
432	2016-05-04 09:25	0	28	GnRH-antagonist	25.15	primary	tubal	6	IVF	NA	4.78	5.61	23.46	9.21	2	2035	1.32	0.914	10.8	10	2	2016-05-07	2	2	0	1	intrauterine pregnancy		2017-01-30	36	Cesarean	male	2.6	female	2.4
433	2016-05-05 09:40	1-2	34	GnRH-antagonist	20.03	secondary	tubal	2	IVF	NA	6.93	4	17.58	12.48	1	1944	1.85	1.14	13.8	20	4	2016-05-08	2	1	0	0			- -
434	2016-05-12 09:18	1-2	33	GnRH-antagonist	27.58	secondary	male	1	IVF	NA	6.41	2.23	18.27	9.91	1	1436	4.12	0.774	11.5	5	2	2016-05-15	2	2	0	0			- -
435	2016-05-13 08:45	0	31	GnRH-antagonist	21.23	primary	Mixed	4	IVF	NA	5.95	3.65	61.52	17.61	3	3252	4	1.02	11.2	8	4	2016-05-16	2	2	0	1	intrauterine pregnancy		2017-01-23	38	Cesarean	female	2.45
436	2016-05-14 09:30	1-2	38	GnRH-antagonist	20.31	secondary	tubal	7	IVF	NA	7.53	5.85	42.89	19.96	2	2607	2.16	0.694	11.7	9	4	2016-05-17	2	2	0	1	intrauterine pregnancy	yes	- -
437	2016-05-15 09:25	0	37	GnRH-antagonist	23.5	secondary	tubal	8	IVF	NA	13.8	5.1	25	18.23	1	711.3	6.3	0.326	8.2	2	2	2016-05-18	2	1	0	0			- -
438	2016-05-16 08:40	≥3	42	GnRH-antagonist	21.37	secondary	Unexplained	0	IVF	NA	5.77	3.76	85	18.57	2	2962	5.25	1.24	9.1	14	4	2016-05-19	2	2	0	0			- -
439	2016-05-20 09:25	≥3	44	GnRH-antagonist	22.03	secondary	Mixed	1	IVF	NA	10.86	7	4	12.42	1	482	1.87	0.386	8.8	4	3	2016-05-23	2	2	0	0			- -
440	2016-05-23 08:50	0	42	GnRH-antagonist	22.43	secondary	tubal	3	IVF	NA	12.37	6.7	44.42	14.42	1	1060	6.2	0.91	12	3	3	2016-05-26	2	1	0	0			- -
441	2016-05-28 09:35	0	27	GnRH-antagonist	19.05	secondary	tubal	1	IVF	NA	5.57	5.06	40.27	13.29	4	4336	2.41	1.32	6.8	12	5	2016-05-31	2	2	0	0			- -
442	2016-05-29 09:00	0	30	GnRH-antagonist	22.85	primary	male	3	ICSI	NA	7	4.58	40.36	11.42	2	2977	1.2	0.64	12.1	11	6	2016-06-01	2	2	0	1	intrauterine pregnancy		2017-02-15	38	vaginal	male	3
443	2016-05-31 08:45	0	42	GnRH-antagonist	20.44	secondary	tubal	2	IVF	NA	5.26	1.4	78	23.44	1	727.6	9.13	0.681	7	2	2	2016-06-03	2	1	0	0			- -
444	2016-05-31 09:06	0	21	GnRH-antagonist	15.42	primary	male	1	ICSI	NA	6.41	7.74	39.74	10.26	2	2932	3.37	0.327	8.8	15	4	2016-06-03	2	2	0	0			- -
445	2016-06-06 09:00	1-2	45	GnRH-antagonist	20.4	secondary	Mixed	1	ICSI	NA	9.53	8.52	57	12.7	1	1775	3.53	0.629	12.9	7	6	2016-06-09	2	2	0	0			- -
446	2016-06-12 08:40	0	31	GnRH-antagonist	18.59	secondary	Mixed	1	IVF	NA	4.54	4.81	23.04	11.27	2	2697	2.51	1.04	11.3	16	2	2016-06-15	2	2	0	1	intrauterine pregnancy		2017-02-17	37	Cesarean	male	3.25
447	2016-06-16 09:45	0	41	GnRH-antagonist	23.53	secondary	tubal	3	IVF	NA	7.56	3.77	30.75	17.19	1	1760	3.05	1.19	7.4	17	4	2016-06-19	2	2	0	0			- -
448	2016-06-16 10:25	0	35	GnRH-antagonist	22.72	secondary	Mixed	2	ICSI	NA	12.29	7	74	12.24	1	1527	2.2	1.13	10.7	7	2	2016-06-19	2	1	0	1	intrauterine pregnancy		2017-03-02	38	Cesarean	female	2.65
449	2016-06-16 10:45	0	41	GnRH-antagonist	21.94	secondary	tubal	3	IVF	NA	6.27	6.79	102	15.27	1	1816	4.02	0.861	7.8	5	3	2016-06-19	2	2	0	0			- -
450	2016-06-16 11:05	0	32	GnRH-antagonist	19.2	primary	Endometriosis	4	IVF	NA	8.49	5.6	39.68	10.98	2	2337	0.929	0.276	10.6	9	4	2016-06-19	2	2	0	1	intrauterine pregnancy		2017-03-02	39	vaginal
451	2016-06-18 09:50	0	45	GnRH-antagonist	23.51	secondary	tubal	3	IVF	NA	13.15	6.33	32.62	16.08	1	1380	6.14	1.12	9.2	8	5	2016-06-19	2	2	0	0			- -
452	2016-06-28 08:45	0	30	GnRH-antagonist	24.65	secondary	tubal	2	IVF	NA	7.5	3.67	28.73	12.29	3	3596	2.96	1.08	12.7	16	6	2016-07-01	2	2	0	1	intrauterine pregnancy	yes	- -
453	2016-06-28 09:40	1-2	34	GnRH-antagonist	19.31	primary	tubal	6	IVF	NA	6.49	8.74	24.04	29.25	2	2802	7.92	0.837	10.8	10	2	2016-07-01	2	1	0	0			- -
454	2016-06-30 08:40	0	41	GnRH-antagonist	25.64	secondary	tubal	1	IVF	NA	9.72	3.94	36.7	7.81	1	1193	3.26	0.672	11	10	4	2016-07-03	2	1	0	1	intrauterine pregnancy		2017-03-09	37	Cesarean	female	2.65
455	2016-07-04 09:50	1-2	43	GnRH-antagonist	25.39	secondary	Mixed	1	IVF	NA	8.51	5.34	40.38	18.63	1	874.2	4.71	0.273	8.2	3	3	2016-07-07	2	2	0	0			- -
456	2016-07-05 09:45	0	34	GnRH-antagonist	24.44	primary	tubal	0	IVF	NA	8.16	4.24	18.22	13.79	1	1663	0.684	0.678	8.3	16	4	2016-07-08	2	2	0	1	intrauterine pregnancy		2017-03-13	37	Cesarean	female	3.55
457	2016-07-10 09:15	1-2	40	GnRH-antagonist	22.94	primary	Endometriosis	5	IVF	NA	11.58	9.3	73.33	11.84	1	1509	2.19	0.511	9.2	4	4	2016-07-13	2	2	0	1	intrauterine pregnancy	yes	- -
458	2016-07-11 08:45	1-2	29	GnRH-antagonist	16.94	secondary	male	2	IVF	NA	7.66	3.24	49.22	19.66	1	1525	6.44	1.14	7	5	3	2016-07-14	2	1	0	0			- -
459	2016-07-11 09:00	0	27	GnRH-antagonist	19.71	primary	male	1	IVF	NA	7.3	2.45	36.06	21.22	1	304.8	1.58	0.421	11.2	2	2	2016-07-14	2	1	0	1	intrauterine pregnancy		2017-04-09	40	vaginal	female	2.95
460	2016-07-11 09:35	1-2	39	GnRH-antagonist	19.91	secondary	tubal	1	ICSI	NA	6.69	3.98	24.52	17.24	2	2072	2.51	0.876	9.3	10	4	2016-07-14	2	1	0	0			- -
461	2016-07-12 09:30	0	27	GnRH-antagonist	19.22	primary	male	4	ICSI	NA	6.18	4.47	62.82	19.64	4	4760	3.48	0.9	8.8	12	7	2016-07-15	2	2	0	0			- -
462	2016-07-23 09:05	0	40	GnRH-antagonist	21.21	secondary	Mixed	5	IVF	NA	6.75	8.84	54.2	16.58	1	816.6	6.14	0.519	6.8	3	2	2016-07-26	2	1	0	0			- -
463	2016-07-24 10:00	0	32	GnRH-antagonist	20.7	secondary	Endometriosis	12	IVF	NA	6.14	4	55.78	10.49	1	1144	1.45	0.548	9	9	4	2016-07-27	2	2	0	0			- -
464	2016-07-26 09:15	0	44	GnRH-antagonist	27.77	secondary	Mixed	1	IVF	NA	8.12	5.04	38.16	15.87	1	1457	2.61	0.341	11.6	6	3	2016-07-29	2	1	0	1	intrauterine pregnancy	yes	- -
465	2016-07-29 08:50	0	32	GnRH-antagonist	18.43	primary	male	1	IVF	NA	16.34	7.76	30.52	29.01	1	1852	3.12	0.7	10.4	5	4	2016-08-01	2	1	0	0			- -
466	2016-07-31 09:05	0	37	GnRH-antagonist	21.63	secondary	Mixed	3	IVF	NA	7.24	6.36	69	16.77	1	710.2	6.58	1.04	8.7	3	3	2016-08-03	2	1	0	1	intrauterine pregnancy		2017-03-30	36	Cesarean	female	3.4	female	2.6
467	2016-08-01 09:25	0	31	GnRH-antagonist	19.78	secondary	tubal	1	IVF	NA	3.78	3.15	12.58	14.38	1	605.4	1.72	0.765	8.4	2	1	2016-08-04	1	1	0	0			- -
468	2016-08-03 09:15	1-2	43	GnRH-antagonist	26.64	secondary	Mixed	4	IVF	NA	8.81	3.07	24.4	19.74	1	557.6	6	0.847	NA	3	3	2016-08-06	2	1	0	0			- -
469	2016-08-07 09:50	0	40	GnRH-antagonist	23.06	secondary	tubal	1	IVF	NA	6.38	5.99	45.3	18.19	2	2214	3.54	0.619	9.7	9	4	2016-08-10	2	2	0	0			- -
470	2016-08-12 09:05	≥3	42	GnRH-antagonist	23.73	secondary	male	2	IVF	NA	3.45	1.48	24.09	12.82	1	1094	2.06	0.557	8.3	6	5	2016-08-15	2	1	0	0			- -
471	2016-08-13 09:05	0	25	GnRH-antagonist	26.04	primary	tubal	5	IVF	NA	6.18	4.21	25.55	17.9	2	2305	2.53	0.888	12.8	14	2	2016-08-16	2	2	0	0			- -
472	2016-08-13 09:20	0	29	GnRH-antagonist	16.49	primary	male	2	ICSI	NA	13.11	9.37	20.65	14.95	1	1184	2.39	0.297	10	8	2	2016-08-16	2	1	0	0			- -
473	2016-08-14 09:25	0	37	GnRH-antagonist	21.63	secondary	tubal	1	IVF	NA	4.62	3.7	38.71	8.91	2	2350	1.95	0.887	9.5	13	4	2016-08-17	2	2	0	1	intrauterine pregnancy		2017-04-15	37	vaginal	female	2.25
474	2016-08-16 09:25	0	21	GnRH-antagonist	17.63	primary	tubal	3	IVF	NA	4.39	3.76	66.54	7.89	2	2505	1.62	0.314	10.1	9	2	2016-08-19	2	2	0	0			- -
475	2016-08-19 09:00	1-2	45	GnRH-antagonist	26.49	secondary	tubal	5	IVF	NA	5.26	5.91	77	11.65	1	390.7	2.27	0.235	10	3	1	2016-08-22	1	1	0	0			- -
476	2016-08-19 09:15	0	30	GnRH-antagonist	26.56	secondary	tubal	1	IVF	NA	4.04	4.28	34.37	10.72	1	1691	10.23	0.93	9.4	14	4	2016-08-22	2	2	0	1	intrauterine pregnancy		2017-05-13	40	vaginal	female	2.85
477	2016-08-20 09:25	0	42	GnRH-antagonist	22.21	secondary	tubal	1	IVF	NA	7.02	3.78	35.62	21.89	2	2855	4.01	0.921	8.3	9	8	2016-08-23	2	2	0	1	intrauterine pregnancy	yes	- -
478	2016-08-21 09:30	0	37	GnRH-antagonist	20.34	secondary	tubal	1	IVF	NA	13.08	7.97	21.57	22.02	1	1760	2.91	0.324	10.7	8	2	2016-08-24	2	2	0	1	intrauterine pregnancy		2017-05-05	38	vaginal	female	2.84
479	2016-08-21 09:50	1-2	35	GnRH-antagonist	19.72	secondary	Endometriosis	1	IVF	NA	5.98	3.85	79.41	17.17	1	1294	3	0.69	11	3	2	2016-08-24	2	1	0	0			- -
480	2016-08-23 09:10	0	36	GnRH-antagonist	24.62	secondary	tubal	1	IVF	NA	7.01	3.07	48.1	11.8	2	2350	2.93	0.949	14.7	10	4	2016-08-26	2	2	0	0			- -
481	2016-08-24 08:35	1-2	31	GnRH-antagonist	21.26	secondary	tubal	2	IVF	NA	8.62	5.98	41.11	14.91	1	1291	1.63	0.363	11	6	3	2016-08-27	1	1	0	0			- -
482	2016-08-24 10:00	≥3	43	GnRH-antagonist	24.22	secondary	tubal	8	IVF	NA	9.12	3.77	58.87	9.77	1	1064	4.94	0.527	11.1	3	2	2016-08-27	2	2	0	0			- -
483	2016-08-25 09:20	0	45	GnRH-antagonist	20.96	secondary	Mixed	6	ICSI	NA	7.98	8.05	41.69	14.14	2	2436	7.7	0.504	14.6	7	2	2016-08-28	2	2	0	1	intrauterine pregnancy	yes	- -
484	2016-08-26 08:45	0	33	GnRH-antagonist	23.05	secondary	Endometriosis	2	IVF	NA	11.13	1.42	25.74	21.26	1	655.4	3.37	0.273	12	1	1	2016-08-29	1	1	0	0			- -
485	2016-08-27 08:35	1-2	39	GnRH-antagonist	21.77	secondary	tubal	4	IVF	NA	7.92	2.9	5	19.65	1	1499	1.59	0.954	10.8	9	5	2016-08-30	2	1	0	1	intrauterine pregnancy		2017-05-11	38	Cesarean	male	4.4
486	2016-08-27 10:40	0	37	GnRH-antagonist	29.84	secondary	tubal	11	IVF	NA	5.58	3.63	52.03	14.57	4	4110	9.49	0.839	10.8	21	4	2016-08-30	2	1	0	1	intrauterine pregnancy	yes	- -
487	2016-08-28 09:08	0	40	GnRH-antagonist	21.88	secondary	tubal	8	IVF	NA	7.28	6.69	32.01	17.12	2	2241	2.06	0.334	13.2	8	5	2016-08-31	2	2	0	0			- -
488	2016-08-31 08:50	0	32	GnRH-antagonist	23.23	secondary	Mixed	1	IVF	NA	4.11	2.19	14.89	8.82	1	1832	8.33	1.22	11.1	11	2	2016-09-03	2	2	0	1	intrauterine pregnancy		2017-05-16	38	vaginal	female	3.6
489	2016-09-05 08:50	0	25	GnRH-antagonist	20.4	primary	tubal	1	IVF	NA	6.58	0.245	4	19.31	1	744.1	0.37	0.841	8.2	2	1	2016-09-08	1	1	0	0			- -
490	2016-09-06 09:00	0	28	GnRH-antagonist	20.31	primary	male	1	ICSI	NA	5.87	4.27	13.48	7.27	2	2538	3.74	0.49	8.6	10	4	2016-09-09	2	2	0	0			- -
491	2016-09-09 09:10	0	37	GnRH-antagonist	21.03	primary	male	6	IVF	NA	13.31	7.93	54.39	16.93	1	683.3	11.12	0.155	9.5	2	1	2016-09-12	1	1	0	0			- -
492	2016-09-11 10:05	0	35	GnRH-antagonist	25.64	secondary	tubal	2	IVF	NA	5.27	2.65	39.87	12.02	1	1451	1.18	0.377	9.1	3	2	2016-09-14	2	2	0	1	intrauterine pregnancy		2017-06-04	39	Cesarean	male	3.6
493	2016-09-16 09:10	0	28	GnRH-antagonist	20.7	secondary	tubal	2	IVF	NA	6.47	4.86	62.9	7.43	4	4730	2.27	0.389	10.1	13	2	2016-09-19	2	2	0	0			- -
494	2016-09-16 09:30	0	27	GnRH-antagonist	21.48	secondary	tubal	1	IVF	NA	5.81	8.36	30.26	6.02	2	2405	5.16	0.569	13.6	7	2	2016-09-19	2	1	0	1	intrauterine pregnancy		2017-05-23	37	Cesarean	male	2.25	female	2.6
495	2016-09-16 10:00	0	22	GnRH-antagonist	17.97	primary	male	2	ICSI	NA	7.76	4.81	35.09	17.65	3	3610	3.53	0.707	9.5	17	2	2016-09-19	2	2	0	0			- -
496	2016-09-21 09:40	1-2	36	GnRH-antagonist	24.46	secondary	Mixed	3	IVF	NA	8.21	2.93	31.57	14.61	1	1685	1.44	0.632	10.5	9	4	2016-09-24	2	2	0	0			- -
497	2016-09-26 08:55	0	35	GnRH-antagonist	19.15	secondary	tubal	1	IVF	NA	5.51	9.5	53.13	19.58	1	386.9	4.42	0.429	7.4	1	1	2016-09-29	1	1	0	0			- -
498	2016-09-27 08:48	0	40	GnRH-antagonist	28.35	secondary	tubal	5	IVF	NA	11.96	3.85	10.22	12.09	1	725.8	2.64	0.695	9.3	3	2	2016-09-30	2	1	0	0			- -
499	2016-09-27 09:10	0	38	GnRH-antagonist	23.44	secondary	tubal	1	IVF	NA	6.91	3.6	28.86	19.41	2	2503	3.23	0.828	15	6	5	2016-09-30	2	2	0	1	intrauterine pregnancy		2017-06-07	38	Cesarean	female	2.7
500	2016-09-30 08:40	0	26	GnRH-antagonist	18.03	primary	Mixed	1	IVF	NA	8.86	3.25	50.68	7.89	2	2117	3.3	0.393	10.2	8	2	2016-10-03	2	2	0	1	intrauterine pregnancy		2017-06-09	38	vaginal	female	2.7	female	2.45
501	2016-10-02 10:45	1-2	36	GnRH-antagonist	23.88	primary	male	2	ICSI	NA	5.62	2.83	34.9	16.78	1	1901	1.06	0.794	12.3	6	4	2016-10-05	2	1	0	1	intrauterine pregnancy		2017-06-21	39	Cesarean	male	4.1
502	2016-10-02 10:55	0	41	GnRH-antagonist	23.88	secondary	Mixed	6	IVF	NA	9.88	4.76	40.85	14.08	1	684.4	2.36	0.303	14	6	2	2016-10-05	2	2	0	0			- -
503	2016-10-04 08:55	0	22	GnRH-antagonist	21.03	primary	tubal	2	IVF	NA	8.92	8.34	40.42	8.81	1	726	3.53	0.818	10.4	2	2	2016-10-07	2	2	0	1	intrauterine pregnancy		2017-05-26	34	Cesarean	male	2	male	2.5
504	2016-10-04 09:50	0	28	GnRH-antagonist	23.42	primary	tubal	5	IVF	NA	4.63	6.26	39	13.18	4	4274	1.56	1.08	13.3	15	6	2016-10-07	2	2	0	1	intrauterine pregnancy		2017-05-06	32	vaginal	male	1.98
505	2016-10-06 09:30	0	36	GnRH-antagonist	19.11	primary	male	4	IVF	NA	6.83	2.81	33.86	20.93	2	2005	3.18	0.61	9.8	6	3	2016-10-09	2	2	0	0			- -
506	2016-10-06 09:40	0	36	GnRH-antagonist	21.99	secondary	tubal	1	IVF	NA	6.04	4.51	32.41	19.07	2	2248	1.84	0.535	12.3	10	5	2016-10-09	2	2	0	1	intrauterine pregnancy		2017-06-05	36	Cesarean	male	2.5	male	3.1
507	2016-10-07 09:35	0	26	GnRH-antagonist	21.36	primary	Mixed	2	IVF	NA	6.41	6.24	27.03	13.77	1	1790	3.59	1.07	8	6	5	2016-10-10	2	2	0	1	intrauterine pregnancy		2017-05-14	32	Cesarean	female	1.9
508	2016-10-08 09:35	0	43	GnRH-antagonist	21.09	secondary	Mixed	3	IVF	NA	11.14	4.71	22.06	16.69	1	908.7	3.89	0.192	9.4	4	2	2016-10-11	2	1	0	1	intrauterine pregnancy		2017-07-01	38	Cesarean
509	2016-10-08 10:20	0	36	GnRH-antagonist	21.41	primary	tubal	8	IVF	NA	5.21	1.93	43.9	10.04	1	975.5	0.429	0.575	13.2	8	2	2016-10-11	2	1	0	1	intrauterine pregnancy		2017-05-31	35	Cesarean
510	2016-10-09 09:35	0	34	GnRH-antagonist	20	primary	tubal	4	IVF	NA	8.71	9.1	24.64	13.14	4	4320	4.82	1.28	12.4	10	4	2016-10-12	2	2	0	1	intrauterine pregnancy		2017-07-09	41	vaginal	female	2.7
511	2016-10-13 08:45	0	44	GnRH-antagonist	23.44	secondary	Mixed	1	IVF	NA	6.45	4.71	51.25	17.25	1	947.7	1.59	0.565	11	3	2	2016-10-16	2	2	0	0			- -
512	2016-10-14 09:15	0	41	GnRH-antagonist	25.1	secondary	tubal	3	IVF	NA	6.15	6.05	61.7	14.07	1	1457	5.5	0.597	8.1	3	1	2016-10-17	1	1	0	0			- -
513	2016-10-16 09:00	1-2	34	GnRH-antagonist	44.95	primary	male	4	ICSI	NA	7.51	4.27	43.1	20.17	1	1243	1.05	0.454	12.2	9	4	2016-10-19	2	2	0	1	intrauterine pregnancy		2017-07-01	38	Cesarean	male	2.75
514	2016-10-17 09:30	1-2	29	GnRH-antagonist	20.28	secondary	Mixed	1	IVF	NA	6.22	3.26	29	14.14	2	2141	1.08	0.667	10	16	4	2016-10-20	2	2	0	1	intrauterine pregnancy		2017-07-04	39	Cesarean	male	3.65
515	2016-10-19 08:45	1-2	29	GnRH-antagonist	21.79	primary	male	1	ICSI	NA	13.32	6.18	23.73	30.11	1	1310	4.39	1.12	14	4	2	2016-10-22	2	1	0	0			- -
516	2016-10-19 10:05	0	31	GnRH-antagonist	16.8	primary	tubal	6	IVF	NA	5.65	3.82	19	9.77	4	4364	6.21	0.646	10.2	13	4	2016-10-22	2	2	0	1	intrauterine pregnancy		2017-06-27	38	Cesarean	female	2.9
517	2016-10-22 08:50	0	34	GnRH-antagonist	24.14	primary	male	10	ICSI	NA	6.02	8.67	17.07	13.11	2	2034	14.92	1.24	12.9	12	4	2016-10-25	2	2	0	1	intrauterine pregnancy		2017-07-12	39	vaginal	female	3.5
518	2016-10-24 08:50	1-2	34	GnRH-antagonist	19.31	primary	tubal	6	ICSI	NA	6.49	8.74	24.04	22.49	2	2378	4.86	1.09	10.7	15	4	2016-08-29	2	2	0	0			- -
519	2016-10-24 09:45	≥3	31	GnRH-antagonist	22.89	primary	Mixed	7	IVF	NA	4.62	3.19	40	18.2	2	2030	1.99	0.84	8.4	7	2	2016-10-27	2	1	0	1	intrauterine pregnancy	yes	- -
520	2016-10-25 09:15	1-2	31	GnRH-antagonist	18.55	primary	Ovulatory	4	IVF	NA	8.02	6.1	69.2	8.68	2	2312	5.04	0.815	9.3	8	2	2016-10-28	2	2	0	1	intrauterine pregnancy		2017-07-04	38	Cesarean	male	2.65	female	2.45
521	2016-10-29 09:30	0	29	GnRH-antagonist	20.7	primary	male	3	IVF	NA	6.63	5.72	9.03	11.89	2	2931	1.68	1.08	15	12	4	2016-11-01	2	2	0	1	intrauterine pregnancy	yes	- -
522	2016-11-01 09:10	0	33	GnRH-antagonist	18.07	secondary	male	2	IVF	NA	4.56	7.2	24.05	8.17	1	1490	5.47	0.99	10.7	6	2	2016-11-01	2	1	0	1	intrauterine pregnancy		2017-07-21	39	Cesarean	male	3.4
523	2016-11-01 10:40	0	28	GnRH-antagonist	22.03	secondary	tubal	1	IVF	NA	7.56	6.53	21.3	13.58	1	1464	0.1	0.522	9.2	18	4	2016-11-04	2	2	0	1	intrauterine pregnancy		2017-07-23	39	vaginal	female	2.95
524	2016-11-03 08:55	0	26	GnRH-antagonist	19.07	secondary	tubal	1	IVF	NA	5.87	7.84	30.07	8.62	4	4250	5	0.678	11.8	15	4	2016-11-06	2	2	0	0			- -
525	2016-11-03 09:30	0	34	GnRH-antagonist	19.98	secondary	tubal	10	IVF	NA	6.89	3	56.51	22.37	3	3698	1.55	0.8	13	9	5	2016-11-06	2	2	0	0			- -
526	2016-11-11 09:55	1-2	44	GnRH-antagonist	22.6	secondary	tubal	1	IVF	NA	7.67	4.62	51.99	16.78	2	2245	6.73	0.905	9.3	8	4	2016-11-14	2	2	0	0			- -
527	2016-11-21 08:50	0	30	GnRH-antagonist	19.05	primary	Mixed	4	IVF	NA	8.5	7.16	28.04	25.55	2	2083	5.53	0.476	15.1	10	6	2016-11-24	2	2	0	1	intrauterine pregnancy		2017-08-01	38	Cesarean	female	2.75	female	2.15
528	2016-11-21 09:10	≥3	42	GnRH-antagonist	22.03	primary	tubal	18	IVF	NA	6.27	5.17	34.74	15.22	1	1503	1.34	0.447	10.3	4	3	2016-11-24	2	2	0	0			- -
529	2016-11-21 09:50	0	31	GnRH-antagonist	20.83	secondary	tubal	1	IVF	NA	6.42	4.18	37.29	9.67	3	3478	2.26	0.337	11.8	21	4	2016-11-24	2	2	0	1	intrauterine pregnancy		2017-08-02	38	Cesarean	male	3.15	female	2.9
530	2016-11-22 08:50	0	27	GnRH-antagonist	19.05	secondary	Mixed	4	ICSI	NA	9.99	3.96	18.49	10.47	2	2803	3.04	0.759	7.7	11	3	2016-11-25	2	2	0	1	intrauterine pregnancy		2017-07-18	35	Cesarean	male	2	female	2
531	2016-11-28 09:50	1-2	39	GnRH-antagonist	19.91	secondary	tubal	1	ICSI	NA	6.69	3.98	40.22	14.47	2	2088	2.01	1.18	8.7	6	3	2016-12-01	2	1	0	0			- -
532	2016-11-28 10:20	0	24	GnRH-antagonist	20.96	secondary	tubal	0	IVF	NA	10.56	4.93	68.4	21.55	1	1108	3.47	0.598	10.2	3	2	2016-12-01	2	2	0	0			- -
533	2016-11-29 09:45	0	33	GnRH-antagonist	16.61	secondary	tubal	1	IVF	NA	12.59	6.31	54.58	14.6	1	1650	6.93	0.575	11.5	9	2	2016-12-02	2	2	0	1	intrauterine pregnancy		2017-08-18	39	vaginal	female	3
534	2016-11-30 09:20	0	35	GnRH-antagonist	19.29	primary	Mixed	3	IVF	NA	7.74	4.59	36.94	16.18	2	2923	9.18	0.802	11	7	2	2016-12-03	2	2	0	0			- -
535	2016-11-30 09:40	0	41	GnRH-antagonist	19.98	secondary	Mixed	1	IVF	NA	5.9	4.54	70.06	21.94	2	2284	1.82	1.09	14.8	10	7	2016-12-03	2	2	0	1	intrauterine pregnancy	yes	- -
536	2016-12-01 09:10	1-2	36	GnRH-antagonist	22.03	secondary	tubal	3	IVF	NA	5.53	1.65	44	15.71	2	2021	2.02	1.24	12.7	9	4	2016-12-04	2	2	0	1	intrauterine pregnancy		2017-08-14	38	vaginal	male	3.15
537	2016-12-04 09:35	0	29	GnRH-antagonist	25.78	secondary	male	3	ICSI	NA	4.97	2.62	31.92	11.93	3	3578	1.74	0.592	10.4	16	6	2016-12-07	2	2	0	1	intrauterine pregnancy		2017-08-18	39	vaginal	male	3.9
538	2016-12-05 09:20	0	39	GnRH-antagonist	23.11	secondary	male	5	IVF	NA	6.61	1.51	5	18.54	1	1934	0.644	0.352	9.4	9	8	2016-12-08	2	2	0	0			- -
539	2016-12-06 09:50	0	31	GnRH-antagonist	23.43	primary	tubal	4	IVF	NA	5.27	4.73	30.44	11.12	2	2361	1.37	0.94	14	18	4	2016-12-09	2	2	0	0			- -
540	2016-12-06 10:15	0	33	GnRH-antagonist	18.37	primary	tubal	5	IVF	NA	5.78	4.96	54.3	22.49	2	2171	2.53	0.626	12.4	6	3	2016-12-09	2	2	0	0			- -
541	2016-12-09 10:10	0	29	GnRH-antagonist	20.55	secondary	tubal	5	IVF	NA	12.641	4.432	46.982	27.54	1	1216	1.01	0.68	7.7	3	2	2016-12-12	2	2	0	1	intrauterine pregnancy		2017-08-14	37	Cesarean	male	3.8
542	2016-12-10 09:15	≥3	35	GnRH-antagonist	22.46	primary	tubal	4	IVF	NA	11.23	5.88	69.02	17.41	1	1462	4.32	0.52	11.7	8	2	2016-12-13	2	1	0	0			- -
543	2016-12-12 09:10	0	26	GnRH-antagonist	27.04	secondary	tubal	1	IVF	NA	6.49	3.74	29.75	11.79	2	2375	2.46	1.16	9.1	15	4	2016-12-15	2	1	0	1	intrauterine pregnancy		2017-09-01	39	vaginal	female	3
544	2016-12-13 10:20	0	34	GnRH-antagonist	22.03	primary	Unexplained	2	IVF	NA	6.1	2.11	53.63	32.35	2	3000	2.44	1.25	10	15	6	2016-12-16	2	2	0	0			- -
545	2016-12-14 09:20	1-2	42	GnRH-antagonist	19.63	secondary	tubal	1	IVF	NA	6.72	7.62	31.12	15.92	1	1092	1.95	0.482	16.7	4	2	2016-12-17	2	1	0	0			- -
546	2016-12-16 09:35	0	38	GnRH-antagonist	17.01	primary	male	4	IVF	NA	3.84	6.98	47.1	26.26	2	2071	1.77	1.09	9.9	7	7	2016-12-19	2	2	0	0			- -
547	2016-12-19 10:15	1-2	44	GnRH-antagonist	25.39	secondary	tubal	1	IVF	NA	6.56	4.46	54.54	13.98	1	1442	4.69	1.06	16	5	3	2016-12-22	2	2	0	0			- -
548	2016-12-23 08:50	1-2	38	GnRH-antagonist	17.75	secondary	Unexplained	1	IVF	NA	6.74	3.35	16.41	29.95	3	3790	3.49	1.18	7.5	6	4	2016-12-26	2	1	0	0			- -
549	2016-12-24 09:15	0	35	GnRH-antagonist	30.82	primary	Mixed	3	IVF	NA	6.78	7.26	65.58	9.34	1	851	2.14	0.535	14.1	6	5	2016-12-27	2	2	0	1	intrauterine pregnancy		2017-09-06	37	Cesarean	female	3.6
550	2016-12-26 09:00	0	43	GnRH-antagonist	19.1	secondary	tubal	1	IVF	NA	7.58	1.5	38	19.17	1	1348	4.35	0.551	9	4	4	2016-12-29	2	2	0	0			- -
551	2016-12-27 09:50	1-2	33	GnRH-antagonist	18.9	secondary	Mixed	1	IVF	NA	12.29	6.59	12.46	21.1	1	740.7	3.76	0.595	12.9	3	2	2016-12-30	2	1	0	0			- -
552	2016-12-27 10:00	0	29	GnRH-antagonist	23.81	secondary	tubal	1	IVF	NA	6.1	3.69	17.01	12.47	1	1300	1.44	0.858	9.6	7	2	2016-12-30	2	1	0	0			- -
553	2016-12-31 09:35	0	28	GnRH-antagonist	21.83	primary	male	1	ICSI	NA	8.39	6.78	41.74	14.13	1	1745	2.76	0.71	8.1	9	2	2017-01-03	2	1	0	0			- -
554	2017-01-05 10:00	0	34	GnRH-antagonist	22.94	secondary	male	2	IVF	NA	7.01	6.51	46.64	20.12	2	2578	4.23	0.864	9.1	10	6	2017-01-08	2	2	0	0			- -
555	2017-01-08 09:10	≥3	44	GnRH-antagonist	23.8	secondary	tubal	6	IVF	NA	12.23	6.22	54.06	13.86	1	738.1	1.85	0.933	13	2	2	2017-01-11	2	1	0	0			- -
556	2017-01-10 09:23	0	41	GnRH-antagonist	17.85	secondary	Mixed	2	IVF	NA	6.8	5.06	77	13.26	1	580.2	3.41	1.18	8	4	2	2017-01-13	2	1	0	0			- -
557	2017-01-11 09:00	0	44	GnRH-antagonist	28.89	secondary	male	1	IVF	NA	5.6	2.9	40.84	15.06	1	516.1	2.3	0.174	9.1	1	1	2017-01-14	1	1	0	0			- -
558	2017-01-11 09:15	1-2	42	GnRH-antagonist	19.23	secondary	tubal	2	IVF	NA	8.1	4.98	51.39	17.75	1	543.9	2.88	0.177	12.7	4	2	2017-01-14	2	2	0	0			- -
559	2017-01-14 09:50	0	37	GnRH-antagonist	NA	secondary	tubal	1	IVF	NA	11.51	4.49	44.13	15.24	2	2031	2.57	0.738	12.8	16	5	2017-01-17	2	1	0	1	intrauterine pregnancy		2017-09-18	37	Cesarean	male	2.6	female	2.5
560	2017-01-14 10:10	0	37	GnRH-antagonist	30.44	secondary	tubal	0	IVF	NA	4.71	1.85	29.15	12.65	2	2397	1.66	0.826	14.9	11	2	2017-01-17	2	1	0	0			- -
561	2017-01-15 09:30	0	41	GnRH-antagonist	22.04	secondary	tubal	1	IVF	NA	8.96	3.7	30.68	11.85	1	1991	2.54	1.02	1.8	8	4	2017-01-18	2	2	0	0			- -
562	2017-01-17 08:45	0	32	GnRH-antagonist	21.36	primary	Mixed	8	IVF	NA	14.8	3	44.88	36.15	1	767.4	6.51	0.293	7.2	2	2	2017-01-20	2	2	0	0			- -
563	2017-01-18 09:20	0	34	GnRH-antagonist	17.34	secondary	tubal	4	IVF	NA	10.13	3.46	30.82	12.08	3	3008	1.2	1.29	7	12	4	2017-01-21	2	2	0	0			- -
564	2017-02-13 08:50	0	32	GnRH-antagonist	19.53	secondary	male	3	IVF	NA	7.64	3.93	31.63	13.06	1	1937	2.67	1.43	9.5	11	2	2017-02-16	2	2	0	0			- -
565	2017-02-17 09:55	0	43	GnRH-antagonist	22.86	secondary	male	1	ICSI	NA	7.15	5.16	43.41	11.32	2	2683	3.23	1.2	8.6	13	7	2017-02-20	2	2	0	0			- -
566	2017-02-21 09:55	0	23	GnRH-antagonist	18.08	secondary	male	1	ICSI	NA	7.03	7.66	48.81	12.62	2	2614	2.87	1.03	11.1	13	3	2017-02-24	1	1	0	0			- -
567	2017-02-22 08:55	0	29	GnRH-antagonist	24.77	primary	male	1	ICSI	NA	7.88	6.15	35.55	12.51	1	1957	2.85	0.452	9.4	7	4	2017-02-25	2	2	0	1	intrauterine pregnancy		2017-11-04	38	Cesarean	male	2.7	female	2.3
568	2017-02-23 09:20	1-2	38	GnRH-antagonist	20.7	secondary	Endometriosis	1	IVF	NA	6.8	5.14	19.37	17.09	1	1187	5.58	1.23	10.5	4	3	2017-02-26	2	2	0	0			- -
569	2017-02-24 09:35	0	30	GnRH-antagonist	20.83	primary	tubal	2	IVF	NA	9.02	4.23	30.48	13.36	2	2042	2.54	0.754	12.3	11	4	2017-02-27	2	2	0	0			- -
570	2017-02-24 10:35	0	41	GnRH-antagonist	25.1	secondary	tubal	1	IVF	NA	9.3	2.9	39	15.05	1	720.9	3.08	0.816	7.7	3	3	2017-02-27	2	2	0	1	intrauterine pregnancy	yes	- -
571	2017-02-24 10:50	0	39	GnRH-antagonist	21.16	secondary	tubal	0	IVF	NA	7.537	5.193	41.41	15.13	1	1593	3.21	0.923	12.5	13	2	2017-02-27	2	1	0	0			- -
572	2017-02-25 09:15	0	35	GnRH-antagonist	21.48	secondary	male	4	IVF	NA	6.14	5.06	23.91	11.47	3	3790	1.81	1.35	11.3	11	6	2017-02-28	2	1	0	1	intrauterine pregnancy		2017-11-19	39	vaginal	female	3.75
573	2017-02-25 09:35	0	39	GnRH-antagonist	22.38	secondary	male	1	IVF	NA	10.11	2.09	44.5	19.32	2	2052	1.6	1.05	9.1	8	2	2017-02-28	2	2	0	1	intrauterine pregnancy		2017-11-02	37	Cesarean	female	2.55	female	2.6
574	2017-02-25 10:00	0	43	GnRH-antagonist	18.03	secondary	Mixed	1	IVF	NA	8.51	8.57	52.55	NA	1	1527	2.33	0.996	7.2	6	4	2017-02-28	2	2	0	0			- -
575	2017-02-26 09:10	1-2	39	GnRH-antagonist	17.8	primary	Mixed	2	IVF	NA	7.4	6.77	32.74	21.96	1	1862	3.33	0.727	9.2	5	2	2017-03-01	2	1	0	1	intrauterine pregnancy		2017-11-03	37	Cesarean	male	2.9
576	2017-02-27 09:00	1-2	33	GnRH-antagonist	20.03	secondary	tubal	2	IVF	NA	4.2	2.47	48	19.95	1	1192	1.75	0.774	16	3	2	2017-03-02	2	1	0	1	intrauterine pregnancy		2017-11-19	39	Cesarean	male	2.9
577	2017-02-27 09:15	1-2	45	GnRH-antagonist	29.24	secondary	Mixed	4	IVF	NA	13.5	5.92	13.62	13.55	1	944.9	4.95	0.409	13.7	3	1	2017-03-02	1	1	0	0			- -
578	2017-02-27 09:30	1-2	33	GnRH-antagonist	18.9	secondary	Mixed	1	IVF	NA	12.29	6.59	12.46	23.8	1	1710	2.6	0.872	13	9	4	2017-03-02	2	1	0	1	intrauterine pregnancy		2017-11-16	39	vaginal	female	2.6
579	2017-03-01 08:45	1-2	30	GnRH-antagonist	20.44	primary	Mixed	7	IVF	NA	7.56	5.56	28.23	17.25	1	1047	3.92	0.717	10.5	5	4	2017-03-04	2	1	0	0			- -
580	2017-03-02 08:30	0	38	GnRH-antagonist	23.34	secondary	tubal	3	IVF	NA	6.34	9.07	42.78	21.17	1	1257	6.3	1.25	11	4	3	2017-03-05	2	2	0	0			- -
581	2017-03-02 09:25	≥3	43	GnRH-antagonist	26.49	secondary	tubal	1	IVF	NA	5.5	4.07	59.48	8.22	1	406.8	2.48	0.244	10.1	3	2	2017-03-05	2	1	0	0			- -
582	2017-03-03 09:15	0	43	GnRH-antagonist	22.6	secondary	male	1	IVF	NA	7.26	7.91	77.4	23.94	1	1211	2.84	0.644	11.4	6	4	2017-03-06	2	2	0	0			- -
583	2017-03-05 09:00	≥3	46	GnRH-antagonist	26.49	secondary	tubal	5	IVF	NA	5.26	5.91	77	8.4	1	445.8	3.92	0.578	14.5	3	2	2017-03-08	2	1	0	1	intrauterine pregnancy	yes	- -
584	2017-03-08 09:35	0	33	GnRH-antagonist	22.86	secondary	tubal	2	IVF	NA	8.86	6.75	49.38	14.09	2	2731	3.19	0.723	12.2	13	5	2017-03-11	2	2	0	0			- -
585	2017-03-11 09:20	0	33	GnRH-antagonist	23.94	secondary	tubal	1	IVF	NA	5.94	7	1.23	14.17	2	2096	6.18	0.745	16.9	9	4	2017-03-14	2	2	0	0			- -
586	2017-03-12 09:10	0	31	GnRH-antagonist	17.63	primary	male	3	ICSI	NA	5.62	3.24	71	10.73	3	3720	1.02	0.851	11.7	16	4	2017-03-15	2	2	0	1	intrauterine pregnancy		2017-10-25	34	Cesarean	female	2	female	1.55
587	2017-03-13 09:15	0	32	GnRH-antagonist	22.06	secondary	tubal	9	IVF	NA	7.43	1.8	43.49	15.84	1	1348	1.06	0.617	12.1	10	4	2017-03-16	2	2	0	1	intrauterine pregnancy		2017-11-20	38	vaginal	male	2.8
588	2017-03-13 10:15	1-2	42	GnRH-antagonist	18.5	secondary	Mixed	1	IVF	NA	3.06	4.17	75.74	24.34	3	3064	2.99	0.904	8.3	6	6	2017-03-16	2	2	0	0			- -
589	2017-03-14 08:50	0	25	GnRH-antagonist	18.75	secondary	Mixed	1	IVF	NA	8.201	6.762	13.909	16.16	3	3150	0.626	1.4	11.8	13	4	2017-03-17	2	2	1	1	intrauterine pregnancy		2017-10-18	33	vaginal	male	1.7	female	1.55
590	2017-03-16 09:00	0	33	GnRH-antagonist	17.19	primary	Mixed	3	IVF	NA	8.6	2.63	68.48	19.31	1	814.4	4.08	0.715	9.9	2	2	2017-03-19	2	1	0	1	intrauterine pregnancy		2017-11-21	37	Cesarean	female	2.6	female	2.4
591	2017-03-16 09:30	0	32	GnRH-antagonist	20.57	primary	male	3	IVF	NA	7.66	8.1	67.8	8.28	3	3332	9.7	1.02	15.2	16	4	2017-03-19	2	1	0	1	intrauterine pregnancy		2017-11-26	37	Cesarean	male	3	female	2.6
592	2017-03-20 09:15	≥3	36	GnRH-antagonist	22.43	primary	tubal	10	IVF	NA	13.82	9.6	48.76	12.52	1	891.9	2.66	1.03	9.7	7	5	2017-03-23	2	1	0	0			- -
593	2017-03-23 09:00	0	33	GnRH-antagonist	23.32	secondary	tubal	1	IVF	NA	6.72	2.67	27.06	9.39	1	1371	2.65	1.32	10	10	2	2017-03-26	2	1	0	1	intrauterine pregnancy		2017-11-28	37	Cesarean	male	3.6	female	2.6
594	2017-03-27 09:20	0	31	GnRH-antagonist	20.93	primary	tubal	3	IVF	NA	4.55	1.25	49.42	15.21	1	1858	1.48	1.03	10.8	7	2	2017-03-30	2	2	0	1	intrauterine pregnancy		2017-12-18	40	vaginal	female	3.25
595	2017-03-27 09:40	0	45	GnRH-antagonist	19.65	primary	male	3	IVF	NA	1.63	9.75	49.26	21.37	1	1235	5.23	0.873	10.5	6	3	2017-03-30	2	1	0	0			- -
596	2017-03-28 09:55	0	30	GnRH-antagonist	23.83	primary	tubal	6	IVF	NA	7.8	4.11	40.07	11.72	2	2775	6.64	0.487	13.4	14	4	2017-03-31	2	2	0	0			- -
597	2017-03-28 10:37	0	33	GnRH-antagonist	20.2	secondary	tubal	2	IVF	NA	5.57	4.05	34.3	20.6	1	1848	1.43	1.05	15.6	10	2	2017-03-31	2	2	0	1	intrauterine pregnancy		2017-12-09	38	Cesarean	male	3.5
598	2017-03-29 10:20	0	38	GnRH-antagonist	NA	secondary	tubal	10	IVF	NA	11.73	6.8	16.04	16.99	1	895.5	4.78	0.516	9.2	2	2	2017-04-01	2	1	0	1	intrauterine pregnancy	yes	- -
599	2017-04-01 08:45	0	35	GnRH-antagonist	20.28	secondary	tubal	4	IVF	NA	6.3	5.68	44.6	15.44	2	2857	5.18	1.03	11.3	15	4	2017-04-04	2	1	0	0			- -
600	2017-04-01 09:10	0	30	GnRH-antagonist	24.44	secondary	tubal	0	IVF	NA	7.41	2.85	24.28	11.32	1	1854	2.03	0.834	9.2	10	2	2017-04-04	2	1	0	0			- -
601	2017-04-03 09:25	1-2	28	GnRH-antagonist	24.54	secondary	tubal	2	IVF	NA	17.63	7.54	23.72	9.33	1	897.6	2.08	0.769	10.8	6	2	2017-04-06	2	2	0	0			- -
602	2017-04-08 09:05	0	39	GnRH-antagonist	23.81	secondary	tubal	4	IVF	NA	5.939	1.784	39.413	12.91	1	1216	2.88	0.738	11.5	4	4	2017-04-11	2	2	0	0			- -
603	2017-04-10 09:50	0	45	GnRH-antagonist	19.15	secondary	Mixed	2	ICSI	NA	20.07	6.61	37	25.07	1	1117	6.82	0.634	12.3	2	1	2017-04-13	1	1	0	0			- -
604	2017-04-12 09:10	0	23	GnRH-antagonist	29.38	primary	tubal	3	IVF	NA	5.74	7.33	16.34	13.43	2	2696	3.36	0.779	NA	7	2	2017-04-15	2	2	0	0			- -
605	2017-04-18 08:40	0	47	GnRH-antagonist	24.78	secondary	male	11	ICSI	NA	12.93	3.99	9.07	15.16	1	505.7	5.55	0.553	9.2	2	1	2017-04-21	1	1	0	0			- -
606	2017-04-21 09:10	0	26	GnRH-antagonist	20.57	primary	Mixed	1	IVF	NA	16.124	7.684	15.695	15.11	1	1159	4.1	0.6	7.4	3	2	2017-04-24	2	1	0	0			- -
607	2017-04-23 09:15	0	35	GnRH-antagonist	17.85	secondary	tubal	3	IVF	NA	9.94	5.05	67.28	20.15	1	1746	1.78	0.673	8.4	4	1	2017-04-26	1	1	0	0			- -
608	2017-04-25 09:00	0	42	GnRH-antagonist	25.64	secondary	tubal	1	IVF	NA	9.9	8.37	47.43	21.02	1	1256	17.26	0.64	10.8	4	3	2017-04-28	2	1	0	0			- -
609	2017-04-28 09:13	0	41	GnRH-antagonist	26.37	secondary	male	1	IVF	NA	9.09	3.66	74	15.52	1	838.6	2.81	0.494	10.9	4	4	2017-05-01	2	1	0	0			- -
610	2017-05-01 08:35	0	31	GnRH-antagonist	17.85	secondary	tubal	1	IVF	NA	9.1	1.95	20	16.92	1	1061	1.65	1.14	13	12	2	2017-05-04	2	2	0	0			- -
611	2017-05-06 08:55	0	37	GnRH-antagonist	25.08	secondary	tubal	2	IVF	NA	6.49	3.92	29.94	11.92	2	2336	3.44	1.04	14.9	10	4	2017-05-09	2	2	0	0			- -
612	2017-05-07 08:50	0	37	GnRH-antagonist	26.04	secondary	Mixed	18	ICSI	NA	6.219	4.633	39.486	16.08	1	822	7.8	0.449	9.9	2	1	2017-05-10	1	1	0	0			- -
613	2017-05-14 09:10	0	33	GnRH-antagonist	19.4	primary	tubal	4	IVF	NA	8.61	3.85	14.68	14.03	2	2599	1.77	0.947	10.3	14	4	2017-05-17	2	2	0	1	intrauterine pregnancy		2018-02-04	39	vaginal	female	3.2
614	2017-05-20 08:45	0	42	GnRH-antagonist	21.48	secondary	Mixed	1	IVF	NA	7.7	4.72	38.05	14.88	1	966.7	4.84	0.251	9.6	5	5	2017-05-23	2	1	0	0			- -
615	2017-05-23 09:10	1-2	28	GnRH-antagonist	19.38	secondary	male	3	IVF	NA	7.28	5.18	48.55	9.19	3	3075	2.3	0.261	10.8	14	4	2017-05-26	2	2	0	1	intrauterine pregnancy		2018-01-24	36	Cesarean	male	2.7	male	2.35
616	2017-05-29 09:05	0	35	GnRH-antagonist	20.57	secondary	tubal	10	IVF	NA	6.25	7.53	37.36	15.31	3	3650	5.26	0.837	9.3	19	2	2017-06-01	2	2	0	0			- -
617	2017-05-31 09:00	1-2	42	GnRH-antagonist	27.18	secondary	tubal	2	IVF	NA	6.65	3.42	39.78	11.15	1	949.6	3.17	0.78	9.9	4	2	2017-06-03	2	1	0	0			- -
618	2017-06-02 09:15	0	29	GnRH-antagonist	22.04	secondary	male	5	ICSI	NA	5.24	8.15	26.71	9.3	2	2709	3.08	1.02	9	14	5	2017-06-05	2	1	0	1	intrauterine pregnancy		2018-01-29	36	Cesarean	male	3.5	male	2.8
619	2017-06-05 09:10	1-2	30	GnRH-antagonist	27.34	secondary	tubal	1	IVF	NA	5.88	1.95	62.22	12.01	1	1029	0.959	0.801	12.2	10	2	2017-06-08	2	2	0	1	intrauterine pregnancy		2018-02-03	36	Cesarean	male	2.45	female	2.8
620	2017-06-07 08:40	0	37	GnRH-antagonist	20.96	secondary	male	1	IVF	NA	2.38	1.96	74.9	19.97	1	1157	5.67	0.719	10	4	3	2017-06-10	2	2	0	0			- -
621	2017-06-09 10:10	0	32	GnRH-antagonist	20.55	primary	Ovulatory	1	IVF	NA	6.36	10.44	29	8.52	1	710	0.95	0.459	8	3	2	2017-06-12	2	1	0	0			- -
622	2017-06-12 09:00	0	40	GnRH-antagonist	21.5	secondary	tubal	2	IVF	NA	7.21	6.12	40.34	16.33	1	642.6	0.745	0.498	11	8	4	2017-06-15	2	2	0	0			- -
623	2017-06-16 09:20	1-2	28	GnRH-antagonist	20.31	primary	male	1	ICSI	NA	5.87	4.27	13.48	8.62	3	3518	1.26	0.972	8.9	18	4	2017-06-19	2	2	0	0			- -
624	2017-06-17 08:52	1-2	42	GnRH-antagonist	25.64	secondary	tubal	1	IVF	NA	9.45	7.43	47.43	11.33	1	1506	5.78	0.487	11.2	6	3	2017-06-20	2	1	0	1	intrauterine pregnancy		2018-02-19	39	Cesarean	male	3.65
625	2017-06-18 08:50	0	27	GnRH-antagonist	19.23	primary	male	1	ICSI	NA	9.12	7.12	37.37	16.07	2	2870	5.86	1.25	12.6	11	4	2017-06-21	2	2	0	1	intrauterine pregnancy		2018-01-14	31	Cesarean	male	1.65	male	1.45
626	2017-06-19 09:40	0	39	GnRH-antagonist	18.44	secondary	tubal	2	IVF	NA	7.3	5.37	38.48	13.34	2	2984	3.15	0.947	9.2	8	2	2017-06-22	2	2	0	1	intrauterine pregnancy		2018-02-26	39	vaginal	male	3.2
627	2017-07-08 09:15	0	29	GnRH-antagonist	20.7	secondary	Unexplained	4	IVF	NA	8.05	3.47	52.31	18.38	2	2829	2.05	1.34	11.6	7	2	2017-07-11	2	2	0	0			- -
628	2017-07-08 09:25	1-2	31	GnRH-antagonist	16.9	secondary	tubal	6	IVF	NA	4.88	3.08	62.54	21.92	1	965.7	2.42	0.595	9.4	2	2	2017-07-11	2	1	0	0			- -
629	2017-07-09 09:00	0	36	GnRH-antagonist	29.97	primary	tubal	3	IVF	NA	2.95	3.54	48.47	15.63	1	1193	3.69	0.865	11	6	5	2017-07-12	2	1	0	0			- -
630	2017-07-14 10:00	0	31	GnRH-antagonist	20.89	secondary	tubal	3	IVF	NA	8.79	4.08	29.4	19.69	2	2296	4.59	0.425	8	7	4	2017-07-17	2	2	0	0			- -
631	2017-07-15 08:40	0	27	GnRH-antagonist	19.82	primary	male	1	ICSI	NA	7.7	3.47	52.12	20.28	2	2356	0.935	1.28	11.9	18	4	2017-07-18	2	2	0	0			- -
632	2017-07-21 08:55	0	34	GnRH-antagonist	23.44	primary	male	12	ICSI	NA	8.22	13.24	43.16	14.22	1	1728	3.26	0.238	13	3	2	2017-07-24	2	2	0	1	intrauterine pregnancy		2018-04-06	39	vaginal	female	3.4
633	2017-08-05 09:00	0	32	GnRH-antagonist	16.46	primary	male	2	ICSI	NA	14.36	5.61	45.44	20.79	1	1280	1.11	0.228	11.3	7	4	2017-08-08	2	1	0	0			- -
634	2017-08-07 08:55	0	28	GnRH-antagonist	20.03	primary	male	2	IVF	NA	9.28	6.89	44.92	11.19	3	3156	1.42	0.206	12	10	2	2017-08-10	2	2	0	0			- -
635	2017-08-10 08:30	0	46	GnRH-antagonist	26.71	secondary	male	10	IVF	NA	2.47	5.82	65.22	13.35	1	906	5.44	0.239	12.4	2	2	2017-08-13	2	2	0	0			- -
636	2017-08-10 09:20	0	28	GnRH-antagonist	23.31	primary	tubal	5	IVF	NA	4.99	1.8	58.71	11.06	1	1656	1.71	0.94	8.1	9	2	2017-08-13	2	2	0	0			- -
637	2017-08-18 08:35	1-2	46	GnRH-antagonist	20.7	secondary	Mixed	1	IVF	NA	9.92	6.45	27.85	12.26	1	565.4	5.84	0.11	12.5	2	2	2017-08-21	2	2	0	0			- -
638	2017-08-18 08:50	0	42	GnRH-antagonist	19.56	secondary	male	5	IVF	NA	9.13	3.65	10.79	23.88	1	1626	4.21	0.323	11.3	8	4	2017-08-21	2	1	0	0			- -
639	2017-08-19 08:40	0	42	GnRH-antagonist	24.12	secondary	tubal	2	IVF	NA	6.49	2.4	17.34	17.87	1	562.6	3.02	0.157	10.8	3	3	2017-08-22	2	1	0	0			- -
640	2017-08-24 08:50	1-2	26	GnRH-antagonist	16.42	primary	male	3	ICSI	NA	5.85	7.91	49.16	11.72	2	2933	3.6	0.447	10.5	9	2	2017-08-27	2	2	0	1	intrauterine pregnancy		2018-05-18	40	vaginal	female	2.9
641	2017-09-07 09:55	0	35	GnRH-antagonist	21.88	primary	tubal	13	IVF	NA	9.86	5.51	38.83	15.05	1	1507	13.29	0.741	8.2	5	4	2017-09-10	2	1	0	1	intrauterine pregnancy		2018-04-17	33	Cesarean	male	2.25	male	1.8
642	2017-09-12 08:40	0	26	GnRH-antagonist	21.33	secondary	tubal	1	IVF	NA	5.12	5.4	12.85	13.45	4	4064	1.97	0.862	14	14	2	2017-09-15	2	2	0	0			- -
643	2017-09-14 08:40	0	32	GnRH-antagonist	20.28	primary	male	3	IVF	NA	8.31	9.28	9.58	14.64	1	981.3	4.97	0.059	8	3	2	2017-09-17	2	2	0	1	intrauterine pregnancy		2018-06-13	40	vaginal	female	3.3
644	2017-09-15 08:30	1-2	42	GnRH-antagonist	21.23	secondary	tubal	6	IVF	NA	7.21	4.71	20.58	11.6	1	1147	1.75	0.35	8.9	7	3	2017-09-18	2	2	0	0			- -
645	2017-09-20 08:15	0	40	GnRH-antagonist	24.24	secondary	tubal	2	IVF	NA	12.24	6.85	10.92	22.34	1	1085	15.9	0.439	15.8	3	2	2017-09-23	2	2	0	0			- -
646	2017-09-21 09:10	0	32	GnRH-antagonist	22.03	secondary	Mixed	1	IVF	NA	4.45	2.3	32.42	11.31	1	1558	5.68	0.303	12.7	6	2	2017-09-24	2	2	0	1	intrauterine pregnancy		2018-06-05	38	vaginal	male	3.2
647	2017-09-22 08:35	0	32	GnRH-antagonist	21.5	primary	tubal	3	IVF	NA	6.58	6.83	33.78	13.66	3	3124	3.33	0.962	10.2	14	2	2017-09-25	2	2	0	1	intrauterine pregnancy		2018-06-08	38	vaginal	female	2.8
648	2017-09-24 08:40	0	34	GnRH-antagonist	27.01	primary	Mixed	8	ICSI	NA	6.66	4.56	9.63	9.77	3	3290	21.47	1.09	10.9	7	2	2017-09-27	2	1	0	1	intrauterine pregnancy		2018-05-22	37	Cesarean	female	2.9
649	2017-09-26 09:00	0	29	GnRH-antagonist	22.67	primary	tubal	8	IVF	NA	7.61	7.44	19.05	12.65	3	3354	1.93	0.561	7	20	4	2017-09-29	2	2	0	1	intrauterine pregnancy	yes	- -
650	2017-09-27 09:50	0	36	GnRH-antagonist	23.44	secondary	male	10	ICSI	NA	9.32	10.8	19.84	15.51	4	4730	8.57	0.827	10.6	19	4	2017-09-30	2	2	0	1	intrauterine pregnancy		2018-06-28	41	vaginal	male	4.15
651	2017-10-02 09:06	1-2	38	GnRH-antagonist	21.64	secondary	Mixed	1	IVF	NA	6.59	2.37	38.86	16.94	1	1402	7.1	0.199	10	5	5	2017-10-05	2	2	0	1	intrauterine pregnancy		2018-06-21	40	vaginal	female	2.75
652	2017-10-02 09:40	0	38	GnRH-antagonist	23.44	secondary	Mixed	2	IVF	3.468	7.67	4.31	13.55	19.11	1	1531	3.85	0.911	11.5	9	6	2017-10-05	2	1	0	0			- -
653	2017-10-05 08:45	1-2	38	GnRH-antagonist	22.48	primary	Endometriosis	11	IVF	1.694	6.63	4.39	27.07	18.01	3	4000	4.87	0.975	8.4	15	2	2017-10-08	2	2	0	0			- -
654	2017-10-05 09:40	0	30	GnRH-antagonist	22.04	secondary	tubal	3	IVF	NA	5.9	3.12	24.42	12.09	4	4218	2.53	0.73	9.6	15	2	2017-10-08	2	2	0	0			- -
655	2017-10-07 09:05	0	28	GnRH-antagonist	20.43	primary	Ovulatory	1	IVF	1.25	7.33	2.66	30.67	17.68	1	1317	2.95	0.648	10	9	2	2017-10-10	2	1	0	1	intrauterine pregnancy		2018-06-23	38	Cesarean	female	3.35
656	2017-10-07 09:20	0	26	GnRH-antagonist	24.65	primary	male	5	ICSI	NA	7.01	6.76	12.26	10.42	1	955.6	3.48	0.432	9.4	4	2	2017-10-10	2	1	0	0			- -
657	2017-10-14 09:25	0	26	GnRH-antagonist	20.03	secondary	Mixed	3	IVF	11.05	4.81	3.04	38.62	8.74	1	1750	1.46	0.372	8.9	12	2	2017-10-17	2	2	0	0			- -
658	2017-10-17 09:00	0	46	GnRH-antagonist	24.03	secondary	tubal	2	IVF	0.077	10.65	6.21	62.37	18.02	1	892.5	5.27	0.178	10.4	4	2	2017-10-20	2	1	0	0			- -
659	2017-10-18 08:50	0	34	GnRH-antagonist	21.23	secondary	tubal	8	IVF	6.59	4.65	3.06	21.25	10.94	3	3028	1.35	0.517	9	15	2	2017-10-21	2	2	0	1	intrauterine pregnancy		2018-07-04	38	vaginal	female	3.2
660	2017-10-22 08:35	1-2	45	GnRH-antagonist	17.97	secondary	tubal	1	IVF	NA	18.7	8.86	64.15	29.62	1	1405	6.92	0.284	8.6	6	5	2017-10-25	2	2	0	0			- -
661	2017-10-26 09:50	0	27	GnRH-antagonist	18.21	primary	male	3	ICSI	11.958	5.77	4.71	15.97	14.69	2	2019	4.71	0.625	10.1	14	4	2017-10-29	2	2	0	1	intrauterine pregnancy		2018-07-10	38	vaginal	male	3.5
662	2017-11-14 09:45	0	27	GnRH-antagonist	24.17	primary	tubal	3	IVF	13.025	4.63	4.18	18.42	10.54	2	2070	3.89	0.507	9.6	4	2	2017-11-17	2	1	0	0			- -
663	2017-11-15 09:35	0	28	GnRH-antagonist	22	primary	tubal	2	IVF	13.597	7.22	6.01	21.24	7.14	2	2351	3.73	0.294	12	9	2	2017-11-18	2	1	0	0			- -
664	2017-11-17 09:05	0	26	GnRH-antagonist	16.18	primary	male	2	IVF	6.01	1.92	2.11	5	18.24	3	3114	2.48	0.858	11.2	14	1	2017-11-20	1	1	0	1	intrauterine pregnancy		2018-07-29	38	vaginal	female	2.8
665	2017-11-23 08:50	0	27	GnRH-antagonist	16.8	primary	male	3	ICSI	1.008	7.65	5.58	52.05	19.73	1	1180	3.43	0.874	12.5	7	2	2017-11-26	2	2	0	0			- -
666	2017-11-27 08:40	0	39	GnRH-antagonist	24.44	secondary	tubal	2	IVF	0.947	7.99	4.51	21.74	15.83	1	1335	2.11	0.403	12.3	4	4	2017-11-30	2	1	0	1	intrauterine pregnancy		2018-08-15	39	Cesarean	female	2.9
667	2017-11-28 08:30	0	26	GnRH-antagonist	24.03	primary	male	2	ICSI	0.678	9.74	4.32	13.27	21.11	1	750.7	11.08	0.389	10.5	2	2	2017-12-01	2	1	0	1	intrauterine pregnancy		2018-08-14	39	vaginal	male	3.55
668	2017-12-02 08:50	1-2	29	GnRH-antagonist	24.84	secondary	tubal	1	IVF	NA	6.85	3.51	5	13.23	1	1954	2.13	0.367	16	10	2	2017-12-05	2	2	0	0			- -
669	2017-12-04 09:15	1-2	35	GnRH-antagonist	22.83	secondary	male	2	ICSI	3.565	5.58	3.89	32.99	17.75	1	1991	4.55	0.256	12.2	7	5	2017-12-07	2	2	0	1	intrauterine pregnancy		2018-08-06	37	Cesarean	female	3.25
670	2017-12-05 10:30	0	31	GnRH-antagonist	22.31	secondary	tubal	1	IVF	18.666	7.4	4.51	17.45	9.61	1	1643	2.54	0.547	10	8	2	2017-12-08	2	2	0	1	intrauterine pregnancy		2018-08-25	39	vaginal
671	2017-12-06 08:30	0	30	GnRH-antagonist	19.92	primary	male	2	ICSI	0.319	6.52	3.21	39.52	18.05	1	845.7	2.69	0.418	10	5	4	2017-12-09	2	2	0	1	intrauterine pregnancy		2018-08-24	39	Cesarean
672	2017-12-09 09:15	0	27	GnRH-antagonist	20.83	primary	male	2	ICSI	8.711	8.5	5.15	36.85	8.22	1	1567	2.4	0.508	10.8	9	3	2017-12-12	2	2	0	1	intrauterine pregnancy		2018-08-12	37	vaginal	female	3
673	2017-12-09 09:30	0	29	GnRH-antagonist	17.97	secondary	tubal	2	IVF	NA	6.18	6.69	26.61	7.19	3	3105	3.29	0.451	8.4	14	2	2017-12-12	2	2	0	1	intrauterine pregnancy		2018-09-01	39	vaginal	female	2.9
674	2017-12-09 09:55	0	30	GnRH-antagonist	21.64	primary	tubal	10	IVF	10.009	5.94	6.56	29.38	5.72	3	3850	2.63	0.328	12.2	18	2	2017-12-12	2	2	0	0			- -
675	2017-12-12 08:50	≥3	40	GnRH-antagonist	26.37	secondary	tubal	1	IVF	NA	10.15	5.44	19.28	11.78	1	1674	3.79	0.224	11	12	2	2017-12-15	2	1	0	0			- -
676	2017-12-12 09:45	0	25	GnRH-antagonist	18.75	secondary	male	3	ICSI	3.621	7.4	8.27	9.27	11.42	2	2940	2.54	0.389	11.1	18	4	2017-12-15	2	2	0	0			- -
677	2017-12-15 11:00	1-2	30	GnRH-antagonist	19.72	primary	tubal	4	IVF	NA	7.7	5.7	33.39	17.44	4	4008	4.54	0.706	NA	13	2	2017-12-18	2	2	0	1	intrauterine pregnancy		2018-08-06	35	Cesarean	male	2.1	female	2.05
678	2017-12-16 08:30	1-2	30	GnRH-antagonist	25	secondary	tubal	0	IVF	1.943	8.37	4.78	17.68	16.78	3	3410	2.23	1.16	7.5	13	2	2017-12-19	2	2	0	0			- -
679	2017-12-16 09:10	0	25	GnRH-antagonist	18.71	primary	male	2	IVF	NA	5.45	8.41	26	8.4	1	1785	5.34	0.606	10.7	18	2	2017-12-19	2	1	0	1	intrauterine pregnancy	yes	- -
680	2017-12-16 10:40	0	27	GnRH-antagonist	26.31	primary	tubal	2	IVF	8.817	8.38	8.45	17.7	14.67	1	1649	11.48	0.126	13.5	8	2	2017-12-19	2	2	0	1	intrauterine pregnancy		2018-09-01	38	vaginal	male	2.9
681	2017-12-18 08:50	0	28	GnRH-antagonist	17.31	primary	tubal	7	IVF	1.337	9.1	8.85	17.35	14.96	1	951.8	1.82	0.224	11.4	4	2	2017-12-21	2	1	0	1	intrauterine pregnancy		2018-08-27	37	Cesarean	female	2.55
682	2017-12-18 09:00	0	42	GnRH-antagonist	26.64	secondary	tubal	4	IVF	NA	5.47	2.04	33.63	15.66	1	916.2	3.17	0.429	7.6	4	3	2017-12-21	2	2	0	0			- -
683	2017-12-19 09:00	0	32	GnRH-antagonist	19.38	primary	tubal	2	IVF	4.8	5.43	4.52	48.74	12.13	2	2165	5.95	1.19	13.7	11	2	2017-12-22	2	2	0	1	intrauterine pregnancy		2018-08-29	38	Cesarean	male	2.65	male	2.7
684	2017-12-20 09:00	0	39	GnRH-antagonist	23.83	primary	Mixed	15	IVF	2.353	8.27	4.53	4	12	1	1174	2.74	0.638	11.3	5	4	2017-12-23	2	1	0	0			- -
685	2017-12-22 08:40	0	36	GnRH-antagonist	26.67	secondary	tubal	4	IVF	9.811	5.25	4.41	14.73	6.27	1	1861	2.54	0.251	13.2	12	2	2017-12-25	2	2	0	1	intrauterine pregnancy	yes	- -
686	2017-12-23 08:50	0	27	GnRH-antagonist	17.22	primary	male	4	ICSI	6.703	5.14	4.75	30.47	12.37	4	4308	2.31	0.577	10	16	2	2017-12-26	2	2	0	1	intrauterine pregnancy		2018-09-18	40	vaginal	female	3.06
687	2017-12-23 09:45	0	33	GnRH-antagonist	15.43	primary	Unexplained	2	IVF	NA	9.59	6.22	25.73	11.73	2	2527	1.09	0.343	8.6	17	1	2017-12-26	1	1	0	0			- -
688	2017-12-24 09:40	0	26	GnRH-antagonist	20.96	primary	tubal	3	IVF	1.03	6.94	4.49	79.21	18.28	1	1831	5.84	0.667	10	6	5	2017-12-27	2	1	0	0			- -
689	2017-12-25 09:00	0	33	GnRH-antagonist	24.03	primary	tubal	4	IVF	0.418	10.64	6.52	22.25	13.82	1	1550	2.77	0.549	10.2	12	2	2017-12-28	2	2	0	1	intrauterine pregnancy		2018-09-10	39	Cesarean	male	3.4
690	2017-12-27 08:42	≥3	45	GnRH-antagonist	29.24	secondary	Mixed	4	IVF	NA	15.97	5.92	13.62	16.01	1	764.5	10.7	0.258	12.9	2	2	2017-12-30	2	1	0	0			- -
691	2017-12-27 08:50	1-2	41	GnRH-antagonist	25.1	secondary	tubal	1	IVF	NA	9.3	2.9	39	14.26	1	364.9	1.38	0.321	6.8	5	3	2017-12-30	2	2	0	0			- -
692	2017-12-27 09:50	0	31	GnRH-antagonist	23.05	secondary	tubal	1	IVF	1.234	12.34	8.06	41.45	17.03	1	1446	1.09	0.494	14.5	15	2	2017-12-30	2	1	0	1	intrauterine pregnancy		2018-09-11	38	vaginal	male	2.8
693	2017-12-31 09:45	0	22	GnRH-antagonist	24.65	primary	tubal	1	IVF	1.53	7.05	4.12	29.7	18.8	2	2305	4.16	0.571	9	12	2	2018-01-03	2	2	0	1	intrauterine pregnancy		2018-10-03	41	vaginal	female	3.2
694	2018-01-02 09:15	1-2	43	GnRH-antagonist	25.2	secondary	male	0	ICSI	NA	7.14	2.88	24.8	16.56	2	2278	1.67	1.3	11	9	2	2018-01-05	2	2	0	0			- -
695	2018-01-05 08:45	0	40	GnRH-antagonist	21.78	secondary	Endometriosis	2	IVF	0.414	9.3	11.45	29.56	21.28	1	1755	7.72	0.887	10.2	4	2	2018-01-08	2	2	0	0			- -
696	2018-01-07 08:35	0	25	GnRH-antagonist	19.22	primary	tubal	2	IVF	2.803	6.64	7.65	5	11.04	1	1550	9.2	0.189	11	11	1	2018-01-10	1	1	0	0			- -
697	2018-01-09 09:25	0	37	GnRH-antagonist	21.5	secondary	tubal	1	IVF	0.664	3.6	1.33	53	17.78	1	1572	1.64	0.9	9.2	9	2	2018-01-12	2	2	0	0			- -
698	2018-01-14 10:06	0	40	GnRH-antagonist	23.53	secondary	tubal	3	IVF	2.609	5.47	5.96	27.24	12.38	3	3882	6.38	0.718	8.4	12	3	2018-01-17	2	2	0	0			- -
699	2018-01-16 09:03	0	31	GnRH-antagonist	NA	primary	Mixed	1	IVF	0.203	11.32	6.24	72.41	15.11	1	1184	2.07	0.276	9	6	2	2018-01-19	2	2	0	1	intrauterine pregnancy		2018-10-01	39	Cesarean	female	2.5	female	3
700	2018-01-17 09:40	0	26	GnRH-antagonist	21.3	secondary	tubal	1	IVF	8.895	8.81	9.83	32.81	15.64	2	2049	4.29	0.925	7.9	16	2	2018-01-20	2	2	0	0			- -
701	2018-01-19 09:00	0	21	GnRH-antagonist	20.89	secondary	tubal	1	IVF	2.804	1.8	1.5	5.6	12.97	1	977	1.44	0.286	11.3	4	3	2018-01-22	1	1	0	1	intrauterine pregnancy		2018-10-12	39	vaginal	male	3.15
702	2018-01-19 09:40	≥3	38	GnRH-antagonist	20.31	secondary	tubal	7	IVF	NA	7.53	5.85	42.89	20.79	3	3918	3.25	1.23	9	13	4	2018-01-22	2	1	0	0			- -
703	2018-01-20 09:45	0	28	GnRH-antagonist	18.07	primary	male	3	ICSI	1.507	6.05	5.37	29.23	12.54	3	3138	1.8	0.49	11	17	2	2018-01-23	2	2	0	1	intrauterine pregnancy		2018-10-12	39	vaginal	female	3
704	2018-01-22 10:05	0	40	GnRH-antagonist	24.65	secondary	tubal	14	IVF	7.323	5.93	5.06	16.19	7.28	1	1624	6.01	0.436	11.9	8	4	2018-01-25	2	2	0	1	intrauterine pregnancy		2018-09-28	38	Cesarean	male	2.6	female	2.45
705	2018-01-22 10:30	0	33	GnRH-antagonist	17.75	secondary	tubal	1	IVF	NA	9.31	3.65	43.19	22.55	1	1983	8.72	0.615	8.9	8	2	2018-01-25	2	1	0	0			- -
706	2018-01-25 10:05	0	28	GnRH-antagonist	29.59	secondary	Mixed	1	IVF	7.676	5.64	10.39	31.02	7.14	2	2071	10.26	0.433	9.9	12	2	2018-01-28	2	2	0	1	intrauterine pregnancy		2018-10-09	38	Cesarean	male	4.25
707	2018-01-30 09:50	0	39	GnRH-antagonist	24	secondary	tubal	2	IVF	0.773	10.78	4.04	10.33	20.08	1	1768	9.55	1.05	9.5	7	2	2018-02-02	2	2	0	1	intrauterine pregnancy		2018-10-21	39	Cesarean	female	3.7
708	2018-03-03 08:40	0	41	GnRH-antagonist	22.31	secondary	Ovulatory	2	IVF	1.916	7.59	5.05	35	9.33	2	2918	4.13	0.476	7.4	12	6	2018-03-06	2	2	0	1	intrauterine pregnancy		2018-11-16	38	Cesarean	female	3
709	2018-03-06 09:35	1-2	38	GnRH-antagonist	28.3	secondary	tubal	0	IVF	1.5	4.34	5.07	45.5	10.17	1	708.6	2.36	0.279	10.4	5	2	2018-03-09	2	2	0	0			- -
710	2018-03-15 09:10	0	38	GnRH-antagonist	42.97	secondary	tubal	1	IVF	1.99	4.19	2.42	28.88	10.67	4	4482	5.38	1.32	9	10	2	2018-03-18	2	2	0	1	intrauterine pregnancy		2018-11-28	38	Cesarean	female	3.55
711	2018-03-18 08:43	0	40	GnRH-antagonist	22.06	secondary	tubal	2	IVF	0.583	7.77	5.25	51.22	16.05	1	779.1	4.77	0.264	6.3	2	2	2018-03-21	2	2	0	0			- -
712	2018-03-19 08:55	0	22	GnRH-antagonist	24.8	secondary	male	2	ICSI	14.323	5.85	7.94	24.07	6.95	1	468.5	2.95	0.176	8.4	2	2	2018-03-22	2	2	0	1	intrauterine pregnancy		2018-11-19	37	Cesarean	female	3.3	female	3.2
713	2018-03-19 09:10	0	30	GnRH-antagonist	24.61	secondary	tubal	5	IVF	1.76	1.56	2.27	18.13	18.04	1	1546	3.1	0.722	11.1	7	2	2018-03-22	2	2	0	1	intrauterine pregnancy		2018-12-09	40	Cesarean	female	3.9
714	2018-03-19 09:30	0	30	GnRH-antagonist	22.22	primary	Ovulatory	3	IVF	33.428	4.55	4.97	32.89	7.19	3	3558	3.7	0.327	8.5	16	2	2018-03-22	2	2	0	0			- -
715	2018-03-22 08:30	1-2	43	GnRH-antagonist	27.34	secondary	Unexplained	1	IVF	2.313	8.4	3.23	36.83	17.55	1	811.9	7.64	0.313	11.9	4	3	2018-03-25	2	1	0	0			- -
716	2018-03-24 09:10	1-2	43	GnRH-antagonist	19.81	secondary	tubal	0	IVF	0.952	10.82	6.75	57.16	16.95	2	2127	7.4	0.786	9.9	4	3	2018-03-27	2	2	0	1	intrauterine pregnancy	yes	- -
717	2018-03-25 08:55	0	34	GnRH-antagonist	21.64	secondary	tubal	5	IVF	0.39	10.92	6.6	23.21	22.11	1	543.5	3.8	0.284	12.7	2	1	2018-03-28	1	1	0	0			- -
718	2018-03-25 09:08	1-2	39	GnRH-antagonist	24.84	secondary	tubal	12	IVF	1.423	9.87	5.08	39.63	16.36	1	1126	4.51	0.255	8.3	5	2	2018-03-28	2	2	0	1	intrauterine pregnancy	yes	- -
719	2018-03-27 08:52	0	22	GnRH-antagonist	27.34	secondary	tubal	1	IVF	5.58	6.59	5.53	44.68	10.16	2	2323	2.54	0.441	17.2	15	2	2018-03-30	2	1	0	1	ectopic pregnancy		- -
720	2018-03-28 08:20	1-2	36	GnRH-antagonist	22.66	secondary	tubal	4	IVF	0.436	5.148	3.426	58.103	16.64	2	2232	4.32	0.55	7.8	5	2	2018-03-31	2	2	0	1	intrauterine pregnancy	yes	- -
721	2018-03-30 08:40	1-2	43	GnRH-antagonist	20.7	secondary	Mixed	1	IVF	0.304	4.74	3.4	68.37	19.61	1	1028	2	0.777	8.3	5	2	2018-04-02	2	2	0	0			- -
722	2018-03-30 08:50	0	36	GnRH-antagonist	18.31	primary	male	5	ICSI	0.89	7.52	5.29	68.47	19.32	3	3010	1.21	1.26	10.1	12	2	2018-04-02	2	1	0	1	intrauterine pregnancy		2018-11-26	36	Cesarean	male	2	male	1.6
723	2018-03-30 09:25	0	38	GnRH-antagonist	18.29	primary	Ovulatory	2	IVF	1.875	5.67	4.72	29.94	19.18	3	3744	2.46	0.735	12.6	17	2	2018-04-02	2	2	0	1	intrauterine pregnancy		2018-12-12	38	Cesarean	female	3
724	2018-04-05 09:00	0	26	GnRH-antagonist	26.04	primary	tubal	7	IVF	7.083	2.12	3.78	42.85	9.67	3	3010	3.15	0.793	12	14	3	2018-04-08	2	1	0	1	intrauterine pregnancy		2018-12-06	38	Cesarean	male	2.5	female	3
725	2018-04-08 08:40	0	33	GnRH-antagonist	23.59	primary	tubal	3	IVF	0.455	12.76	4.62	23.17	15.99	1	608.5	2.09	0.197	11.7	3	1	2018-04-11	1	1	0	0			- -
726	2018-04-08 08:50	1-2	40	GnRH-antagonist	22.68	secondary	tubal	2	IVF	2.03	6.94	3.58	64.18	16.31	2	2723	10.4	0.972	8.2	9	6	2018-04-11	2	1	0	0			- -
727	2018-04-10 09:42	0	36	GnRH-antagonist	20.96	secondary	Mixed	2	IVF	0.648	11.72	4.87	25.23	14.06	1	619.2	1.21	0.326	8.3	5	3	2018-04-13	2	1	0	1	intrauterine pregnancy		2018-12-19	37	Cesarean	male	2.8
728	2018-04-10 10:05	0	39	GnRH-antagonist	24.39	secondary	Ovulatory	5	IVF	9.794	4.25	5.73	43.53	6.21	3	3228	3.29	0.422	9.1	7	1	2018-04-13	1	1	0	0			- -
729	2018-04-11 09:10	0	37	GnRH-antagonist	24.97	secondary	tubal	3	IVF	2.203	8.94	7.58	75.87	13.3	1	1128	1.81	0.35	11.1	8	2	2018-04-14	2	1	0	0			- -
730	2018-04-11 09:30	0	27	GnRH-antagonist	19.1	primary	male	1	ICSI	6.078	5.96	3.54	31.86	13.81	2	2376	4.86	0.416	12.2	17	4	2018-04-14	2	2	0	0			- -
731	2018-04-12 08:45	0	26	GnRH-antagonist	19.63	primary	Ovulatory	1	IVF	5.765	5.77	4.72	39.18	10.4	3	3614	2.21	1.06	13.3	13	2	2018-04-15	2	2	0	1	intrauterine pregnancy		2019-01-02	39	vaginal	male	3.7
732	2018-04-13 08:40	0	27	GnRH-antagonist	23.23	primary	Mixed	1	IVF	0.074	9.86	6.47	15.63	14.92	1	1268	8.1	0.458	13.7	4	4	2018-04-16	2	2	0	0			- -
733	2018-04-13 09:27	0	28	GnRH-antagonist	22.57	primary	male	2	ICSI	1.528	5.93	4.86	21.1	15.03	2	2175	5.39	0.51	11.7	10	2	2018-04-16	2	1	0	1	intrauterine pregnancy		2019-01-04	39	vaginal	female	3.3
734	2018-04-14 09:10	0	42	GnRH-antagonist	22.77	secondary	Mixed	1	IVF	0.463	9.54	2.68	41.14	11.23	1	1080	2.56	0.64	11.3	5	4	2018-04-17	2	1	0	1	intrauterine pregnancy	yes	- -
735	2018-04-14 09:20	0	30	GnRH-antagonist	23.63	secondary	Endometriosis	2	IVF	8.407	5.54	2.92	31.29	6.84	2	2022	2.13	0.392	9.6	10	2	2018-04-17	2	2	0	1	intrauterine pregnancy		2018-12-18	37	Cesarean	male	2.5	female	3
736	2018-04-15 08:50	0	43	GnRH-antagonist	17.97	secondary	male	2	IVF	0.866	11.53	7.54	36.26	18.62	2	2426	5.52	0.326	11.3	8	4	2018-04-18	2	2	0	0			- -
737	2018-04-15 09:06	0	25	GnRH-antagonist	20.89	secondary	tubal	2	IVF	5.073	6.42	5.22	20.52	12.33	3	3318	2.7	1.08	9.1	15	2	2018-04-18	2	2	0	1	intrauterine pregnancy		2019-01-02	38	vaginal	male	3.2
738	2018-04-16 09:15	0	37	GnRH-antagonist	20.89	secondary	male	5	IVF	1.514	7.18	5.56	30.26	12.66	1	965.7	3.3	0.48	8	6	2	2018-04-19	2	1	0	0			- -
739	2018-04-16 09:55	0	30	GnRH-antagonist	25.3	primary	Ovulatory	3	IVF	3.612	2.65	4.63	62.37	14.5	4	4856	7.24	NA	9	13	5	2018-04-19	2	1	0	1	intrauterine pregnancy		2019-01-06	39	vaginal	female	3.3
740	2018-04-16 10:55	0	31	GnRH-antagonist	19.56	primary	male	2	ICSI	6.342	10	9.21	29	13.89	3	3670	4.11	0.46	10.3	9	2	2018-04-19	2	2	0	1	intrauterine pregnancy		2018-12-24	37	vaginal	male	3.1
741	2018-04-17 08:35	0	35	GnRH-antagonist	19.2	secondary	tubal	5	IVF	6.713	5.69	4.55	54.46	13.51	1	1552	2.2	0.39	7.6	7	1	2018-04-20	1	1	0	1	intrauterine pregnancy		2018-12-15	35	vaginal	male	1.8
742	2018-04-18 09:25	0	30	GnRH-antagonist	19.91	primary	tubal	4	IVF	9.371	6.02	5.86	26.85	8.3	3	3286	2.06	0.32	13	13	2	2018-04-21	2	1	0	1			- -
743	2018-04-19 09:03	1-2	42	GnRH-antagonist	21.37	secondary	tubal	3	IVF	NA	8.69	5.3	18.92	14.92	1	1277	6.63	0.316	14.9	6	2	2018-04-22	2	1	0	0			- -
744	2018-04-19 10:23	0	42	GnRH-antagonist	26.67	secondary	tubal	1	IVF	1.057	12.06	5.22	24.89	21.05	1	1466	6.43	0.664	8.5	7	3	2018-04-22	2	2	0	0			- -
745	2018-04-21 09:00	1-2	33	GnRH-antagonist	20.55	secondary	tubal	1	IVF	3.392	8.13	3.61	50.2	16.93	1	1232	7.45	0.325	9.2	3	3	2018-04-24	2	2	0	0			- -
746	2018-04-22 08:40	≥3	45	GnRH-antagonist	21.88	secondary	tubal	15	IVF	1.583	7.29	2.49	40.27	12.29	1	1650	3.39	0.224	11.7	4	2	2018-04-25	2	1	0	0			- -
747	2018-04-23 08:40	0	33	GnRH-antagonist	19.07	secondary	tubal	2	IVF	6.753	9.85	6.03	4	11.06	1	1918	2.79	0.303	9.8	9	2	2018-04-26	2	2	0	1	intrauterine pregnancy		2018-12-25	37	Cesarean	male	2.3	female	2.2
748	2018-04-23 09:10	0	30	GnRH-antagonist	18.44	secondary	tubal	4	IVF	9.047	8.34	8.57	51.15	9.26	4	4350	4.71	0.715	9.3	12	2	2018-04-26	2	2	0	1	intrauterine pregnancy		2018-11-30	33	Cesarean	male	1.97	female	1.95
749	2018-04-24 10:00	0	29	GnRH-antagonist	22.03	primary	male	2	ICSI	3.131	9.35	6.18	33.38	9.86	1	1322	1.77	0.495	11.5	11	2	2018-04-27	2	2	0	1	intrauterine pregnancy		2019-01-17	40	Cesarean	female	3.2
750	2018-04-26 08:45	0	38	GnRH-antagonist	24.34	primary	Mixed	4	IVF	0.282	7.05	3.4	69	21.48	2	2635	1.96	0.492	12.1	5	2	2018-04-29	2	1	0	0			- -
751	2018-04-28 09:10	0	39	GnRH-antagonist	27.01	secondary	tubal	8	IVF	1.341	6.31	2.78	39.4	13.7	1	1088	5.75	0.624	12.1	4	3	2018-05-01	2	2	0	1	intrauterine pregnancy		2019-01-21	39	vaginal	male	3.5
752	2018-04-30 09:00	0	45	GnRH-antagonist	22.31	secondary	tubal	2	IVF	0.494	12.77	6.37	18.06	11.64	1	887.6	2.66	0.47	9	5	4	2018-05-03	2	1	0	0			- -
753	2018-05-01 09:15	1-2	34	GnRH-antagonist	18.96	secondary	male	2	ICSI	13.267	5.62	3.39	38.3	11.48	1	1172	0.207	1.1	11.4	17	2	2018-05-04	2	2	0	0			- -
754	2018-05-02 10:00	0	32	GnRH-antagonist	22.1	secondary	tubal	2	IVF	4.907	6.44	3.83	38.7	10.07	2	2550	2.7	0.505	9.2	16	2	2018-05-05	2	2	0	1	intrauterine pregnancy		2018-12-29	36	Cesarean	male	2.1	male	2.4
755	2018-05-02 10:35	0	34	GnRH-antagonist	20.06	primary	male	4	ICSI	5.645	5.77	4.85	38.08	13.65	2	2519	0.87	0.477	10.4	12	4	2018-05-05	2	2	0	1	intrauterine pregnancy		2018-11-17	30	Cesarean	male	1.63	female	1.3
756	2018-05-04 09:55	0	30	GnRH-antagonist	28.93	primary	tubal	10	IVF	2.268	6.14	3.23	27.35	14.66	2	2567	2.98	0.707	11.9	12	2	2018-05-07	2	2	0	1	intrauterine pregnancy		2019-01-29	40	Cesarean	female	3.4
757	2018-05-07 08:50	0	30	GnRH-antagonist	20.32	primary	tubal	1	IVF	3.06	7.03	4.9	37.51	12.24	1	1220	0.574	0.158	11	11	2	2018-05-10	2	1	0	1	intrauterine pregnancy		2018-12-25	34	Cesarean	male	1.68	female	2.08
758	2018-05-11 11:25	0	29	GnRH-antagonist	19.23	primary	male	2	IVF	2.966	8.27	5.33	56.13	18.92	2	2011	3.49	0.811	12.4	9	3	2018-05-14	1	1	0	0			- -
759	2018-05-12 08:50	0	39	GnRH-antagonist	22.72	secondary	Ovulatory	2	IVF	2.657	4.81	3.59	41.27	12.21	1	1832	2.99	0.504	15	7	3	2018-05-15	2	1	0	0			- -
760	2018-05-13 08:30	0	40	GnRH-antagonist	19.6	secondary	tubal	3	IVF	1.094	8.91	3.85	37.06	11.99	1	659.7	2.17	0.05	12	3	2	2018-05-16	1	1	0	1	intrauterine pregnancy	yes	- -
761	2018-05-13 09:00	1-2	33	GnRH-antagonist	21.26	primary	male	6	ICSI	2.283	9.57	7.55	34.07	17.8	1	1059	2.92	0.183	10.7	6	2	2018-05-16	2	2	0	0			- -
762	2018-05-14 08:45	1-2	44	GnRH-antagonist	20.81	secondary	Ovulatory	5	IVF	1.798	10.52	5.51	24.29	22.26	1	1429	2.83	0.528	11.7	7	2	2018-05-17	2	2	0	0			- -
763	2018-05-15 08:40	0	42	GnRH-antagonist	25.81	secondary	male	2	IVF	0.904	10.06	6.16	38.49	14.14	1	736	3.33	0.201	8.5	5	2	2018-05-18	2	1	0	0			- -
764	2018-05-16 09:50	0	21	GnRH-antagonist	18.42	primary	tubal	2	IVF	4.474	5.7	6.6	30.34	10.43	2	2222	2.09	0.37	9.8	19	2	2018-05-19	2	1	1	1	intrauterine pregnancy		2019-01-01	34	Cesarean	male	2.15	female	2.45
765	2018-05-17 09:40	0	40	GnRH-antagonist	22.19	secondary	tubal	7	IVF	3.421	6.5	4	62.06	16.4	3	3544	3.3	0.916	9.3	15	2	2018-05-20	2	1	0	0			- -
766	2018-05-17 10:15	0	33	GnRH-antagonist	25.64	secondary	tubal	9	IVF	7.918	7.22	4.29	29.32	9.25	2	2162	4.49	0.376	11.9	8	2	2018-05-20	2	1	0	1	ectopic pregnancy		- -
767	2018-05-17 10:30	0	27	GnRH-antagonist	22.96	secondary	tubal	4	IVF	2.816	4.31	3.1	33.47	12.03	4	4424	1.71	0.895	9.4	12	2	2018-05-20	2	1	0	1	ectopic pregnancy		- -
768	2018-05-18 08:50	1-2	32	GnRH-antagonist	21.36	primary	Mixed	8	IVF	NA	9.34	3	44.88	14.71	1	1039	3.05	0.069	9.2	4	3	2018-05-21	2	1	0	0			- -
769	2018-05-18 09:10	0	28	GnRH-antagonist	19.53	secondary	tubal	1	IVF	16.26	6.44	3.56	59.13	10.56	1	1377	5.55	0.181	7.6	5	2	2018-05-21	2	1	0	1	intrauterine pregnancy		2019-01-08	36	vaginal	male	2.65	female	2.65
770	2018-05-19 09:08	0	29	GnRH-antagonist	20.96	primary	tubal	4	IVF	8.844	6.76	9.59	48.04	8.36	3	3513	4.2	0.134	9.4	10	2	2018-05-22	2	1	0	0			- -
771	2018-05-20 08:50	1-2	45	GnRH-antagonist	29.75	secondary	tubal	2	IVF	1.116	4.71	3.71	25.61	7.11	1	1995	2.28	0.136	10.5	7	4	2018-05-23	2	2	0	1	intrauterine pregnancy	yes	- -
772	2018-05-20 09:10	0	36	GnRH-antagonist	23.73	secondary	male	1	ICSI	1.399	7.83	4.6	38.41	15.29	2	2761	2.51	0.474	9.8	5	5	2018-05-23	2	1	0	0			- -
773	2018-05-20 09:25	1-2	26	GnRH-antagonist	20.96	primary	tubal	3	IVF	1.03	6.94	4.49	65.07	20.12	1	1921	1.06	0.496	10	10	2	2018-05-23	2	2	0	0			- -
774	2018-05-20 09:45	1-2	36	GnRH-antagonist	24.03	secondary	tubal	6	IVF	1.67	6.4	4.7	38.14	10.66	2	2548	3.9	0.531	11.6	5	3	2018-05-23	2	1	0	0			- -
775	2018-05-20 10:15	0	28	GnRH-antagonist	17.85	secondary	male	1	ICSI	3.188	5.91	5.01	30.46	13.26	2	2820	2.9	0.299	7.6	9	1	2018-05-23	1	1	0	0			- -
776	2018-05-22 08:55	0	25	GnRH-antagonist	19.22	secondary	tubal	5	IVF	7.146	8.78	4.07	13.52	10.9	2	2458	7.23	0.165	11.4	4	2	2018-05-25	2	1	0	1	intrauterine pregnancy		2019-02-02	37	vaginal	female	2.5
777	2018-05-22 10:15	0	37	GnRH-antagonist	20	primary	male	13	ICSI	2.78	5.81	5.73	27.16	18.32	3	3310	4.72	0.817	15.3	11	2	2018-05-25	2	2	0	1	intrauterine pregnancy		2019-01-27	36	Cesarean	female	3.29
778	2018-05-24 09:10	0	38	GnRH-antagonist	38.29	primary	male	5	IVF	2.6	8.5	6.29	58.24	18.8	3	3324	3.87	0.588	10.8	11	4	2018-05-27	2	1	0	0			- -
779	2018-05-25 08:53	≥3	39	GnRH-antagonist	21.03	secondary	tubal	16	IVF	0.08	11.35	5.5	68.52	14.85	1	1302	7.77	0.623	8.2	3	3	2018-05-28	2	1	0	0			- -
780	2018-05-25 09:10	0	29	GnRH-antagonist	19.53	secondary	tubal	5	IVF	5.11	9.94	5.71	36.74	10.38	1	1405	2.58	0.168	7.3	4	4	2018-05-28	2	2	0	1	heterotopic pregnancy		2019-01-12	39	Cesarean	male	2.95
781	2018-05-28 08:40	1-2	37	GnRH-antagonist	22.31	secondary	Unexplained	4	IVF	0.552	5.98	4.98	47.36	14.93	1	870.8	5.21	0.37	8.2	4	4	2018-05-31	2	2	0	1	ectopic pregnancy		- -
782	2018-05-28 09:20	0	31	GnRH-antagonist	20.03	secondary	tubal	2	IVF	2.546	7.41	4.56	36.72	13.9	1	1583	2.23	0.508	10.6	10	2	2018-05-31	2	1	0	1	intrauterine pregnancy		2019-01-28	36	Cesarean	female	2.95
783	2018-05-29 09:05	0	37	GnRH-antagonist	19.81	primary	Ovulatory	2	IVF	0.9	9.83	6.11	60.84	23.48	1	1518	4.08	0.173	11	3	3	2018-06-01	2	1	0	1	intrauterine pregnancy		2019-01-07	34	Cesarean	female	2.1
784	2018-05-31 09:40	0	39	GnRH-antagonist	25.11	secondary	tubal	7	IVF	0.7	9.5	3.6	46.9	17.89	1	1334	2.81	0.232	10	7	2	2018-06-03	2	2	0	0			- -
785	2018-05-31 09:50	0	29	GnRH-antagonist	21.45	primary	tubal	4	IVF	8.856	5.46	5.27	22.16	11.47	3	3730	1.9	1.02	11.1	14	2	2018-06-03	2	2	0	1	intrauterine pregnancy		2019-02-23	39	Cesarean	female	3.35
786	2018-06-01 08:40	0	34	GnRH-antagonist	22.02	secondary	tubal	8	IVF	7.02	8.3	6.04	24.18	23.42	3	3010	2.36	0.579	12.1	10	2	2018-06-04	2	2	0	0			- -
787	2018-06-02 09:25	0	27	GnRH-antagonist	19.23	secondary	male	3	IVF	4.57	7.81	6.34	41.8	10.91	1	949.2	2.06	0.083	11.8	6	3	2018-06-05	2	2	0	0			- -
788	2018-06-02 09:50	0	31	GnRH-antagonist	20.4	primary	male	4	IVF	6.587	6.73	3.05	30.14	16.08	2	2970	1.64	0.556	9	20	2	2018-06-05	2	1	0	1	intrauterine pregnancy		2019-02-23	39	vaginal	female	3.4
789	2018-06-03 08:45	≥3	42	GnRH-antagonist	22.03	primary	tubal	18	IVF	NA	6.27	5.17	34.74	20.82	1	444.8	1.77	0.05	7	3	2	2018-06-06	2	1	0	0			- -
790	2018-06-03 09:05	0	26	GnRH-antagonist	21.23	secondary	tubal	2	IVF	7.355	8.09	5.69	28.92	12.92	4	4496	1.27	0.531	9.6	14	1	2018-06-06	1	1	0	0			- -
791	2018-06-06 08:46	0	30	GnRH-antagonist	26.45	primary	male	5	ICSI	2.62	5.92	5.52	38.58	12.62	1	1447	7.89	0.553	10	9	2	2018-06-09	2	2	0	1	intrauterine pregnancy		2019-02-14	37	Cesarean	female	3	female	2.8
792	2018-06-07 09:00	≥3	39	GnRH-antagonist	29.3	secondary	tubal	12	IVF	0.62	7.35	2.32	59.31	11.78	1	907.7	6.97	0.685	10.7	5	3	2018-06-10	2	1	0	0			- -
793	2018-06-07 09:30	0	30	GnRH-antagonist	20.28	secondary	tubal	1	IVF	6.187	4.96	3.89	44.04	10	1	1279	2.06	0.142	9.6	7	2	2018-06-10	2	2	0	1	intrauterine pregnancy	yes	- -
794	2018-06-07 09:55	1-2	27	GnRH-antagonist	22.04	secondary	tubal	6	IVF	5.536	8.32	3.31	31.61	11.71	1	1023	2.67	0.252	10.9	6	3	2018-06-10	2	2	0	0			- -
795	2018-06-08 09:00	0	41	GnRH-antagonist	22.38	secondary	male	1	IVF	1.445	6.23	7.36	20.38	15.33	1	1151	2.45	0.469	8.7	7	2	2018-06-11	2	2	0	1	intrauterine pregnancy	yes	- -
796	2018-06-08 09:15	0	29	GnRH-antagonist	21.23	primary	tubal	12	IVF	9.294	5	6.42	3.03	8.5	1	1609	4.19	0.172	12.7	3	2	2018-06-11	2	2	0	0			- -
797	2018-06-09 08:30	0	36	GnRH-antagonist	21.64	primary	Unexplained	3	IVF	1.368	5.98	5.09	7.19	16.03	2	2563	2.27	1.26	8.7	7	2	2018-06-12	2	1	0	0			- -
798	2018-06-09 09:05	0	30	GnRH-antagonist	18.03	secondary	tubal	3	IVF	2.585	6.69	3.9	54.28	14.02	1	1440	1.06	0.727	9.9	11	2	2018-06-12	2	1	0	1	intrauterine pregnancy	yes	- -
799	2018-06-10 09:07	≥3	43	GnRH-antagonist	21.6	secondary	tubal	0	IVF	0.94	8.74	5.7	37.72	16.28	1	512.5	3.72	0.138	10	2	1	2018-06-13	1	1	0	0			- -
800	2018-06-11 09:25	0	35	GnRH-antagonist	20.31	secondary	tubal	6	IVF	4.403	6.97	8.36	59.83	12.18	3	3111	2.1	0.632	11.1	12	2	2018-06-14	2	2	0	1	intrauterine pregnancy	yes	- -
801	2018-06-13 09:40	0	26	GnRH-antagonist	18.9	secondary	tubal	1	IVF	4.037	7.9	3.33	44.9	13.83	1	1560	1.27	0.742	10.9	8	2	2018-06-16	2	1	0	0			- -
802	2018-06-15 09:56	0	37	GnRH-antagonist	21.5	primary	tubal	9	IVF	4.063	7.19	6.43	34.84	14.31	1	1782	4.89	0.565	8	8	3	2018-06-18	2	1	0	1	intrauterine pregnancy		2019-02-19	38	Cesarean	male	3.5
803	2018-06-16 09:30	0	34	GnRH-antagonist	26.04	primary	male	3	ICSI	9.745	7.51	4.99	25.01	7.13	1	1886	3.99	0.111	10.3	6	4	2018-06-19	2	2	0	1	intrauterine pregnancy		2019-01-29	34	Cesarean	male	2	female	1.25
804	2018-06-17 08:45	0	29	GnRH-antagonist	25.71	primary	tubal	2	IVF	5.89	5.82	3.16	39.67	9.61	2	2819	1.36	0.497	8.8	8	2	2018-06-20	2	2	0	1	intrauterine pregnancy		2019-02-21	37	Cesarean	male	3.3	male	2.65
805	2018-06-19 08:55	0	31	GnRH-antagonist	20.4	primary	male	9	ICSI	4.417	6.68	5.41	46.8	13.29	1	1764	1.79	0.281	12.3	14	4	2018-06-22	2	1	0	1	intrauterine pregnancy		2019-03-08	39	vaginal	male	3
806	2018-06-19 09:05	0	32	GnRH-antagonist	20.31	secondary	tubal	1	IVF	1.933	6.67	5.54	37.59	15.26	2	2420	1.73	0.843	7	11	2	2018-06-22	2	2	0	0			- -
807	2018-06-21 10:10	≥3	31	GnRH-antagonist	25.63	secondary	tubal	0	IVF	0.056	9.53	4.99	5	16.39	1	931.2	1.56	0.298	9.1	4	2	2018-06-24	2	1	0	0			- -
808	2018-06-24 08:40	0	35	GnRH-antagonist	24.61	secondary	tubal	10	IVF	19	6.25	7.4	28.68	11.14	2	2203	12.57	0.755	18.1	9	4	2018-06-27	2	1	0	1	intrauterine pregnancy		2019-01-28	34	Cesarean	male	2.4	female	1.9
809	2018-06-24 09:15	0	37	GnRH-antagonist	19.91	secondary	tubal	1	IVF	5.867	6.4	6.67	34.18	18.4	1	1038	2.6	0.264	9.5	6	4	2018-06-27	2	1	0	1	intrauterine pregnancy		2019-03-27	42	Cesarean	male	3.3
810	2018-06-24 09:25	0	44	GnRH-antagonist	22.83	secondary	male	1	IVF	2.25	6.08	5.23	51.25	15.85	1	1721	0.932	0.123	9	5	2	2018-06-27	2	2	0	0			- -
811	2018-06-26 09:00	0	25	GnRH-antagonist	20.7	secondary	tubal	2	IVF	8.01	5.99	5.06	29.56	13.83	2	2114	2.2	0.33	10.1	14	2	2018-06-29	2	2	0	1	intrauterine pregnancy		2019-03-06	37	vaginal	male	3.45
812	2018-06-26 09:05	0	31	GnRH-antagonist	27.55	secondary	tubal	9	IVF	5.537	5.79	3.08	19.25	10.39	2	2210	7.27	0.367	11.5	13	2	2018-06-29	2	1	0	0			- -
813	2018-06-27 08:55	0	32	GnRH-antagonist	19.53	secondary	tubal	3	IVF	3.551	7.24	7.3	24	12.92	2	2015	4.57	0.326	9.8	7	2	2018-06-30	2	2	0	0			- -
814	2018-06-27 09:40	0	34	GnRH-antagonist	21.08	secondary	male	2	ICSI	NA	9.45	7.81	50.87	13.25	3	3698	3.37	1.04	9.6	13	1	2018-06-30	1	1	0	0			- -
815	2018-06-29 08:45	0	37	GnRH-antagonist	21.78	secondary	tubal	1	IVF	0.953	10.54	5.58	25.04	14.53	1	1442	7.2	0.977	10.8	10	2	2018-07-02	2	1	0	0			- -
816	2018-07-01 08:40	0	28	GnRH-antagonist	27.24	primary	tubal	4	IVF	1.65	6.82	4.96	70.46	15.13	1	600.9	3.34	0.456	9.9	2	1	2018-07-04	1	1	0	1	intrauterine pregnancy		2019-03-20	39	Cesarean	male	3.15
817	2018-07-01 09:30	0	28	GnRH-antagonist	21.9	secondary	male	7	ICSI	8.88	1.42	4.94	26.91	8.19	4	4293	2.17	0.269	8.7	19	4	2018-07-04	2	2	0	1	intrauterine pregnancy		2019-04-01	40	vaginal	female	3.65
818	2018-07-02 09:00	0	34	GnRH-antagonist	22.67	secondary	tubal	1	IVF	2.041	10.72	2.85	32.47	22.68	1	1752	4.09	0.302	10.4	5	4	2018-07-05	2	2	0	1	intrauterine pregnancy		2019-03-14	37	vaginal	male	3
819	2018-07-04 09:03	0	34	GnRH-antagonist	18.86	primary	male	4	IVF	1.11	6.72	4.86	38.96	18.85	2	2097	11.34	0.521	8.8	5	2	2018-07-07	2	2	0	0			- -
820	2018-07-04 09:30	0	27	GnRH-antagonist	22.21	primary	male	3	ICSI	1.422	9.02	8.49	38.78	9.63	2	2724	3.61	0.425	9.4	10	2	2018-07-07	2	2	0	1	intrauterine pregnancy		2019-03-08	37	Cesarean	male	3	female	2.6
821	2018-07-05 08:35	0	38	GnRH-antagonist	20.31	secondary	tubal	4	IVF	3.291	7.03	5.37	32.76	16.75	1	1328	2.05	0.203	12.5	5	4	2018-07-08	2	2	0	0			- -
822	2018-07-06 08:55	0	34	GnRH-antagonist	19.11	secondary	tubal	5	IVF	0.838	4.98	4.48	47.44	14.08	3	3951	1.46	0.777	8.2	8	2	2018-07-09	2	2	0	0			- -
823	2018-07-08 09:15	0	27	GnRH-antagonist	23.34	primary	Ovulatory	5	IVF	17.193	5.48	6.92	41.82	6.03	1	1479	2.52	0.077	10	15	2	2018-07-11	2	2	0	1	intrauterine pregnancy		2019-03-16	37	vaginal	male	3.4
824	2018-07-08 09:20	0	27	GnRH-antagonist	16.8	secondary	tubal	1	IVF	3.136	7.09	6.07	20	9.34	2	2339	5.22	0.505	11.2	5	2	2018-07-11	2	1	0	1	intrauterine pregnancy		2019-03-23	38	Cesarean	male	2.75	female	2.45
825	2018-07-08 09:30	0	38	GnRH-antagonist	24.09	secondary	tubal	2	IVF	2.697	6.41	4.55	22.37	15.4	4	4552	3.8	0.569	9.7	17	2	2018-07-11	2	2	0	0			- -
826	2018-07-08 09:40	1-2	45	GnRH-antagonist	22.31	secondary	tubal	2	IVF	0.494	12.77	6.37	18.06	14.38	1	793.3	3.98	0.35	11.2	5	3	2018-07-11	2	2	0	0			- -
827	2018-07-08 09:48	0	30	GnRH-antagonist	20.7	primary	Mixed	1	IVF	NA	8.74	8.41	17.09	11.82	2	2616	3.17	1.06	15.6	14	2	2018-07-11	2	2	0	1	intrauterine pregnancy		2019-03-02	35	vaginal	female	2.1
828	2018-07-09 08:46	1-2	38	GnRH-antagonist	17.63	primary	Mixed	1	IVF	2.05	10.01	6.11	46.58	18.49	1	1116	7.2	0.3	12.1	3	2	2018-07-12	2	1	0	1	intrauterine pregnancy	yes	- -
829	2018-07-09 09:10	0	35	GnRH-antagonist	23.63	primary	male	1	ICSI	4.53	6.56	6.66	23.17	13.72	2	2802	4.6	1.13	8.5	15	2	2018-07-12	2	2	0	1	intrauterine pregnancy		2019-03-27	39	Cesarean	female	3.1
830	2018-07-09 09:20	0	29	GnRH-antagonist	20.51	secondary	tubal	2	IVF	4.938	5.45	3.85	66.04	10.84	3	3704	1.34	1.01	10	10	2	2018-07-12	2	1	0	0			- -
831	2018-07-10 08:30	1-2	39	GnRH-antagonist	22.72	secondary	Ovulatory	2	IVF	2.657	4.81	3.59	41.27	13.05	2	2231	2.4	0.583	17.7	7	2	2018-07-13	2	1	0	1	intrauterine pregnancy	yes	- -
832	2018-07-12 09:16	0	39	GnRH-antagonist	24.45	secondary	tubal	1	IVF	2.05	6.48	1.79	38.67	14.68	1	756.4	2.72	0.173	14.3	5	1	2018-07-15	1	1	0	0			- -
833	2018-07-12 09:45	0	32	GnRH-antagonist	20.43	primary	male	2	IVF	13.657	4.77	2.36	40.13	10.51	2	2720	1.04	0.829	10.5	9	2	2018-07-15	2	2	0	1	intrauterine pregnancy		2019-04-03	39	Cesarean	female	3.65
834	2018-07-12 09:55	0	21	GnRH-antagonist	25.97	primary	tubal	1	IVF	3.894	7.94	3.04	19.2	10.39	1	1469	2.83	0.168	10.3	9	2	2018-07-15	2	2	0	1	intrauterine pregnancy		2019-04-04	39	vaginal	female	3.8
835	2018-07-14 08:50	1-2	35	GnRH-antagonist	21.23	secondary	tubal	3	IVF	1.987	6.85	5.62	26.34	17.73	2	2162	7.83	0.82	7.5	5	3	2018-07-17	2	2	0	1	intrauterine pregnancy		2019-03-15	36	vaginal	male	2.55
836	2018-07-14 09:05	0	30	GnRH-antagonist	19.72	secondary	tubal	3	IVF	2.48	6.15	6.61	44	10.64	2	2481	4.02	0.781	14	10	4	2018-07-17	2	2	0	1	intrauterine pregnancy		2019-03-19	37	Cesarean	male	2.45	male	2.7
837	2018-07-15 08:50	0	37	GnRH-antagonist	17.58	secondary	Unexplained	6	IVF	1.403	7.41	7.99	13.28	19.87	1	735.5	3	0.067	10.6	3	2	2018-07-18	2	1	0	1	intrauterine pregnancy	yes	- -
838	2018-07-16 09:10	1-2	28	GnRH-antagonist	23.42	primary	Mixed	1	IVF	5.59	2.31	1.22	4	15.07	4	4138	1.22	1.14	9.4	16	2	2018-07-19	2	2	0	1	intrauterine pregnancy		2019-04-06	39	Cesarean	female	3.9
839	2018-07-16 09:20	0	31	GnRH-antagonist	21.64	primary	Ovulatory	3	IVF	3.108	5.96	2.23	33.96	16.58	2	2676	2.9	0.522	8	6	4	2018-07-19	2	1	0	1	intrauterine pregnancy		2019-03-27	38	Cesarean	male	2.55	female	2.5
840	2018-07-16 09:40	0	34	GnRH-antagonist	NA	secondary	tubal	2	IVF	1.48	5.76	2.3	51.9	12.07	1	1705	2.09	0.716	11	7	2	2018-07-19	2	2	0	0			- -
841	2018-07-17 09:10	0	27	GnRH-antagonist	22.44	primary	male	4	ICSI	1.552	10.54	3.59	31.36	18.03	1	1086	3.39	0.317	13.3	7	2	2018-07-20	2	2	0	0			- -
842	2018-07-17 09:20	1-2	46	GnRH-antagonist	22.51	secondary	Mixed	2	IVF	1.47	6.81	2.56	48.97	19.26	3	3010	3.71	0.935	8.8	10	5	2018-07-20	2	2	0	0			- -
843	2018-07-17 10:15	1-2	32	GnRH-antagonist	22.89	secondary	male	2	IVF	0.932	7.12	2.21	55.03	16.21	2	2159	2.67	0.285	11.7	11	2	2018-07-20	2	1	0	1	intrauterine pregnancy		2019-04-08	39	vaginal	female	3.3
844	2018-07-20 08:35	0	40	GnRH-antagonist	23.62	secondary	tubal	2	IVF	1.73	9.21	4.78	38.28	13.64	3	3054	3.47	0.807	11.2	6	5	2018-07-23	2	2	0	1	intrauterine pregnancy		2019-04-09	39	Cesarean	male	3.3
845	2018-07-21 08:40	0	37	GnRH-antagonist	21.36	secondary	male	2	IVF	6.716	7.03	6.08	17.32	9.95	2	2623	6.48	0.544	10.8	7	3	2018-07-24	2	1	0	0			- -
846	2018-07-23 08:40	0	33	GnRH-antagonist	25.59	primary	male	6	ICSI	20	5.88	12.1	19.71	4.99	1	1229	7.7	0.317	11	5	4	2018-07-26	2	2	0	1	intrauterine pregnancy	yes	- -
847	2018-07-24 09:10	0	29	GnRH-antagonist	23.23	secondary	tubal	7	IVF	5.627	6.27	3.22	25.57	9.76	3	3206	1.58	1.27	11.9	12	2	2018-07-27	2	2	0	0			- -
848	2018-07-24 10:30	0	39	GnRH-antagonist	21.48	primary	male	6	IVF	2.758	9.11	5.82	32.03	15.14	3	3894	3.8	0.889	9.6	9	2	2018-07-27	2	2	0	0			- -
849	2018-07-25 09:45	0	29	GnRH-antagonist	20.2	primary	Ovulatory	2	IVF	11.385	7.08	7.82	65.72	8.81	2	2925	1.64	0.506	7.6	8	2	2018-07-28	2	1	0	0			- -
850	2018-07-27 08:40	0	28	GnRH-antagonist	25.39	primary	tubal	6	IVF	0.693	12.68	5.76	24.09	8.97	1	590.9	2.14	0.095	10	4	1	2018-07-30	1	1	0	1	intrauterine pregnancy		2019-04-11	38	Cesarean	male	3.25
851	2018-07-27 09:00	0	28	GnRH-antagonist	18.73	primary	Ovulatory	2	IVF	0.758	12.51	5.54	55.21	21.36	1	1327	4.54	0.377	12.2	5	2	2018-07-30	2	1	0	1	intrauterine pregnancy	yes	- -
852	2018-07-29 09:15	0	40	GnRH-antagonist	18.03	primary	male	0	ICSI	2.627	7.71	5.9	21.93	23.39	2	2475	5.19	0.864	10.2	8	4	2018-08-01	2	2	0	0			- -
853	2018-07-30 09:15	1-2	34	GnRH-antagonist	18.75	primary	tubal	4	ICSI	0.738	6.84	6.44	31.59	21.96	2	2333	2.17	1.05	11.3	8	4	2018-08-02	2	1	0	0			- -
854	2018-07-31 10:15	0	20	GnRH-antagonist	20.17	primary	tubal	3	IVF	2.67	1.69	2.96	40.17	15.46	1	1423	2.38	0.565	11.9	5	2	2018-08-03	2	1	0	0			- -
855	2018-07-31 10:30	0	27	GnRH-antagonist	26.3	primary	tubal	4	IVF	27.332	5.3	5.29	36.1	5.06	1	886.8	2.84	0.05	9.7	3	2	2018-08-03	2	1	0	1	intrauterine pregnancy		2019-04-23	39	Cesarean	male	3.05
856	2018-08-01 08:45	0	30	GnRH-antagonist	23.53	secondary	male	4	IVF	0.343	8.72	2.69	23.97	16.06	1	669.5	2.17	0.114	8.5	4	2	2018-08-04	2	2	0	1	intrauterine pregnancy		2019-04-08	37	Cesarean	male	3.5	female	3
857	2018-08-02 09:10	0	34	GnRH-antagonist	22.21	secondary	tubal	14	IVF	3.87	3.94	2.8	32	12.95	1	1725	2.56	0.585	9.4	9	2	2018-08-05	2	1	0	1	intrauterine pregnancy		2019-04-29	40	vaginal	female	3.45
858	2018-08-03 09:10	0	29	GnRH-antagonist	19.05	primary	tubal	2	IVF	2.016	6.51	5.18	48.07	14.77	3	3322	4.44	0.692	10.4	9	2	2018-08-06	2	1	0	0			- -
859	2018-08-03 10:00	1-2	31	GnRH-antagonist	20.31	primary	male	6	ICSI	1.953	5.55	4.73	22	13.1	1	998	2.17	0.253	10.3	9	2	2018-08-06	2	2	0	0			- -
860	2018-08-03 10:30	0	42	GnRH-antagonist	23.03	secondary	male	2	IVF	1.646	7.75	7.28	56.75	15	2	2216	4.07	0.806	10.3	9	4	2018-08-06	2	2	0	0			- -
861	2018-08-05 09:45	0	25	GnRH-antagonist	19.76	secondary	tubal	5	IVF	1.71	8.27	5.38	37.84	11.99	2	2054	1.58	0.577	9.6	10	2	2018-08-08	2	2	0	1	ectopic pregnancy		- -
862	2018-08-05 10:20	0	35	GnRH-antagonist	19.33	primary	male	4	ICSI	8.183	8.1	3.46	24.18	9.73	1	1879	3.29	0.718	11.5	11	2	2018-08-08	2	2	0	0			- -
863	2018-08-07 08:50	0	35	GnRH-antagonist	20.96	secondary	Ovulatory	4	IVF	2.757	5.82	3.96	12.48	13.66	1	1814	2.88	0.511	11.5	6	5	2018-08-10	2	2	0	1	intrauterine pregnancy		2019-04-25	39	vaginal	male	4.9
864	2018-08-08 09:03	0	25	GnRH-antagonist	20.83	primary	Mixed	2	ICSI	7.918	5.29	6.1	53.94	11.42	2	2680	3.5	0.274	12.5	11	2	2018-08-11	2	2	0	1	intrauterine pregnancy		2019-03-26	34	Cesarean	male	2.55
865	2018-08-11 09:45	0	29	GnRH-antagonist	19.47	primary	male	1	ICSI	0.9	9.3	4.69	52.7	11.9	1	1213	3.22	0.427	9	7	4	2018-08-14	2	1	0	1	intrauterine pregnancy		2019-05-06	40	vaginal	male	3.1
866	2018-08-12 09:05	0	27	GnRH-antagonist	22.1	primary	male	3	IVF	1.303	2.75	3.15	21.9	14.53	1	1761	2.03	0.414	13	7	2	2018-08-15	2	1	0	0			- -
867	2018-08-12 09:25	0	24	GnRH-antagonist	18.49	primary	male	0	ICSI	9.118	6.93	6.5	31.94	7.05	2	2085	1.93	0.208	12.8	6	3	2018-08-15	1	1	0	0			- -
868	2018-08-12 09:46	0	28	GnRH-antagonist	18.43	primary	tubal	3	IVF	8.064	6.17	4.84	40.01	10.21	3	3009	2.51	0.926	9.6	8	2	2018-08-15	2	2	0	1	intrauterine pregnancy		2019-04-27	38	vaginal	female	2.95
869	2018-08-14 08:46	0	37	GnRH-antagonist	24.03	secondary	male	12	ICSI	1.21	6.35	4.49	21.38	12.37	1	487.1	1.89	0.45	12.1	4	2	2018-08-17	2	2	0	0			- -
870	2018-08-14 09:55	0	30	GnRH-antagonist	23.16	primary	Ovulatory	6	IVF	0.915	2.51	2.29	55	16.25	1	1669	1.26	0.389	9.1	7	2	2018-08-17	2	1	0	0			- -
871	2018-08-14 10:10	0	33	GnRH-antagonist	25.71	primary	tubal	5	IVF	NA	6.09	4.76	34.6	14.21	1	1955	5.07	0.501	11.4	7	2	2018-08-17	2	2	0	0			- -
872	2018-08-16 09:45	0	27	GnRH-antagonist	19.63	primary	tubal	2	IVF	6.31	5.82	8.36	73.8	13.11	2	2395	7.3	0.746	9	8	2	2018-08-19	2	2	0	1	intrauterine pregnancy		2019-05-10	40	Cesarean	female	3.35
873	2018-08-17 08:43	0	38	GnRH-antagonist	21.3	secondary	tubal	3	IVF	2.217	9.67	5.25	20.99	13.07	1	1104	2.27	0.413	9	10	7	2018-08-20	2	2	0	1	intrauterine pregnancy		2019-04-21	37	Cesarean	male	3	female	3
874	2018-08-17 09:50	0	30	GnRH-antagonist	21.26	secondary	tubal	1	IVF	1.944	5.58	5.95	34.14	9.27	1	1057	3.03	0.393	10.2	8	2	2018-08-20	1	1	0	0			- -
875	2018-08-18 09:06	0	26	GnRH-antagonist	16.65	primary	Endometriosis	2	IVF	4.435	6.04	3.12	38.88	15.38	2	2731	0.893	1.2	11	10	3	2018-08-21	1	1	0	0			- -
876	2018-08-18 09:20	0	26	GnRH-antagonist	17.36	primary	male	3	ICSI	1.647	8.44	6.84	37.33	12.11	2	2940	2.56	0.738	8.8	8	1	2018-08-21	1	1	0	0			- -
877	2018-08-18 09:50	0	29	GnRH-antagonist	23.38	primary	male	5	ICSI	6.59	6.71	7.86	34	9.25	2	2229	5.59	0.518	13.8	15	2	2018-08-21	2	2	0	1	intrauterine pregnancy		2019-04-29	38	vaginal	male	3.2
878	2018-08-18 10:20	≥3	36	GnRH-antagonist	18.49	secondary	tubal	5	ICSI	22	5.63	5.16	28.63	9.67	3	3248	2.63	0.881	7.2	12	3	2018-08-21	1	1	0	0			- -
879	2018-08-19 08:48	0	35	GnRH-antagonist	20.78	primary	tubal	3	IVF	0.837	7.6	5.01	26.13	13.23	1	279.3	2.23	0.105	11.3	1	1	2018-08-22	1	1	0	1	intrauterine pregnancy	yes	- -
880	2018-08-19 09:05	0	36	GnRH-antagonist	16.77	secondary	tubal	12	IVF	0.89	10.43	6.91	68.08	22.57	1	1037	3.25	0.311	8.9	5	4	2018-08-22	2	1	0	1	intrauterine pregnancy		2019-05-07	39	vaginal	male	3.25
881	2018-08-21 10:35	0	25	GnRH-antagonist	21.33	primary	tubal	4	IVF	2.162	7.24	8.98	25.4	17.9	2	2427	1.3	1.18	8.8	8	5	2018-08-24	2	1	0	1	intrauterine pregnancy		2019-04-06	34	Cesarean	male	3.6	female	3.8
882	2018-08-22 09:35	0	29	GnRH-antagonist	19.65	primary	male	4	ICSI	10.82	5.37	2.83	46.32	9.98	3	3010	3.87	0.654	9.3	19	2	2018-08-25	2	2	0	0			- -
883	2018-08-24 08:55	0	24	GnRH-antagonist	16.22	primary	male	2	ICSI	2.385	13.27	5.62	77.33	15.76	2	2563	11.6	0.917	11.6	9	2	2018-08-27	2	2	0	0			- -
884	2018-08-24 09:50	0	37	GnRH-antagonist	22.31	secondary	tubal	1	IVF	7.95	5.42	3.89	39.98	10.27	3	3344	2.78	0.353	14.7	12	2	2018-08-27	2	2	0	1	intrauterine pregnancy		2019-05-09	39	Cesarean	male	3.7
885	2018-08-25 08:30	0	40	GnRH-antagonist	19.98	secondary	male	2	IVF	0.948	5.48	3.28	52.38	23.94	1	773.6	9.22	0.643	10.3	2	1	2018-08-28	1	1	0	0			- -
886	2018-08-26 09:00	0	31	GnRH-antagonist	19.68	primary	male	3	ICSI	2.194	8.41	5.43	44.95	20.06	1	1266	1.97	0.39	12.5	6	2	2018-08-29	2	1	0	0			- -
887	2018-08-29 08:40	0	30	GnRH-antagonist	23.69	secondary	tubal	2	IVF	4.666	7.38	8.54	65.48	14.05	3	3020	2.4	0.68	9.2	11	7	2018-09-01	2	2	0	1	intrauterine pregnancy		2019-05-07	37	vaginal	female	2.8
888	2018-09-02 08:46	1-2	41	GnRH-antagonist	24.03	secondary	Mixed	6	ICSI	NA	7.4	3.67	37.94	15.45	1	1432	2.89	0.544	9	7	3	2018-09-05	2	2	0	0			- -
889	2018-09-02 09:05	0	28	GnRH-antagonist	25.22	primary	male	2	IVF	1.488	5.76	4.44	67.98	10.95	1	873.7	1.84	0.226	12	3	2	2018-09-05	2	1	0	1	intrauterine pregnancy		2019-05-07	37	Cesarean	male	2.95	male	2.75
890	2018-09-06 09:20	0	25	GnRH-antagonist	22.1	secondary	tubal	1	IVF	17.247	7.1	8.05	51.9	6.07	2	2823	4.92	0.382	8.7	9	2	2018-09-09	2	2	0	1	intrauterine pregnancy	yes	- -
891	2018-09-08 10:15	0	31	GnRH-antagonist	25	secondary	tubal	5	IVF	2.76	5.91	3.21	35	8.62	2	2252	2.83	0.599	9	16	2	2018-09-11	2	2	1	1	intrauterine pregnancy		2019-05-22	38	vaginal	male	3.4
892	2018-09-09 09:00	1-2	46	GnRH-antagonist	20.81	secondary	Unexplained	2	IVF	0.924	7.34	6.48	35	20.82	2	2381	10.03	0.674	9.6	7	2	2018-09-12	2	1	0	0			- -
893	2018-09-09 09:12	0	28	GnRH-antagonist	20.08	primary	Endometriosis	3	IVF	1.87	8.24	4.3	26.33	13.89	1	1331	1.82	0.836	10	4	2	2018-09-12	2	2	0	1	intrauterine pregnancy		2019-05-29	39	vaginal	female	3.2
894	2018-09-09 10:00	0	27	GnRH-antagonist	23.39	secondary	tubal	5	IVF	4.85	6.3	4.8	27.12	8.66	3	3746	2.4	0.878	16.2	19	1	2018-09-12	1	1	0	0			- -
895	2018-09-10 09:36	0	41	GnRH-antagonist	23.53	secondary	tubal	4	IVF	0.98	7.55	3.39	35.65	9.47	1	1221	2.9	0.297	9	6	3	2018-09-13	2	2	0	0			- -
896	2018-09-16 09:16	0	39	GnRH-antagonist	22.31	secondary	male	1	IVF	0.531	12.05	3.87	64.27	17.07	1	1228	2.76	0.573	9.8	5	4	2018-09-19	2	2	0	0			- -
897	2018-09-18 08:50	1-2	41	GnRH-antagonist	17.97	secondary	tubal	10	IVF	1.13	9.5	5.1	52.72	14.98	1	1243	4.18	0.269	13.3	4	2	2018-09-21	2	1	0	0			- -
898	2018-09-19 08:45	1-2	36	GnRH-antagonist	25.39	secondary	tubal	2	IVF	0.69	4.21	8.54	65.12	13.48	1	648.4	2.21	0.125	11	4	2	2018-09-22	2	2	0	1	intrauterine pregnancy	yes	- -
899	2018-09-21 09:55	0	36	GnRH-antagonist	23.59	primary	tubal	3	IVF	0.66	8.89	4.31	35.59	16.16	1	1333	6.24	0.459	13.3	8	4	2018-09-24	2	2	0	0			- -
900	2018-09-21 10:55	0	33	GnRH-antagonist	24.77	secondary	tubal	2	IVF	0.492	8.1	3.3	27.1	12.18	1	1000	4.39	0.269	7.9	6	2	2018-09-24	2	2	0	0			- -
901	2018-09-22 09:00	0	28	GnRH-antagonist	23.8	primary	tubal	3	IVF	0.937	8.15	4.16	52.67	10.85	2	2221	8.36	0.549	7.8	6	4	2018-09-25	2	2	0	1	intrauterine pregnancy		2019-05-23	36	Cesarean	male	2.8	female	2.6
902	2018-09-23 08:46	≥3	43	GnRH-antagonist	20.7	secondary	tubal	1	IVF	NA	11.57	7.62	65.92	14.01	1	1365	5.92	0.469	12.4	2	2	2018-09-26	2	2	0	1	intrauterine pregnancy		2019-06-04	38	vaginal	male	3.55
903	2018-09-23 09:02	0	23	GnRH-antagonist	24.65	secondary	male	1	ICSI	3.49	9.06	6.26	37.49	10.63	1	1486	1.87	0.361	11.7	13	2	2018-09-26	2	2	1	0			- -
904	2018-09-27 09:10	1-2	40	GnRH-antagonist	21.5	secondary	tubal	2	IVF	NA	7.21	6.12	40.34	12.2	1	949.3	1.14	0.131	12.9	7	3	2018-09-30	2	2	0	1	intrauterine pregnancy	yes	- -
905	2018-09-29 09:35	0	22	GnRH-antagonist	27.12	primary	tubal	3	IVF	3.45	5.06	3.63	30	10.09	1	1892	2.4	0.649	10.8	12	2	2018-10-02	2	2	0	0			- -
906	2018-09-30 08:30	0	37	GnRH-antagonist	21.63	secondary	male	2	ICSI	1.528	9.8	4.78	38.42	18.29	1	1479	3.06	0.537	12	7	4	2018-10-03	2	1	0	1	intrauterine pregnancy		2019-06-05	39	vaginal	female	3.75
907	2018-10-04 08:42	1-2	45	GnRH-antagonist	20.31	secondary	tubal	4	IVF	1.35	5.42	8.32	84	15.14	1	1494	6.89	0.23	10.6	4	2	2018-10-07	2	2	0	0			- -
908	2018-10-05 09:00	0	40	GnRH-antagonist	24.02	secondary	tubal	1	IVF	0.588	10.38	4.46	56.82	10.05	1	518.9	4.37	0.204	10.8	3	2	2018-10-08	2	1	0	0			- -
909	2018-10-06 10:35	1-2	25	GnRH-antagonist	22.41	primary	Ovulatory	3	IVF	18	4.11	4.95	44.4	5.25	2	2343	3.11	0.178	13.8	7	3	2018-10-09	2	2	1	1	intrauterine pregnancy		2019-06-19	38	vaginal	female	2.4
910	2018-10-11 09:20	0	34	GnRH-antagonist	21.22	primary	male	4	IVF	0.581	9.21	4.92	27.07	12.83	1	1078	2.39	0.434	11	9	5	2018-10-14	2	1	0	0			- -
911	2018-10-15 08:56	1-2	34	GnRH-antagonist	18.75	secondary	tubal	6	IVF	3.649	7.42	6.9	29.91	10.23	2	2623	3.39	0.277	10.8	9	2	2018-10-18	2	2	0	1	intrauterine pregnancy	yes	- -
912	2018-10-15 09:46	0	36	GnRH-antagonist	18.9	secondary	tubal	2	IVF	6.243	6.6	7.76	76.03	11.76	3	3422	5.5	0.555	8.1	13	1	2018-10-18	1	1	0	1	intrauterine pregnancy	yes	- -
913	2018-10-15 09:58	0	25	GnRH-antagonist	22.03	secondary	tubal	0	IVF	4.953	6.14	5.38	25.53	9.8	2	2002	3.41	0.434	8.2	14	2	2018-10-18	2	2	0	1	intrauterine pregnancy		2019-06-30	37	vaginal	female	2.6
914	2018-10-16 09:15	1-2	37	GnRH-antagonist	19.95	secondary	tubal	1	IVF	NA	7.88	4.46	23.82	14.5	1	796.8	2.19	0.453	9.6	4	2	2018-10-19	2	1	0	0			- -
915	2018-10-18 08:46	1-2	33	GnRH-antagonist	24.65	secondary	Mixed	1	IVF	1.101	7.04	2.68	26.97	8.97	1	1223	5.91	0.157	9.6	2	1	2018-10-21	1	1	0	0			- -
916	2018-10-18 08:55	1-2	32	GnRH-antagonist	21.78	secondary	Endometriosis	2	IVF	0.661	6.17	3.59	58.3	19.4	1	1513	4.1	0.831	7.4	4	2	2018-10-21	2	1	0	0			- -
917	2018-10-19 08:40	0	27	GnRH-antagonist	21.08	secondary	tubal	1	IVF	6.48	5.77	9.33	26.67	11.76	3	3105	1.94	0.638	13	8	2	2018-10-22	2	2	0	1	intrauterine pregnancy		2019-07-07	39	vaginal	female	3.35
918	2018-10-23 09:05	0	27	GnRH-antagonist	18.73	primary	tubal	5	IVF	10.995	5.17	8.02	32.96	6.65	2	2508	4.48	0.487	12.9	10	2	2018-10-26	2	1	0	1	intrauterine pregnancy		2019-07-01	37	vaginal	female	2.25
919	2018-10-23 09:30	1-2	28	GnRH-antagonist	23.63	primary	tubal	7	IVF	0.77	12.4	3.8	21.6	18.12	1	1532	2.58	0.01	12.9	7	2	2018-10-26	2	2	0	1	intrauterine pregnancy		2019-06-19	36	Cesarean	male	2.1	female	2.75
920	2018-10-24 08:58	1-2	29	GnRH-antagonist	20.83	secondary	tubal	3	IVF	0.798	7.76	4.17	28.99	26.9	1	1359	1.8	0.933	9.4	7	2	2018-10-27	2	1	0	0			- -
921	2018-10-28 09:10	0	34	GnRH-antagonist	22.58	primary	Unexplained	6	IVF	6.56	5.86	6.67	39.01	7.19	2	2553	3.11	0.487	11.3	11	2	2018-10-31	2	2	0	1	intrauterine pregnancy		2019-07-10	38	vaginal	female	2.96
922	2018-10-29 09:02	0	35	GnRH-antagonist	18.73	secondary	Unexplained	3	IVF	0.847	6.59	3.33	37.53	28.6	1	1197	0.99	0.953	8.3	8	2	2018-11-01	2	1	0	0			- -
923	2018-11-01 08:55	0	28	GnRH-antagonist	26.67	primary	male	5	ICSI	7.8	7.62	7.19	34.74	8.44	1	513.5	2.27	0.09	13.4	3	2	2018-11-04	2	2	0	0			- -
924	2018-11-01 09:50	0	29	GnRH-antagonist	19.53	primary	tubal	3	IVF	6.147	6.16	7.73	44.85	7.28	1	1229	2.47	0.235	9.6	4	3	2018-11-04	2	1	0	1	intrauterine pregnancy		2019-07-22	39	Cesarean	female	3.15
925	2018-11-05 08:46	0	39	GnRH-antagonist	20.57	secondary	tubal	7	IVF	1.23	8.19	2.32	25	12.42	1	980.5	4.96	0.237	8	2	1	2018-11-08	1	1	0	0			- -
926	2018-11-06 09:20	0	43	GnRH-antagonist	20.89	secondary	tubal	2	IVF	0.973	7.42	3.95	47.82	20.59	1	1436	5.58	1.03	10	5	2	2018-11-09	1	1	0	0			- -
927	2018-11-08 09:00	1-2	30	GnRH-antagonist	20.7	primary	tubal	8	IVF	15.211	8.35	7.67	33.75	10.09	1	1602	1.86	0.119	11.4	6	2	2018-11-11	2	2	0	1	intrauterine pregnancy		2019-07-30	39	Cesarean	male	3.75
928	2018-11-09 09:00	0	27	GnRH-antagonist	21.08	primary	tubal	2	IVF	1.978	9.12	7.98	20.61	19	2	2375	2.28	0.818	10.5	5	4	2018-11-12	2	2	0	0			- -
929	2018-11-10 08:35	1-2	32	GnRH-antagonist	25.08	secondary	male	3	ICSI	1.34	8.28	9.87	45.22	9.18	1	877.4	4.59	0.211	10.5	4	4	2018-11-13	2	2	0	1	intrauterine pregnancy		2019-07-26	38	vaginal	female	2.9
930	2018-11-11 09:00	0	30	GnRH-antagonist	21.48	primary	Unexplained	4	IVF	1.131	9	3.34	45.97	11.31	1	1555	5.43	0.376	13.4	6	3	2018-11-14	2	1	0	1	intrauterine pregnancy		2019-07-24	38	vaginal	male	3.5
931	2018-11-13 09:40	0	28	GnRH-antagonist	19.49	secondary	tubal	0	IVF	11.582	5.77	13.04	44.85	14.2	3	3856	8.3	1.17	9.5	11	2	2018-11-16	2	1	0	1	intrauterine pregnancy		2019-08-08	40	Cesarean	male	NA	male	NA
932	2018-11-15 09:55	0	32	GnRH-antagonist	24.39	primary	Ovulatory	4	IVF	8.816	4.22	9.84	26.22	5.95	1	1647	5.73	0.235	11.6	10	2	2018-11-18	2	2	0	1	intrauterine pregnancy		2019-07-26	38	vaginal	female	3
933	2018-11-18 08:35	≥3	46	GnRH-antagonist	20	secondary	male	2	ICSI	NA	9.65	5.58	53.09	13.26	1	938.3	2.18	0.177	8.2	4	3	2018-11-21	2	1	0	0			- -
934	2018-11-21 08:45	0	41	GnRH-antagonist	22.89	secondary	Unexplained	2	IVF	0.801	6.31	4.56	64.08	18.04	2	2428	5.66	0.648	10	9	8	2018-11-24	2	2	0	1	intrauterine pregnancy		2019-08-24	41	Cesarean	male	3
935	2018-11-23 09:40	0	35	GnRH-antagonist	20.31	primary	male	3	IVF	3.243	6.71	5.16	19.77	10.48	1	1201	1.32	0.426	12.9	9	2	2018-11-26	2	2	0	0			- -
936	2018-11-25 08:36	0	35	GnRH-antagonist	19.83	secondary	tubal	2	IVF	0.921	10.28	3.15	69.97	13.43	1	1441	2.39	0.427	9.5	8	4	2018-11-28	2	2	0	0			- -
937	2018-11-25 08:56	0	28	GnRH-antagonist	20.7	secondary	tubal	1	IVF	4.06	8.16	3.31	33.37	9.03	1	1470	1.81	0.297	8.5	3	1	2018-11-28	1	1	0	1	intrauterine pregnancy		2019-08-05	38	Cesarean	male	2.7
938	2018-11-27 09:10	0	27	GnRH-antagonist	24.65	secondary	tubal	1	IVF	5.22	4.84	5.12	35.43	6.93	2	2805	2.06	0.225	8.2	16	2	2018-11-30	2	2	0	1	intrauterine pregnancy		2019-08-15	39	vaginal	male	3.2
939	2018-11-28 09:05	0	25	GnRH-antagonist	21.51	secondary	Unexplained	2	IVF	7.249	8.38	9.8	43.4	9.01	1	840.6	3.97	0.123	7.4	2	2	2018-12-01	2	1	0	0			- -
940	2018-11-30 08:40	0	42	GnRH-antagonist	24.44	secondary	tubal	2	IVF	2.161	6.03	3.81	24.79	16.37	1	927.2	6.7	0.371	10.8	2	1	2018-12-03	1	1	0	0			- -
941	2018-12-01 08:26	0	25	GnRH-antagonist	19.56	primary	tubal	4	IVF	3.319	5.12	4.67	58.95	15.53	1	1026	4.49	0.454	14	1	1	2018-12-04	1	1	0	1	intrauterine pregnancy		2019-08-05	36	Cesarean	male	2.7
942	2018-12-02 08:50	0	28	GnRH-antagonist	20.32	primary	Unexplained	1	IVF	1.441	5.88	3.6	48.89	15.06	1	724.3	2.24	0.159	8.4	5	2	2018-12-05	2	1	0	1	intrauterine pregnancy		2019-08-21	39	Cesarean	female	3.55
943	2018-12-02 09:00	0	32	GnRH-antagonist	22.66	primary	tubal	0	IVF	2.54	6.84	2.68	22	17.9	1	739.4	1.48	0.219	11.2	8	2	2018-12-05	2	2	0	1	intrauterine pregnancy		2019-08-06	37	Cesarean	male	2.2	male	2.5
944	2018-12-04 09:10	0	35	GnRH-antagonist	20.81	secondary	male	0	ICSI	4	3.32	7.17	44.14	13.99	3	3403	2.04	0.746	12.2	9	2	2018-12-07	2	2	0	1	intrauterine pregnancy		2019-08-23	39	vaginal	female	2.55
945	2018-12-06 09:15	0	31	GnRH-antagonist	26.04	primary	male	4	ICSI	10.98	6.1	5.71	46.26	10.07	1	1546	2.17	0.05	9.8	11	3	2018-12-09	2	1	0	1	intrauterine pregnancy		2019-08-28	40	vaginal	female	3.3
946	2018-12-08 09:02	1-2	40	GnRH-antagonist	19.48	secondary	male	4	IVF	1.293	6.69	2.84	61.84	21.22	1	1850	2.12	0.415	10.7	9	2	2018-12-11	2	1	0	1	intrauterine pregnancy		2019-08-06	36	Cesarean	female	2.62
947	2018-12-11 09:10	1-2	42	GnRH-antagonist	19.91	secondary	Ovulatory	3	IVF	0.728	9.61	4.91	73.16	19.37	1	1312	2.37	0.071	6.1	5	2	2018-12-14	2	1	0	0			- -
948	2018-12-11 10:25	0	28	GnRH-antagonist	20.94	secondary	Mixed	1	IVF	2.229	5.67	4.29	36.15	10.38	1	1631	2.86	0.534	10.3	15	2	2018-12-14	2	2	0	1	intrauterine pregnancy		2019-08-01	34	Cesarean	male	2.3	male	2.2
949	2018-12-12 09:50	0	29	GnRH-antagonist	18.66	primary	Mixed	3	IVF	2.456	7.65	8.38	43.88	17.44	2	2269	1.5	0.699	15.4	13	2	2018-12-15	2	2	0	1	intrauterine pregnancy		2019-09-02	39	Cesarean	female	2.8
950	2018-12-15 09:00	1-2	37	GnRH-antagonist	20.93	secondary	male	7	IVF	10.301	5.9	6.36	30.4	10.67	1	1202	2.1	0.103	9	4	3	2018-12-18	2	1	0	0			- -
951	2018-12-16 08:45	0	37	GnRH-antagonist	24.12	secondary	male	4	IVF	1.279	9.68	3.52	49.37	13.18	1	1155	1.35	0.385	9.8	4	3	2018-12-19	2	2	0	0			- -
952	2018-12-21 09:00	0	31	GnRH-antagonist	20.55	primary	tubal	2	IVF	1.014	7.47	3.19	42.77	15.75	1	1272	2.51	0.478	12.4	4	4	2018-12-24	2	1	0	1	intrauterine pregnancy		2019-08-31	38	vaginal	male	3.2
953	2018-12-21 09:20	0	31	GnRH-antagonist	24.97	primary	Unexplained	2	IVF	3.718	5.44	2	20.89	8.54	1	1195	3.61	0.151	11.9	9	2	2018-12-24	2	2	0	0			- -
954	2018-12-23 09:15	0	41	GnRH-antagonist	23.44	secondary	male	2	IVF	2.001	8.33	6.49	65.95	20.86	1	1597	4.73	0.48	11.4	6	5	2018-12-26	2	2	0	1	intrauterine pregnancy	yes	- -
955	2018-12-23 09:25	0	47	GnRH-antagonist	23.44	secondary	tubal	1	IVF	3.062	7.85	7.09	69.36	19.2	2	2081	6.09	0.331	11.6	9	3	2018-12-26	2	2	0	0			- -
956	2018-12-24 08:46	0	36	GnRH-antagonist	21.78	secondary	tubal	6	IVF	5.589	8.93	7.6	45.54	20.17	3	3700	2.98	0.795	7.6	11	2	2019-05-25	2	2	0	1	intrauterine pregnancy		2020-01-10	35	Cesarean	male	2.3	male	2.28
957	2018-12-25 08:46	0	31	GnRH-antagonist	18.36	secondary	tubal	3	IVF	5.359	7.17	5.28	22.48	10.65	1	737	3.63	0.343	10.4	4	3	2018-12-28	1	1	0	0			- -
958	2018-12-25 08:52	0	37	GnRH-antagonist	19.56	secondary	tubal	9	IVF	0.888	10.44	4.73	55.45	17.53	1	815	8.54	0.34	8	3	2	2018-12-28	1	1	0	0			- -
959	2018-12-26 10:10	≥3	38	GnRH-antagonist	20.03	primary	Unexplained	4	IVF	2.818	8.96	4.97	35.02	14.89	2	2230	3.19	0.389	10.3	7	1	2018-12-29	1	1	0	1	intrauterine pregnancy		2019-09-17	40	vaginal	female	3
960	2018-12-28 09:20	1-2	37	GnRH-antagonist	25.08	secondary	tubal	2	IVF	NA	6.49	3.92	29.94	10.53	1	1468	2.77	0.315	14.7	10	2	2018-12-31	2	2	0	0			- -
961	2018-12-28 10:15	0	23	GnRH-antagonist	16.82	primary	male	0	ICSI	8.08	7.31	7.55	55.4	8.9	3	3192	3.42	0.735	9	13	2	2018-12-31	2	2	0	1	intrauterine pregnancy		2019-09-13	38	Cesarean	female	3.05
962	2018-12-29 10:09	0	42	GnRH-antagonist	24.77	secondary	Ovulatory	1	IVF	1.65	10.49	5.87	34.87	14.3	3	3824	5.46	0.468	9.9	9	2	2019-01-01	2	2	0	0			- -
963	2019-01-02 09:40	0	42	GnRH-antagonist	25.56	secondary	male	12	ICSI	NA	5.95	2.46	28.34	22.04	1	1597	2.79	0.91	11.8	13	2	2019-01-05	2	1	0	0			- -
964	2019-01-05 09:00	0	29	GnRH-antagonist	23.05	secondary	tubal	3	IVF	2.21	4	1.58	17.08	10.87	1	1354	5.47	0.594	10.4	7	4	2019-01-08	2	2	0	0			- -
965	2019-01-06 09:26	0	33	GnRH-antagonist	22.63	secondary	tubal	2	IVF	1.41	9.82	6.85	32.67	17.05	1	1718	4.49	0.534	7.9	7	2	2019-01-09	2	1	0	1	intrauterine pregnancy		2019-09-25	39	Cesarean	male	2.6	female	2.1
966	2019-01-07 08:56	0	36	GnRH-antagonist	22.55	secondary	tubal	10	IVF	9.767	6.96	7.44	71.53	11.84	1	1369	5.81	0.129	13.9	3	2	2019-01-10	2	2	0	1	intrauterine pregnancy		2019-09-05	36	Cesarean	male	2.4
967	2019-01-12 10:10	0	28	GnRH-antagonist	16.94	secondary	male	1	IVF	4.906	11.28	7.97	39.6	14.14	1	1701	1.19	0.283	10	10	1	2019-01-15	1	1	0	0			- -
968	2019-01-14 09:16	0	35	GnRH-antagonist	21.88	secondary	Ovulatory	6	IVF	1.752	9.81	4.35	50.68	17.94	1	1826	2.32	0.9	8.3	7	2	2019-01-17	2	2	0	0			- -
969	2019-01-20 09:10	0	40	GnRH-antagonist	22.89	secondary	tubal	9	IVF	2.562	6.74	4.89	21.96	13.47	1	1828	4.03	0.251	14.5	6	4	2019-01-23	2	2	0	0			- -
970	2019-01-21 08:56	≥3	42	GnRH-antagonist	22.31	secondary	Endometriosis	0	IVF	0.72	15.26	5.41	16.47	24	1	808	5	0.08	11	1	1	2019-01-24	1	1	0	0			- -
971	2019-01-21 09:06	1-2	25	GnRH-antagonist	16.3	primary	tubal	4	IVF	3.509	9.11	5.57	71.47	16.54	2	2573	7.84	0.552	12.1	9	3	2019-01-24	2	1	0	0			- -
972	2019-01-21 10:10	0	29	GnRH-antagonist	17.58	secondary	tubal	1	IVF	4.05	9.52	12.86	65.23	8.79	3	3560	6.11	0.2	10.2	6	2	2019-01-24	2	2	0	1	intrauterine pregnancy		2019-10-20	41	vaginal	female	3.58
973	2019-01-23 09:05	0	30	GnRH-antagonist	20.96	primary	Unexplained	7	IVF	1.6	5.04	6.35	42.23	12.59	1	1379	3.46	0.451	12.8	7	1	2019-01-26	1	1	0	1	ectopic pregnancy		- -
974	2019-01-23 09:10	0	30	GnRH-antagonist	20.03	secondary	tubal	1	IVF	3.233	5.74	4.07	25.83	14.02	1	1243	2.42	0.219	12.2	4	3	2019-01-26	2	2	0	1	intrauterine pregnancy		2019-10-10	38	vaginal	male	2.75
975	2019-01-24 09:10	0	20	GnRH-antagonist	21.88	primary	male	2	ICSI	6.858	6.1	3.48	25.78	8.3	1	2000	11.26	0.279	10	7	2	2019-01-27	2	1	0	1	intrauterine pregnancy	yes	- -
976	2019-01-26 08:30	0	37	GnRH-antagonist	23.14	secondary	male	6	ICSI	1.959	4.88	5.15	34.57	12.97	1	1867	3.9	0.332	11	8	2	2019-01-29	1	1	0	1	intrauterine pregnancy		2019-10-05	37	Cesarean	male	2.9
977	2019-02-21 08:40	0	26	GnRH-antagonist	19.92	primary	male	0	ICSI	6.029	4.66	2.24	34.15	14.96	1	882.9	1.45	0.319	10.4	8	2	2019-02-24	2	2	0	1	intrauterine pregnancy		2019-11-03	38	Cesarean	male	2.8
978	2019-02-22 08:50	0	27	GnRH-antagonist	23.44	primary	male	9	ICSI	2.061	4.35	4.1	73.17	12.73	1	937.8	3.45	0.347	9.6	8	1	2019-02-25	1	1	0	1	intrauterine pregnancy		2019-11-15	39	Cesarean	female	3.2
979	2019-02-24 08:46	0	33	GnRH-antagonist	27.77	secondary	tubal	10	IVF	2.498	5.04	3.65	24.38	9.7	1	749.5	3.89	0.233	8.1	9	4	2019-02-27	2	1	0	0			- -
980	2019-02-24 08:46	0	27	GnRH-antagonist	19.22	primary	tubal	3	IVF	1.4	10.6	7	20	24.68	1	482.5	4.64	0.495	10.8	1	1	2019-02-27	1	1	0	1	intrauterine pregnancy		2019-11-08	39	vaginal	male	3.3
981	2019-02-24 08:56	0	42	GnRH-antagonist	18.49	secondary	tubal	1	IVF	1.557	7.08	4.14	41.95	25.99	1	1729	4.6	0.795	8.9	6	2	2019-02-27	2	2	0	0			- -
982	2019-02-25 09:33	0	35	GnRH-antagonist	23.71	secondary	tubal	9	IVF	4.176	6.52	5.11	38.14	8.43	1	1556	5.33	0.317	13.3	9	2	2019-02-28	2	2	0	1	intrauterine pregnancy	yes	- -
983	2019-02-26 09:10	1-2	32	GnRH-antagonist	19.53	primary	tubal	3	IVF	1.682	6.63	5.78	22.51	11.4	1	1392	5.17	0.403	14.4	7	2	2019-03-01	2	1	0	1	intrauterine pregnancy		2019-11-23	40	Cesarean	female	3.55
984	2019-02-27 08:50	1-2	40	GnRH-antagonist	22.83	secondary	tubal	1	IVF	0.674	15.54	6.43	25.47	17.19	1	816.4	9.93	0.37	7.8	3	3	2019-03-02	1	1	0	0			- -
985	2019-02-28 08:55	0	41	GnRH-antagonist	27.69	primary	Unexplained	1	IVF	2.843	5.97	4.32	70.02	17.47	1	1615	5.64	0.586	10.6	3	2	2019-03-03	2	1	0	1	intrauterine pregnancy	yes	- -
986	2019-02-28 09:58	1-2	25	GnRH-antagonist	21.48	primary	male	3	ICSI	1.02	13.93	6.41	70.77	12.29	1	1016	2.84	0.356	11	5	5	2019-03-03	2	1	0	0			- -
987	2019-03-01 09:15	0	32	GnRH-antagonist	18.67	primary	Mixed	2	IVF	5.791	6.48	6.54	38.98	13.46	2	2844	2.32	0.621	13.6	12	2	2019-03-04	2	2	0	0			- -
988	2019-03-01 09:50	1-2	32	GnRH-antagonist	21.78	primary	tubal	7	IVF	2.725	7.15	6.43	13.58	14.05	1	1758	2.23	0.435	14.5	9	1	2019-03-04	1	1	0	0			- -
989	2019-03-01 10:05	0	40	GnRH-antagonist	22.03	secondary	tubal	2	IVF	2.57	5.93	5.67	26.2	11.86	2	2432	1.83	1.07	9.2	12	2	2019-03-04	2	2	0	0			- -
990	2019-03-02 08:36	0	33	GnRH-antagonist	28.89	primary	Ovulatory	8	IVF	0.361	2.13	5.59	27.9	16.62	1	307.2	2.46	0.05	8.4	1	1	2019-03-05	1	1	0	1	intrauterine pregnancy		2019-11-18	39	Cesarean	female	3.55
991	2019-03-02 08:46	0	27	GnRH-antagonist	20.94	secondary	tubal	5	IVF	5.7	7.41	6.15	45.06	10.98	1	1567	3	0.359	14.1	9	2	2019-03-05	2	2	0	1	intrauterine pregnancy		2019-11-02	37	Cesarean	male	2.8	male	2.4
992	2019-03-02 09:06	0	22	GnRH-antagonist	20.96	primary	male	1	ICSI	4.173	5.98	5.03	22.42	7.92	1	1835	0.969	0.311	10	12	2	2019-03-05	2	2	0	0			- -
993	2019-03-03 09:03	1-2	28	GnRH-antagonist	18.73	primary	Ovulatory	2	IVF	0.758	12.51	5.54	55.21	18.4	1	822.1	8.99	0.293	9.2	5	2	2019-03-06	2	1	0	0			- -
994	2019-03-03 09:13	1-2	35	GnRH-antagonist	20.83	secondary	tubal	7	IVF	2.904	4.35	5.59	24.89	16	1	1774	2.95	0.505	14.1	7	2	2019-03-06	2	2	0	0			- -
995	2019-03-03 09:35	0	33	GnRH-antagonist	21.48	secondary	tubal	1	IVF	2.338	5.27	1.16	27.79	13.96	1	1803	3.88	0.466	10.7	4	2	2019-03-06	2	2	0	1	intrauterine pregnancy		2019-11-11	38	Cesarean	male	2.85	female	2.65
996	2019-03-07 09:10	0	31	GnRH-antagonist	19.53	secondary	tubal	1	IVF	4.999	7.09	3.95	43.26	17.43	1	1448	2.13	0.439	10	8	2	2019-03-10	2	2	0	1	intrauterine pregnancy		2019-11-07	36	vaginal	male	2.95
997	2019-03-07 09:10	0	25	GnRH-antagonist	24.61	primary	Ovulatory	4	IVF	13.724	3.35	9.2	18.07	8.96	1	1409	11.12	0.516	9.5	8	2	2019-03-10	2	2	1	1	intrauterine pregnancy		2019-08-27	26	vaginal	male	0.7
998	2019-03-11 09:45	0	29	GnRH-antagonist	20.28	primary	tubal	2	IVF	7.027	8.33	7.71	37.4	13.1	4	4298	4.98	0.936	9.6	3	3	2019-03-14	2	1	0	0			- -
999	2019-03-13 09:00	≥3	35	GnRH-antagonist	25.89	secondary	tubal	1	IVF	0.59	9.43	3.6	21.07	7.83	1	571.9	1.51	0.135	7.2	3	2	2019-03-16	2	1	0	0			- -
1000	2019-03-13 10:00	0	41	GnRH-antagonist	20.43	primary	male	16	IVF	2.578	9.21	5.22	68.4	17.65	1	1255	2.38	0.345	12.2	7	2	2019-03-16	2	2	0	0			- -
1001	2019-03-13 10:10	0	36	GnRH-antagonist	19.14	secondary	tubal	6	IVF	1.365	6.44	2.74	56.99	23.28	1	626.6	0.977	0.298	10.8	4	2	2019-03-16	2	2	0	0			- -
1002	2019-03-15 09:05	0	28	GnRH-antagonist	18.59	primary	tubal	2	IVF	3.954	5.7	5.07	30.8	10.74	1	1660	0.956	0.406	8.9	12	2	2019-03-18	2	2	0	0			- -
1003	2019-03-19 09:25	0	26	GnRH-antagonist	25.71	primary	Ovulatory	0	IVF	11.382	2.94	0.5	29.31	8.66	2	2861	11.93	0.23	10	8	2	2019-03-22	2	1	1	1	intrauterine pregnancy		2019-11-23	37	vaginal	male	2.8
1004	2019-03-19 09:40	0	34	GnRH-antagonist	29.97	primary	male	5	ICSI	2.188	5.23	3.61	26.91	11.09	1	1280	2.23	0.294	12.4	7	2	2019-03-22	2	2	0	1	intrauterine pregnancy		2019-11-22	37	Cesarean	male	2.51	female	2.5
1005	2019-03-20 08:55	0	27	GnRH-antagonist	20.45	primary	Ovulatory	3	IVF	6.578	7.59	10.04	46.76	8.16	1	1603	6.68	0.139	8	4	2	2019-03-23	2	1	0	1	intrauterine pregnancy		2019-11-18	36	Cesarean	male	2.6	female	2.45
1006	2019-03-22 09:45	0	29	GnRH-antagonist	19.72	primary	male	4	IVF	5.96	7.01	5.9	29.4	15.6	2	2744	3.5	0.745	11.1	19	2	2019-03-25	2	2	0	0			- -
1007	2019-03-26 08:45	1-2	40	GnRH-antagonist	22.94	secondary	tubal	5	IVF	1.53	9.45	2.82	10.58	11.26	1	341	5.73	0.067	8.9	2	2	2019-03-29	2	2	0	0			- -
1008	2019-03-26 09:50	1-2	25	GnRH-antagonist	21.78	primary	tubal	5	ICSI	3.455	6.74	5.73	33.92	18.74	3	3620	1.66	1.57	7.5	19	2	2019-03-29	2	1	0	1	intrauterine pregnancy		2019-11-30	37	Cesarean	male	2.45	male	2.1
1009	2019-03-26 09:53	0	42	GnRH-antagonist	28.04	secondary	male	3	ICSI	8.335	5.65	4.68	39.99	10.06	3	3815	4.38	0.768	12	11	3	2019-03-29	2	1	0	0			- -
1010	2019-03-29 09:50	≥3	35	GnRH-antagonist	24	primary	tubal	3	IVF	0.786	NA	3.9	21.91	17.88	1	1652	1.63	0.645	9.2	14	3	2019-04-01	2	1	0	0			- -
1011	2019-03-30 08:55	0	24	GnRH-antagonist	23.44	primary	tubal	2	IVF	0.851	7.83	6.56	57.57	14.3	1	1070	6.9	0.666	11	5	3	2019-04-02	2	1	0	1	intrauterine pregnancy		2019-11-10	34	Cesarean	male	2.4	female	2.2
1012	2019-04-01 08:36	1-2	33	GnRH-antagonist	21.34	primary	male	5	IVF	1.274	8.8	4.39	10.73	15.19	1	1004	3.23	0.246	8.4	6	2	2019-04-04	2	1	0	1	intrauterine pregnancy		2019-12-13	38	Cesarean	male	2.9
1013	2019-04-01 09:16	0	33	GnRH-antagonist	19.43	secondary	tubal	4	IVF	1.28	6.25	4.28	33.88	24.64	1	1461	2.77	0.482	10.9	4	3	2019-04-04	1	1	0	0			- -
1014	2019-04-01 09:46	0	28	GnRH-antagonist	20.28	primary	tubal	4	IVF	1.882	8.96	6.02	46.34	13.31	1	962.7	3.19	0.477	5.9	5	5	2019-04-04	2	2	0	0			- -
1015	2019-04-04 08:40	0	32	GnRH-antagonist	25.97	primary	male	5	ICSI	1.078	6.42	3.58	57.46	15.64	1	712.9	4.59	0.137	11	3	2	2019-04-07	1	1	0	1	intrauterine pregnancy		2019-12-13	38	vaginal	female	3.09
1016	2019-04-04 09:25	1-2	28	GnRH-antagonist	17.36	primary	male	4	ICSI	2.103	12.72	7.19	41.17	21.09	1	1113	0.988	0.464	9.1	7	3	2019-04-07	2	2	0	0			- -
1017	2019-04-05 09:15	0	34	GnRH-antagonist	19.13	secondary	tubal	4	IVF	NA	6.39	5.36	35.68	15.3	1	1646	3.17	0.479	9.8	6	2	2019-04-08	2	1	0	1	intrauterine pregnancy		2019-12-20	38	vaginal	male	3.45
1018	2019-04-08 08:46	0	29	GnRH-antagonist	22.77	secondary	tubal	1	IVF	4.617	5.41	5.57	43.82	12.31	1	1718	7.05	0.579	10.3	5	2	2019-04-11	2	2	0	1	intrauterine pregnancy		2019-12-12	37	vaginal	male	2.7
1019	2019-04-09 08:55	0	33	GnRH-antagonist	22.03	secondary	Ovulatory	1	IVF	0.61	7.66	4.22	35.8	9.43	1	941	2.73	0.238	9	6	2	2019-04-12	2	2	0	0			- -
1020	2019-04-09 09:55	0	35	GnRH-antagonist	18.31	secondary	tubal	4	IVF	1.19	12.75	6.08	29.26	26.91	1	1093	4.27	0.718	9.6	2	2	2019-04-12	2	2	0	0			- -
1021	2019-04-10 09:30	0	36	GnRH-antagonist	20.7	primary	Unexplained	6	IVF	7.226	8.14	3.96	30.91	10.99	1	1175	2.73	0.691	9.1	6	2	2019-04-13	2	1	0	1	intrauterine pregnancy		2019-12-30	39	Cesarean	male	4
1022	2019-04-12 08:35	0	32	GnRH-antagonist	19.98	secondary	tubal	6	IVF	5.02	4.54	6.31	34.01	30.43	1	1770	2.01	0.879	8.8	10	2	2019-04-15	2	1	0	0			- -
1023	2019-04-12 10:20	0	32	GnRH-antagonist	22.83	secondary	tubal	1	IVF	5.116	5.6	4.54	13.94	12.79	1	1901	2.2	0.791	14	9	1	2019-04-15	1	1	0	0			- -
1024	2019-04-15 08:26	0	32	GnRH-antagonist	31.64	secondary	tubal	1	IVF	4.701	5.59	1.86	20.91	17.34	1	1792	6.73	0.704	8.7	4	3	2019-04-18	2	2	0	1	intrauterine pregnancy		2019-12-23	38	Cesarean	male	2.55	female	2.6
1025	2019-04-16 09:00	0	30	GnRH-antagonist	18.87	primary	male	3	ICSI	0.742	3.83	5.81	12.82	19.33	1	962.8	1.86	0.2	9.3	3	3	2019-04-19	2	1	0	0			- -
1026	2019-04-16 09:10	1-2	25	GnRH-antagonist	21.23	secondary	tubal	7	IVF	NA	6.09	3.24	47.96	7.11	1	924.6	2.45	0.257	11.7	9	4	2019-04-19	2	1	0	0			- -
1027	2019-04-16 10:10	0	28	GnRH-antagonist	22.32	primary	tubal	3	IVF	3.56	3.86	5.75	28.61	12.42	2	2190	1.39	0.735	7.6	20	1	2019-04-19	1	1	0	0			- -
1028	2019-04-18 08:40	0	26	GnRH-antagonist	19.22	primary	tubal	3	IVF	6.395	6.78	3.95	36.78	16	1	1835	4.5	0.533	10.8	7	1	2019-04-21	1	1	0	0			- -
1029	2019-04-19 08:30	0	32	GnRH-antagonist	24.03	primary	tubal	1	IVF	2.94	5.77	5.63	88	13.58	1	1821	2.57	0.432	12.1	12	1	2019-04-22	1	1	0	1	ectopic pregnancy		- -
1030	2019-04-21 08:43	1-2	43	GnRH-antagonist	17.97	secondary	male	2	IVF	0.866	10.09	8.4	36.26	15.33	1	1235	0.902	0.124	8.9	4	1	2019-04-24	1	1	0	0			- -
1031	2019-04-21 09:26	0	27	GnRH-antagonist	21.33	primary	male	4	IVF	5.303	6.69	5.88	31.36	18.45	2	2718	5.94	0.943	13	14	2	2019-04-24	2	1	0	0			- -
1032	2019-04-21 09:56	0	25	GnRH-antagonist	18.87	secondary	Unexplained	4	IVF	9.12	5.78	4.41	37.64	9.31	2	2055	2.2	0.578	11.3	11	2	2019-04-24	2	2	0	0			- -
1033	2019-04-22 09:56	0	45	GnRH-antagonist	19.04	secondary	Mixed	3	IVF	2.07	8.8	9.6	15.98	23.17	2	2107	3.46	0.463	9.8	5	1	2019-04-25	1	1	0	0			- -
1034	2019-04-23 08:50	1-2	36	GnRH-antagonist	23.07	primary	tubal	13	IVF	NA	12.98	6.46	21.94	7.91	1	1358	2.77	0.216	12.4	6	2	2019-04-26	2	1	0	0			- -
1035	2019-04-23 09:00	0	40	GnRH-antagonist	24.46	primary	male	2	ICSI	4.861	6.38	5.72	30.72	14.16	2	2046	4.02	1.1	12.6	14	2	2019-04-26	2	1	0	0			- -
1036	2019-04-23 09:35	≥3	37	GnRH-antagonist	25.91	secondary	tubal	2	IVF	2.863	6.51	3.02	35.03	10.35	1	1161	2.42	0.335	8.7	10	3	2019-04-26	2	2	0	1	intrauterine pregnancy		2020-01-10	39	vaginal	male	4.2
1037	2019-04-25 08:45	0	31	GnRH-antagonist	22.58	primary	tubal	7	IVF	1.45	6.81	3.17	44.51	19.53	2	2355	2.56	0.486	9	10	2	2019-04-28	2	2	0	0			- -
1038	2019-04-26 08:55	1-2	36	GnRH-antagonist	23.44	secondary	tubal	3	IVF	NA	6.81	1.77	26	13.5	1	1785	3.07	0.448	13.1	7	2	2019-04-29	2	1	0	0			- -
1039	2019-04-26 09:05	0	30	GnRH-antagonist	18.52	primary	Unexplained	3	IVF	6.41	7.14	3.73	17.86	9.6	2	2979	0.932	0.884	10.2	21	2	2019-04-29	2	2	0	0			- -
1040	2019-04-27 09:00	0	31	GnRH-antagonist	21.5	secondary	tubal	2	IVF	2.757	7.53	6.1	36.1	15.09	1	1586	5.22	0.822	8.9	7	2	2019-04-30	2	1	0	1	intrauterine pregnancy		2020-01-09	38	Cesarean	female	2.7
1041	2019-04-27 09:50	0	33	GnRH-antagonist	21.93	secondary	tubal	1	IVF	1.91	9.1	9.02	37	15.29	2	2548	3.8	0.748	10.5	11	2	2019-04-30	2	1	0	0			- -
1042	2019-04-30 08:40	0	33	GnRH-antagonist	24.22	primary	Endometriosis	4	IVF	3.88	9.38	5.38	31.85	12.08	1	1145	2.77	0.26	11.9	6	2	2019-05-03	2	2	0	1	intrauterine pregnancy	yes	- -
1043	2019-04-30 10:00	0	23	GnRH-antagonist	24.78	secondary	tubal	3	IVF	4.942	5.06	5.85	27.83	10.26	2	2001	12.8	0.709	9	11	2	2019-05-03	2	1	0	1	intrauterine pregnancy		2020-01-13	39	Cesarean	male	3.15
1044	2019-05-04 08:36	0	41	GnRH-antagonist	21.48	secondary	Mixed	3	IVF	1.463	6.19	4	54.1	16.6	1	1277	14.02	0.605	11.5	3	2	2019-05-07	2	1	0	0			- -
1045	2019-05-04 09:26	0	30	GnRH-antagonist	24.89	secondary	tubal	3	IVF	8.052	7.85	6.46	53.09	7.61	3	3139	3.04	1.22	8.2	12	2	2019-05-07	2	2	0	0			- -
1046	2019-05-04 09:55	≥3	41	GnRH-antagonist	25.24	primary	tubal	3	IVF	NA	3.92	1.7	55	12.91	2	2974	1.53	0.743	11.3	13	2	2019-05-07	2	2	0	0			- -
1047	2019-05-05 09:28	0	28	GnRH-antagonist	25.71	primary	Mixed	1	IVF	0.985	2.54	1.41	71.81	10.78	1	1280	3.51	0.59	10.6	9	2	2019-05-08	2	1	0	0			- -
1048	2019-05-06 08:56	0	41	GnRH-antagonist	29.52	secondary	tubal	4	IVF	0.419	7.29	3.72	17.3	11.73	1	1013	1.57	0.102	10	3	3	2019-05-09	2	1	0	0			- -
1049	2019-05-06 10:20	0	26	GnRH-antagonist	20.7	primary	Ovulatory	3	IVF	15.298	6.75	9.66	26.66	7.71	1	1709	1.18	0.512	8.6	6	1	2019-05-09	1	1	0	0			- -
1050	2019-05-10 09:25	1-2	41	GnRH-antagonist	23.34	secondary	tubal	2	IVF	1.58	9.16	2.29	10	11.61	1	1322	6.64	0.318	8.1	4	2	2019-05-13	2	2	0	0			- -
1051	2019-05-12 08:46	0	34	GnRH-antagonist	22.1	primary	tubal	1	IVF	0.639	12.04	2.92	44.76	15.65	1	1544	2.28	0.718	9.5	5	2	2019-05-15	2	1	0	1	intrauterine pregnancy		2020-01-27	38	vaginal	male	2.85
1052	2019-05-15 08:45	0	34	GnRH-antagonist	21.48	primary	tubal	10	IVF	1.96	5.23	4.69	29.7	14.55	1	988.1	4.46	0.465	10.1	7	4	2019-05-18	2	1	0	0			- -
1053	2019-05-16 09:45	0	31	GnRH-antagonist	20.96	primary	Ovulatory	6	IVF	1.72	3.22	5.25	28	20.37	2	2360	2.5	0.988	12.9	8	2	2019-05-19	2	2	0	0			- -
1054	2019-05-16 10:00	0	36	GnRH-antagonist	27.53	secondary	tubal	1	IVF	2.08	8.19	6.48	46.42	9.38	1	1640	5.03	0.512	9.7	5	1	2019-05-19	1	1	0	1	intrauterine pregnancy	yes	- -
1055	2019-05-17 08:59	0	44	GnRH-antagonist	19.77	secondary	tubal	3	IVF	1.91	12.79	6.74	46.3	16.8	1	893.9	13.69	0.359	9.3	3	2	2019-05-20	2	2	0	0			- -
1056	2019-05-17 09:16	1-2	28	GnRH-antagonist	18.9	primary	male	4	ICSI	1.065	7.79	9.21	29.39	12.17	1	419.7	2.51	0.091	9.7	1	1	2019-05-20	1	1	0	0			- -
1057	2019-05-18 09:25	0	28	GnRH-antagonist	16.49	primary	tubal	3	IVF	0.888	7.18	5.75	53.04	21.44	1	1246	5.62	0.673	9.3	3	2	2019-05-21	2	2	0	1	intrauterine pregnancy		2020-02-07	39	vaginal	female	3.45
1058	2019-05-20 08:56	0	32	GnRH-antagonist	23.5	primary	Ovulatory	1	IVF	0.53	9.81	3.39	33.37	14.92	1	490.1	3.75	0.438	9.3	3	1	2019-05-23	1	1	0	1	intrauterine pregnancy		2020-01-29	38	vaginal	male	3
1059	2019-05-21 09:00	1-2	39	GnRH-antagonist	27.06	secondary	tubal	13	IVF	0.764	10.06	6.75	10.17	16.14	1	1917	14.02	0.826	13.4	7	2	2019-05-24	2	2	0	1	intrauterine pregnancy	yes	- -
1060	2019-05-23 08:55	0	45	GnRH-antagonist	22.66	secondary	tubal	10	IVF	1.12	2.26	1.59	18.92	18.92	1	1162	2.98	0.18	11.1	5	3	2019-05-26	2	1	0	0			- -
1061	2019-05-23 09:25	1-2	35	GnRH-antagonist	27.53	primary	male	8	ICSI	1.621	7.39	4.59	63.51	19.78	1	1493	2.76	0.689	10.5	9	2	2019-05-26	2	2	0	0			- -
1062	2019-05-23 09:40	0	31	GnRH-antagonist	23.15	primary	male	4	ICSI	2.874	6.22	3.94	37.6	10.77	2	2723	3.62	0.959	8.1	15	2	2019-05-26	2	2	0	1	intrauterine pregnancy		2020-02-05	38	Cesarean	male	2.4	female	2.9
1063	2019-05-24 09:00	0	25	GnRH-antagonist	22.03	secondary	male	2	ICSI	1.819	7.49	2.38	15.32	12.33	1	1466	2.85	0.393	10.8	12	2	2019-05-27	2	2	0	0			- -
1064	2019-05-26 09:10	0	34	GnRH-antagonist	25.78	secondary	Ovulatory	1	IVF	0.491	6.29	2.06	26.43	12.93	1	960	3.28	0.294	7.7	6	2	2019-05-29	2	2	0	1	intrauterine pregnancy		2020-01-15	35	Cesarean	male	1.95	female	1.85
1065	2019-05-26 20:13	≥3	41	GnRH-antagonist	22.94	secondary	tubal	5	IVF	1.53	9.45	2.82	10.58	12.8	1	743.8	4.59	0.239	8.8	3	3	2019-05-29	2	2	0	0			- -
1066	2019-05-28 09:26	0	38	GnRH-antagonist	21.79	secondary	tubal	2	IVF	1.33	12.97	4.54	30.61	13.44	1	1218	7.44	1.21	11.2	4	2	2019-05-31	2	2	0	1	intrauterine pregnancy		2020-01-17	35	vaginal	male	2.3	male	2.75
1067	2019-06-01 08:55	0	38	GnRH-antagonist	17.31	secondary	Unexplained	1	IVF	1.179	7.34	4.3	64.8	34.51	2	2620	1.89	1.45	10.4	4	3	2019-06-04	2	2	0	0			- -
1068	2019-06-02 09:10	0	29	GnRH-antagonist	21.5	primary	male	6	ICSI	9.669	6.59	7.42	30.19	15.6	2	2036	1.62	1	12.1	22	1	2019-06-05	1	1	0	0			- -
1069	2019-06-02 09:30	0	32	GnRH-antagonist	26.64	primary	tubal	2	IVF	14.543	7.77	7.18	35.02	11.06	2	2382	1.86	0.258	9.2	6	2	2019-06-05	2	2	0	0			- -
1070	2019-06-04 08:50	0	38	GnRH-antagonist	NA	primary	Ovulatory	2	IVF	0.82	7.81	5.15	62.43	13.42	2	2926	5.07	0.588	7	9	2	2019-06-07	2	2	0	0			- -
1071	2019-06-04 09:00	0	33	GnRH-antagonist	23.34	secondary	tubal	2	IVF	1.09	6.83	3.44	44.04	16.6	1	1079	3.8	0.52	8	8	2	2019-06-07	2	2	0	0			- -
1072	2019-06-08 08:30	0	32	GnRH-antagonist	21.63	secondary	Ovulatory	10	IVF	0.366	7.73	5.02	48.87	20.49	1	1149	5.27	0.407	10.2	2	2	2019-06-11	2	2	0	1	intrauterine pregnancy		2020-03-02	40	vaginal	male	3.8
1073	2019-06-11 08:45	0	31	GnRH-antagonist	19.33	secondary	Ovulatory	3	IVF	0.457	13	0.35	59.29	13.39	1	636.8	0.753	0.169	8.2	3	3	2019-06-14	1	1	0	0			- -
1074	2019-06-11 11:30	1-2	31	GnRH-antagonist	22.83	primary	tubal	6	IVF	6.33	4.93	3.96	41.68	9.45	1	1762	4.84	0.71	10.4	10	2	2019-06-14	2	2	0	0			- -
1075	2019-06-13 08:45	0	32	GnRH-antagonist	21.36	secondary	tubal	6	IVF	3.06	6.43	6.48	34.88	18.8	1	1852	2.2	0.485	12.9	9	2	2019-06-16	2	2	0	0			- -
1076	2019-06-13 09:05	0	30	GnRH-antagonist	24.5	secondary	tubal	3	IVF	6.58	4.71	4.68	35.62	9.85	2	2785	3.62	0.569	11.9	18	2	2019-06-16	2	1	0	1	intrauterine pregnancy		2020-02-27	38	vaginal	female	3.5
1077	2019-06-14 09:05	0	27	GnRH-antagonist	24.61	secondary	tubal	3	IVF	5.01	5.29	7.69	31.99	9.15	3	3033	1.14	0.211	10.6	16	4	2019-06-17	2	2	0	1	intrauterine pregnancy		2020-01-30	34	Cesarean	female	1.8	female	2.2
1078	2019-06-14 10:30	0	27	GnRH-antagonist	21.5	secondary	tubal	2	IVF	2.96	4.37	3.57	34.23	14.92	1	1960	5.16	1.06	9.8	12	2	2019-06-17	2	1	0	1	intrauterine pregnancy		2020-03-07	40	vaginal	female	3.3
1079	2019-06-15 10:00	0	30	GnRH-antagonist	22.35	secondary	Unexplained	3	IVF	10.896	4.75	4.07	30.17	14.3	1	1163	1.1	0.295	11.7	15	4	2019-06-18	2	1	0	0			- -
1080	2019-06-16 09:00	0	30	GnRH-antagonist	20.7	secondary	tubal	2	IVF	6.125	7.55	3.02	33.33	12.39	1	1330	2.46	0.57	11.5	8	4	2019-06-19	2	1	0	1	intrauterine pregnancy	yes	- -
1081	2019-06-16 09:10	1-2	37	GnRH-antagonist	23.56	secondary	male	14	ICSI	0.58	8.05	4.83	38.29	19.73	3	3510	5.3	0.608	10.6	6	3	2019-06-19	2	1	1	1	intrauterine pregnancy	yes	- -
1082	2019-06-17 09:05	1-2	38	GnRH-antagonist	24.44	secondary	Ovulatory	7	IVF	0.366	10.5	4.42	21.33	12.1	1	490.3	2.05	0.167	10.2	2	2	2019-06-20	2	1	0	0			- -
1083	2019-06-21 09:00	1-2	36	GnRH-antagonist	18.26	primary	tubal	13	ICSI	1.12	8.31	3.25	44	19.14	1	1258	2.95	0.402	8.6	7	4	2019-06-24	2	1	0	0			- -
1084	2019-06-22 08:50	0	44	GnRH-antagonist	22.04	secondary	tubal	4	IVF	0.733	10.57	4.39	62.94	18.06	1	1238	3.06	0.338	11.8	3	1	2019-06-25	1	1	0	0			- -
1085	2019-06-24 08:35	0	41	GnRH-antagonist	27.34	secondary	tubal	1	IVF	2.832	7.5	3.29	34.68	14.04	1	1015	4.54	0.449	10.3	3	2	2019-06-27	2	2	0	0			- -
1086	2019-06-25 08:40	0	38	GnRH-antagonist	23.53	secondary	Mixed	3	IVF	0.121	12.01	3.4	37.8	10.48	1	649.7	2.68	0.288	11.2	4	3	2019-06-28	2	1	0	0			- -
1087	2019-06-25 08:50	1-2	29	GnRH-antagonist	21.64	secondary	male	2	ICSI	NA	5.62	3.14	27.16	15.22	2	2461	3.16	1.01	10.4	8	2	2019-06-28	2	2	0	1	intrauterine pregnancy		2020-03-01	37	vaginal	female	2.42
1088	2019-06-28 08:40	0	30	GnRH-antagonist	20.06	primary	tubal	3	IVF	4.1	6.73	10.53	50.22	9.75	1	1931	6.25	0.503	12.5	7	2	2019-07-01	2	1	0	0			- -
1089	2019-07-01 09:05	1-2	30	GnRH-antagonist	17.8	primary	Unexplained	3	IVF	NA	9.36	4.91	63	15.6	1	1864	4.88	1.11	11.8	4	4	2019-07-04	2	1	0	0			- -
1090	2019-07-02 10:10	0	38	GnRH-antagonist	20.31	primary	Ovulatory	4	IVF	0.642	5.91	2.53	42	18.13	1	1083	5.7	0.492	8	6	2	2019-07-05	2	1	0	0			- -
1091	2019-07-03 09:05	1-2	31	GnRH-antagonist	21.37	primary	Ovulatory	3	IVF	0.508	8.41	3.84	42	18.78	1	758.2	5.98	0.347	10.6	2	2	2019-07-06	2	1	0	0			- -
1092	2019-07-03 10:00	1-2	40	GnRH-antagonist	20.43	secondary	Unexplained	1	IVF	0.948	6.03	5.72	77.8	20.36	1	1818	2.36	1.02	11.6	8	2	2019-07-06	2	2	0	0			- -
1093	2019-07-07 09:00	0	36	GnRH-antagonist	20.03	secondary	tubal	3	IVF	NA	6.99	6.73	53.12	18.33	1	1668	3.53	0.933	11.6	4	2	2019-07-10	2	1	0	0			- -
1094	2019-07-08 09:26	1-2	36	GnRH-antagonist	21.88	secondary	Ovulatory	1	IVF	0.578	6.89	4.27	30.58	13.83	1	1362	3.9	0.721	11.9	7	2	2019-07-11	2	1	0	1	intrauterine pregnancy		2020-04-02	40	vaginal	female	3.3
1095	2019-07-13 09:16	1-2	39	GnRH-antagonist	24.03	secondary	Unexplained	2	IVF	0.31	11.22	5.43	32.46	17.25	1	1103	3.24	1.41	13.2	5	5	2019-07-16	2	2	0	1	intrauterine pregnancy		2020-04-05	40	Cesarean	female	3.75
1096	2019-07-13 09:46	0	35	GnRH-antagonist	22.83	secondary	Endometriosis	5	IVF	2.387	6.52	4.33	42.82	10.86	1	1383	4.23	0.749	11.9	8	4	2019-07-16	2	1	0	1	intrauterine pregnancy	yes	- -
1097	2019-07-14 09:25	0	29	GnRH-antagonist	30.11	secondary	tubal	5	IVF	2.203	6.51	4.68	46.3	13.4	2	2795	12.54	1.11	11.3	13	2	2019-07-17	2	1	0	1	heterotopic pregnancy		2020-04-02	39	Cesarean	male	3.55
1098	2019-07-16 08:50	1-2	41	GnRH-antagonist	26.37	secondary	tubal	1	IVF	0.624	12.62	3.79	28.6	11.8	1	937.3	6.4	0.561	12.2	2	2	2019-07-19	2	1	0	1	intrauterine pregnancy	yes	- -
1099	2019-07-16 09:10	0	36	GnRH-antagonist	20.17	primary	tubal	3	IVF	0.264	8.3	3.37	33.65	13.37	1	1715	7.21	0.751	8.3	7	1	2019-07-19	1	1	0	1	intrauterine pregnancy		2020-03-21	37	Cesarean	male	3.15
1100	2019-07-17 08:40	0	27	GnRH-antagonist	20.03	secondary	tubal	1	IVF	2.378	8.95	3.08	61.18	9.28	1	1112	2.02	0.218	8.4	5	4	2019-07-20	2	2	0	1	ectopic pregnancy		- -
1101	2019-07-20 09:20	0	43	GnRH-antagonist	23.05	secondary	tubal	2	IVF	0.935	6.36	2.61	36.22	16.92	1	1839	1.92	0.718	10.5	15	2	2019-07-23	2	2	0	0			- -
1102	2019-07-25 09:10	0	23	GnRH-antagonist	18.07	primary	tubal	2	IVF	6.667	5.248	6.71	41.56	7.02	2	2750	2.47	0.59	8.7	15	1	2019-07-28	1	1	0	0			- -
1103	2019-07-27 09:40	1-2	39	GnRH-antagonist	22.77	secondary	tubal	2	IVF	4.71	5.73	7.1	23.08	10.09	3	3544	1.79	0.691	10.7	17	2	2019-07-30	2	2	0	0			- -
1104	2019-07-28 09:05	0	41	GnRH-antagonist	25.28	primary	male	11	ICSI	5.614	6.66	4.76	34.33	10.64	1	1282	3.17	0.659	11.7	4	2	2019-07-31	2	1	0	1	intrauterine pregnancy	yes	- -
1105	2019-07-28 10:20	0	34	GnRH-antagonist	20.7	secondary	tubal	3	IVF	5.878	5.34	9.58	47.68	6.13	2	2501	2.53	0.512	9.9	7	2	2019-07-31	2	1	0	1	intrauterine pregnancy		2020-04-01	37	Cesarean	male	3
1106	2019-07-31 10:45	1-2	33	GnRH-antagonist	19.53	secondary	male	6	IVF	6.519	5.41	3.18	33.45	11.68	3	3194	4.84	0.851	10.2	16	2	2019-08-03	2	2	0	1	intrauterine pregnancy		2020-04-10	37	Cesarean	female	3.05
1107	2019-08-01 09:45	0	27	GnRH-antagonist	21.78	primary	Unexplained	3	IVF	6.668	6.28	5.26	28.54	8.18	1	1130	1.51	0.33	11.9	7	1	2019-08-04	1	1	0	1	intrauterine pregnancy		2020-04-24	40	Cesarean	female	3.3
1108	2019-08-02 09:40	0	40	GnRH-antagonist	NA	secondary	male	0	ICSI	0.232	12.36	7.09	34.41	17.35	1	885.4	3.93	0.223	13.2	5	3	2019-08-05	1	1	0	1	intrauterine pregnancy		2020-04-05	37	Cesarean	female	3.9
1109	2019-08-02 10:05	0	33	GnRH-antagonist	21.16	secondary	tubal	1	IVF	1.071	5.82	4.74	34.29	13.12	1	1038	4.59	0.187	11	4	1	2019-08-05	1	1	0	1	intrauterine pregnancy	yes	- -
1110	2019-08-03 09:10	0	24	GnRH-antagonist	18.73	primary	male	2	ICSI	2.406	5.78	4.92	32.13	15.89	1	1320	6.13	0.568	11.3	10	2	2019-08-06	2	2	0	1	intrauterine pregnancy		2020-02-21	30	Cesarean	male	1.45	female	1.45
1111	2019-08-08 09:25	0	30	GnRH-antagonist	27.11	secondary	tubal	1	IVF	1.285	6.34	4.78	39.2	9.38	1	1025	4.42	0.512	9.8	5	2	2019-08-11	2	2	0	1	intrauterine pregnancy		2020-05-04	40	Cesarean	female	3.15
1112	2019-08-10 09:30	0	38	GnRH-antagonist	23.92	secondary	tubal	1	IVF	0.92	8.05	9.87	27.67	17.84	1	1850	8.24	0.677	7.3	6	1	2019-08-13	1	1	0	0			- -
1113	2019-08-10 09:30	0	31	GnRH-antagonist	20.43	secondary	tubal	6	IVF	6.783	3.78	3.87	24	10.57	1	1533	4.75	0.747	13.4	8	2	2019-08-13	2	2	0	1	intrauterine pregnancy		2020-05-01	39	vaginal	male	3.45
1114	2019-08-12 09:00	1-2	41	GnRH-antagonist	24.24	secondary	Unexplained	1	IVF	0.836	8.38	3.34	19.93	17.7	1	955.8	1.4	0.291	13.8	5	3	2019-08-15	1	1	0	1	intrauterine pregnancy		2020-04-18	37	Cesarean	female	3.25
1115	2019-08-12 09:15	0	29	GnRH-antagonist	22.43	primary	Unexplained	5	IVF	0.847	7.7	3.57	17.71	20.36	1	1603	8.54	0.587	8.6	4	1	2019-08-15	1	1	0	0			- -
1116	2019-08-12 09:40	1-2	31	GnRH-antagonist	23.93	secondary	tubal	1	IVF	1.953	6.63	3.22	47.46	18.3	1	1494	6.9	0.62	9.3	7	2	2019-08-15	2	1	0	0			- -
1117	2019-08-13 08:55	≥3	32	GnRH-antagonist	24.03	primary	tubal	8	ICSI	0.243	5.76	2.37	10.7	22	1	1517	3.5	1.39	11.4	6	5	2019-08-16	2	2	0	0			- -
1118	2019-08-14 08:45	1-2	39	GnRH-antagonist	22.06	secondary	Ovulatory	2	IVF	0.323	11.08	7.33	13.55	22.63	1	1211	4.66	1.46	11	4	4	2019-08-17	2	1	0	1	intrauterine pregnancy	yes	- -
1119	2019-08-16 09:00	0	33	GnRH-antagonist	29.38	primary	male	6	IVF	4.688	7.09	9.08	42.36	11.2	2	2677	5.3	0.681	10.7	12	1	2019-08-19	1	1	0	1	intrauterine pregnancy		2020-04-22	37	vaginal	male	3.12
1120	2019-08-17 08:46	0	32	GnRH-antagonist	20.96	primary	tubal	6	IVF	1.361	10.02	6.85	19.56	14.59	1	745.8	7.62	0.536	9.2	4	3	2019-08-20	2	2	0	0			- -
1121	2019-08-17 10:06	1-2	29	GnRH-antagonist	20.28	primary	tubal	2	IVF	7.027	8.33	7.71	37.4	12.25	2	2493	2.62	1.07	10.8	6	2	2019-08-20	2	2	0	0			- -
1122	2019-08-18 09:35	0	32	GnRH-antagonist	20.5	secondary	Unexplained	4	IVF	3.5	8.04	4.61	50.7	18.66	1	1510	3.29	0.514	11.6	9	2	2019-08-21	2	2	0	1	intrauterine pregnancy		2020-04-15	36	Cesarean	male	2.93	female	2.73
1123	2019-08-19 09:55	0	33	GnRH-antagonist	23.42	primary	tubal	3	IVF	1.896	8.04	4.6	45.64	14.23	1	1623	2.48	0.715	10	7	4	2019-08-22	2	2	0	1	intrauterine pregnancy	yes	- -
1124	2019-08-21 08:35	0	29	GnRH-antagonist	19.83	primary	tubal	5	IVF	3.232	6.88	8.74	49.51	12.03	2	2112	5.96	0.72	8	9	2	2019-08-24	2	2	0	1	intrauterine pregnancy		2020-05-22	41	Cesarean	male	4.1
1125	2019-08-22 08:55	0	32	GnRH-antagonist	24.61	secondary	male	2	ICSI	6.011	8.38	9.1	55.08	12.08	1	936.1	2.74	0.393	10.8	4	3	2019-08-25	2	2	0	0			- -
1126	2019-08-22 09:45	0	28	GnRH-antagonist	19.1	primary	Ovulatory	4	IVF	1.104	4.37	1.86	73.78	20.7	1	1158	4.86	0.408	9.3	5	4	2019-08-25	2	2	0	1	intrauterine pregnancy		2020-04-24	37	Cesarean	male	NA	male	NA
1127	2019-08-23 09:35	0	35	GnRH-antagonist	21.11	secondary	tubal	8	IVF	3.878	7.76	10.07	33.71	13.7	2	2096	13.7	0.787	10.5	6	4	2019-08-26	2	2	0	0			- -
1128	2019-08-26 08:50	0	35	GnRH-antagonist	26.22	secondary	tubal	1	IVF	3.715	6.01	7.5	62.3	11.72	1	1375	7.65	0.505	10.6	8	3	2019-08-29	2	1	0	1	intrauterine pregnancy	yes	- -
1129	2019-08-28 08:55	1-2	28	GnRH-antagonist	18.44	primary	tubal	5	IVF	1.483	5.72	3.55	60.05	24.57	1	1207	1.75	0.768	9	5	3	2019-08-31	2	1	0	0			- -
1130	2019-09-02 09:50	0	31	GnRH-antagonist	25.71	secondary	tubal	3	IVF	3.06	5.74	8.7	28.59	9.66	1	1145	3.7	0.353	8.6	12	2	2019-09-05	1	1	0	1	intrauterine pregnancy	yes	- -
1131	2019-09-03 09:40	0	40	GnRH-antagonist	28.44	secondary	tubal	6	IVF	0.403	8.83	5.37	46.51	16.84	2	2277	6.1	0.763	13.2	5	3	2019-09-06	2	2	0	1	intrauterine pregnancy	yes	- -
1132	2019-09-04 08:45	0	27	GnRH-antagonist	22.58	primary	tubal	3	IVF	5.73	6.27	6.61	43.02	7.5	1	1335	2.84	0.246	11.2	8	3	2019-09-07	2	2	0	1	intrauterine pregnancy		2020-05-15	38	Cesarean	male	3.4
1133	2019-09-05 09:50	0	33	GnRH-antagonist	19.72	secondary	tubal	2	IVF	0.585	7.41	6.22	48.53	13.51	2	2205	2.34	0.426	9.9	4	2	2019-09-08	2	1	0	1	intrauterine pregnancy		2020-05-19	38	Cesarean	male	2.4	male	2.6
1134	2019-09-09 08:45	1-2	35	GnRH-antagonist	21.16	primary	male	6	ICSI	0.426	11.58	6.1	19.84	15.54	1	1150	4.62	0.361	12.4	7	2	2019-09-12	2	2	0	1	intrauterine pregnancy		2020-05-28	38	vaginal	female	3.2
1135	2019-09-10 09:10	0	31	GnRH-antagonist	22.83	primary	Endometriosis	9	IVF	17.299	4.11	5.68	45.34	6.72	1	995	0.09	1.15	7	19	2	2019-09-13	2	2	0	0			- -
1136	2019-09-12 09:25	0	29	GnRH-antagonist	19.53	primary	Ovulatory	6	IVF	9.46	7.52	6.69	67.62	9.02	3	3321	1.77	0.293	13.6	10	2	2019-09-15	2	2	0	0			- -
1137	2019-09-13 09:25	0	40	GnRH-antagonist	20.72	secondary	tubal	5	IVF	4.971	9.05	4.82	67.47	15.7	1	1943	6.48	0.502	10.2	10	3	2019-09-16	2	2	0	0			- -
1138	2019-09-16 09:06	1-2	38	GnRH-antagonist	17.93	secondary	tubal	2	IVF	NA	7.72	2.94	39.07	17.09	1	889.8	1.02	0.326	10.5	6	1	2019-09-19	1	1	0	1	intrauterine pregnancy		2020-06-12	40	vaginal	male	3.15
1139	2019-09-16 10:30	0	33	GnRH-antagonist	19.11	primary	tubal	5	IVF	6.514	6.08	6.12	32.06	17.3	1	1749	5.04	0.585	14.7	12	2	2019-09-19	2	2	0	1	intrauterine pregnancy		2020-05-24	37	Cesarean	female	2.5	female	2.5
1140	2019-09-18 09:03	0	39	GnRH-antagonist	20.55	secondary	Ovulatory	5	IVF	1.824	8.99	6.12	28.33	13.49	1	1201	1.46	0.365	9.8	6	4	2019-09-21	2	2	0	1	heterotopic pregnancy	yes	- -
1141	2019-09-22 09:05	0	46	GnRH-antagonist	20.58	secondary	male	3	ICSI	2.29	3.49	4.09	59.78	13.58	1	1763	4.03	0.311	9.8	6	2	2019-09-25	2	1	0	0			- -
1142	2019-09-24 08:43	1-2	37	GnRH-antagonist	19.23	primary	tubal	2	IVF	4.4	9.31	7.61	22.26	13.2	4	4715	3.7	0.871	9.8	11	2	2019-09-27	2	2	0	1	intrauterine pregnancy		2020-04-20	31	Cesarean	female	1.48	female	1.56
1143	2019-09-26 08:45	0	36	GnRH-antagonist	27.47	secondary	tubal	3	IVF	1.216	8.33	5.01	17.6	10.38	1	944.4	4.18	0.327	9.6	3	1	2019-09-29	1	1	0	1	intrauterine pregnancy		2020-04-18	31	Cesarean	male	1.5
1144	2019-09-26 09:20	1-2	27	GnRH-antagonist	24.22	primary	tubal	11	ICSI	5.496	5.49	4.66	32.98	10.43	1	1738	4.11	0.29	14.1	13	4	2019-09-29	2	2	0	0			- -
1145	2019-09-30 08:30	0	34	GnRH-antagonist	23.44	primary	Mixed	6	IVF	0.4	6.12	4.18	34.65	26.41	1	995	4.72	0.685	10	4	2	2019-10-03	1	1	0	0			- -
1146	2019-09-30 08:45	1-2	32	GnRH-antagonist	20.47	primary	Ovulatory	3	IVF	0.589	10.45	2.06	69.21	18.83	1	1435	1.1	0.394	10.4	6	2	2019-10-03	2	2	0	0			- -
1147	2019-10-01 09:45	1-2	27	GnRH-antagonist	20.7	primary	Ovulatory	3	ICSI	15.298	6.75	9.66	26.66	7.9	1	1745	2.3	0.389	9.2	2	2	2019-10-04	2	1	0	0			- -
1148	2019-10-02 09:30	0	24	GnRH-antagonist	22.89	primary	tubal	2	IVF	15.04	6.44	5.85	36.04	10.02	2	2726	2.95	0.664	10.3	12	2	2019-10-05	2	2	0	0			- -
1149	2019-10-03 08:40	0	41	GnRH-antagonist	22.94	secondary	male	10	ICSI	1.133	7.43	3.99	33.1	8.04	1	1765	2.97	0.29	7.5	3	1	2019-10-06	1	1	0	0			- -
1150	2019-10-05 09:15	0	35	GnRH-antagonist	22.48	secondary	male	2	ICSI	3.041	6.3	3.12	35.83	12.23	2	2262	4.59	0.903	11	9	3	2019-10-08	2	1	0	1	intrauterine pregnancy		2020-06-26	39	vaginal	male	3.7
1151	2019-10-14 08:56	1-2	29	GnRH-antagonist	26.37	secondary	tubal	5	IVF	2.192	10.01	4.84	20.38	9.98	1	1426	2.95	0.299	12	3	1	2019-10-17	1	1	0	0			- -
1152	2019-10-15 08:55	1-2	38	GnRH-antagonist	29.3	primary	tubal	9	IVF	1.184	7.89	4.13	33.35	9.57	1	988.2	3.43	0.327	12.6	3	2	2019-10-18	2	1	0	0			- -
1153	2019-10-16 08:45	0	32	GnRH-antagonist	21.64	primary	Endometriosis	2	IVF	1.327	8.28	3.5	37.34	17.18	1	1166	4.52	0.39	9.5	3	2	2019-10-19	1	1	0	0			- -
1154	2019-10-18 08:58	0	30	GnRH-antagonist	18.03	primary	Ovulatory	1	ICSI	2.344	6.05	4.4	52.71	18	3	3721	1.7	0.915	14	11	4	2019-10-21	2	1	0	0			- -
1155	2019-10-19 08:56	0	27	GnRH-antagonist	21.1	secondary	tubal	0	IVF	1.695	7.35	5.34	39.32	17.02	2	2674	2.97	1.28	10.1	5	2	2019-10-22	2	1	0	0			- -
1156	2019-10-21 08:46	0	26	GnRH-antagonist	18.26	secondary	tubal	1	IVF	0.752	5.79	4.28	42.81	33.63	2	2053	2	0.58	8.8	3	2	2019-10-24	2	1	1	1	intrauterine pregnancy		2020-06-23	36	Cesarean	female	2	female	2.35
1157	2019-10-21 10:16	0	28	GnRH-antagonist	24.24	secondary	tubal	4	IVF	2.229	3.21	1.32	36.6	8.63	1	1033	1	0.243	11.4	11	2	2019-10-24	2	1	0	1	intrauterine pregnancy		2020-07-05	38	Cesarean	female	3
1158	2019-10-22 08:56	0	38	GnRH-antagonist	26.37	secondary	Mixed	2	ICSI	0.416	6.29	4.19	72.93	9.22	1	1030	4.57	0.37	8.2	8	2	2019-10-25	2	2	0	1	intrauterine pregnancy	yes	- -
1159	2019-10-22 09:40	0	38	GnRH-antagonist	29.69	secondary	Ovulatory	2	IVF	0.736	8.33	3.67	33.59	14.58	1	532.9	4.91	0.454	10.7	2	2	2019-10-25	2	1	0	0			- -
1160	2019-10-26 08:45	0	22	GnRH-antagonist	23.05	primary	male	1	ICSI	0.832	6.74	6.47	70.41	18.78	1	1446	4.9	1.3	10.5	8	2	2019-10-29	2	2	0	0			- -
1161	2019-10-26 09:20	1-2	35	GnRH-antagonist	17.91	secondary	tubal	2	IVF	1.924	7.26	5.55	33.53	19.6	1	1139	1.31	0.218	8.7	5	2	2019-10-29	2	2	0	0			- -
1162	2019-10-27 08:35	0	42	GnRH-antagonist	19.11	secondary	tubal	1	IVF	7.31	8.57	3.34	33.64	13.89	2	2639	2.97	1.09	10.4	7	2	2019-10-30	2	2	0	1	intrauterine pregnancy		2020-07-16	39	Cesarean	female	3
1163	2019-10-28 08:56	1-2	28	GnRH-antagonist	21.93	primary	Unexplained	2	IVF	7.791	5.05	6.09	31.94	10.54	1	1977	1.98	0.35	9.2	9	1	2019-10-31	1	1	0	1	intrauterine pregnancy	yes	- -
1164	2019-10-30 09:26	1-2	38	GnRH-antagonist	20.13	primary	tubal	4	IVF	3.722	9.48	7.35	58	18.9	1	1591	2.4	0.48	11	8	2	2019-11-02	2	2	0	1	intrauterine pregnancy		2020-07-15	39	Cesarean	female	2.82
1165	2019-10-31 09:40	0	36	GnRH-antagonist	24.91	primary	Mixed	1	ICSI	5.35	5.26	5.74	58	8.31	1	1738	2.35	0.642	8.8	7	2	2019-11-03	2	1	0	0			- -
1166	2019-11-01 08:55	0	32	GnRH-antagonist	21.76	secondary	Unexplained	3	IVF	0.68	11.48	4.92	38.85	16.01	1	1208	3.33	0.58	12.2	2	2	2019-11-04	2	2	0	1	intrauterine pregnancy	yes	- -
1167	2019-11-01 10:03	0	29	GnRH-antagonist	22.27	primary	Ovulatory	5	IVF	11.672	8.58	3.99	57.69	8.99	1	1349	2.05	0.518	10.8	13	2	2019-11-04	2	2	0	1	intrauterine pregnancy		2020-07-06	37	Cesarean	female	2.45	female	1.9
1168	2019-11-02 09:05	0	34	GnRH-antagonist	19.56	secondary	tubal	3	IVF	1.918	9.42	8.58	52.2	17.5	1	1593	5	0.67	12.4	6	2	2019-11-05	2	1	0	0			- -
1169	2019-11-03 08:30	0	32	GnRH-antagonist	20.55	secondary	Endometriosis	2	IVF	1.093	5.76	3.38	47.67	10.41	1	1430	1.72	0.738	8.8	6	1	2019-11-06	1	1	0	1	intrauterine pregnancy		2020-07-15	37	Cesarean	female	2.65
1170	2019-11-04 09:05	≥3	45	GnRH-antagonist	28.25	secondary	Ovulatory	3	IVF	1.594	6.62	4.8	33.23	13.73	1	1769	5.12	0.589	7.3	6	2	2019-11-07	2	1	0	0			- -
1171	2019-11-05 08:55	0	28	GnRH-antagonist	20.7	secondary	tubal	3	IVF	1.515	6.11	4.15	58.11	14.54	1	983.8	2.79	0.397	14	3	2	2019-11-08	2	2	0	1	intrauterine pregnancy		2020-07-08	37	Cesarean	male	2.5	male	3
1172	2019-11-07 09:30	1-2	29	GnRH-antagonist	19.07	secondary	Endometriosis	1	IVF	0.21	21.59	8.04	48.24	21.38	1	1580	1.7	0.352	7.9	8	2	2019-11-10	2	2	0	0			- -
1173	2019-11-09 09:25	1-2	31	GnRH-antagonist	23.93	secondary	tubal	1	IVF	1.953	6.63	3.22	47.46	18.31	2	2015	3.64	0.92	10	14	2	2019-11-12	2	2	0	0			- -
1174	2019-11-10 09:30	0	29	GnRH-antagonist	20.7	primary	tubal	3	IVF	9.246	5.95	7.74	35.72	10.26	2	2776	3.25	1.01	11.9	10	2	2019-11-13	2	2	0	1	heterotopic pregnancy		2020-07-22	38	vaginal	male	2.95
1175	2019-11-15 08:40	0	30	GnRH-antagonist	20.17	secondary	tubal	2	IVF	2.271	5.35	6.05	26.58	9.1	1	1759	1.64	0.444	14	6	2	2019-11-18	2	2	0	1	intrauterine pregnancy		2020-08-09	40	vaginal	male	3.5
1176	2019-11-16 09:05	1-2	28	GnRH-antagonist	19.1	secondary	tubal	1	IVF	NA	9.19	6.62	7.01	11.14	1	1308	1.67	0.318	11.1	7	4	2019-11-19	2	1	0	0			- -
1177	2019-11-16 09:15	0	25	GnRH-antagonist	19.53	secondary	Mixed	2	IVF	5.172	5.23	4.4	32.56	12.02	3	3952	6.21	0.78	12.2	18	2	2019-11-19	2	2	0	0			- -
1178	2019-11-17 08:55	1-2	33	GnRH-antagonist	21.16	secondary	tubal	4	IVF	0.664	5.43	2.91	3.036	16.97	1	1326	2.8	0.746	8.9	3	1	2019-11-20	1	1	0	0			- -
1179	2019-11-17 08:55	0	29	GnRH-antagonist	19.47	secondary	tubal	1	IVF	3.13	7.07	5.56	70.15	13.36	1	1313	1.15	0.398	8.3	11	2	2019-11-20	2	2	0	1	intrauterine pregnancy		2020-07-16	36	Cesarean	male	2.9	male	2.5
1180	2019-11-20 08:00	0	33	GnRH-antagonist	25.71	secondary	tubal	2	IVF	1.35	7.45	3.38	75	9.83	1	1066	2.76	0.196	8.8	5	2	2019-11-23	2	1	0	1	intrauterine pregnancy		2020-07-18	36	Cesarean	female	2.6	female	2.6
1181	2019-11-20 09:05	0	36	GnRH-antagonist	21.43	secondary	Endometriosis	1	IVF	0.67	9.45	6.53	17.84	26.53	2	2386	2.91	0.979	7.2	6	1	2019-11-23	1	1	0	0			- -
1182	2019-11-22 09:05	≥3	32	GnRH-antagonist	21.19	secondary	male	2	ICSI	3.264	2.05	0.43	5	12.7	2	2487	2.27	0.74	11.3	15	2	2019-11-25	2	1	0	0			- -
1183	2019-11-22 09:25	0	22	GnRH-antagonist	20.7	primary	Mixed	2	IVF	3.792	6.31	6.49	43.37	15.2	2	2762	2.6	0.535	9.6	8	2	2019-11-25	2	2	1	1	intrauterine pregnancy		2020-08-04	38	vaginal	female	3.35
1184	2019-11-22 09:45	1-2	30	GnRH-antagonist	17.35	primary	male	1	ICSI	4.89	9.06	7.07	49.4	20.77	1	1313	1.35	0.687	7.8	6	2	2019-11-25	2	2	0	0			- -
1185	2019-11-24 09:10	1-2	32	GnRH-antagonist	21.6	primary	Unexplained	3	IVF	0.826	5.13	3.6	31.71	21.9	1	1815	2.9	0.979	7.9	7	3	2019-11-27	2	1	0	0			- -
1186	2019-11-25 08:55	0	38	GnRH-antagonist	20.69	secondary	Ovulatory	2	IVF	0.756	6.8	4.5	39.86	14.43	1	1074	5.4	0.418	8.7	5	4	2019-11-28	2	2	0	1	intrauterine pregnancy		2020-07-31	37	Cesarean	male	2.6	male	3.1
1187	2019-11-25 09:10	0	36	GnRH-antagonist	21.63	secondary	Mixed	3	ICSI	2.51	8.96	1.95	20.74	17.04	1	1799	3.46	0.522	9.4	10	4	2019-11-28	2	2	0	1	intrauterine pregnancy		2020-08-10	38	vaginal	male	3.5
1188	2019-11-26 09:30	1-2	30	GnRH-antagonist	NA	secondary	Endometriosis	0	IVF	NA	5.43	8.11	25.6	9.11	2	2716	2.17	0.376	11.6	8	2	2019-11-29	2	2	1	1	intrauterine pregnancy	yes	- -
1189	2019-11-27 09:30	0	30	GnRH-antagonist	26.67	primary	tubal	5	IVF	2.288	6.59	4.98	34.1	10.87	1	1656	1.35	0.688	15.1	7	2	2019-11-30	2	1	0	1	intrauterine pregnancy	yes	- -
1190	2019-11-29 09:10	0	34	GnRH-antagonist	21.03	secondary	tubal	1	IVF	0.764	6.37	2.34	22.09	20.82	1	767.4	4.62	0.563	9	4	1	2019-12-02	1	1	0	1	intrauterine pregnancy		2020-08-21	39	Cesarean	male	3.33
1191	2019-12-02 09:02	0	36	GnRH-antagonist	25.39	primary	Mixed	14	IVF	2.97	5.87	5.26	11.62	13.17	1	1462	3.15	1.04	9.8	9	2	2019-12-05	2	1	1	1	intrauterine pregnancy		2020-08-26	40	Cesarean	male	3.7
1192	2019-12-02 09:46	0	35	GnRH-antagonist	25.81	secondary	male	11	IVF	5.437	6	5.28	12.89	11.84	1	1835	3.78	0.576	14.7	16	2	2019-12-05	2	2	0	1	intrauterine pregnancy		2020-06-28	38	Cesarean	female	4.1
1193	2019-12-02 09:53	0	44	GnRH-antagonist	22.96	secondary	Mixed	5	ICSI	1.25	7.57	3.33	47.16	13.62	1	1942	3.79	0.329	10.1	10	2	2019-12-05	2	2	0	0			- -
1194	2019-12-03 10:10	0	27	GnRH-antagonist	21.99	secondary	tubal	2	IVF	2.492	5.22	3.8	21.87	9.31	1	1608	3.95	0.32	12.2	10	4	2019-12-06	2	2	0	1	intrauterine pregnancy		2020-08-19	39	vaginal	male	3.05
1195	2019-12-04 10:15	0	36	GnRH-antagonist	17.91	primary	Ovulatory	2	IVF	12.039	5.2	6.15	33.87	14.62	3	3240	2.59	0.745	11.9	19	1	2019-12-07	1	1	0	0			- -
1196	2019-12-06 08:45	0	35	GnRH-antagonist	20.7	primary	Ovulatory	8	IVF	0.39	15.87	3.3	37.99	16.7	1	817	7.5	0.313	9.7	2	2	2019-12-09	2	1	0	0			- -
1197	2019-12-06 09:30	0	30	GnRH-antagonist	20.96	primary	male	2	IVF	6.61	5.59	3.54	30.24	10.59	2	2862	2.22	0.764	9.3	12	2	2019-12-09	2	2	0	0			- -
1198	2019-12-07 09:00	1-2	40	GnRH-antagonist	19.2	secondary	Ovulatory	2	ICSI	1.9	4.93	4.34	51.31	24	3	3657	4.95	0.669	9.8	4	3	2019-12-10	2	1	0	1	intrauterine pregnancy		2020-08-19	38	Cesarean	male	3.15
1199	2019-12-08 09:40	1-2	32	GnRH-antagonist	21.64	primary	Endometriosis	2	IVF	1.327	8.28	3.5	37.34	26.58	1	1891	0.599	0.664	12.7	5	4	2019-12-11	1	1	0	0			- -
1200	2019-12-10 08:40	0	36	GnRH-antagonist	23.44	secondary	tubal	1	IVF	1.249	6.3	3.55	41.34	16.46	1	1738	4.75	1.11	11	7	2	2019-12-13	2	1	0	0			- -
1201	2019-12-11 10:06	0	29	GnRH-antagonist	20.43	secondary	Endometriosis	2	IVF	3.45	4.51	9.43	38.8	9.9	2	2428	4.1	0.441	8.3	11	2	2019-12-14	2	2	0	1	intrauterine pregnancy	yes	- -
1202	2019-12-13 08:42	≥3	40	GnRH-antagonist	19.63	secondary	Ovulatory	6	IVF	0.294	15.16	7.44	34.85	10.58	1	448.1	2.33	0.287	7.7	3	2	2019-12-16	1	1	0	0			- -
1203	2019-12-13 09:20	0	36	GnRH-antagonist	18.73	primary	Endometriosis	5	IVF	2.115	6.6	9.47	54.76	15	3	3856	5.7	0.76	10.2	13	2	2019-12-16	2	2	0	1	intrauterine pregnancy		2020-08-26	38	Cesarean	male	2.95
1204	2019-12-14 08:30	≥3	46	GnRH-antagonist	19.72	secondary	tubal	2	IVF	0.4	6.15	4.74	31.56	13.18	1	1244	3.74	0.373	9.6	2	1	2019-12-17	1	1	0	0			- -
1205	2019-12-14 08:50	0	36	GnRH-antagonist	17.69	secondary	tubal	3	IVF	0.938	5.86	3.88	73.23	7.87	1	1148	1.08	0.162	11	5	4	2019-12-17	2	2	0	1	intrauterine pregnancy	yes	- -
1206	2019-12-14 09:00	1-2	36	GnRH-antagonist	19.6	primary	tubal	2	IVF	2.7	8.57	7.3	68	13.46	1	1308	3.07	0.57	11	6	4	2019-12-17	2	2	0	0			- -
1207	2019-12-14 09:30	0	29	GnRH-antagonist	20.45	secondary	Endometriosis	2	IVF	2.02	5.9	4.01	34	16.54	1	1851	1.98	1.03	9.3	13	2	2019-12-17	2	1	0	0			- -
1208	2019-12-15 08:45	≥3	39	GnRH-antagonist	23.44	primary	Ovulatory	2	IVF	0.293	4.73	2.91	53.08	13.71	1	480.2	3.63	0.448	8.5	2	1	2019-12-18	1	1	0	0			- -
1209	2019-12-15 08:46	1-2	38	GnRH-antagonist	NA	primary	Ovulatory	12	IVF	0.56	7.9	3.2	31.06	24.47	1	1227	6.11	0.671	8.4	4	2	2019-12-18	2	1	0	0			- -
1210	2019-12-15 09:05	0	37	GnRH-antagonist	22.19	secondary	tubal	12	IVF	0.337	6.51	3.76	53.32	17.78	1	1676	4.49	1.32	13.7	2	2	2019-12-18	2	2	0	0			- -
1211	2019-12-15 09:30	0	31	GnRH-antagonist	18.83	primary	male	1	ICSI	0.986	5.83	6.45	46.08	15.12	1	1479	2.22	0.645	10.5	7	1	2019-12-18	1	1	0	0			- -
1212	2019-12-15 09:49	0	31	GnRH-antagonist	22.83	primary	tubal	8	IVF	1.43	10.92	4.49	61	15.01	2	2048	0.573	0.826	11.5	10	2	2019-12-18	2	2	0	0			- -
1213	2019-12-15 09:50	0	24	GnRH-antagonist	21.48	secondary	tubal	2	IVF	1.62	7.1	4.82	28.85	14	3	3252	1.1	1.08	11.6	16	2	2019-12-18	2	2	0	1	intrauterine pregnancy		2020-08-21	37	vaginal	male	3
1214	2019-12-17 08:40	1-2	32	GnRH-antagonist	22.64	primary	Unexplained	5	IVF	1.199	4.99	2	20	8.6	1	1184	4.3	0.511	11	5	1	2019-12-20	1	1	0	0			- -
1215	2019-12-18 09:45	0	30	GnRH-antagonist	27.77	primary	male	2	IVF	4.714	7.11	13.05	38.73	9.92	3	3649	12.1	0.828	13.5	10	2	2019-12-21	2	2	0	1	intrauterine pregnancy		2020-08-17	36	vaginal	male	2.25
1216	2019-12-19 09:00	≥3	45	GnRH-antagonist	19.36	secondary	Unexplained	2	IVF	1.144	13.01	5.85	28.3	19.99	1	1146	6	0.38	9.1	5	2	2019-12-22	2	1	0	0			- -
1217	2019-12-20 09:40	1-2	28	GnRH-antagonist	18.2	primary	tubal	1	IVF	4.855	6.56	5.52	39.26	10.97	3	3493	3.67	1.2	11.7	14	2	2019-12-23	2	2	0	0			- -
1218	2019-12-22 08:50	≥3	30	GnRH-antagonist	18.44	primary	tubal	3	IVF	1.129	11.7	4.04	34.15	20.18	1	640.1	3.6	0.445	9	3	3	2019-12-25	2	2	0	0			- -
1219	2019-12-23 09:46	0	26	GnRH-antagonist	20.69	secondary	tubal	1	IVF	7.89	7.42	10.3	50.84	9.16	2	2869	4.05	0.513	13.1	14	2	2019-12-26	2	2	0	0			- -
1220	2019-12-24 08:46	0	35	GnRH-antagonist	24.98	secondary	tubal	10	IVF	1.493	7.71	4.55	31.5	9.78	1	657.1	3.21	0.184	7.4	4	2	2019-12-27	2	1	0	1	intrauterine pregnancy		2020-09-12	39	Cesarean	female	3.3
1221	2019-12-26 09:40	0	24	GnRH-antagonist	20.4	primary	tubal	3	IVF	4.38	6.36	4.66	29.8	15.21	1	1477	4.46	0.556	15.7	11	2	2019-12-29	2	2	0	0			- -
1222	2019-12-28 09:50	0	28	GnRH-antagonist	29.74	primary	male	6	ICSI	2.338	6.17	7.73	39.59	10.09	1	1794	7.02	0.775	10.4	8	2	2019-12-31	2	2	0	0			- -
1223	2019-12-29 09:00	≥3	45	GnRH-antagonist	22.57	secondary	Unexplained	1	IVF	1.325	6.42	3.49	37.05	15.2	1	638.7	2.4	0.208	8	4	2	2020-01-01	2	1	0	0			- -
1224	2020-01-04 08:35	≥3	39	GnRH-antagonist	25.81	primary	tubal	13	IVF	0.366	17.93	7.68	25.25	18.76	1	857.5	9.55	0.109	9.9	2	2	2020-01-07	2	1	0	0			- -
1225	2020-01-06 09:50	0	36	GnRH-antagonist	17.01	secondary	tubal	3	IVF	1.937	5.8	3.11	42.77	18.5	1	1734	3.06	0.425	11.2	6	2	2020-01-09	1	1	0	0			- -
1226	2020-01-06 10:00	0	30	GnRH-antagonist	20.7	secondary	tubal	1	IVF	1.445	6.82	6.01	35.38	22.76	2	2014	4.81	0.496	10.2	9	2	2020-01-09	2	2	0	1	intrauterine pregnancy		2020-09-02	36	Cesarean	male	2.05	female	2.3
1227	2020-01-07 09:10	0	29	GnRH-antagonist	22.58	primary	Ovulatory	4	IVF	0.937	5.06	4.26	42.62	12.55	1	1187	0.782	0.46	10.4	8	2	2020-01-10	2	2	0	1	intrauterine pregnancy		2020-10-08	41	vaginal	female	4
1228	2020-01-09 08:40	0	39	GnRH-antagonist	24.44	secondary	tubal	1	IVF	5.589	8.08	6.51	71.8	16.73	3	3929	4.9	0.962	13.3	5	2	2020-01-12	2	2	0	1	intrauterine pregnancy	yes	- -
1229	2020-01-11 09:05	0	33	GnRH-antagonist	22.77	secondary	tubal	2	IVF	0.244	12.28	5.31	36.08	19.82	1	1759	8.42	0.539	11.8	2	2	2020-01-14	2	1	0	1	intrauterine pregnancy		2020-09-16	37	Cesarean	female	2.8
1230	2020-01-12 08:35	0	39	GnRH-antagonist	26.37	secondary	Mixed	3	IVF	2.562	7.4	4.78	55.91	12.89	1	1472	4.03	0.813	7.5	9	2	2020-01-15	2	2	0	0			- -
1231	2020-01-12 09:25	0	36	GnRH-antagonist	20.7	primary	tubal	4	IVF	3.468	6.31	3.35	43	16.76	4	4210	2.41	1.04	13.7	16	2	2020-01-15	2	2	0	1	intrauterine pregnancy		2020-09-30	39	vaginal	male	3
1232	2020-03-04 09:10	1-2	33	GnRH-antagonist	19.23	secondary	Endometriosis	4	IVF	0.794	11.06	5.48	19.78	17.98	1	883.5	3.66	0.177	14.1	2	1	2020-03-07	1	1	0	0			- -
1233	2020-03-10 10:05	0	28	GnRH-antagonist	25.59	primary	tubal	2	IVF	0.85	5.84	1.98	30.85	13.51	1	1257	3.61	0.224	10.2	11	2	2020-03-13	2	2	0	1	intrauterine pregnancy	yes	- -
1234	2020-03-11 09:05	0	39	GnRH-antagonist	25.39	secondary	tubal	1	IVF	0.625	11.09	4.36	43.44	12.98	1	946.2	2.43	0.172	12.2	6	4	2020-03-14	2	2	0	0			- -
1235	2020-03-11 09:25	1-2	26	GnRH-antagonist	20.31	secondary	tubal	4	IVF	1.456	8.72	5.37	20	14.32	1	1013	1.09	0.747	7.5	8	5	2020-03-14	2	2	0	1	intrauterine pregnancy		- -	39	Cesarean	male	3.1
1236	2020-03-11 10:02	0	37	GnRH-antagonist	22.04	secondary	tubal	5	IVF	1.215	7.06	6.18	71.64	18	2	2923	4	1.676	8.1	12	2	2020-03-14	2	2	0	0			- -
1237	2020-03-12 08:40	≥3	30	GnRH-antagonist	18.44	primary	tubal	3	IVF	1.129	11.7	4.04	34.15	19.51	1	818.8	3.29	0.428	9.9	3	2	2020-03-15	2	1	0	0			- -
1238	2020-03-13 08:53	1-2	41	GnRH-antagonist	19.56	primary	Endometriosis	1	IVF	2.812	2.71	4.76	64	18.99	1	1782	4.55	0.909	9.2	5	3	2020-03-16	2	1	0	0			- -
1239	2020-03-15 08:36	1-2	31	GnRH-antagonist	19.15	primary	Mixed	3	ICSI	0.95	7.51	2.36	59.4	17.58	1	1081	2.56	0.347	10.5	5	3	2020-03-18	2	2	0	1	intrauterine pregnancy		- -	38	Cesarean	male	3.25
1240	2020-03-16 08:45	0	34	GnRH-antagonist	21.48	secondary	tubal	8	IVF	1.626	6.6	2.36	23.37	15.92	2	2084	5.39	1.27	13.4	11	6	2020-03-19	2	1	0	0			- -
1241	2020-03-17 08:30	0	34	GnRH-antagonist	20.32	secondary	male	6	IVF	1.149	6.33	3.72	40.06	21.89	2	2885	1.45	0.827	10.8	9	2	2020-03-20	2	1	0	1	intrauterine pregnancy		- -	38	vaginal	female	3.2
1242	2020-03-17 09:25	0	42	GnRH-antagonist	24.03	secondary	Ovulatory	2	IVF	2.328	5.49	3.11	25.45	13.78	3	3301	4.68	0.993	12.6	19	2	2020-03-20	2	2	0	1	intrauterine pregnancy	yes	- -
1243	2020-03-18 08:26	1-2	31	GnRH-antagonist	25.71	secondary	tubal	3	IVF	3.06	5.74	8.7	20.45	12.91	1	1407	2.3	0.285	11	8	4	2020-03-21	2	2	0	0			- -
1244	2020-03-19 09:10	0	31	GnRH-antagonist	22.5	secondary	tubal	2	IVF	2.978	7.92	9.34	39.48	16.7	2	2630	2.16	0.814	12.1	13	2	2020-03-22	2	2	1	1	intrauterine pregnancy		- -	35	Cesarean	male	2.65	female	2.3
1245	2020-03-20 08:45	0	33	GnRH-antagonist	25.63	secondary	Mixed	9	ICSI	3.504	6.37	3.86	48.02	13.69	1	1777	4.3	0.393	14.3	6	2	2020-03-23	2	1	0	1	intrauterine pregnancy		- -	37	vaginal	male	2.75
1246	2020-03-20 08:55	1-2	27	GnRH-antagonist	21.1	secondary	tubal	0	ICSI	1.695	7.35	5.34	39.32	19.38	3	3004	1.74	0.83	9.6	13	4	2020-03-23	2	2	0	1	intrauterine pregnancy		- -	32	Cesarean	male	1.46	male	1.73
1247	2020-03-21 08:55	0	40	GnRH-antagonist	22.89	secondary	male	1	ICSI	0.709	4.36	3.71	46.97	20.56	1	1811	6.69	1.01	9.1	6	3	2020-03-24	2	2	0	1	intrauterine pregnancy	yes	- -
1248	2020-03-21 09:10	1-2	37	GnRH-antagonist	23.31	primary	tubal	2	IVF	2.67	3.55	4.02	65.45	10.31	1	1251	1.12	0.281	12.8	6	2	2020-03-24	2	1	0	0			- -
1249	2020-03-22 09:05	0	29	GnRH-antagonist	30.04	primary	male	3	ICSI	3.68	6.12	3.15	36.24	9.41	2	2675	3.28	0.626	12.4	13	2	2020-03-25	2	2	0	0			- -
1250	2020-03-22 09:50	0	28	GnRH-antagonist	27.36	secondary	tubal	3	IVF	1.433	6.63	2.86	18.81	6.52	1	1402	1.81	0.267	15.3	11	4	2020-03-25	2	2	0	1	intrauterine pregnancy		- -	39	Cesarean	female	4.5
1251	2020-03-22 10:15	1-2	42	GnRH-antagonist	20.96	secondary	male	1	ICSI	3.092	7.31	4.76	30.6	13.25	2	2603	4	0.781	9.3	14	8	2020-03-25	2	2	0	0			- -
1252	2020-03-23 08:52	0	41	GnRH-antagonist	20.51	primary	Ovulatory	1	IVF	1.38	6.36	3.6	55.21	17.3	1	1224	2.48	0.491	10.8	7	5	2020-03-26	2	1	0	0			- -
1253	2020-03-27 08:45	0	29	GnRH-antagonist	19.34	primary	Endometriosis	1	IVF	1.54	8.35	6.82	55	21.56	1	1652	7.37	0.592	11.4	7	2	2020-03-30	2	2	0	1	intrauterine pregnancy		- -	36	vaginal	female	2.85
1254	2020-03-27 09:35	0	39	GnRH-antagonist	25.64	primary	male	10	ICSI	0.796	2.48	9.32	39.5	20.61	2	2981	1.83	0.784	9	13	4	2020-03-30	2	2	0	0			- -
1255	2020-03-28 08:45	0	39	GnRH-antagonist	18.73	secondary	tubal	2	IVF	1.038	14.41	8.77	51	35.99	1	1607	2.64	0.762	8.1	4	4	2020-03-31	2	2	0	1	intrauterine pregnancy	yes	- -
1256	2020-03-28 09:05	1-2	41	GnRH-antagonist	22.38	secondary	male	1	IVF	1.445	6.23	7.36	20.38	17.99	1	1551	3.8	0.622	11.4	7	3	2020-03-31	2	2	0	1	intrauterine pregnancy		- -	35	Cesarean	male	2.4
1257	2020-03-28 09:50	0	30	GnRH-antagonist	20.31	secondary	tubal	0	IVF	NA	2.62	3.7	46.85	12.68	2	2291	3.57	0.589	8.1	6	3	2020-03-31	2	1	0	1	intrauterine pregnancy		- -	38	Cesarean	male	3.55
1258	2020-03-29 08:46	0	30	GnRH-antagonist	19.15	primary	Endometriosis	2	IVF	3.864	9.77	9.98	54.41	16.52	2	2620	2.24	1.29	13.3	8	2	2020-04-01	2	1	0	1	intrauterine pregnancy		- -	39	Cesarean	female	3.8
1259	2020-03-29 08:56	1-2	39	GnRH-antagonist	NA	secondary	male	13	ICSI	1.867	7.36	5.57	36.9	12.12	2	2353	3.09	0.118	10.8	8	3	2020-04-01	2	1	0	1	intrauterine pregnancy		- -	37	vaginal	female	3
1260	2020-03-29 09:26	1-2	31	GnRH-antagonist	19.72	secondary	Endometriosis	2	ICSI	1.03	13.34	5.11	28.17	14.18	2	2188	5.57	1.01	11.8	11	4	2020-04-01	2	1	0	1	intrauterine pregnancy		- -	32	Cesarean	male	2	male	1.35
1261	2020-03-31 09:35	1-2	36	GnRH-antagonist	18.13	secondary	tubal	1	IVF	1.54	6	5.48	41.12	28.63	1	1161	2.26	0.181	9	7	2	2020-04-03	2	2	0	1	intrauterine pregnancy		- -	39	vaginal	male	3
1262	2020-03-31 09:45	0	31	GnRH-antagonist	20.31	secondary	tubal	1	IVF	2.403	6.78	2.32	48.78	21.47	1	1580	1.07	0.509	11.8	7	2	2020-04-03	2	2	0	1	intrauterine pregnancy		- -	36	vaginal	male	2.95
1263	2020-04-01 09:00	0	35	GnRH-antagonist	18.75	secondary	tubal	3	IVF	3.61	8.45	7.17	26.05	16.92	1	996.5	2.47	0.094	8.2	5	2	2020-04-04	2	1	0	1	intrauterine pregnancy		- -	36	Cesarean	male	2.5	male	2.2
1264	2020-04-05 08:30	0	33	GnRH-antagonist	20.51	primary	Unexplained	5	IVF	3.543	4.63	5.52	53.46	10.25	1	970.1	1.68	0.266	10.5	9	2	2020-04-08	2	2	0	0			- -
1265	2020-04-07 09:10	1-2	36	GnRH-antagonist	22.6	secondary	tubal	1	IVF	0.346	10.9	6.34	46.24	25.03	1	1444	1.5	0.105	11.9	8	2	2020-04-10	2	1	0	1			- -	39	vaginal	male	3.35
1266	2020-04-10 09:10	0	26	GnRH-antagonist	27.56	secondary	Ovulatory	2	IVF	5.996	5.27	6.23	36.54	9.97	3	3432	1.55	0.489	7.3	14	1	2020-04-13	1	1	0	0			- -
1267	2020-04-11 08:45	1-2	28	GnRH-antagonist	26.67	primary	tubal	5	IVF	2.303	8.24	3.76	30.61	14.48	1	1734	6.74	0.556	10.9	11	2	2020-04-14	2	2	0	1	intrauterine pregnancy		- -	40	vaginal	male	3.5
1268	2020-04-12 08:50	0	34	GnRH-antagonist	18.82	secondary	Unexplained	3	IVF	4.95	5.42	5.6	43.33	13.44	3	3792	0.68	1.42	11	11	2	2020-04-15	2	2	0	0			- -
1269	2020-04-12 09:15	0	31	GnRH-antagonist	21.45	secondary	tubal	4	IVF	6.159	6.66	6.12	32.75	16.78	3	3748	1.95	1.04	8.8	13	1	2020-04-15	1	1	0	1	intrauterine pregnancy		- -	38	vaginal	male	3.53
1270	2020-04-13 08:50	0	44	GnRH-antagonist	21.36	secondary	tubal	1	IVF	1.65	4.9	4.6	38	20.63	1	1975	2.72	0.817	9.8	9	2	2020-04-16	2	2	0	0			- -
1271	2020-04-15 09:04	0	45	GnRH-antagonist	22.04	primary	Unexplained	10	IVF	1.799	4.38	3.07	17.85	16.56	1	1137	2.8	0.446	10.2	5	2	2020-04-18	2	1	0	0			- -
1272	2020-04-15 09:20	1-2	33	GnRH-antagonist	20.94	primary	male	1	ICSI	3.684	6.47	5.61	44.13	13.9	2	2553	4.8	0.673	13.9	11	3	2020-04-18	1	1	0	1	intrauterine pregnancy	yes	- -
1273	2020-04-17 08:45	1-2	34	GnRH-antagonist	22.67	secondary	tubal	2	IVF	0.58	4.3	4.39	47.41	19.88	1	1363	2.15	0.301	6.2	8	2	2020-04-20	2	1	0	0			- -
1274	2020-04-18 10:30	1-2	31	GnRH-antagonist	22.35	secondary	Unexplained	3	ICSI	10.896	4.75	4.07	30.17	12.97	1	1816	1.65	0.23	12	15	4	2020-04-21	2	2	0	1	intrauterine pregnancy		- -	41	Cesarean	male	3.3
1275	2020-04-19 08:55	0	25	GnRH-antagonist	NA	secondary	tubal	1	IVF	0.36	9.8	6.62	61.96	30.33	2	2907	10.03	1.22	7.9	8	2	2020-04-22	1	1	0	0			- -
1276	2020-04-19 09:30	0	22	GnRH-antagonist	23.44	primary	male	2	IVF	3.017	4.88	5.24	35.43	9.01	3	3291	2.1	1.06	12	12	6	2020-04-22	2	2	0	1	intrauterine pregnancy		- -	40	vaginal	female	3.5
1277	2020-04-20 09:10	1-2	34	GnRH-antagonist	23.44	primary	Mixed	6	IVF	0.4	6.12	4.18	34.65	22	1	959	2.24	0.387	10.9	6	2	2020-04-23	2	2	0	0			- -
1278	2020-04-20 09:22	0	31	GnRH-antagonist	19.63	secondary	tubal	4	IVF	NA	5.45	5.47	40.04	16.43	2	2109	2.22	0.927	9.7	10	2	2020-04-23	2	1	0	0			- -
1279	2020-04-20 09:46	0	28	GnRH-antagonist	18.73	primary	tubal	4	IVF	2.37	5.81	9.51	37.82	13.95	1	1663	7.44	0.859	8.4	10	2	2020-04-23	2	1	0	1	intrauterine pregnancy		- -	35	vaginal	male	2
1280	2020-04-22 08:30	0	38	GnRH-antagonist	NA	primary	male	14	ICSI	0.963	6.22	4.65	71.16	22.11	1	950.4	2.86	0.294	9.5	4	1	2020-04-25	1	1	0	1	intrauterine pregnancy			35	Cesarean	male	2.55
1281	2020-04-22 09:00	0	32	GnRH-antagonist	22.1	secondary	Ovulatory	5	IVF	0.641	5.32	5.05	24.75	11.64	1	1144	5.23	0.381	9.4	9	6	2020-04-25	2	2	0	1	intrauterine pregnancy		- -	36	Cesarean	male	2.4	female	2.7
1282	2020-04-22 09:50	0	31	GnRH-antagonist	19.89	secondary	Ovulatory	2	IVF	4.735	4.57	8.43	15.76	14.13	2	2006	1.62	0.769	9.5	15	2	2020-04-25	2	2	0	0			- -
1283	2020-04-22 10:05	0	34	GnRH-antagonist	17.93	secondary	tubal	2	IVF	2.28	7.06	7.03	58.44	15.4	2	2521	4.97	0.467	10.8	8	2	2020-04-25	2	2	1	1	intrauterine pregnancy		- -	35	Cesarean	male	2.1	male	2
1284	2020-04-22 10:20	0	39	GnRH-antagonist	20.31	secondary	Unexplained	2	IVF	2.417	6.31	5.2	26.83	18.45	3	3308	1.74	0.875	11.6	8	2	2020-04-25	2	1	0	0			- -
1285	2020-04-23 09:05	0	33	GnRH-antagonist	22.64	secondary	tubal	1	IVF	0.485	11.8	7.96	15.89	19.4	1	1695	5.16	0.536	14.3	3	2	2020-04-26	2	1	0	1	intrauterine pregnancy		- -	37	Cesarean	female	2.5
1286	2020-04-25 08:35	0	37	GnRH-antagonist	18.36	secondary	male	5	ICSI	3.11	7.36	9.72	37.06	17.45	1	1996	1.26	0.557	10.7	15	2	2020-04-28	1	1	0	1	intrauterine pregnancy		- -	39	Cesarean	male	3.9
1287	2020-04-25 08:45	0	27	GnRH-antagonist	27.89	secondary	tubal	1	IVF	1.78	1.5	3.2	37.81	12.06	3	3260	1.99	0.972	12.6	14	2	2020-04-28	2	2	0	1	intrauterine pregnancy		- -	40	vaginal	male	3.2
1288	2020-04-26 08:50	0	38	GnRH-antagonist	24.24	secondary	tubal	2	IVF	1.541	9.44	3.09	23.54	15.38	1	1062	4.15	0.467	10.8	5	4	2020-04-29	1	1	0	0			- -
1289	2020-04-26 09:10	0	26	GnRH-antagonist	24.04	secondary	tubal	2	IVF	1.81	4.2	3.5	25	12.33	2	2263	1.62	0.599	12.2	10	2	2020-04-29	2	1	0	0			- -
1290	2020-04-27 08:40	0	32	GnRH-antagonist	29.14	primary	tubal	8	IVF	1.106	6.67	3.79	13	9.59	1	918.9	3.18	0.368	8.2	2	1	2020-04-30	1	1	0	1	intrauterine pregnancy	yes	- -
1291	2020-04-28 09:10	0	37	GnRH-antagonist	24.8	secondary	tubal	1	IVF	6.472	6.54	8.04	42.96	10.43	3	3718	6.57	0.953	12.2	10	2	2020-05-01	2	2	0	1			- -
1292	2020-04-30 08:30	≥3	39	GnRH-antagonist	23.44	primary	Ovulatory	3	IVF	0.293	4.73	2.91	53.08	14.14	1	1455	5.72	0.451	10.7	3	2	2020-05-03	2	2	0	0			- -
1293	2020-04-30 08:40	0	34	GnRH-antagonist	20.19	primary	tubal	1	IVF	1.55	11.85	6.09	30.4	12.53	1	1518	2.42	0.284	12.9	7	4	2020-05-03	2	2	0	1	intrauterine pregnancy		- -	39	Cesarean	male	3.8
1294	2021-08-08 08:30:55	0	32	GnRH-antagonist	19.31	secondary	Unexplained	2	IVF	1.34	10.8	8.08	74.82	12.63	1	1551.52	3.47	0.23	11	6	3	2021-08-11 10:35:54	2	2	0	1	intrauterine pregnancy		2022-04-15	37	Cesarean	male	3.5
1295	2021-08-08 08:45:28	1-2	39	GnRH-antagonist	21.09	secondary	tubal	10	IVF	3.08	5.31	2.46	33	22.79	1	1233.57	2.95	0.63	13.5	7	5	2021-08-11 11:30:06	2	2	0	1	intrauterine pregnancy		2022-04-25	39	vaginal	male	3.45
1296	2021-08-09 09:10:53	0	43	GnRH-antagonist	22.31	secondary	tubal	3	IVF	1.88	7.93	3.58	21.78	17.88	1	1100.93	2.31	0.32	8	5	5	2021-08-12 10:30:41	2	2	0	0
1297	2021-08-10 09:30:02	0	32	GnRH-antagonist	18.82	primary	male	3	IVF	2.87	7.42	4.45	69.06	12.9	1	976.5	0.68	0.2	8.7	7	4	2021-08-13 11:55:11	2	1	0	1	intrauterine pregnancy		2022-04-15	37	Cesarean	male	3.2
1298	2021-08-10 09:35:59	1-2	35	GnRH-antagonist	23.6	primary	male	1	ICSI	1.51	6.23	2.09	33.76	20.88	1	1846	1.78	0.9	10.1	12	6	2021-08-13 10:53:15	2	2	0	1	intrauterine pregnancy		2022-04-08	36	Cesarean	male	2.65	male	2.16
1299	2021-08-10 10:06:10	1-2	38	GnRH-antagonist	27.34	primary	Ovulatory	6	ICSI	7.338	5.37	6.69	26.34	11.43	3	3281.3	3.19	0.52	10.9	12	6	2021-08-13 10:45:23	2	2	0	1	intrauterine pregnancy		2022-04-27	39	vaginal	male	3.25
1300	2021-08-12 08:45:41	1-2	45	GnRH-antagonist	22.67	primary	tubal	2	IVF	1.51	10.02	4.63	28.78	20.15	1	908.89	6.5	0.49	9	2	1	2021-08-15 11:55:54	1	1	0	0
1301	2021-08-15 09:00:07	0	34	GnRH-antagonist	20.5	secondary	DOR	2	IVF	0.38	10.94	7.34	60	20.43	1	1151.9	2.11	0.28	9.6	3	3	2021-08-18 11:45:36	1	1	0	0
1302	2021-08-15 09:50:41	0	25	GnRH-antagonist	18.9	primary	tubal	2	IVF	17.25	5.84	3.24	48.99	11.3	2	2708.7	2.6	0.35	9.2	9	8	2021-08-18 11:25:22	1	1	0	1	intrauterine pregnancy		2022-04-12	36	Cesarean	male	2.7
1303	2021-08-17 09:20:18	0	40	GnRH-antagonist	23.44	secondary	Unexplained	2	IVF	3.43	5.51	2.25	26.34	10.66	2	2861	2.99	0.66	11.9	17	5	2021-08-20 10:40:50	2	2	0	0
1304	2021-08-18 09:45:27	0	29	GnRH-antagonist	17.77	secondary	tubal	1	IVF	3.09	7.09	2.97	29	10.85	2	2932	1.09	0.48	9.8	11	6	2021-08-21 11:10:46	2	2	1	1	intrauterine pregnancy		2022-04-28	38	vaginal	female	2.5
1305	2021-08-19 08:55:37	0	28	GnRH-antagonist	27.68	primary	tubal	1	IVF	4.43	4.58	8.4	49.64	8.06	3	3809.75	3.14	0.4	9.3	16	11	2021-08-22 10:50:00	1	1	0	1	intrauterine pregnancy	yes
1306	2021-08-21 08:40:07	0	34	GnRH-antagonist	19.22	primary	male	1	ICSI	1.47	6.53	1.85	33.67	21.22	1	1411.88	2.92	1	10.2	8	2	2021-08-24 10:40:52	1	1	0	0
1307	2021-08-21 09:20:04	0	31	GnRH-antagonist	23.23	primary	male	5	ICSI	2.31	5.87	1.64	12.41	14.58	1	1073.17	3.95	0.42	9.4	11	6	2021-08-24 11:03:27	2	2	0	0
1308	2021-08-23 08:40:35	0	27	GnRH-antagonist	26.04	secondary	tubal	2	IVF	1.32	5.59	1.21	36.67	15.35	1	751.61	2.07	0.35	10	10	7	2021-08-26 10:35:06	1	1	0	1	intrauterine pregnancy		2022-05-05	38	Cesarean	male	3.4
1309	2021-08-24 09:15:33	0	39	GnRH-antagonist	23.59	secondary	Unexplained	1	IVF	2.58	13.67	8.51	46.04	19.52	2	2659.1	2.33	0.87	10.2	11	5	2021-08-27 10:10:46	2	2	0	1	intrauterine pregnancy	yes
1310	2021-08-27 09:05:23	0	26	GnRH-antagonist	22.89	secondary	tubal	2	ICSI	7.67	7.87	5.87	20.79	11.45	1	1139.64	2.56	0.26	10.9	11	4	2021-08-30 11:15:52	2	2	1	1	intrauterine pregnancy		2022-03-31	32	Cesarean	female	1.7	female	1.8
1311	2021-08-29 08:35:44	0	38	GnRH-antagonist	21.75	primary	tubal	5	IVF	4.82	6.94	2.47	36.7	15.08	1	1966.2	2.3	0.17	10.7	9	4	2021-09-01 11:10:30	1	1	0	1	intrauterine pregnancy	yes
1312	2021-08-31 08:50:54	0	34	GnRH-antagonist	20.96	secondary	Mixed	1	ICSI	1.22	6.81	2.48	51.52	16.98	1	929.1	1.67	0.21	9.4	6	5	2021-09-03 10:40:33	2	2	0	0
1313	2021-09-01 08:40:04	0	33	GnRH-antagonist	16.44	secondary	tubal	1	IVF	1.49	8.6	6.36	38.7	14.46	2	2136	1.79	0.5	10	6	3	2021-09-04 11:25:15	1	1	0	1	intrauterine pregnancy		2022-05-21	39	Cesarean	male	3.08
1314	2021-09-01 09:25:08	0	32	GnRH-antagonist	16.42	primary	Unexplained	3	IVF	1.2	9.76	7.84	37.6	15.3	1	1590	1.38	0.59	12	11	4	2021-09-04 11:15:40	1	1	0	0
1315	2021-09-04 08:40:15	0	32	GnRH-antagonist	26.57	primary	tubal	5	IVF	2.86	6.74	2.6	34.33	10.48	1	753.81	2.07	0.27	12.9	5	4	2021-09-07 10:40:30	2	2	0	1	intrauterine pregnancy		2022-04-10	33	Cesarean	male	2.2	female	1.75
1316	2021-09-05 08:48:53	1-2	34	GnRH-antagonist	19.83	secondary	tubal	1	IVF	0.901	8.96	7.58	55.31	23.27	1	1626.52	3.73	0.41	7.1	5	5	2021-09-08 11:00:42	1	1	0	0
1317	2021-09-05 09:05:43	0	41	GnRH-antagonist	25.24	secondary	Unexplained	1	IVF	2.1	7.86	2.49	40.01	9.9	1	1107	4.5	0.35	10.5	5	5	2021-09-08 10:35:39	2	1	0	0
1318	2021-09-05 09:50:07	0	36	GnRH-antagonist	26.04	primary	tubal	1	IVF	0.97	7.4	7.54	28.22	15.66	3	3140.28	1.89	0.3	9.7	10	4	2021-09-08 11:25:27	2	2	0	0
1319	2021-09-06 09:10:55	0	31	GnRH-antagonist	19.14	secondary	tubal	2	IVF	3.75	6.24	7.58	29.5	12.95	3	3347.96	1.75	0.54	9.5	15	7	2021-09-09 10:00:23	2	2	0	0
1320	2021-09-07 08:55:53	0	28	GnRH-antagonist	19.05	primary	Mixed	2	IVF	8.2	6.85	2.93	18.91	15.13	1	1780.18	0.18	0.68	10.1	9	8	2021-09-10 11:10:08	1	1	1	0
1321	2021-09-08 08:50:45	≥3	41	GnRH-antagonist	16.02	secondary	Mixed	1	ICSI	1.74	7.62	6.25	57.55	37.23	1	1525.85	3.06	0.53	7.3	7	3	2021-09-11 12:24:38	1	1	0	0
1322	2021-09-08 09:50:47	0	34	GnRH-antagonist	21.48	primary	Unexplained	3	IVF	4.05	7.41	9.84	64.59	17.51	3	3595	1.35	0.67	NA	12	10	2021-09-11 12:00:56	1	1	0	1	intrauterine pregnancy		2022-05-28	39	vaginal	female	2.8
1323	2021-09-08 10:15:45	0	29	GnRH-antagonist	17.19	primary	Unexplained	2	IVF	1.34	6.81	17.42	71.87	18.35	1	1078.55	4.74	0.31	9.3	3	2	2021-09-11 11:15:09	1	1	0	0
1324	2021-09-10 09:00:45	1-2	40	GnRH-antagonist	19.83	primary	tubal	2	ICSI	2.93	7.72	4.07	62.15	15.45	2	2099.28	1.73	0.38	13.1	8	5	2021-09-13 11:15:43	2	2	0	1	intrauterine pregnancy	yes
1325	2021-09-11 09:30:47	0	31	GnRH-antagonist	28.25	primary	male	3	ICSI	15.496	4.8	7.23	30.34	8.16	2	2172.72	1.02	0.26	14.1	11	3	2021-09-14 11:35:47	2	1	0	0
1326	2021-09-12 08:45:52	0	43	GnRH-antagonist	23.73	secondary	tubal	3	IVF	1.72	8.2	2.07	13.63	11.6	1	894.35	2.26	0.27	8	5	3	2021-09-15 11:10:02	1	1	0	1	intrauterine pregnancy		2022-05-26	38	Cesarean	female	2.8
1327	2021-09-14 09:40:53	0	30	GnRH-antagonist	25.39	primary	tubal	1	IVF	2.91	7.63	3.45	32.87	19.13	1	1970	2.8	0.46	9.5	11	6	2021-09-17 11:15:51	2	2	0	1
1328	2021-09-14 10:05:05	1-2	38	GnRH-antagonist	21.63	secondary	tubal	4	IVF	1.4	4.21	2.22	18.13	17.79	1	1693.88	1.7	0.59	15.3	11	7	2021-09-17 11:05:39	2	2	0	1	intrauterine pregnancy	yes
1329	2021-09-15 08:40:25	1-2	31	GnRH-antagonist	17.54	primary	Unexplained	3	IVF	3.37	7.77	2.89	78.54	23.36	2	2242.88	2.48	0.38	12.1	6	4	2021-09-18 10:20:54	1	1	0	1	intrauterine pregnancy		2022-05-27	38	Cesarean	male	2.5
1330	2021-09-16 08:40:23	0	39	GnRH-antagonist	23.93	secondary	Mixed	6	IVF	0.71	9.68	4.41	43.01	11.52	1	1132.87	3.49	0.19	8.9	2	2	2021-09-19 11:00:52	2	2	0	0
1331	2021-09-19 08:50:49	1-2	29	GnRH-antagonist	16.8	secondary	tubal	1	IVF	2.294	8.65	6.35	37.74	19.98	2	2337.86	2.4	0.75	7.9	14	3	2021-09-22 11:15:26	1	1	0	1	intrauterine pregnancy		2022-06-07	39	Cesarean	male	3.35
1332	2021-09-20 09:20:59	0	42	GnRH-antagonist	27.11	secondary	tubal	7	IVF	1	5.89	1.33	38.85	18.64	1	1200	1.88	0.53	10.1	5	3	2021-09-23 11:00:42	2	2	0	0
1333	2021-09-20 09:40:37	0	34	GnRH-antagonist	20.69	secondary	male	9	IVF	1.95	6.38	4.22	17.66	16.72	1	1828.34	1.32	0.55	11.1	8	3	2021-09-23 10:40:54	2	2	0	1	intrauterine pregnancy	yes
1334	2021-09-25 08:55:19	0	37	GnRH-antagonist	21.09	secondary	male	3	IVF	3.18	5.45	2.29	18.72	26.61	1	1008.72	1.19	0.36	10.6	6	3	2021-09-28 10:15:56	2	1	0	1	intrauterine pregnancy			38	vaginal	male	2.9
1335	2021-09-28 08:40:33	0	25	GnRH-antagonist	22.43	secondary	tubal	2	IVF	6.62	6.96	2.54	23.21	11.91	3	3040.38	1.46	0.51	10	18	8	2021-10-01 09:30:49	2	2	0	1	intrauterine pregnancy			39	vaginal	female	3.33
1336	2021-09-28 09:10:19	0	30	GnRH-antagonist	20.03	primary	Mixed	3	IVF	4.68	6.11	6.47	35.49	11.61	3	3740.21	2.03	0.94	12.5	16	8	2021-10-01 10:25:23	2	2	0	1	intrauterine pregnancy			37	Cesarean	male	2.9	female	2.23
1337	2015-10-05 00:00	0	30	GnRH-agonist long protocol	23.73	secondary	Mixed	1	IVF	NA	6.51	2.48	56.95	9.05	4	4300	1.45	1.38	13	23	6	2015-10-08	2	2	0	1	intrauterine pregnancy		2016-06-12	37	Cesarean	female	2.5	female	3.1
1338	2015-10-10 09:30	0	34	GnRH-agonist long protocol	20.89	secondary	Mixed	1	IVF	NA	5.56	2.95	45.35	17.47	3	3273	0.992	0.781	11.4	12	8	2015-10-13	2	2	1	1	intrauterine pregnancy		2016-07-01	38	vaginal			female	2.85
1339	2015-10-10 09:50	0	36	GnRH-agonist long protocol	18.8	secondary	Mixed	2	IVF	NA	7.59	7.48	45.45	15.19	4	4350	0.856	0.46	NA	18	13	2015-10-13	2	1	0	1	intrauterine pregnancy		2016-06-18	37	vaginal	male	3.1
1340	2015-10-28 09:20	0	30	GnRH-agonist long protocol	22.1	secondary	tubal	1	IVF	NA	8.78	5.35	33.78	11.57	1	1874	2.07	0.482	15	12	9	2015-10-31	2	2	0	1	intrauterine pregnancy		2016-07-01	37	Cesarean	male	3.18	male	2.8
1341	2015-10-31 09:40	0	27	GnRH-agonist long protocol	20.06	secondary	Ovulatory	1	IVF	NA	6.75	7.08	30.44	0.718	1	1862	0.816	NA	15.5	8	7	2015-11-03	2	2	1	1	intrauterine pregnancy		2016-06-27	35	Cesarean	male	2.45	male	2.35
1342	2015-11-01 09:16	0	33	GnRH-agonist long protocol	18.52	secondary	Mixed	3	IVF	NA	8.87	7.17	45.63	9.38	3	3560	2.47	1.38	14	8	5	2015-11-04	2	2	0	1	intrauterine pregnancy		2016-07-08	37	Cesarean	male	3.1	male	2.7
1343	2015-11-02 09:35	0	30	GnRH-agonist long protocol	22.06	primary	male	2	IVF	NA	6.89	4.32	26.64	9.68	2	2605	1.85	1.07	11	13	11	2015-11-05	2	2	0	0			- -
1344	2015-11-03 10:10	0	28	GnRH-agonist long protocol	18.83	primary	male	2	IVF	NA	6.24	6.32	48.31	11.67	1	1766	1.98	0.486	13	6	4	2015-11-06	2	2	0	0			- -
1345	2015-11-05 09:40	1-2	37	GnRH-agonist long protocol	20.81	secondary	male	6	IVF	NA	3.01	4.47	36	12.98	3	3688	1.42	0.47	13	11	6	2015-11-08	2	2	0	0			- -
1346	2015-11-07 09:15	0	30	GnRH-agonist long protocol	20.83	primary	Mixed	2	IVF	NA	7.36	0.64	42.96	10.6	4	4040	0.41	0.657	8	20	4	2015-11-10	2	2	0	0			- -
1347	2015-11-09 10:00	0	25	GnRH-agonist long protocol	19.53	primary	male	3	IVF	NA	8.26	3.64	45.89	12.8	2	2657	2.05	0.77	12.9	12	5	2015-11-12	2	2	0	1	intrauterine pregnancy		2016-07-23	38	vaginal	male	3.1
1348	2015-11-10 09:15	1-2	34	GnRH-agonist long protocol	23.42	secondary	tubal	6	IVF	NA	8.06	5.93	28.03	14.46	2	2399	0.857	0.947	11.8	8	2	2015-11-13	2	1	0	0			- -
1349	2015-11-11 10:30	1-2	40	GnRH-agonist long protocol	21.09	secondary	Ovulatory	8	IVF	NA	7.46	3.72	49.76	13.75	3	3728	1.05	0.854	11	9	6	2015-11-14	2	2	0	1	intrauterine pregnancy	yes	- -
1350	2015-11-11 10:40	0	34	GnRH-agonist long protocol	22.94	primary	tubal	4	IVF	NA	5.94	8.93	25.3	9.03	2	2848	1.78	0.595	10.5	13	7	2015-11-14	2	2	0	1	heterotopic pregnancy	yes	- -
1351	2015-11-16 10:10	0	32	GnRH-agonist long protocol	21.64	primary	tubal	4	IVF	NA	5.39	3	37.89	9.53	3	3177	0.604	0.639	15.1	14	10	2015-11-19	2	2	0	1	intrauterine pregnancy		2016-08-04	39	Cesarean	male	3.5
1352	2015-11-16 10:30	0	30	GnRH-agonist long protocol	23.14	secondary	tubal	1	IVF	NA	6.26	3.55	39	10.25	1	1759	2.76	0.697	13	6	2	2015-11-19	2	1	0	0			- -
1353	2015-11-16 10:50	0	32	GnRH-agonist long protocol	22.43	primary	tubal	3	IVF	NA	5.68	4.8	38.04	6.23	3	3553	1.15	0.44	9.8	11	5	2015-11-19	2	2	0	0			- -
1354	2015-11-16 11:05	0	30	GnRH-agonist long protocol	22.58	primary	Mixed	2	ICSI	NA	5.67	1.16	31.94	10.96	4	4500	0.649	1.15	10.4	8	5	2015-11-19	2	2	0	0			- -
1355	2015-11-17 09:35	0	34	GnRH-agonist long protocol	20.03	secondary	tubal	2	IVF	NA	6.93	4	17.58	9.48	2	2115	1.05	1.19	9.2	7	2	2015-11-20	2	2	0	1	intrauterine pregnancy	yes	- -
1356	2015-11-17 10:25	1-2	27	GnRH-agonist long protocol	22.6	primary	tubal	6	IVF	NA	7.86	3.85	38.99	11.88	1	1969	1.56	0.642	12.2	3	2	2015-11-20	2	2	0	0			- -
1357	2015-11-17 10:45	0	28	GnRH-agonist long protocol	20.2	secondary	Mixed	3	IVF	NA	6.14	4.62	50.48	7.39	2	2283	2.44	0.635	11.7	7	5	2015-11-20	2	2	0	1	intrauterine pregnancy		2016-07-19	37	Cesarean	male	2.55	female	2.58
1358	2015-11-20 09:10	1-2	26	GnRH-agonist long protocol	21.38	primary	tubal	4	ICSI	NA	6.15	4.54	23.48	9.48	4	4320	1.82	1.47	12.9	19	11	2015-11-23	2	2	0	1	intrauterine pregnancy		2016-07-18	36	Cesarean	male	2.15	female	2.2
1359	2015-11-20 09:35	1-2	32	GnRH-agonist long protocol	30.49	primary	tubal	9	IVF	NA	5.36	2.35	41.22	6.15	2	2647	1.25	1.34	10.3	14	9	2015-11-23	2	2	0	1	intrauterine pregnancy		2016-07-20	36	Cesarean	female	2.6	female	2.5
1360	2015-11-20 09:45	1-2	33	GnRH-agonist long protocol	21.48	secondary	tubal	1	IVF	NA	6.42	3.86	47.39	12.08	3	3834	1.84	1.07	9.5	9	6	2015-11-23	2	2	0	0			- -
1361	2015-11-20 11:30	1-2	32	GnRH-agonist long protocol	17.22	secondary	male	5	ICSI	NA	6.05	2.08	30.28	13.66	1	1631	1.55	0.86	9.3	3	3	2015-11-23	1	1	0	1	intrauterine pregnancy		2016-07-29	37	Cesarean	male	3
1362	2015-11-22 09:50	1-2	41	GnRH-agonist long protocol	22.83	secondary	tubal	5	IVF	NA	5.8	2.83	57.67	18.14	1	1038	3.74	0.623	12	5	3	2015-11-25	2	3	0	0			- -
1363	2015-11-23 09:15	0	34	GnRH-agonist long protocol	22.22	primary	tubal	8	IVF	NA	7.79	5.83	37.84	11.16	4	4364	0.686	1.22	13	18	7	2015-11-26	2	2	0	0			- -
1364	2015-11-23 09:45	≥3	31	GnRH-agonist long protocol	24.41	primary	Unexplained	8	ICSI	NA	5.53	4.39	40.91	8.61	1	1828	1.09	0.919	8.5	11	10	2015-11-26	2	2	0	0			- -
1365	2015-11-24 09:20	0	38	GnRH-agonist long protocol	20.31	primary	tubal	2	IVF	NA	6	3.1	34.9	13.34	3	3119	1.81	1.17	13.6	8	6	2015-11-27	2	2	0	1	intrauterine pregnancy		2016-08-13	39	vaginal	male	3.15
1366	2015-11-24 10:55	0	30	GnRH-agonist long protocol	21.23	primary	male	7	IVF	NA	6.42	3.59	36.4	15.97	2	2255	0.495	0.574	15.5	15	4	2015-11-27	2	1	0	0			- -
1367	2015-11-25 09:20	0	37	GnRH-agonist long protocol	18.16	secondary	tubal	13	IVF	NA	7.77	0.39	41.44	9.66	3	3796	0.541	1.07	10.6	18	12	2015-11-28	2	2	0	1	ectopic pregnancy		- -
1368	2015-11-25 09:43	0	29	GnRH-agonist long protocol	19.96	secondary	tubal	4	IVF	NA	4.86	3.14	43.89	12.92	3	3235	2.02	1.02	13	19	11	2015-11-28	2	2	0	0			- -
1369	2015-11-27 09:13	0	23	GnRH-agonist long protocol	27.34	primary	tubal	3	IVF	NA	5.55	3.82	39.64	6.12	4	4367	1.05	0.563	14	18	13	2015-11-30	2	2	0	1	intrauterine pregnancy		2016-07-14	35	Cesarean	male	2.2	male	2.3
1370	2015-11-27 09:43	1-2	38	GnRH-agonist long protocol	20.31	secondary	tubal	7	IVF	NA	7.53	5.85	42.89	18.68	2	2277	1.29	0.817	12	9	3	2015-11-30	2	2	0	0			- -
1371	2015-11-30 09:20	1-2	38	GnRH-agonist long protocol	20.76	secondary	Endometriosis	6	IVF	NA	4.68	6.58	58.44	15.65	2	2716	1.23	1.27	13	10	6	2015-12-03	2	2	0	1	intrauterine pregnancy		2016-08-15	39	vaginal	male	3.5
1372	2015-11-30 09:35	0	43	GnRH-agonist long protocol	20	secondary	male	1	IVF	NA	4.7	2.68	33.7	16.99	4	4068	0.968	1.37	9.3	22	9	2015-11-03	2	2	0	0			- -
1373	2015-12-05 10:55	0	34	GnRH-agonist long protocol	21.69	secondary	Mixed	11	IVF	NA	5.23	2.68	31	14.85	1	1918	0.717	0.838	10	9	5	2015-12-08	2	2	0	0			- -
1374	2015-12-10 09:40	0	30	GnRH-agonist long protocol	21.77	primary	tubal	10	IVF	NA	6	6.59	35.53	9.28	4	4500	1.55	0.842	11.9	24	7	2015-12-13	2	2	0	1	intrauterine pregnancy		2016-07-21	34	Cesarean	male	1.99	male	1.99
1375	2015-12-10 10:10	0	33	GnRH-agonist long protocol	20.31	primary	male	8	IVF	NA	5.82	2.33	65.38	13.91	3	3541	1.19	0.677	9.6	16	12	2015-12-13	2	1	0	1	intrauterine pregnancy	yes	- -
1376	2015-12-11 09:10	0	41	GnRH-agonist long protocol	24.3	primary	Ovulatory	1	IVF	NA	2.66	6.06	19	11.53	1	802.8	1.15	1.41	9.9	4	3	2015-12-14	2	2	0	1	intrauterine pregnancy		2016-08-26	39	Cesarean			female	3.4
1377	2015-12-11 09:25	0	32	GnRH-agonist long protocol	24.61	secondary	Mixed	1	IVF	NA	5.71	2.24	22.41	7.26	2	2118	0.38	0.721	13	9	4	2015-12-14	2	1	0	0			- -
1378	2015-12-11 09:45	0	23	GnRH-agonist long protocol	24	primary	tubal	2	IVF	NA	7.74	8.58	27.38	12.96	2	2385	1.26	1.07	14.7	11	9	2015-12-14	2	2	0	1	intrauterine pregnancy		2016-08-12	36	Cesarean	female	2.5	female	2
1379	2015-12-12 08:45	0	27	GnRH-agonist long protocol	23.44	primary	male	4	ICSI	NA	6.33	4.07	11.7	6.66	1	1558	0.889	0.383	12.9	5	3	2015-12-15	2	1	0	1	intrauterine pregnancy		2016-08-30	40	Cesarean			female	3.8
1380	2015-12-12 09:13	1-2	40	GnRH-agonist long protocol	19.4	secondary	tubal	10	IVF	NA	8.81	2.43	39.18	12.56	4	4124	1.72	1.38	11	16	8	2015-12-15	2	2	0	0			- -
1381	2015-12-12 09:30	0	25	GnRH-agonist long protocol	17.85	primary	male	3	IVF	NA	6.7	4.25	38.8	9.72	3	3354	1.72	1.45	11.3	14	6	2015-12-15	2	2	0	0			- -
1382	2015-12-12 09:50	0	26	GnRH-agonist long protocol	18.99	primary	male	0	ICSI	NA	5.48	3.63	28.01	8.39	3	3945	1.06	1.11	11.7	19	14	2015-12-15	2	1	0	0			- -
1383	2015-12-12 10:05	0	37	GnRH-agonist long protocol	18.36	secondary	tubal	1	IVF	NA	6.78	4.73	54.1	10.69	2	2842	0.803	1.29	9	16	6	2015-12-15	2	2	0	0			- -
1384	2015-12-12 10:30	0	30	GnRH-agonist long protocol	20.13	primary	Mixed	6	IVF	NA	5.45	5.26	37.71	8.1	4	4310	2.36	0.954	12.6	19	10	2015-12-15	2	2	0	1	intrauterine pregnancy		2016-08-22	38	vaginal			female	3.15
1385	2015-12-14 09:30	0	25	GnRH-agonist long protocol	21.23	secondary	tubal	7	IVF	NA	6.09	3.24	47.96	11.79	2	2584	0.623	1.64	10.1	19	5	2015-12-17	2	1	0	1	intrauterine pregnancy		2016-09-09	40	Cesarean	male	3.45
1386	2015-12-15 09:10	0	28	GnRH-agonist long protocol	19.92	primary	Ovulatory	1	IVF	NA	8.32	2.33	61.59	23.82	1	636	0.433	0.207	8.2	2	2	2015-12-18	2	2	0	1	intrauterine pregnancy		2016-08-31	39	vaginal	male	3.6
1387	2015-12-15 09:15	1-2	35	GnRH-agonist long protocol	16.87	secondary	Mixed	7	IVF	NA	7.99	3.92	52.38	16.68	4	4311	2.93	0.603	11.7	10	6	2015-12-18	2	2	0	0			- -
1388	2015-12-15 09:35	1-2	29	GnRH-agonist long protocol	19.53	secondary	tubal	2	IVF	NA	1.97	0.64	5	12.6	2	2930	1.67	0.768	14.4	9	6	2015-12-18	2	2	0	1	intrauterine pregnancy		2016-08-07	36	Cesarean	male	2.5	female	2.3
1389	2015-12-16 09:15	0	32	GnRH-agonist long protocol	19.53	primary	Mixed	3	IVF	NA	7.69	1.09	62.7	17.3	2	2199	0.84	0.747	16	9	5	2015-12-19	2	1	0	0			- -
1390	2015-12-16 09:35	0	30	GnRH-agonist long protocol	22.46	secondary	Mixed	10	IVF	NA	8.69	1.33	11.27	14.19	3	3557	0.857	0.879	NA	15	7	2015-12-19	2	2	0	1	intrauterine pregnancy		2016-08-14	37	Cesarean	male	2.8	female	2.3
1391	2015-12-18 09:28	0	36	GnRH-agonist long protocol	19.82	secondary	tubal	2	IVF	NA	4.49	6.77	55.66	23.74	3	3630	1.4	1.3	11.8	17	8	2015-12-21	2	1	0	1	intrauterine pregnancy		2016-08-19	37	Cesarean	male	2.55	male	2.3
1392	2015-12-18 10:30	0	33	GnRH-agonist long protocol	28.81	secondary	Unexplained	2	IVF	NA	8.2	4.81	51	14.62	3	3402	1.14	0.932	10.7	12	9	2015-12-15	2	2	0	1	intrauterine pregnancy		2016-08-25	37	vaginal			female	2.75
1393	2015-12-19 10:15	0	33	GnRH-agonist long protocol	22.83	secondary	tubal	1	IVF	NA	8.01	3.41	42.59	20.24	1	1297	2.27	0.821	8	3	1	2015-12-22	1	1	0	0			- -
1394	2015-12-21 09:20	0	31	GnRH-agonist long protocol	18.43	secondary	Endometriosis	2	IVF	NA	6.54	4.54	14.51	8.96	1	1813	2.96	0.22	13.9	4	2	2015-12-24	2	1	0	1	intrauterine pregnancy		2016-08-26	37	Cesarean	female	2.7	female	2.9
1395	2015-12-21 09:35	1-2	40	GnRH-agonist long protocol	18.26	primary	tubal	10	IVF	NA	2.2	7.11	50.15	16.41	2	2785	1.68	0.545	12	10	8	2015-12-24	2	2	0	1	intrauterine pregnancy		2016-09-08	39	Cesarean			female	3
1396	2015-12-22 10:23	1-2	39	GnRH-agonist long protocol	22.68	secondary	tubal	4	ICSI	NA	8.09	6.08	49.3	12.23	3	3136	1.91	0.494	9	15	11	2015-12-25	2	1	0	1	intrauterine pregnancy	yes	- -
1397	2015-12-22 10:55	1-2	36	GnRH-agonist long protocol	23.44	secondary	tubal	1	IVF	NA	7.05	3.92	35.05	13.56	1	1591	2.2	0.651	15.9	5	5	2015-12-25	2	2	0	0			- -
1398	2015-12-23 08:54	0	43	GnRH-agonist long protocol	25.39	secondary	Mixed	1	IVF	NA	1.92	1.7	16.84	12.22	1	669.1	1.3	0.172	12.9	3	2	2015-12-26	2	2	0	0			- -
1399	2015-12-24 09:00	0	34	GnRH-agonist long protocol	20.45	primary	male	2	IVF	NA	6.67	6.98	21.68	9.15	4	4323	1.98	0.673	NA	14	11	2015-12-27	2	2	0	0			- -
1400	2015-12-25 09:15	0	26	GnRH-agonist long protocol	22.03	primary	male	3	ICSI	NA	5.49	3.72	24.41	14.44	3	3272	1.44	1.4	13.2	6	2	2015-12-28	2	2	0	1	intrauterine pregnancy		2016-08-28	37	Cesarean	female	2.5	female	2.6
1401	2015-12-28 10:15	0	44	GnRH-agonist long protocol	24.46	secondary	tubal	5	IVF	NA	5.59	4.76	28.03	10.11	1	1459	2.61	0.862	15	7	3	2015-12-31	2	2	0	0			- -
1402	2015-12-31 09:55	0	39	GnRH-agonist long protocol	25.39	secondary	tubal	6	IVF	NA	8.24	3.18	34.79	15.84	1	1780	1.69	0.707	12.3	4	2	2016-01-03	2	2	0	1	intrauterine pregnancy		2016-09-16	39	vaginal	male	3.15
1403	2016-01-03 09:30	0	37	GnRH-agonist long protocol	20.58	secondary	Mixed	1	IVF	NA	4.25	5.51	54.97	17.3	1	1516	1.58	1.05	12.6	13	7	2016-01-06	2	2	0	1	intrauterine pregnancy		2016-09-16	38	Cesarean	male	3.61
1404	2016-01-04 09:50	0	36	GnRH-agonist long protocol	23.15	primary	Mixed	4	IVF	NA	6.44	2.06	29.88	11.42	2	2645	0.896	1.18	13.4	21	12	2016-01-07	2	2	0	1	intrauterine pregnancy		2016-09-04	37	Cesarean	male	2.25	male	2.5
1405	2016-01-04 10:20	0	31	GnRH-agonist long protocol	20.32	secondary	tubal	2	IVF	NA	5.68	3.47	21.46	11.43	2	2746	2.47	0.694	13.8	11	6	2016-01-07	2	2	0	1	intrauterine pregnancy		2016-09-19	38	vaginal			female	3.4
1406	2016-01-05 09:20	0	31	GnRH-agonist long protocol	20.31	primary	male	5	IVF	NA	7.03	4.4	21.56	9.44	2	2783	2.81	0.873	11.3	12	9	2016-01-08	2	2	0	0			- -
1407	2016-01-06 09:20	0	27	GnRH-agonist long protocol	19.72	primary	tubal	5	IVF	NA	9.37	1.86	20.46	18.4	3	3043	1.68	1.25	12.9	14	7	2016-01-09	2	2	0	1	intrauterine pregnancy		2016-08-31	36	Cesarean	male	2.25	female	1.9
1408	2016-01-08 09:50	0	27	GnRH-agonist long protocol	21.1	primary	tubal	1	IVF	2.1	3.1	5.77	38.69	10.55	2	2090	3.47	0.786	14.6	5	2	2016-01-11	2	1	0	1	intrauterine pregnancy		2016-09-28	39	Cesarean			female	4
1409	2016-01-09 10:20	0	22	GnRH-agonist long protocol	27.29	primary	male	1	ICSI	NA	3.69	1.48	17.76	8.7	4	4620	1.62	1.14	10	18	12	2016-01-12	2	2	0	1	intrauterine pregnancy		2016-09-25	40	Cesarean	male	3.04
1410	2016-01-11 09:23	≥3	39	GnRH-agonist long protocol	19.2	primary	tubal	11	IVF	NA	9.07	5.26	10.23	14.83	1	697.2	1.89	1.11	8.6	2	1	2016-01-14	1	1	0	0			- -
1411	2016-01-12 09:45	0	30	GnRH-agonist long protocol	19.72	secondary	tubal	2	IVF	NA	5.82	3.7	29.85	9.74	3	3084	1.12	0.689	10	17	7	2016-01-15	2	2	0	1	intrauterine pregnancy		2016-09-09	36	Cesarean	female	1.8	female	2.35
1412	2016-01-13 09:20	0	23	GnRH-agonist long protocol	22.21	secondary	tubal	3	IVF	NA	9.29	6.67	39	16.37	3	3720	2.41	0.808	10	12	9	2016-01-16	2	2	0	1	intrauterine pregnancy		2016-09-24	39	vaginal			female	2.9
1413	2016-01-13 10:00	0	34	GnRH-agonist long protocol	26.35	primary	male	1	IVF	NA	7.02	2.2	18.49	9.65	2	2067	0.988	0.66	15	13	8	2016-01-16	2	2	0	1	intrauterine pregnancy		2016-10-08	40	Cesarean	male	3.04
1414	2016-01-15 09:50	0	29	GnRH-agonist long protocol	19.57	primary	male	3	ICSI	NA	7.45	5.04	20	16.19	3	3508	1.4	1.46	11.2	8	2	2016-01-18	2	2	0	1	intrauterine pregnancy	yes	- -
1415	2016-01-16 09:25	0	34	GnRH-agonist long protocol	25.39	secondary	Mixed	1	IVF	NA	7.82	1.99	23.17	12.01	2	2080	2.1	0.75	12	13	2	2016-01-19	2	1	0	1	intrauterine pregnancy		2016-09-28	38	Cesarean			female	3.5
1416	2016-01-19 09:43	0	38	GnRH-agonist long protocol	25.16	secondary	tubal	2	IVF	NA	9.06	6.49	7.51	9.82	1	1658	1.8	0.393	13.6	9	2	2016-01-22	2	1	0	1	intrauterine pregnancy		2016-09-20	36	Cesarean	male	2.7
1417	2016-01-22 09:30	0	36	GnRH-agonist long protocol	20.51	secondary	tubal	6	IVF	NA	8.02	3.7	45.36	8.56	1	1838	1.89	0.609	13.4	11	2	2016-01-25	2	2	0	0			- -
1418	2016-03-12 09:46	1-2	30	GnRH-agonist long protocol	23.14	secondary	tubal	1	IVF	NA	6.26	3.55	31.06	10.87	1	1894	3.04	0.694	11.8	10	4	2016-03-15	2	2	0	1	intrauterine pregnancy		2016-11-19	38	vaginal	male	3.81
1419	2016-03-12 10:05	0	39	GnRH-agonist long protocol	18.2	secondary	tubal	10	IVF	NA	6.55	5.3	56.48	17.06	3	3149	1.31	0.439	10	10	7	2015-03-15	2	2	0	0			- -
1420	2016-03-13 09:10	0	35	GnRH-agonist long protocol	20.7	primary	Ovulatory	2	IVF	NA	5.63	8.63	32.78	15.13	4	4302	1.47	1.25	13	14	7	2016-03-16	2	2	0	0			- -
1421	2016-03-14 10:30	1-2	32	GnRH-agonist long protocol	21.09	primary	Mixed	6	IVF	NA	9.27	2.57	40.08	10.19	4	4246	1.96	0.898	14	16	4	2016-03-17	2	2	0	0			- -
1422	2016-03-15 09:30	0	23	GnRH-agonist long protocol	19.91	primary	male	5	ICSI	NA	5.73	6.48	39.91	12.68	4	4193	2.14	0.932	7.6	10	6	2016-03-18	2	2	0	1	intrauterine pregnancy		2016-11-23	38	Cesarean	female	2.45	female	2.35
1423	2016-03-18 09:20	0	32	GnRH-agonist long protocol	16.65	primary	Mixed	5	IVF	NA	5.35	5.41	36.63	11.94	1	1254	0.402	1.02	8.8	10	4	2016-03-21	2	2	0	1	heterotopic pregnancy		2016-10-22	32	vaginal	male	1.8
1424	2016-03-20 09:30	0	42	GnRH-agonist long protocol	23.34	secondary	Mixed	1	IVF	NA	5.73	3.84	22	13.11	2	2426	1.96	0.64	8.9	8	3	2016-03-23	2	1	0	1	intrauterine pregnancy		2016-12-01	38	Cesarean			female	3.25
1425	2016-03-25 09:10	0	28	GnRH-agonist long protocol	20.03	secondary	tubal	1	IVF	NA	4.99	4.26	9.87	10.65	4	4528	3.21	1.15	10.4	15	9	2016-03-28	2	2	0	0			- -
1426	2016-03-25 09:40	0	29	GnRH-agonist long protocol	17.9	primary	male	2	IVF	NA	4.44	4.73	41.12	14.98	3	3212	2.54	0.918	14	12	6	2016-03-28	2	2	0	1	intrauterine pregnancy		2016-11-29	38	Cesarean	male	2.55
1427	2016-03-29 09:30	1-2	34	GnRH-agonist long protocol	18.56	secondary	Mixed	11	IVF	NA	3.2	7.61	67.99	11.74	1	1663	3.98	0.836	7.1	2	2	2016-04-01	2	2	0	0			- -
1428	2016-03-29 09:45	0	37	GnRH-agonist long protocol	21.1	primary	tubal	2	IVF	NA	5.76	7.26	31.63	23.25	2	2639	1.62	0.558	11	15	6	2016-04-01	2	2	0	0			- -
1429	2016-03-30 09:15	1-2	35	GnRH-agonist long protocol	20.81	secondary	tubal	4	IVF	NA	7.12	4.48	26.45	13.71	2	2614	1.68	0.416	12	11	6	2016-04-02	2	1	0	0			- -
1430	2016-03-30 09:35	0	35	GnRH-agonist long protocol	23.44	primary	male	3	IVF	NA	6.09	2.43	40.67	11.68	3	3980	2.24	0.901	13	19	4	2016-04-02	2	2	0	1	intrauterine pregnancy		2016-12-17	39	Cesarean			female	3.3
1431	2016-03-31 09:05	0	31	GnRH-agonist long protocol	24.14	secondary	tubal	1	IVF	NA	5.89	5.77	22	13.15	2	2435	3.41	0.685	8.8	6	4	2016-04-03	2	2	0	1	heterotopic pregnancy		2016-12-14	38	Cesarean	male	3.65
1432	2016-04-02 09:30	0	31	GnRH-agonist long protocol	17.58	secondary	tubal	3	IVF	NA	6.9	3.6	23.39	16.79	3	3688	1.57	0.838	13.9	16	4	2016-04-05	2	2	0	0			- -
1433	2016-04-05 09:30	0	27	GnRH-agonist long protocol	14.86	primary	tubal	4	IVF	NA	7.27	4.91	5	12.97	1	1923	5.52	0.217	10	12	4	2016-04-07	2	2	0	1	intrauterine pregnancy	yes	- -
1434	2016-04-09 08:50	0	30	GnRH-agonist long protocol	18.73	primary	Mixed	3	IVF	NA	5.94	3.27	5	12.05	4	4902	2.4	0.834	10.6	19	5	2016-04-12	2	2	0	0			- -
1435	2016-04-10 09:50	1-2	32	GnRH-agonist long protocol	19.78	secondary	male	2	ICSI	NA	5.08	4.42	20.57	9.79	3	3167	2.4	0.811	9.2	13	4	2016-04-13	2	2	0	1	intrauterine pregnancy		2016-12-30	39	vaginal	male	3.9
1436	2016-04-12 09:05	0	27	GnRH-agonist long protocol	19.03	primary	male	3	ICSI	NA	6.93	5.54	28.07	14.44	2	2745	1.56	0.7	13.5	8	4	2016-04-15	2	2	0	0			- -
1437	2016-04-16 09:45	≥3	42	GnRH-agonist long protocol	23.73	secondary	male	2	IVF	NA	3.45	1.48	24.09	13.65	1	889.4	1.96	1.05	10.8	3	2	2016-04-19	2	1	0	0			- -
1438	2016-04-18 09:50	0	29	GnRH-agonist long protocol	26.44	secondary	tubal	2	IVF	NA	5.39	2.24	38.29	8.94	4	4325	1.59	1.19	8.9	20	7	2016-04-21	2	1	0	0			- -
1439	2016-04-19 09:37	0	32	GnRH-agonist long protocol	16.02	primary	tubal	3	IVF	NA	6.85	2.88	64	16.61	2	2978	1.92	0.674	14.3	14	6	2016-04-22	2	2	0	1	intrauterine pregnancy		2016-12-24	37	vaginal	male	2.55
1440	2016-04-19 10:30	0	40	GnRH-agonist long protocol	20.57	secondary	tubal	4	IVF	NA	6.52	2.4	23	15.27	2	2674	2.54	0.946	10.5	15	6	2016-04-22	2	2	0	1	intrauterine pregnancy	yes	- -
1441	2016-04-21 09:25	0	28	GnRH-agonist long protocol	17.34	primary	Mixed	2	IVF	NA	6.04	6.53	49.42	12.48	4	4664	4.82	1.18	12.5	9	5	2016-04-24	2	2	0	0			- -
1442	2016-04-22 09:45	1-2	35	GnRH-agonist long protocol	23.03	secondary	male	2	ICSI	NA	5.58	3.89	32.99	31.56	3	3249	2.2	0.365	13	15	6	2016-04-25	2	2	0	1	intrauterine pregnancy	yes	- -
1443	2016-04-22 10:30	1-2	39	GnRH-agonist long protocol	25.22	secondary	male	7	IVF	NA	7.13	3.47	17.11	21.47	2	2989	1.53	0.913	11	12	6	2016-04-25	2	1	0	1	intrauterine pregnancy		2017-01-02	38	Cesarean	male	4
1444	2016-04-25 09:50	1-2	35	GnRH-agonist long protocol	22.89	secondary	male	4	ICSI	NA	3.61	6.71	12.8	14.97	2	2766	2.68	0.716	13.7	16	6	2016-04-28	2	1	0	1	intrauterine pregnancy		2017-01-09	38	Cesarean			female	3.6
1445	2016-04-26 09:25	0	33	GnRH-agonist long protocol	28.26	secondary	tubal	8	IVF	NA	5.14	4.62	22.5	10.54	3	3760	2.19	0.819	12	22	10	2016-04-29	2	2	0	1	intrauterine pregnancy		2017-01-05	38	Cesarean	male	3
1446	2016-04-30 09:15	0	37	GnRH-agonist long protocol	19.72	secondary	tubal	1	IVF	NA	15.81	5.9	11.2	15.54	1	705.4	2.64	0.522	7.9	5	2	2016-05-03	2	2	0	1	intrauterine pregnancy		2017-01-18	39	Cesarean			female	3.1
1447	2016-05-03 09:05	0	24	GnRH-agonist long protocol	21.23	primary	Mixed	1	IVF	NA	8.28	2.87	62.01	9.37	2	2626	2.17	1.08	8.8	3	4	2016-05-06	2	2	0	0			- -
1448	2016-05-04 09:00	0	31	GnRH-agonist long protocol	22.04	secondary	tubal	2	IVF	NA	6.12	6.45	18.7	11.2	2	2570	2.75	0.75	10	16	4	2016-05-07	2	2	0	1	intrauterine pregnancy		2017-01-21	39	vaginal			female	3
1449	2016-05-04 10:00	0	26	GnRH-agonist long protocol	19.56	secondary	Mixed	1	IVF	NA	5.89	4.37	35.49	12.56	4	4524	2.75	0.961	9	10	4	2016-05-07	2	2	0	0			- -
1450	2016-05-06 09:00	1-2	38	GnRH-agonist long protocol	17.09	secondary	male	6	ICSI	NA	8.78	6.89	20.4	19.41	2	2452	1.84	0.63	14.9	12	6	2016-05-09	2	1	0	1	intrauterine pregnancy		2017-01-17	38	Cesarean			female	2.65
1451	2016-05-12 09:35	0	32	GnRH-agonist long protocol	19.72	secondary	tubal	3	IVF	NA	6.97	5	37.9	17.28	1	1623	2.14	0.774	11.8	10	4	2016-05-15	2	2	0	1	ectopic pregnancy		- -
1452	2016-05-12 10:15	0	28	GnRH-agonist long protocol	18.75	secondary	tubal	1	IVF	NA	9.18	7.13	36.73	22.17	1	1230	1.47	0.909	10	11	4	2016-05-15	2	2	0	1	intrauterine pregnancy		2016-12-03	32	vaginal	male	1.7	female	1.6
1453	2016-05-13 09:40	0	28	GnRH-agonist long protocol	18.26	primary	male	5	ICSI	NA	7.89	4.88	18.56	30.37	2	3000	1.82	1.51	10	16	6	2016-05-16	2	2	0	0			- -
1454	2016-05-13 09:55	1-2	35	GnRH-agonist long protocol	21.3	secondary	tubal	0	IVF	NA	9.03	5.52	5	17.44	2	2270	0.12	0.596	9.6	22	6	2016-05-16	2	2	0	1	intrauterine pregnancy		2016-12-14	32	Cesarean	male	1.8	female	1.7
1455	2016-05-15 10:05	1-2	39	GnRH-agonist long protocol	24.46	secondary	male	2	ICSI	NA	7.69	2.44	13.92	11.4	1	1453	1.23	0.572	13.3	8	4	2016-05-18	2	2	0	0			- -
1456	2016-05-21 09:30	0	28	GnRH-agonist long protocol	21.75	primary	tubal	4	IVF	NA	8.1	7.17	39.39	6.34	4	4220	2.99	1.02	9.7	8	2	2016-05-24	2	1	0	0			- -
1457	2016-05-21 09:50	0	25	GnRH-agonist long protocol	18.51	primary	male	3	ICSI	NA	9.76	6.36	50.93	20.45	1	1544	3.38	0.871	9.5	6	3	2016-05-24	2	2	0	1	intrauterine pregnancy		2016-12-09	31	Cesarean	male	1.6	male	1.7
1458	2016-05-21 10:30	1-2	35	GnRH-agonist long protocol	22.89	secondary	tubal	6	IVF	NA	6.5	3.99	28.93	15.02	1	1926	1.82	0.877	11	10	2	2016-05-24	2	2	0	1	intrauterine pregnancy		2017-01-29	38	Cesarean			female	3.2
1459	2016-05-24 09:25	0	28	GnRH-agonist long protocol	21.51	primary	Mixed	1	ICSI	NA	5.92	2.5	42.6	11.42	2	2505	2.49	1.18	15	7	5	2016-05-27	2	1	0	1	intrauterine pregnancy		2017-01-21	36	Cesarean	male	2.45	male	2.3
1460	2016-05-24 10:00	0	41	GnRH-agonist long protocol	22.48	secondary	male	7	IVF	NA	9.69	6.24	51.6	14.6	2	2630	1.28	0.532	14	7	2	2016-05-27	2	2	0	0			- -
1461	2016-05-26 09:05	1-2	35	GnRH-agonist long protocol	19.03	secondary	male	6	IVF	NA	4.44	8.24	29.59	17.86	3	3834	2.5	0.356	12.2	10	4	2016-05-29	2	2	0	1	intrauterine pregnancy		2017-02-06	38	Cesarean	male	3.3
1462	2016-05-26 09:30	0	32	GnRH-agonist long protocol	20.03	primary	Endometriosis	3	IVF	NA	8.7	5.67	20.63	15.84	2	2902	1.19	0.8	14.9	10	2	2016-05-29	2	2	0	1	intrauterine pregnancy		2017-02-18	40	Cesarean	male	3.5
1463	2016-05-27 08:50	1-2	42	GnRH-agonist long protocol	26.44	secondary	tubal	4	IVF	NA	4.37	1.08	25.1	17.97	1	1188	1.86	0.441	9.7	8	4	2016-05-30	2	1	0	0			- -
1464	2016-05-28 09:10	0	32	GnRH-agonist long protocol	22.58	primary	tubal	4	IVF	NA	9.91	4.53	44.63	20.27	1	723.7	0.826	0.732	13.5	3	2	2016-05-31	2	1	0	1	intrauterine pregnancy		2017-02-06	38	Cesarean	male	3.7
1465	2016-05-30 08:50	0	29	GnRH-agonist long protocol	20.76	primary	male	4	ICSI	NA	6.86	4.52	27.2	11.87	1	545.3	0.12	0.773	9	10	4	2016-06-02	2	2	0	1	intrauterine pregnancy		2017-02-07	38	Cesarean	female	2.5	female	2.5
1466	2016-05-30 09:05	≥3	43	GnRH-agonist long protocol	24.22	secondary	tubal	8	IVF	NA	9.12	3.77	58.87	15	1	430.1	1.48	0.494	10.7	3	2	2016-06-02	2	1	0	0			- -
1467	2016-05-30 09:20	0	28	GnRH-agonist long protocol	21.43	primary	male	3	ICSI	NA	6.68	6.59	39.1	20.95	2	2122	2.22	1.03	9.9	10	2	2016-06-02	2	1	0	1	intrauterine pregnancy		2017-02-13	39	vaginal	male	3.15
1468	2016-05-30 09:42	0	30	GnRH-agonist long protocol	23.44	secondary	male	1	ICSI	NA	5.56	3.69	70.75	18.22	1	1366	1.29	0.753	8	13	5	2016-06-02	2	2	0	1	intrauterine pregnancy		2017-02-14	39	vaginal			female	3
1469	2016-05-31 09:25	0	34	GnRH-agonist long protocol	18.49	primary	male	6	IVF	NA	5.61	2.29	25.73	32.58	1	1178	1.15	0.314	13.5	8	2	2016-06-03	2	1	0	1	intrauterine pregnancy		2017-02-16	38	Cesarean			female	2.7
1470	2016-05-31 09:30	0	32	GnRH-agonist long protocol	NA	primary	tubal	4	IVF	NA	5.93	4.27	45.28	14.08	2	3000	1.6	1.09	13	16	6	2016-06-03	2	2	0	0			- -
1471	2016-06-05 09:40	0	34	GnRH-agonist long protocol	23.73	primary	male	4	ICSI	NA	8.81	3.44	5	14.33	2	2881	2.03	0.706	14.7	22	6	2016-06-08	2	1	0	1	intrauterine pregnancy		2017-02-25	39	Cesarean	male	3	male	3.05
1472	2016-06-05 10:05	0	33	GnRH-agonist long protocol	19.88	primary	Endometriosis	2	IVF	NA	8.85	5.79	48.22	13.37	1	1388	1.1	0.614	10.8	2	2	2016-06-08	2	2	0	1	intrauterine pregnancy		2017-02-06	37	Cesarean	female	2.75	female	2.65
1473	2016-06-07 09:15	1-2	32	GnRH-agonist long protocol	25.36	primary	male	3	ICSI	NA	7.71	3.85	21.32	28.48	2	2259	1.9	0.576	11.7	7	2	2016-06-10	2	2	0	1	intrauterine pregnancy		2017-03-01	39	Cesarean			female	3.05
1474	2016-06-07 09:32	0	29	GnRH-agonist long protocol	16.85	primary	Mixed	2	IVF	NA	7.52	5.24	21	17.85	2	2271	1.31	1.14	9.1	9	2	2016-06-10	2	2	0	1	intrauterine pregnancy		2017-02-10	37	Cesarean	male	1.95	female	3.1
1475	2016-06-07 09:50	0	38	GnRH-agonist long protocol	26.71	secondary	tubal	2	IVF	NA	6.65	3.25	42.31	15.13	2	2992	0.889	0.887	9.4	23	2	2016-06-10	2	2	0	1	intrauterine pregnancy		2017-03-04	40	vaginal			female	3.15
1476	2016-06-08 09:00	0	32	GnRH-agonist long protocol	17.26	secondary	Mixed	3	IVF	NA	7.82	3.35	42.01	9.55	2	2542	2.66	0.753	14.9	9	2	2016-06-11	2	2	0	1	intrauterine pregnancy		2017-02-04	36	vaginal	male	2.05
1477	2016-06-11 09:25	1-2	32	GnRH-agonist long protocol	19.53	primary	Mixed	3	ICSI	NA	7.69	0.64	62.7	24.82	3	3496	0.298	0.76	14.8	18	8	2016-06-14	2	2	0	0			- -
1478	2016-06-11 10:10	1-2	39	GnRH-agonist long protocol	23.03	secondary	tubal	1	IVF	NA	4.95	2.61	8.2	12.39	1	1746	1.71	0.569	9	12	2	2016-06-14	2	2	0	1	intrauterine pregnancy	yes	- -
1479	2016-06-12 09:00	0	28	GnRH-agonist long protocol	19.38	primary	tubal	3	IVF	NA	4.15	5.56	60.12	9.85	3	3010	1.51	0.843	8.1	16	4	2016-06-15	2	2	0	0			- -
1480	2016-06-12 09:20	0	36	GnRH-agonist long protocol	24.61	secondary	tubal	11	IVF	NA	7	6.05	52.47	10.51	4	4282	2.63	0.686	12.3	10	2	2016-06-15	2	2	0	1	intrauterine pregnancy		2017-02-27	39	Cesarean	male	3.1
1481	2016-06-13 08:40	0	40	GnRH-agonist long protocol	22.77	secondary	tubal	1	IVF	NA	6.16	5.09	36.1	15.08	1	425.5	2.08	0.534	11.8	3	3	2016-06-16	2	2	0	1	intrauterine pregnancy		2017-03-02	39	Cesarean			female	3.9
1482	2016-06-13 09:14	0	41	GnRH-agonist long protocol	27.06	secondary	tubal	6	IVF	NA	9.16	8.26	30.69	22.39	2	2733	0.726	0.826	8.9	15	4	2016-06-16	2	2	0	0			- -
1483	2016-06-14 09:55	0	41	GnRH-agonist long protocol	18.5	secondary	Mixed	1	IVF	NA	3.06	4.17	20	26.43	1	1995	1.48	0.499	11	9	8	2016-06-17	2	2	0	0			- -
1484	2016-06-14 10:35	1-2	29	GnRH-agonist long protocol	24.22	secondary	Mixed	3	ICSI	NA	6.1	2.75	22.92	10.51	4	4728	0.383	0.833	6	18	4	2016-06-17	2	2	0	0			- -
1485	2016-06-16 09:30	0	29	GnRH-agonist long protocol	29.69	primary	tubal	4	IVF	NA	7.72	3.49	7.4	7.81	1	1267	0.611	0.697	10.1	10	2	2016-06-19	2	2	0	0			- -
1486	2016-06-18 09:00	0	35	GnRH-agonist long protocol	18.51	primary	Mixed	1	ICSI	NA	4.4	3.8	68.65	11.86	3	3516	2.08	0.693	14.7	16	4	2016-06-21	2	2	0	1	intrauterine pregnancy		2017-03-06	39	vaginal			female	3.15
1487	2016-06-19 09:10	0	31	GnRH-agonist long protocol	20.51	secondary	tubal	1	IVF	NA	6.5	2.16	66.01	13.57	2	2653	2.37	1.04	8.7	14	6	2016-06-22	2	2	0	0			- -
1488	2016-06-25 09:10	0	40	GnRH-agonist long protocol	20.43	secondary	tubal	3	IVF	NA	4.26	7.74	39.83	13.89	3	3790	1.29	0.702	10	13	6	2016-06-28	2	2	0	1	intrauterine pregnancy		2017-03-02	39	Cesarean			female	2.7
1489	2016-06-26 09:20	0	35	GnRH-agonist long protocol	26.93	secondary	Mixed	1	IVF	NA	5	1.93	29.91	9.81	3	3726	2.2	0.673	8	10	2	2016-06-29	2	1	0	0			- -
1490	2016-06-27 09:00	0	40	GnRH-agonist long protocol	22.27	secondary	Mixed	1	IVF	NA	3.66	4.57	53	14	2	2939	1.34	0.73	11	16	6	2016-06-30	2	2	0	1	intrauterine pregnancy		2017-03-18	36	Cesarean	male	2.3	female	2.7
1491	2016-06-27 09:25	0	42	GnRH-agonist long protocol	23.03	secondary	tubal	2	IVF	NA	8.41	3.38	59.31	15.55	1	1547	1.16	0.503	11.2	6	6	2016-06-30	2	2	0	0			- -
1492	2016-06-27 09:40	0	36	GnRH-agonist long protocol	22.43	secondary	tubal	1	IVF	NA	7.1	2.58	15.8	26.02	3	3170	8.11	0.766	11	9	6	2016-06-30	2	1	0	1	intrauterine pregnancy		2017-03-19	36	Cesarean	male	2.8
1493	2016-06-28 09:15	0	38	GnRH-agonist long protocol	24.14	secondary	Mixed	2	IVF	NA	7.79	3.27	38.6	4.37	1	1946	4.23	0.787	12.9	10	4	2016-07-01	2	1	0	1	intrauterine pregnancy	yes	- -
1494	2016-06-30 09:30	0	29	GnRH-agonist long protocol	22.6	primary	male	3	IVF	NA	6.15	3.63	49.19	14.47	3	3032	3.57	1.11	14.1	17	6	2016-07-03	2	2	0	1	intrauterine pregnancy		2017-03-20	39	vaginal			female	3
1495	2016-07-01 08:45	0	24	GnRH-agonist long protocol	21.1	secondary	tubal	1	IVF	NA	8.01	8.21	51	11.83	3	3166	0.944	0.733	11.9	14	4	2016-07-04	2	2	0	1	intrauterine pregnancy		2017-03-01	37	Cesarean	female	2.25	female	2.35
1496	2016-07-02 09:00	0	38	GnRH-agonist long protocol	18.97	secondary	tubal	2	IVF	NA	1.55	5.15	5.93	24.82	3	3302	1.71	1.11	12.7	9	4	2016-07-05	2	2	0	1	intrauterine pregnancy	yes	- -
1497	2016-07-04 09:05	0	35	GnRH-agonist long protocol	21.48	secondary	tubal	1	IVF	NA	5.47	6.41	19.2	11.3	4	4208	2.32	0.263	8.3	12	4	2016-07-07	2	2	0	0			- -
1498	2016-07-04 09:22	0	33	GnRH-agonist long protocol	20.32	secondary	Endometriosis	2	IVF	NA	5.99	4.99	41.33	12.09	3	3992	3.14	0.671	10	15	6	2016-07-07	2	2	0	0			- -
1499	2016-07-04 10:05	0	24	GnRH-agonist long protocol	18.36	secondary	Mixed	2	IVF	NA	6.28	2.83	44.84	15.74	3	3568	2.68	0.884	12.7	11	3	2016-07-07	2	2	0	1	ectopic pregnancy		- -
1500	2016-07-05 09:50	0	27	GnRH-agonist long protocol	20.93	secondary	male	3	IVF	NA	5.79	7.47	18.33	8.68	2	2822	2.97	0.674	9.7	18	4	2016-07-08	2	2	0	0			- -
1501	2016-07-07 09:50	0	29	GnRH-agonist long protocol	17.04	primary	tubal	1	IVF	NA	4.99	2.31	63	13.2	1	1518	1.84	1.02	17.8	6	2	2016-07-10	2	2	0	1	intrauterine pregnancy		2017-03-21	38	vaginal	male	3
1502	2016-07-08 09:15	0	30	GnRH-agonist long protocol	24.67	primary	male	3	IVF	NA	4.54	3.9	41.84	16.11	2	2559	2.62	0.826	12	13	2	2016-07-11	2	2	0	1	intrauterine pregnancy		2017-03-31	40	vaginal	male	3.2
1503	2016-07-14 08:55	0	29	GnRH-agonist long protocol	20.43	secondary	tubal	3	IVF	NA	6.65	8.47	27	13.4	2	2435	1.42	0.985	13	21	2	2016-07-17	2	2	0	1	intrauterine pregnancy		2017-03-13	36	Cesarean	male	3	male	1.9
1504	2016-07-14 09:50	0	33	GnRH-agonist long protocol	33.78	primary	male	12	ICSI	NA	8.9	3.54	37.82	12	3	3006	2.48	0.812	15	12	3	2016-07-17	2	2	0	1	intrauterine pregnancy		2017-03-08	35	Cesarean	male	2.65
1505	2016-07-15 08:50	0	30	GnRH-agonist long protocol	29.11	secondary	tubal	7	IVF	NA	7.49	8.47	27.91	13.54	1	516	0.1	0.63	10.1	7	2	2016-07-18	2	2	0	1	intrauterine pregnancy		2017-03-01	34	Cesarean			female	1.65
1506	2016-07-17 09:35	0	34	GnRH-agonist long protocol	23.38	primary	male	6	IVF	NA	5.35	4.39	30.33	13.5	2	2695	2.05	1.28	NA	18	4	2016-07-20	2	2	0	1	intrauterine pregnancy		2017-04-01	39	Cesarean	male	4.15
1507	2016-07-19 10:15	0	43	GnRH-agonist long protocol	21.37	primary	Mixed	1	IVF	NA	8.94	3.38	52.65	14.58	1	1565	2.08	0.065	10.2	7	4	2016-07-22	2	2	0	0			- -
1508	2016-07-20 09:10	0	32	GnRH-agonist long protocol	22.94	secondary	tubal	10	IVF	NA	1.54	2.75	57	12.88	4	4162	2.06	0.947	12.3	18	4	2016-07-20	2	2	0	1	intrauterine pregnancy		2017-04-01	39	Cesarean	male	4
1509	2016-07-22 09:20	0	36	GnRH-agonist long protocol	21.88	secondary	tubal	2	IVF	NA	6.71	6.35	41.81	12.01	1	1726	2.69	0.487	7.4	9	7	2016-07-25	2	2	0	1	intrauterine pregnancy		2017-04-17	40	vaginal	male	3.2
1510	2016-07-24 09:30	≥3	42	GnRH-agonist long protocol	19.07	secondary	tubal	6	IVF	NA	7.86	6.17	50.58	13.15	4	4008	2.62	0.841	8.9	12	4	2016-07-27	2	2	0	0			- -
1511	2016-07-25 09:02	0	29	GnRH-agonist long protocol	22.03	primary	Endometriosis	1	IVF	NA	6.81	3.27	28.96	12.68	3	3092	0.13	0.987	10.5	22	4	2016-07-28	2	2	1	0			- -
1512	2016-07-25 09:47	1-2	41	GnRH-agonist long protocol	24.09	secondary	Mixed	2	IVF	NA	8.23	6.67	28.3	11.03	2	2625	4	0.845	10.3	11	8	2016-07-28	2	2	0	1	intrauterine pregnancy	yes	- -
1513	2016-07-25 10:00	0	37	GnRH-agonist long protocol	20.7	secondary	tubal	8	IVF	NA	8.12	5.31	27.59	17.06	1	1590	1.68	0.691	11	9	5	2016-07-28	2	2	0	1	intrauterine pregnancy		2017-03-16	40	vaginal			female	4.1
1514	2016-07-31 09:25	0	45	GnRH-agonist long protocol	19.53	secondary	Mixed	10	IVF	NA	9.42	2.7	33.36	18.84	1	1623	1.39	0.381	8.7	7	3	2016-08-03	2	1	0	0			- -
1515	2016-07-31 09:40	0	36	GnRH-agonist long protocol	19.92	secondary	tubal	5	IVF	NA	6.44	5.31	51.09	14.03	3	3626	1.46	0.19	12.8	12	4	2016-08-03	2	1	0	1	intrauterine pregnancy		2017-04-08	38	Cesarean	male	3.1	male	2.9
1516	2016-08-03 09:55	0	27	GnRH-agonist long protocol	17.01	secondary	tubal	0	IVF	NA	5.34	3.38	31.33	17.71	1	1927	2.94	0.887	11.6	6	2	2016-08-06	2	2	0	1	intrauterine pregnancy		2017-04-24	39	vaginal			female	3.2
1517	2016-08-03 10:10	1-2	34	GnRH-agonist long protocol	16.8	primary	male	9	IVF	NA	8.98	6.93	33.68	25.74	3	3346	2.03	0.573	14.1	7	2	2016-08-06	2	2	0	1	intrauterine pregnancy	yes	- -
1518	2016-08-05 08:45	0	32	GnRH-agonist long protocol	22.64	primary	male	6	IVF	NA	5.5	3.88	18.07	18.74	3	3828	1.97	0.6	13.7	9	2	2016-08-08	2	2	0	1	intrauterine pregnancy		2017-04-12	38	Cesarean	male	2.7	female	2.4
1519	2016-08-05 09:05	0	23	GnRH-agonist long protocol	23.44	primary	Mixed	3	ICSI	NA	6.4	2.73	54.83	11.89	1	1705	0.81	0.202	8.2	14	2	2016-08-08	2	2	0	1	intrauterine pregnancy		2017-04-17	38	vaginal			female	3
1520	2016-08-14 09:45	0	31	GnRH-agonist long protocol	18.55	secondary	tubal	1	IVF	NA	4.99	5.326	40	22.92	2	2251	1.27	0.912	13.9	14	2	2016-08-17	2	1	0	1	heterotopic pregnancy	yes	- -
1521	2016-08-15 09:55	0	24	GnRH-agonist long protocol	24.79	primary	Ovulatory	1	IVF	NA	6.99	1.94	48.2	8.55	2	2899	2.36	0.701	11	11	2	2016-08-18	2	2	0	1	intrauterine pregnancy		2017-04-12	36	Cesarean	female	2.5	female	2.25
1522	2016-08-16 09:00	0	29	GnRH-agonist long protocol	20.5	primary	Mixed	4	IVF	NA	6.45	2.52	52.37	11.8	2	2638	2.49	1.23	14.3	11	3	2016-08-19	2	2	0	1	intrauterine pregnancy		2017-05-05	38	Cesarean	male	2.3	female	3.1
1523	2016-08-17 09:10	1-2	37	GnRH-agonist long protocol	20.4	secondary	tubal	7	IVF	NA	7.66	3.07	31.92	13.54	1	1044	0.1	0.468	NA	7	4	2016-08-20	2	2	0	0			- -
1524	2016-08-20 09:55	0	35	GnRH-agonist long protocol	27.01	primary	Endometriosis	1	IVF	NA	7.51	3.57	45.15	11.82	2	2161	3.21	0.705	8	12	2	2016-08-23	2	2	0	0			- -
1525	2016-08-20 10:15	0	37	GnRH-agonist long protocol	21.36	primary	male	3	ICSI	NA	5.88	1.88	18.25	21.97	1	1792	3.49	0.565	13.7	5	3	2016-08-23	2	1	0	0			- -
1526	2016-08-21 09:15	0	29	GnRH-agonist long protocol	24.03	secondary	tubal	4	IVF	NA	6.82	3.24	19.5	13.5	2	2625	1.05	1.03	14	14	2	2016-08-24	2	2	0	0			- -
1527	2016-08-22 09:15	0	44	GnRH-agonist long protocol	22.04	secondary	tubal	1	IVF	NA	6.08	1.76	47	15.38	1	665.2	2.09	0.467	10.4	5	2	2016-08-25	2	2	0	0			- -
1528	2016-08-23 09:20	0	31	GnRH-agonist long protocol	20.7	primary	Unexplained	3	IVF	NA	6.47	4.97	36.24	22.14	1	1073	1.99	0.416	8.6	4	4	2016-08-26	2	2	0	0			- -
1529	2016-08-23 09:55	1-2	36	GnRH-agonist long protocol	18.9	secondary	tubal	3	IVF	NA	1.67	6.71	5	14.47	1	466.4	0.706	0.26	8	2	1	2016-08-26	1	1	0	0			- -
1530	2016-08-24 09:15	0	36	GnRH-agonist long protocol	19.72	primary	tubal	10	IVF	NA	8.45	4.97	63.96	22.67	3	3262	1.33	0.481	10.8	12	2	2016-08-27	2	2	0	0			- -
1531	2016-08-26 09:40	0	35	GnRH-agonist long protocol	22.21	primary	male	2	IVF	NA	7.77	5.45	29.02	12.16	3	3065	1.75	0.448	13.3	18	4	2016-08-29	2	2	0	1	intrauterine pregnancy		2017-05-01	38	Cesarean	male	3.25
1532	2016-08-29 09:50	0	34	GnRH-agonist long protocol	26.77	secondary	tubal	6	IVF	NA	3.98	5.96	15.61	11.27	2	2827	1.37	0.585	8.7	5	4	2016-09-01	2	2	0	0			- -
1533	2016-08-29 10:05	0	36	GnRH-agonist long protocol	23.03	secondary	male	3	IVF	NA	5.63	4.86	11.24	10.29	2	2558	1.66	0.7	12.5	9	4	2016-09-01	2	2	0	0			- -
1534	2016-09-11 09:05	0	29	GnRH-agonist long protocol	22.38	primary	tubal	3	IVF	NA	7.05	4.09	41	20.21	3	3694	1.59	0.833	17.1	6	2	2016-09-14	2	1	0	0			- -
1535	2016-09-11 09:30	0	28	GnRH-agonist long protocol	19.23	secondary	tubal	1	IVF	NA	3.51	0.78	54.97	8.24	1	1675	6.39	0.507	10	12	4	2016-09-14	2	2	0	0			- -
1536	2016-09-13 09:20	0	32	GnRH-agonist long protocol	23.12	primary	male	3	ICSI	NA	9.07	8.32	23	NA	4	4366	1.54	0.43	13.9	17	6	2016-09-16	2	2	0	0			- -
1537	2016-09-18 09:45	0	37	GnRH-agonist long protocol	19.53	secondary	tubal	7	IVF	NA	6.94	3.95	6.59	20.93	3	3928	1.23	0.899	11	14	4	2016-09-21	2	2	0	0			- -
1538	2016-09-18 10:10	1-2	31	GnRH-agonist long protocol	19.65	secondary	tubal	4	IVF	NA	5.63	3.07	37	13.46	1	1682	3.32	0.361	14.7	7	2	2016-09-21	2	2	0	1	intrauterine pregnancy		2017-06-07	40	vaginal			female	2.8
1539	2016-09-19 10:05	0	30	GnRH-agonist long protocol	19.22	primary	Mixed	5	IVF	NA	6.11	6.5	26.1	13.72	4	4258	1.15	0.708	12	18	4	2016-09-22	2	1	0	0			- -
1540	2016-09-20 09:50	1-2	32	GnRH-agonist long protocol	20.03	secondary	male	2	ICSI	NA	6.81	7.43	31.47	26.34	1	1833	3.07	0.55	15	7	2	2016-09-23	2	2	0	1	intrauterine pregnancy		2017-06-13	40	vaginal			female	3.5
1541	2016-09-21 09:10	0	27	GnRH-agonist long protocol	18.26	primary	Mixed	6	IVF	NA	6.79	4.47	42.68	17.7	4	4410	1.77	0.717	15	19	4	2016-09-24	2	2	0	0			- -
1542	2016-09-23 09:50	0	30	GnRH-agonist long protocol	19.23	primary	male	2	ICSI	NA	6.87	7.68	35.57	14.13	3	3820	3.73	0.804	11.4	9	4	2016-09-26	2	2	0	1	intrauterine pregnancy		2017-06-11	39	vaginal			female	3.2
1543	2016-09-29 09:35	0	26	GnRH-agonist long protocol	20.39	primary	Mixed	3	IVF	NA	8.14	8.67	49.03	13.76	2	2413	2.66	0.699	9.2	10	6	2016-10-02	2	2	0	1	intrauterine pregnancy		2017-06-12	38	vaginal	male	2.9
1544	2016-09-29 10:10	0	42	GnRH-agonist long protocol	21.63	secondary	Mixed	3	IVF	NA	8.08	5.52	45.1	11.9	1	1795	0.937	0.858	7.8	14	9	2016-10-02	2	2	0	0			- -
1545	2016-09-30 10:05	0	27	GnRH-agonist long protocol	18.37	primary	tubal	2	IVF	NA	5.71	5.15	32.97	11.51	2	2316	3.14	0.617	13.5	10	2	2016-10-03	2	2	0	0			- -
1546	2016-10-02 09:40	0	34	GnRH-agonist long protocol	19.92	primary	tubal	7	IVF	NA	9.27	7.36	29.03	16.35	2	2045	0.925	1.04	11.2	10	2	2016-10-05	2	2	0	1	intrauterine pregnancy		2017-06-06	37	Cesarean			female	3.4
1547	2016-10-02 11:30	0	40	GnRH-agonist long protocol	23.73	secondary	Mixed	15	IVF	NA	7.85	8.9	21	14.03	2	2960	2.4	0.652	9.8	7	6	2016-10-05	2	1	0	0			- -
1548	2016-10-03 09:20	0	38	GnRH-agonist long protocol	22.76	secondary	tubal	4	IVF	NA	8.86	3.65	36.84	16.24	1	1274	1.92	0.492	10.9	9	4	2016-10-06	2	2	0	0			- -
1549	2016-10-04 09:25	0	35	GnRH-agonist long protocol	20.17	secondary	tubal	2	IVF	NA	8.44	6.03	51.01	15.37	3	3730	1.65	1.35	9.6	15	4	2016-10-07	2	2	0	0			- -
1550	2016-10-05 09:45	0	28	GnRH-agonist long protocol	23.44	secondary	tubal	1	IVF	NA	6.97	0.68	43.254	14.29	1	1473	0.355	1.14	9.1	7	3	2016-10-08	2	2	0	1	intrauterine pregnancy		2017-07-01	40	vaginal			female	2.9
1551	2016-10-05 10:00	0	33	GnRH-agonist long protocol	18.65	primary	male	3	IVF	NA	7.3	6.78	22.83	10.59	2	2160	1.73	0.487	11.5	6	4	2016-10-08	2	2	0	1	intrauterine pregnancy		2017-07-06	41	vaginal	male	3.9
1552	2016-10-05 10:20	0	26	GnRH-agonist long protocol	NA	secondary	tubal	5	IVF	NA	7.257	3.695	33	17.19	2	2829	1.28	0.922	7.8	10	2	2016-10-08	2	1	0	1	intrauterine pregnancy		2017-06-22	39	vaginal			female	2.4
1553	2016-10-07 09:40	0	41	GnRH-agonist long protocol	23.07	secondary	tubal	0	IVF	NA	8.84	5.23	45.9	14.45	1	1781	0.578	0.587	7.7	9	4	2016-10-10	2	1	0	0			- -
1554	2016-10-08 09:10	0	29	GnRH-agonist long protocol	18.26	secondary	tubal	1	IVF	NA	5.89	4.47	25.54	17.76	3	3602	2.82	1.13	8.4	12	4	2016-10-11	2	2	0	1	intrauterine pregnancy		2017-06-19	38	Cesarean	male	3.1
1555	2016-10-08 09:15	0	34	GnRH-agonist long protocol	21.23	primary	Mixed	3	IVF	NA	8.4	5.1	43.43	18.88	2	2638	2.58	0.858	14.9	12	4	2016-10-11	2	1	0	1	intrauterine pregnancy		2017-06-15	37	Cesarean			female	2.7
1556	2016-10-09 09:20	1-2	32	GnRH-agonist long protocol	23.44	secondary	tubal	1	IVF	NA	7.83	5.46	40.65	14.27	3	3714	1.21	1.04	13	18	6	2016-10-12	2	2	0	0			- -
1557	2016-10-09 10:00	1-2	32	GnRH-agonist long protocol	21.6	secondary	male	6	ICSI	NA	9.59	3.94	13.23	14.08	1	1448	1.42	0.65	14.1	8	4	2016-10-12	2	2	0	1	intrauterine pregnancy		2017-07-07	40	Cesarean	male	3.15
1558	2016-10-11 09:15	1-2	33	GnRH-agonist long protocol	27.58	secondary	male	1	ICSI	NA	6.41	2.23	26	13	2	2404	5.49	0.785	13	8	2	2016-10-14	2	2	0	1	intrauterine pregnancy		2017-06-17	38	Cesarean			female	3.6
1559	2016-10-14 09:35	≥3	32	GnRH-agonist long protocol	20.7	primary	male	10	ICSI	NA	2.87	3.12	26.23	15.44	1	1835	0.477	0.96	11.1	17	5	2016-10-17	2	2	0	0			- -
1560	2016-10-15 09:25	0	28	GnRH-agonist long protocol	18.13	primary	male	1	ICSI	NA	5.06	2.59	60.62	22.87	1	296.6	0.797	0.326	13	2	2	2016-10-18	2	1	0	1	intrauterine pregnancy		2017-07-06	39	vaginal			female	3.8
1561	2016-10-17 09:10	0	26	GnRH-agonist long protocol	24.46	primary	male	2	IVF	NA	6.49	5.39	29.34	11.89	1	1975	1.39	0.889	9.6	14	4	2016-10-20	2	2	0	1	intrauterine pregnancy		2017-06-27	38	Cesarean			female	2.9
1562	2016-10-19 09:35	1-2	29	GnRH-agonist long protocol	21.64	secondary	tubal	4	IVF	NA	7.67	5.86	57.03	16.65	3	3910	1.31	1.05	12	13	4	2016-10-22	2	2	0	1	intrauterine pregnancy		2017-07-01	38	vaginal			female	3
1563	2016-10-19 09:50	1-2	47	GnRH-agonist long protocol	22.03	secondary	Mixed	13	ICSI	NA	7.37	3.89	33.87	19.79	1	1116	2.03	0.58	13.5	7	4	2016-10-22	2	1	0	0			- -
1564	2016-10-21 08:55	0	30	GnRH-agonist long protocol	20.7	primary	male	3	IVF	NA	3.01	5.36	31.27	20.93	2	2069	2.29	1.33	11.5	4	2	2016-10-24	2	1	0	1	intrauterine pregnancy		2017-06-24	37	vaginal			female	2.8
1565	2016-10-22 09:40	0	30	GnRH-agonist long protocol	22.04	primary	Mixed	0	IVF	NA	5.29	2.81	14.09	15.68	2	2136	1.32	1.19	15.3	11	4	2016-10-25	2	2	0	1	intrauterine pregnancy		2017-07-06	38	vaginal			female	3.6
1566	2016-10-28 09:30	0	44	GnRH-agonist long protocol	19.63	secondary	male	8	ICSI	NA	5.11	4.85	21	16.44	3	3738	2.6	0.899	16	10	6	2016-10-31	2	2	0	0			- -
1567	2016-10-29 09:05	1-2	36	GnRH-agonist long protocol	22.04	secondary	male	2	ICSI	NA	8.92	5	29.77	27.37	3	3158	0.605	1.09	11.6	12	6	2016-11-01	2	1	0	0			- -
1568	2016-11-03 10:15	0	37	GnRH-agonist long protocol	18.55	secondary	tubal	1	IVF	NA	4.61	3.92	51.41	20.41	2	2587	2.07	1.16	12.9	8	2	2016-11-06	2	2	0	0			- -
1569	2016-11-03 10:45	0	26	GnRH-agonist long protocol	21.63	primary	male	5	ICSI	NA	6.7	1.39	8.83	11.66	1	1677	1.18	0.833	9.5	7	4	2016-11-06	2	1	0	0			- -
1570	2016-11-03 11:00	0	36	GnRH-agonist long protocol	21.56	secondary	tubal	2	IVF	NA	6.46	6.19	33.39	21.64	2	2456	1.7	0.633	9.2	13	4	2016-11-06	2	2	0	1	intrauterine pregnancy		2017-07-05	37	Cesarean			female	2.6
1571	2016-11-04 08:35	1-2	38	GnRH-agonist long protocol	24.65	secondary	male	1	ICSI	NA	5.53	2.55	20.9	12.95	1	934.1	0.763	0.518	7	9	5	2016-11-07	2	2	0	0			- -
1572	2016-11-07 09:50	1-2	38	GnRH-agonist long protocol	20.08	secondary	tubal	8	IVF	NA	4.32	2.87	7.27	14.99	1	636.8	1.56	0.482	8	2	1	2016-11-10	1	1	0	0			- -
1573	2016-11-07 10:00	0	40	GnRH-agonist long protocol	24.22	secondary	Mixed	2	IVF	NA	4.7	2.94	38.16	9.76	1	1882	1.56	0.751	15.9	10	4	2016-11-10	2	2	0	1	intrauterine pregnancy	yes	- -
1574	2016-11-11 09:20	0	29	GnRH-agonist long protocol	22.77	primary	tubal	0	IVF	NA	7.14	4.39	57	15.63	1	1987	1.97	1.18	11.8	10	2	2016-11-14	2	1	0	1	intrauterine pregnancy		2017-07-01	35	Cesarean	male	2.3	female	2.65
1575	2016-11-14 08:40	0	26	GnRH-agonist long protocol	20.32	primary	tubal	2	IVF	NA	4.64	8.45	62.9	10.56	3	3368	1.12	0.711	13.1	15	4	2016-11-17	2	2	0	1	intrauterine pregnancy		2017-07-20	37	Cesarean	female	2.6	female	2.45
1576	2016-11-23 10:40	0	28	GnRH-agonist long protocol	19.68	primary	male	3	ICSI	NA	6.61	6.97	26.02	9.64	4	4374	2.49	0.796	11.1	12	6	2016-11-26	2	2	0	1	intrauterine pregnancy		2017-08-23	40	Cesarean	male	3
1577	2016-11-24 09:10	0	29	GnRH-agonist long protocol	26.04	primary	tubal	3	IVF	NA	6.33	5.31	38.66	6.84	3	3232	1.36	0.42	12.9	12	2	2016-11-27	2	2	0	0			- -
1578	2016-11-25 09:10	0	30	GnRH-agonist long protocol	18.44	primary	male	2	IVF	NA	7.38	4.17	24.27	16.43	2	2398	1.26	0.66	9.6	13	2	2016-11-28	2	2	0	0			- -
1579	2016-11-26 09:45	0	24	GnRH-agonist long protocol	20.7	secondary	male	1	ICSI	NA	6.66	5.99	45.88	12.93	1	1689	1.51	0.61	11.7	15	7	2016-11-29	2	2	0	1	intrauterine pregnancy		2017-08-24	40	Cesarean			female	3.6
1580	2016-11-26 10:10	0	27	GnRH-agonist long protocol	18.9	secondary	tubal	0	IVF	NA	7.46	5.65	32.19	12.91	4	4050	1.24	0.925	12.5	10	4	2016-11-29	2	2	0	1	intrauterine pregnancy		2017-08-01	35	Cesarean	female	2.3	female	2.5
1581	2016-11-27 10:05	0	27	GnRH-agonist long protocol	25.39	secondary	Mixed	1	IVF	NA	6.54	1.12	19.91	8.33	3	3738	1.8	0.877	10.4	10	4	2016-11-30	2	2	0	1	intrauterine pregnancy		2017-08-11	38	vaginal			female	2.4
1582	2016-11-27 11:20	0	28	GnRH-agonist long protocol	23.44	primary	tubal	5	IVF	NA	6.71	5.19	39.18	9.89	2	2490	2.36	0.844	12.9	14	4	2016-11-30	2	2	0	1	intrauterine pregnancy		2017-08-18	40	vaginal	male	3.2
1583	2016-11-28 10:50	0	31	GnRH-agonist long protocol	22.51	secondary	tubal	1	IVF	NA	7.49	3.92	28.74	25.5	2	2787	1.18	0.919	10.6	7	4	2016-12-01	2	2	0	1	intrauterine pregnancy		2017-08-21	40	vaginal	male	2.85
1584	2016-11-29 10:00	0	41	GnRH-agonist long protocol	20.96	secondary	Unexplained	1	IVF	NA	9.91	4.48	31.21	15.03	1	1835	2.09	0.877	10	8	7	2016-12-02	2	2	1	1	intrauterine pregnancy	yes	- -
1585	2016-12-02 10:10	1-2	31	GnRH-agonist long protocol	19.53	primary	Mixed	2	ICSI	NA	9.41	5.32	30.52	18.63	1	892.4	0.1	0.413	9.6	6	4	2016-12-05	2	2	0	0			- -
1586	2016-12-03 09:40	0	30	GnRH-agonist long protocol	21.61	secondary	male	1	IVF	NA	7.57	7.33	36.4	14.88	4	4718	1.61	1.14	10.8	16	4	2016-12-06	2	2	0	1	intrauterine pregnancy		2017-08-07	37	Cesarean	female	3.35	female	2.65
1587	2016-12-06 08:40	0	30	GnRH-agonist long protocol	24.61	secondary	tubal	3	IVF	NA	5.91	4.3	56.75	11.82	3	3398	2.2	1.41	11	18	6	2016-12-09	2	2	0	1	intrauterine pregnancy		2017-08-29	40	vaginal	male	3.5
1588	2016-12-09 09:30	0	26	GnRH-agonist long protocol	17.99	primary	tubal	1	IVF	NA	5.75	7.05	22.87	9.72	3	3790	3.09	0.958	10.7	15	4	2016-12-12	2	2	0	1	intrauterine pregnancy		2017-08-04	36	Cesarean	female	2.5	female	2.7
1589	2016-12-10 09:35	0	44	GnRH-agonist long protocol	18.73	secondary	tubal	10	IVF	NA	6.48	4.97	16.82	19.64	1	1972	2.49	0.372	14.5	8	5	2016-12-13	2	1	0	0			- -
1590	2016-12-14 10:00	0	38	GnRH-agonist long protocol	21.09	secondary	tubal	3	IVF	NA	4.81	3.74	12.91	17.72	1	1960	1.35	0.914	11.2	9	5	2016-12-17	2	2	0	0			- -
1591	2016-12-18 09:50	0	41	GnRH-agonist long protocol	21.5	secondary	tubal	6	IVF	NA	4.9	4.62	22.58	23.4	3	3636	2.36	0.757	12.5	8	4	2016-12-21	2	2	0	1	intrauterine pregnancy	yes	- -
1592	2016-12-19 09:00	0	34	GnRH-agonist long protocol	21.64	secondary	tubal	10	IVF	NA	6.25	5.31	37.38	9.82	1	1750	2.79	0.804	9.1	8	5	2016-12-22	2	1	0	1	intrauterine pregnancy		2017-07-12	31	Cesarean	male	1.35
1593	2016-12-19 09:15	0	38	GnRH-agonist long protocol	20.31	secondary	male	2	IVF	NA	6.98	3.38	62	20.44	3	3826	1.12	0.827	14.5	13	6	2016-12-22	2	2	0	0			- -
1594	2016-12-23 09:00	0	37	GnRH-agonist long protocol	30.44	secondary	Mixed	4	IVF	NA	7.3	1.54	21.82	17.79	1	1606	2.13	0.868	13.1	6	3	2016-12-26	2	2	0	1	intrauterine pregnancy		2017-08-27	37	Cesarean	male	3.8
1595	2016-12-24 09:50	≥3	36	GnRH-agonist long protocol	22.1	secondary	male	6	ICSI	NA	9.45	5.28	36.22	17.05	1	382.2	0.12	0.516	10	1	1	2016-12-27	1	1	0	0			- -
1596	2016-12-24 10:45	1-2	22	GnRH-agonist long protocol	17.97	primary	male	2	ICSI	NA	7.76	4.81	35.09	12.1	2	2505	0.178	1.18	9.1	16	4	2016-12-27	2	2	0	1	intrauterine pregnancy		2017-09-10	39	vaginal			female	3
1597	2016-12-27 10:20	0	30	GnRH-agonist long protocol	17.44	secondary	male	2	IVF	NA	7.17	5.4	43.02	19.54	3	3048	2.54	0.973	10	18	7	2016-12-30	2	2	0	0			- -
1598	2016-12-29 09:05	1-2	44	GnRH-agonist long protocol	21.76	secondary	tubal	15	IVF	NA	8.2	4.65	44.22	14.68	2	2434	0.807	1.19	13.1	13	6	2017-01-01	2	2	0	1	intrauterine pregnancy	yes	- -
1599	2017-01-02 10:15	1-2	43	GnRH-agonist long protocol	23.23	secondary	Mixed	2	IVF	NA	8.84	2.78	33.92	15.76	2	2333	0.45	0.731	7.1	10	7	2017-01-05	2	2	0	1	intrauterine pregnancy	yes	- -
1600	2017-01-01 10:30	0	31	GnRH-agonist long protocol	18.66	primary	tubal	2	IVF	NA	7.58	6.5	39.72	11.61	1	1576	0.37	0.823	8.9	7	5	2017-01-04	2	1	0	0			- -
1601	2017-01-03 09:10	0	26	GnRH-agonist long protocol	24.21	primary	tubal	1	IVF	NA	6.82	4.85	37.22	9.87	1	850.3	1.98	1.25	10.8	8	4	2017-01-06	2	2	0	0			- -
1602	2017-01-05 09:30	0	44	GnRH-agonist long protocol	21.45	primary	Mixed	2	IVF	NA	3.78	2.04	39.5	7.8	1	724.1	0.326	0.935	11	12	4	2017-01-08	2	1	0	0			- -
1603	2017-01-06 09:15	0	43	GnRH-agonist long protocol	29.3	secondary	tubal	2	IVF	NA	7.13	5.67	32.05	12.78	2	2736	1.29	1.23	9.6	24	7	2017-01-09	2	2	0	0			- -
1604	2017-01-08 09:40	0	30	GnRH-agonist long protocol	17.78	secondary	Mixed	2	IVF	NA	7.98	7.85	47.85	11.12	3	3346	0.873	0.981	12.8	12	4	2017-01-11	2	2	0	0			- -
1605	2017-01-08 10:00	0	31	GnRH-agonist long protocol	23.44	primary	tubal	2	IVF	NA	8.8	4.3	44	16.89	3	3033	1.91	0.868	16.3	7	4	2017-01-11	2	2	0	1	intrauterine pregnancy		2017-09-27	40	vaginal			female	3
1606	2017-01-10 09:43	0	31	GnRH-agonist long protocol	19.6	primary	tubal	1	IVF	NA	6.23	5.37	49.37	12.07	1	1982	1.43	0.876	8.2	14	4	2017-01-13	2	1	0	1	ectopic pregnancy		- -
1607	2017-01-15 09:50	1-2	41	GnRH-agonist long protocol	21.78	secondary	tubal	1	IVF	NA	1.59	2.66	25.97	16.71	3	3294	1.47	0.6	11.9	11	2	2017-01-18	2	1	0	0			- -
1608	2017-01-20 08:50	0	26	GnRH-agonist long protocol	20.03	primary	tubal	3	IVF	NA	5.238	6.099	69.962	28.08	3	3102	2.67	1.33	15.7	9	3	2017-01-23	2	2	0	1	intrauterine pregnancy		2017-09-19	37	Cesarean	male	3.1
1609	2017-02-18 10:00	0	30	GnRH-agonist long protocol	17.72	primary	tubal	1	IVF	NA	5.17	5.84	61.93	16.43	2	2044	0.817	0.546	8.8	9	4	2017-02-21	2	2	0	0			- -
1610	2017-02-24 08:45	0	35	GnRH-agonist long protocol	18.43	primary	male	2	IVF	NA	7.56	8.07	33.57	14.9	3	3080	0.507	1.17	15.7	11	4	2017-02-27	2	2	0	0			- -
1611	2017-02-25 09:00	0	28	GnRH-agonist long protocol	26.14	secondary	tubal	3	IVF	NA	8.41	6.96	35.41	27.51	3	3102	1.24	1.81	8.4	13	2	2017-02-28	2	1	0	0			- -
1612	2017-02-25 10:20	0	27	GnRH-agonist long protocol	23.92	secondary	male	4	IVF	NA	5.66	3.22	15.98	13.93	2	2193	2.1	0.926	11	15	4	2017-02-28	2	2	0	1	intrauterine pregnancy		2017-11-03	38	Cesarean	female	2.75	female	2.7
1613	2017-02-27 10:50	0	31	GnRH-agonist long protocol	22.04	primary	male	3	IVF	NA	3.76	3.56	17.59	12.84	2	2130	1.55	0.483	11	3	1	2017-03-02	1	1	0	0			- -
1614	2017-02-28 09:15	0	31	GnRH-agonist long protocol	22.89	primary	male	4	ICSI	NA	6.65	3.96	62.45	8.22	2	2286	1.92	1.14	10.3	11	6	2017-03-03	2	2	0	1	intrauterine pregnancy		2017-10-10	34	Cesarean	male	2.1	male	2.15
1615	2017-03-07 09:00	0	23	GnRH-agonist long protocol	18.37	primary	tubal	4	IVF	NA	7.17	6.91	41.81	14.23	2	2186	1.24	1.22	10.1	12	4	2017-03-10	2	2	0	0			- -
1616	2017-03-07 10:40	0	41	GnRH-agonist long protocol	20.63	secondary	Mixed	2	IVF	NA	4.56	3.75	29.4	17.45	1	1110	1.71	0.395	10.2	3	2	2017-03-10	2	1	0	0			- -
1617	2017-03-10 09:10	1-2	26	GnRH-agonist long protocol	17.09	primary	male	5	IVF	NA	8.56	2.83	30.68	23.98	1	1266	2.84	0.57	12.6	2	1	2017-03-13	1	1	0	1	intrauterine pregnancy	yes	- -
1618	2017-03-13 09:00	0	35	GnRH-agonist long protocol	20.51	secondary	male	2	IVF	NA	6.56	2.83	65.27	12.79	3	3200	2.55	1.1	9.9	12	4	2017-03-16	2	2	0	1	intrauterine pregnancy		2017-11-14	37	Cesarean	male	2.15
1619	2017-03-13 09:30	0	37	GnRH-agonist long protocol	23.83	secondary	tubal	1	IVF	NA	8.27	4.77	NA	16.97	4	4852	1.19	0.772	12.4	14	4	2017-03-16	2	2	0	1	intrauterine pregnancy		2017-11-28	39	vaginal	male	2.85
1620	2017-03-13 10:50	0	34	GnRH-agonist long protocol	20.31	secondary	Mixed	2	IVF	NA	4.98	2.84	53.77	17.58	1	553.7	1.93	0.428	9.1	3	3	2017-03-16	2	1	0	1	intrauterine pregnancy		2017-12-01	39	vaginal			female	3.12
1621	2017-03-13 10:10	1-2	39	GnRH-agonist long protocol	25.07	secondary	tubal	1	IVF	NA	8.37	3.47	67.9	12.69	1	591.8	1.43	0.32	10.2	4	4	2017-03-16	2	2	0	0			- -
1622	2017-03-16 09:50	0	36	GnRH-agonist long protocol	18.83	secondary	male	3	ICSI	NA	7.94	5.98	60.68	21.16	2	2208	1.93	0.515	9.7	10	3	2017-03-19	2	2	0	0			- -
1623	2017-03-17 09:20	0	27	GnRH-agonist long protocol	21.34	primary	male	1	IVF	NA	7.58	8.12	16.22	8.91	3	3026	1.3	0.104	9.7	11	4	2017-03-20	2	1	0	0			- -
1624	2017-03-20 09:20	0	29	GnRH-agonist long protocol	21.33	primary	tubal	4	IVF	NA	6.7	3.51	44.33	24.16	1	1840	3	0.889	13.5	10	2	2017-03-23	2	1	0	0			- -
1625	2017-03-21 08:50	1-2	45	GnRH-agonist long protocol	NA	secondary	tubal	1	IVF	NA	2.68	8.25	14.8	13.1	1	456.5	0.574	1.2	9.2	4	2	2017-03-24	2	1	0	0			- -
1626	2017-03-21 09:15	0	41	GnRH-agonist long protocol	21.48	secondary	tubal	4	IVF	NA	2.35	2.2	5	22.42	1	1999	4.91	1.32	10	9	3	2017-03-24	2	1	0	0			- -
1627	2017-03-21 09:25	0	44	GnRH-agonist long protocol	21.09	primary	male	2	IVF	NA	5.21	3.97	58.11	16.26	2	2166	1.27	0.987	7.4	8	4	2017-03-24	2	2	0	0			- -
1628	2017-03-21 09:45	0	40	GnRH-agonist long protocol	22.06	secondary	tubal	1	IVF	NA	5.9	2.93	26	13.04	1	833	1.55	0.453	8.2	5	4	2017-03-24	2	1	0	0			- -
1629	2017-03-23 10:40	0	34	GnRH-agonist long protocol	19.48	secondary	male	3	IVF	NA	8.98	6.04	35.6	21.86	2	2122	2.53	1.03	8.5	7	2	2017-03-26	2	1	0	0			- -
1630	2017-03-23 10:30	0	32	GnRH-agonist long protocol	25.81	secondary	tubal	1	IVF	NA	6.9	2.9	22.3	14.21	3	3748	1.2	0.795	8.8	15	2	2017-03-26	2	2	0	1	intrauterine pregnancy		2017-12-03	38	Cesarean	male	3
1631	2017-03-25 09:20	0	29	GnRH-agonist long protocol	20.4	secondary	tubal	1	IVF	NA	7.1	3.7	29.15	12.26	2	2670	0.668	0.895	7.3	16	2	2017-03-28	2	2	0	1	intrauterine pregnancy	yes	- -
1632	2017-03-25 09:10	0	34	GnRH-agonist long protocol	21.78	secondary	tubal	8	IVF	NA	7.665	6.787	34.33	24.17	1	1671	0.19	1.24	11.2	7	4	2017-03-28	2	2	0	1	intrauterine pregnancy		2017-12-13	40	vaginal			female	3.04
1633	2017-03-26 09:45	0	34	GnRH-agonist long protocol	20.34	primary	male	1	ICSI	NA	7.45	5	33.21	12.18	3	3016	1.39	1.12	11.5	15	4	2017-03-29	2	2	0	1	intrauterine pregnancy		2017-11-29	37	Cesarean	male	2.7	female	1.9
1634	2017-03-27 10:10	≥3	36	GnRH-agonist long protocol	22.41	secondary	male	4	ICSI	NA	8.8	6.6	5	18.41	2	2071	1.13	1.01	19.9	12	7	2017-03-30	2	2	0	0			- -
1635	2017-03-28 09:50	1-2	33	GnRH-agonist long protocol	20	secondary	male	0	ICSI	NA	5.11	3.77	54.32	25.9	3	3526	1.16	1.16	10.4	13	9	2017-03-31	2	2	0	0			- -
1636	2017-03-28 09:15	0	35	GnRH-agonist long protocol	26.37	secondary	tubal	2	IVF	NA	6.15	7.19	71.36	15.64	4	4328	1.45	0.931	14.7	19	4	2017-03-31	2	2	0	1	intrauterine pregnancy		2017-12-05	38	Cesarean	male	3.35
1637	2017-04-03 09:44	0	35	GnRH-agonist long protocol	21.88	primary	Mixed	2	IVF	NA	6.26	1.98	30.05	14.21	1	724.1	0.599	1.12	11.8	12	4	2017-04-06	2	2	0	1	intrauterine pregnancy		2017-12-05	37	Cesarean	female	2.45	female	2.65
1638	2017-04-03 09:50	0	26	GnRH-agonist long protocol	19.57	secondary	tubal	1	IVF	NA	6.65	6.9	26.73	14.68	2	2498	2.88	1	NA	17	4	2017-04-06	2	2	0	1	intrauterine pregnancy		2017-12-06	37	Cesarean	male	2.5
1639	2017-04-03 10:00	0	35	GnRH-agonist long protocol	22.27	secondary	male	5	IVF	NA	6.07	2.14	43.34	14.5	1	1120	1.65	0.684	14.2	9	7	2017-04-06	2	2	0	0			- -
1640	2017-04-07 10:15	0	32	GnRH-agonist long protocol	18.37	secondary	tubal	2	IVF	NA	5	5.48	27.57	11.53	3	3450	2.7	0.99	7.8	18	4	2017-04-10	2	2	0	1	intrauterine pregnancy		2017-12-07	36	Cesarean	male	2.3	male	2.6
1641	2017-04-08 09:25	0	34	GnRH-agonist long protocol	NA	secondary	Mixed	5	IVF	NA	6.59	2.67	36.58	19.28	2	2686	1.68	1.19	14.1	11	7	2017-04-11	2	2	0	1	intrauterine pregnancy		2017-12-28	40	vaginal			female	2.95
1642	2017-04-10 09:20	0	43	GnRH-agonist long protocol	20.81	secondary	tubal	11	IVF	NA	6.07	3.97	86.63	16.86	2	2339	0.679	0.862	12	8	7	2017-04-13	2	2	0	0			- -
1643	2017-04-11 10:33	0	37	GnRH-agonist long protocol	19.95	secondary	tubal	1	IVF	NA	7.88	4.46	83	18.19	1	847.8	0.8	0.593	9.4	6	4	2017-04-14	2	1	0	0			- -
1644	2017-04-15 09:20	0	37	GnRH-agonist long protocol	22.03	secondary	tubal	1	IVF	NA	5.57	4.16	45.78	11.99	2	2921	2.37	0.98	10.3	9	6	2017-04-18	2	1	0	1	intrauterine pregnancy		2017-12-19	37	Cesarean	male	2.6	female	3
1645	2017-04-15 08:45	0	42	GnRH-agonist long protocol	20.81	secondary	tubal	2	IVF	NA	3.08	4.59	15	17.98	1	1061	1.81	0.38	10.5	2	1	2017-04-18	1	1	0	1	intrauterine pregnancy	yes	- -
1646	2017-04-15 09:05	0	28	GnRH-agonist long protocol	17.69	secondary	Mixed	2	IVF	NA	4.72	3.45	41.28	14.4	4	4554	1.67	0.947	13	15	4	2017-04-18	2	1	0	0			- -
1647	2017-04-16 10:00	0	27	GnRH-agonist long protocol	21.85	secondary	male	2	ICSI	NA	5.62	3.14	27.16	4.08	1	604.5	1.25	0.935	9.5	5	5	2017-04-19	2	1	0	1	intrauterine pregnancy		2017-12-25	37	vaginal	male	2.8
1648	2017-04-20 08:50	0	28	GnRH-agonist long protocol	20.55	secondary	tubal	2	IVF	NA	6.23	3.35	66.21	11.55	1	1556	1.4	0.964	9.4	12	4	2017-04-23	2	1	0	1	intrauterine pregnancy		2018-01-05	39	Cesarean	male	2.9	female	2.7
1649	2017-04-24 09:30	0	33	GnRH-agonist long protocol	19.95	secondary	tubal	9	IVF	NA	11.1	4.86	65.17	27.82	1	508.5	1.46	0.156	9	2	2	2017-04-27	2	1	0	0			- -
1650	2017-04-24 10:00	≥3	40	GnRH-agonist long protocol	22.35	primary	tubal	6	ICSI	NA	7.38	3.59	35.76	13.24	1	746.6	2.24	0.266	10.1	5	2	2017-04-27	2	1	0	0			- -
1651	2017-04-24 10:10	1-2	38	GnRH-agonist long protocol	18.82	primary	tubal	8	IVF	NA	3.3	8.14	60.77	14.68	1	1449	1.51	0.452	9.6	10	4	2017-04-27	2	1	0	0			- -
1652	2017-04-27 09:50	0	36	GnRH-agonist long protocol	20.57	secondary	tubal	6	IVF	NA	6.2	3.82	40.44	14.52	2	2260	2.02	0.897	14.8	13	4	2017-04-30	2	1	0	1	intrauterine pregnancy		2017-12-11	34	Cesarean	male	2.26	female	2.28
1653	2017-04-28 10:03	0	31	GnRH-agonist long protocol	16.41	primary	Mixed	2	IVF	NA	2.51	2.36	5	16.6	2	2103	3.78	1.05	11.2	18	4	2017-05-01	2	1	0	1	intrauterine pregnancy		2018-01-17	39	vaginal	male	3.31
1654	2017-04-28 10:20	0	37	GnRH-agonist long protocol	22.35	secondary	Mixed	2	ICSI	NA	7.45	3.69	33.04	13.63	2	2648	1.18	0.906	12.5	11	4	2017-05-01	2	2	0	1	intrauterine pregnancy		2018-01-14	39	vaginal	male	3.6
1655	2017-04-30 09:05	0	33	GnRH-agonist long protocol	21.23	secondary	tubal	3	IVF	NA	5.83	6.37	27.3	14.8	3	3696	2.45	1.19	8.8	19	4	2017-05-03	2	1	0	1	intrauterine pregnancy		2018-01-15	39	vaginal	male	3.05
1656	2017-05-02 09:40	0	41	GnRH-agonist long protocol	23.24	secondary	tubal	9	IVF	NA	6	5.16	17.88	12.46	1	1499	0.688	0.576	13.7	11	4	2017-05-05	2	1	0	1	intrauterine pregnancy		2018-01-10	38	Cesarean	male	3.3
1657	2017-05-02 09:30	0	32	GnRH-agonist long protocol	20.76	secondary	male	1	ICSI	NA	7.9	5.99	61.98	16.51	1	1522	1.89	0.624	13	9	4	2017-05-05	2	2	0	0			- -
1658	2017-05-03 09:50	0	32	GnRH-agonist long protocol	19.78	secondary	tubal	1	IVF	NA	3.91	4.85	59.5	19.43	2	2109	1.01	0.697	14.8	14	2	2017-05-06	2	1	0	1	intrauterine pregnancy		2018-01-16	38	vaginal			female	3.12
1659	2017-05-04 09:25	0	36	GnRH-agonist long protocol	30.48	secondary	tubal	3	IVF	NA	5.89	3.03	25.68	11.72	1	1942	1.57	0.892	10.7	8	2	2017-05-07	2	1	0	0			- -
1660	2017-05-05 10:10	1-2	39	GnRH-agonist long protocol	24.01	secondary	Mixed	4	IVF	NA	5.22	2.58	18.96	11.66	2	2245	1.25	0.444	12.3	10	4	2017-05-08	2	2	0	0			- -
1661	2017-05-06 09:35	0	30	GnRH-agonist long protocol	22.04	secondary	Mixed	2	IVF	NA	1.64	2.74	5	20.41	2	2028	2.38	0.647	7.6	20	6	2017-05-09	2	2	1	1	intrauterine pregnancy		2017-10-26	26	vaginal			female	0.81
1662	2017-05-06 09:20	0	29	GnRH-agonist long protocol	22.04	secondary	male	3	IVF	NA	5.47	5.22	35.89	7.47	3	3076	1.92	0.848	11.9	12	4	2017-05-09	2	2	0	1	intrauterine pregnancy		2018-01-10	37	Cesarean	male	2.55	female	2.65
1663	2017-05-07 09:05	0	40	GnRH-agonist long protocol	20.83	secondary	Mixed	1	IVF	NA	5.49	4.42	17.85	19.36	1	1640	2.75	0.72	9	5	2	2017-05-10	2	2	0	1	intrauterine pregnancy		2018-01-10	37	Cesarean	male	3.1
1664	2017-05-09 08:50	0	42	GnRH-agonist long protocol	21.3	secondary	Mixed	1	IVF	NA	8.49	5.58	55.4	16.71	2	2667	1.54	1.08	5.6	8	7	2017-05-12	2	2	0	1	intrauterine pregnancy		2018-02-01	40	vaginal			female	3.485
1665	2017-05-14 08:55	0	33	GnRH-agonist long protocol	16.82	secondary	tubal	1	IVF	NA	9.64	3.06	42.57	20.13	2	2634	1.23	1.3	7.8	8	4	2017-05-17	2	1	0	0			- -
1666	2017-05-15 09:35	1-2	39	GnRH-agonist long protocol	27.34	secondary	tubal	3	IVF	NA	8.23	4.4	37.68	9.15	2	2420	1.66	0.235	14.3	19	4	2017-05-18	2	1	0	0			- -
1667	2017-05-15 05:15	0	32	GnRH-agonist long protocol	19.22	primary	male	3	ICSI	NA	2.51	8.56	23.31	14.69	2	2454	2.02	0.764	NA	10	2	2017-05-18	2	2	0	0			- -
1668	2017-05-18 10:10	1-2	30	GnRH-agonist long protocol	18.73	primary	Mixed	3	ICSI	NA	5.94	3.27	NA	9.66	3	3008	0.741	0.715	8.6	21	4	2017-05-21	2	1	0	1	intrauterine pregnancy		2018-01-25	38	vaginal			female	2.7
1669	2017-05-19 09:30	1-2	36	GnRH-agonist long protocol	19.11	primary	male	4	ICSI	NA	6.83	2.81	33.86	21.42	1	1794	2.47	0.566	10.3	8	4	2017-05-22	2	2	0	1	intrauterine pregnancy		2018-01-25	37	vaginal	male	3.05
1670	2017-05-20 08:30	≥3	43	GnRH-agonist long protocol	21.48	secondary	Mixed	1	IVF	NA	3.98	1.19	5	18.91	1	721.1	1.07	0.325	10	3	3	2017-05-23	2	3	0	0			- -
1671	2017-05-28 09:20	0	32	GnRH-agonist long protocol	19.98	secondary	male	3	IVF	NA	6.03	5.32	55.95	18.39	3	3632	1.76	1.11	11.2	14	2	2017-05-31	2	2	0	0			- -
1672	2017-05-31 09:15	1-2	44	GnRH-agonist long protocol	25.28	primary	male	19	ICSI	NA	5.52	3.27	55.64	18.06	1	1098	5.49	0.379	9.4	4	3	2017-06-03	2	2	0	0			- -
1673	2017-05-31 09:30	0	29	GnRH-agonist long protocol	20.96	secondary	tubal	4	IVF	NA	3.98	1.56	31.29	13.32	1	839.6	1.42	1.07	9	3	2	2017-06-03	2	1	0	1	intrauterine pregnancy		2018-02-05	37	vaginal			female	3.15
1674	2017-05-31 10:20	0	32	GnRH-agonist long protocol	26.35	primary	male	5	ICSI	NA	6.74	2.38	28.09	10.61	2	2222	2.37	0.466	10.9	12	4	2017-06-03	2	2	0	0			- -
1675	2017-05-31 10:20	0	32	GnRH-agonist long protocol	18.05	secondary	tubal	3	IVF	NA	2.47	2.37	5	17.38	3	3960	1.41	0.894	11.1	18	4	2017-06-03	2	2	0	1	intrauterine pregnancy		2018-02-03	37	Cesarean	male	2.55	male	2.45
1676	2017-06-03 10:00	0	37	GnRH-agonist long protocol	21.93	secondary	male	2	ICSI	NA	7.32	4.12	5	17.51	2	2222	1.85	0.757	11.9	15	4	2017-06-06	2	2	0	0			- -
1677	2017-06-05 09:30	0	27	GnRH-agonist long protocol	22.58	secondary	Mixed	4	IVF	NA	5.59	2.27	22.69	9.7	1	1826	0.948	0.6	9.6	13	2	2017-06-08	2	2	0	0			- -
1678	2017-06-05 09:15	0	25	GnRH-agonist long protocol	27.06	secondary	male	1	ICSI	NA	2.96	1.27	5	14.28	1	1750	1.85	0.547	8.8	10	4	2017-06-08	2	1	0	1	intrauterine pregnancy		2018-02-03	36	Cesarean			female	2.5
1679	2017-06-06 09:25	0	41	GnRH-agonist long protocol	24.03	secondary	Mixed	6	ICSI	NA	7.4	3.67	37.94	14.45	1	1268	0.725	0.306	12.3	8	2	2017-06-09	2	2	0	0			- -
1680	2017-06-06 09:55	0	33	GnRH-agonist long protocol	16.44	primary	male	4	ICSI	NA	5.11	3.51	39.62	12.38	4	4161	1.53	0.796	13.6	18	4	2017-06-09	2	2	0	1	intrauterine pregnancy		2018-01-23	34	Cesarean	male	1.95	female	1.9
1681	2017-06-06 09:35	0	30	GnRH-agonist long protocol	20.67	secondary	tubal	7	IVF	NA	6.84	5.92	26.46	10.14	2	2945	0.633	0.676	11.8	18	2	2017-06-09	2	1	0	1	intrauterine pregnancy		2018-02-21	39	Cesarean			female	3.05
1682	2017-06-06 10:05	0	30	GnRH-agonist long protocol	20.55	secondary	tubal	1	IVF	NA	7.37	4.59	32.02	19.52	1	1476	1.2	0.548	14.3	9	4	2017-06-09	2	1	0	1	intrauterine pregnancy		2018-02-12	38	Cesarean	male	2.9	female	2.4
1683	2017-06-12 09:50	1-2	37	GnRH-agonist long protocol	23.68	primary	male	10	IVF	NA	7.21	4.09	79.49	22.97	2	2335	2.09	0.796	13.6	8	2	2017-06-15	2	1	0	1	intrauterine pregnancy		2018-02-23	39	Cesarean			female	3.15
1684	2017-06-12 09:35	0	35	GnRH-agonist long protocol	22.72	primary	Mixed	1	IVF	NA	8.01	4.75	27.85	21.43	1	1184	2.54	0.507	10.2	8	1	2017-06-15	1	1	0	0			- -
1685	2017-06-13 09:20	0	38	GnRH-agonist long protocol	17.31	primary	male	5	ICSI	NA	7.52	4.65	38.06	17.92	2	2160	3.58	0.741	10.9	9	4	2017-06-16	2	2	0	0			- -
1686	2017-06-15 09:20	0	44	GnRH-agonist long protocol	21.79	secondary	tubal	2	IVF	NA	2.39	3.46	73.89	20.15	1	1887	1.2	1.07	10.4	14	4	2017-06-18	2	2	0	0			- -
1687	2017-06-20 10:32	0	28	GnRH-agonist long protocol	24.22	primary	Mixed	1	IVF	NA	5.76	4.72	19.39	17.1	1	610.6	1.03	1.01	15.5	4	2	2017-06-23	2	1	0	1	intrauterine pregnancy		2018-03-07	39	vaginal	male	3.35
1688	2017-06-25 09:15	0	39	GnRH-agonist long protocol	NA	secondary	tubal	3	IVF	NA	3.75	0.8	7.58	11.58	2	2133	2.03	0.435	13	12	2	2017-06-28	2	2	0	1	intrauterine pregnancy	yes	- -
1689	2017-06-28 09:50	0	41	GnRH-agonist long protocol	21.78	secondary	tubal	2	IVF	NA	1.201	0.46	75.39	13.57	1	893.5	3.23	0.736	11	7	2	2017-07-01	2	2	0	0			- -
1690	2017-06-30 09:00	1-2	31	GnRH-agonist long protocol	19.63	primary	Mixed	7	ICSI	NA	6.81	4.07	34.97	18.4	1	1846	2.31	1.41	10.8	10	1	2017-07-03	1	1	0	0			- -
1691	2017-07-01 10:30	1-2	27	GnRH-agonist long protocol	24.21	primary	tubal	1	IVF	NA	6.82	4.85	37.22	8.4	2	2419	2.98	1.5	9.6	10	2	2017-07-04	2	2	0	1	intrauterine pregnancy		2018-03-22	39	vaginal			female	3.75
1692	2017-07-03 10:00	0	20	GnRH-agonist long protocol	22.48	primary	male	2	ICSI	NA	7.487	4.017	42.87	11.16	2	2874	2.27	0.781	10.1	10	4	2017-07-06	2	2	0	0			- -
1693	2017-07-03 09:40	0	31	GnRH-agonist long protocol	24.34	primary	male	8	ICSI	NA	5.88	7.59	32.06	NA	3	3538	1.11	1.02	11	12	2	2017-07-06	2	1	0	0			- -
1694	2017-07-09 09:25	0	31	GnRH-agonist long protocol	19.31	secondary	male	4	ICSI	NA	6.57	5.24	40.37	20.43	2	2596	4.91	0.906	13	6	2	2017-07-12	2	1	0	1	intrauterine pregnancy	yes	- -
1695	2017-07-12 09:30	0	33	GnRH-agonist long protocol	20.78	primary	Mixed	5	IVF	NA	4.43	1.71	41.44	13.37	3	3876	1.75	1.11	12.9	14	4	2017-07-15	2	1	0	0			- -
1696	2017-07-13 10:00	0	36	GnRH-agonist long protocol	26.44	primary	male	2	ICSI	NA	2.84	0.64	5	9.56	1	822.1	0.782	0.845	11.3	10	6	2017-07-16	2	1	0	1	intrauterine pregnancy		2018-03-26	38	Cesarean	male	3.1
1697	2017-07-14 10:40	0	38	GnRH-agonist long protocol	26.31	secondary	tubal	2	IVF	NA	6.1	4.69	27.49	14.33	1	1677	3.01	0.838	11.5	12	4	2017-07-17	2	2	0	0			- -
1698	2017-07-14 10:00	0	32	GnRH-agonist long protocol	22.15	secondary	tubal	3	IVF	NA	9.05	3.08	13.59	10.84	1	1201	1.51	0.512	11.2	7	4	2017-07-17	2	1	0	1	intrauterine pregnancy		2018-03-22	38	Cesarean	female	3.2	female	3.05
1699	2017-07-17 09:00	0	29	GnRH-agonist long protocol	21.33	primary	Endometriosis	5	IVF	NA	7.67	3.59	69.58	14.42	4	4636	2.36	0.339	13.1	14	2	2017-07-20	2	2	0	1	intrauterine pregnancy		2018-02-20	33	Cesarean	male	1.98
1700	2017-07-17 09:30	0	42	GnRH-agonist long protocol	23.23	secondary	tubal	2	IVF	NA	8.829	5.193	29.73	19.53	2	2163	1.27	0.889	11.8	12	5	2017-07-20	2	2	0	0			- -
1701	2017-07-17 10:30	0	31	GnRH-agonist long protocol	19.92	primary	Unexplained	5	IVF	NA	1.49	1.72	5	18.61	1	770.8	2.05	0.331	13.2	6	2	2017-07-20	2	2	0	1	intrauterine pregnancy		2018-03-23	37	Cesarean	male	2.4	female	2.2
1702	2017-07-21 08:40	0	27	GnRH-agonist long protocol	22.06	secondary	Mixed	3	IVF	NA	6.19	2.4	25.28	8.71	2	2554	5.58	0.637	13.7	30	2	2017-07-24	2	1	0	1	intrauterine pregnancy		2018-03-26	37	Cesarean	male	2.7
1703	2017-07-21 09:45	0	26	GnRH-agonist long protocol	21.23	primary	male	2	ICSI	NA	6.43	3.53	20.66	15.13	2	2665	1.58	0.545	15	18	2	2017-07-24	2	2	0	1	intrauterine pregnancy		2018-03-13	35	Cesarean	male	2.2	female	2
1704	2017-08-02 08:45	0	34	GnRH-agonist long protocol	23.63	secondary	tubal	2	IVF	NA	4.53	7.21	85.23	17.51	2	2250	2.06	0.572	11	10	3	2017-08-05	2	2	0	0			- -
1705	2017-07-24 09:03	0	44	GnRH-agonist long protocol	23.92	secondary	male	1	ICSI	NA	6.04	3.37	47.55	16.49	1	449.8	1.23	0.113	10.9	3	2	2017-07-27	2	2	0	0			- -
1706	2017-07-24 09:25	0	36	GnRH-agonist long protocol	23.37	secondary	tubal	1	IVF	NA	6.79	4.51	23.1	13.08	1	897.5	0.781	0.166	7.3	5	2	2017-07-27	2	1	0	1	intrauterine pregnancy		2018-04-10	39	Cesarean			female	2.65
1707	2017-07-24 09:50	0	26	GnRH-agonist long protocol	20.32	secondary	Mixed	3	ICSI	NA	5.38	3.72	8.68	17.97	2	2619	0.993	0.875	10.3	13	2	2017-07-27	2	2	0	1	ectopic pregnancy		- -
1708	2017-07-25 09:20	0	30	GnRH-agonist long protocol	29.38	primary	male	3	ICSI	NA	8.23	2.31	33.31	11.25	1	1666	2.25	0.417	12.4	10	2	2017-07-28	2	2	0	1	intrauterine pregnancy		2018-04-01	37	Cesarean	female	2.7	female	3.05
1709	2017-07-26 09:10	0	38	GnRH-agonist long protocol	20.03	primary	Endometriosis	2	IVF	NA	5.52	2.87	46.93	19.2	1	1445	1.17	0.784	9.8	4	2	2017-07-29	2	2	0	1	intrauterine pregnancy		2018-04-13	38	Cesarean			female	2.9
1710	2017-07-30 09:50	0	37	GnRH-agonist long protocol	18.67	secondary	tubal	1	IVF	NA	7.46	6.13	81	16.98	1	1544	2.01	0.36	14.9	5	2	2017-08-02	2	2	0	1	intrauterine pregnancy		2018-04-02	37	Cesarean	male	2	male	2.65
1711	2017-08-03 09:20	0	40	GnRH-agonist long protocol	20.58	secondary	tubal	1	IVF	NA	4.14	3.9	27.52	12.96	2	2824	2.02	1.04	9.8	7	2	2017-08-06	2	2	0	1	intrauterine pregnancy		2018-04-11	38	Cesarean			female	2.7
1712	2017-08-08 08:35	0	28	GnRH-agonist long protocol	25.64	primary	male	2	ICSI	NA	4.63	3.1	59.17	13.68	2	2031	0.799	1.05	7.2	11	7	2017-08-11	2	1	0	0			- -
1713	2017-08-06 08:52	1-2	42	GnRH-agonist long protocol	20.31	secondary	tubal	3	IVF	NA	4.71	2.24	55.98	13.72	1	1161	1.56	0.774	7.6	5	2	2017-08-09	2	2	0	1	intrauterine pregnancy		2018-04-13	38	Cesarean	male	3.05
1714	2017-08-08 08:50	0	34	GnRH-agonist long protocol	16.6	primary	tubal	3	IVF	NA	6.97	4.62	14.56	14.37	4	4354	2.15	0.88	10.2	12	2	2017-08-11	2	2	0	1	heterotopic pregnancy		2018-05-03	40	vaginal	male	3.4
1715	2017-08-10 09:35	0	31	GnRH-agonist long protocol	20.55	secondary	tubal	2	IVF	NA	7.6	5.07	33.64	9.68	3	3718	1.56	0.483	NA	19	4	2017-08-13	2	1	0	1	intrauterine pregnancy		2018-02-13	28	vaginal	male	1.85	female	1.15
1716	2017-08-12 08:55	0	32	GnRH-agonist long protocol	24.03	secondary	tubal	3	IVF	NA	4.61	2.72	23.86	17.55	4	4558	1.24	1.43	10	11	2	2017-08-15	2	2	0	0			- -
1717	2017-08-14 09:15	0	37	GnRH-agonist long protocol	24.24	secondary	Ovulatory	2	ICSI	NA	6.08	2.51	9.94	11.79	2	2078	3.13	0.42	13	14	4	2017-08-17	2	2	0	1	intrauterine pregnancy	yes	- -
1718	2017-08-15 08:35	0	33	GnRH-agonist long protocol	21.08	secondary	tubal	4	IVF	NA	7.118	2.92	73.59	20.91	2	2729	4.87	0.496	11.2	7	4	2017-08-18	2	2	0	1	intrauterine pregnancy		2018-04-18	36	Cesarean	female	2.1	female	2.35
1719	2017-08-17 09:20	0	35	GnRH-agonist long protocol	20.56	secondary	tubal	10	IVF	NA	8.602	3.012	23.916	24.1	3	3010	1.9	0.268	8	9	2	2017-08-20	2	1	0	1	intrauterine pregnancy		2018-05-10	41	vaginal	male	2.8
1720	2017-08-17 09:10	0	26	GnRH-agonist long protocol	20.7	primary	tubal	4	IVF	NA	7.17	3.07	35.74	21.78	1	1941	2.09	0.426	13	10	5	2017-08-20	2	2	0	0			- -
1721	2017-08-18 09:05	0	28	GnRH-agonist long protocol	19.23	secondary	male	3	IVF	NA	5.74	3.57	60	17.8	3	3654	1.6	0.893	12.1	13	2	2017-08-21	2	1	0	1	intrauterine pregnancy		2018-05-02	38	vaginal			female	2.68
1722	2017-08-18 09:45	0	35	GnRH-agonist long protocol	23.83	secondary	tubal	0	IVF	NA	7.954	6.345	54.511	15.37	3	3012	3.98	0.521	8.8	22	2	2017-08-21	2	1	0	0			- -
1723	2017-08-19 09:15	1-2	36	GnRH-agonist long protocol	20.31	secondary	tubal	6	IVF	NA	8.02	3.7	45.36	10.44	1	1360	1.7	0.075	12.7	4	3	2017-08-22	2	2	0	0			- -
1724	2017-08-20 09:30	0	24	GnRH-agonist long protocol	18.36	primary	male	1	ICSI	NA	7.52	5.51	41.03	11.95	4	4672	3.09	0.418	13	14	2	2017-08-23	2	2	0	0			- -
1725	2017-08-21 08:40	0	39	GnRH-agonist long protocol	20.06	secondary	tubal	2	IVF	NA	7.33	5.68	34.83	21.4	3	3698	1.88	1.17	10	14	2	2017-08-24	2	2	0	0			- -
1726	2017-08-21 09:30	0	29	GnRH-agonist long protocol	20.7	primary	Unexplained	2	IVF	NA	3.15	1.58	5	9.05	2	2270	3.06	0.781	10.1	16	2	2017-08-24	2	2	0	1	intrauterine pregnancy		2019-03-20	38	Cesarean			female	3.05
1727	2017-08-26 09:05	0	34	GnRH-agonist long protocol	24.68	secondary	Endometriosis	3	IVF	NA	7.13	5.3	75.81	13.29	3	3010	2.84	0.229	13	12	5	2017-08-29	2	1	0	1	intrauterine pregnancy		2018-04-20	35	Cesarean	male	2.1	female	2.05
1728	2017-08-30 09:30	0	35	GnRH-agonist long protocol	20.2	secondary	tubal	12	IVF	NA	9.17	7.08	59	24.04	2	2358	5.86	0.616	8.5	6	2	2017-09-02	2	2	0	0			- -
1729	2017-09-04 08:50	1-2	31	GnRH-agonist long protocol	17.19	secondary	tubal	3	IVF	NA	7.26	5.43	36.5	22.66	4	4034	1.52	0.568	10	14	4	2017-09-07	2	2	0	0			- -
1730	2017-09-05 10:30	1-2	35	GnRH-agonist long protocol	27.27	primary	Endometriosis	13	IVF	NA	5.98	2.85	48.93	12.48	3	3038	1.26	0.735	9	14	2	2017-09-08	2	2	0	0			- -
1731	2017-09-10 08:55	0	27	GnRH-agonist long protocol	23.12	secondary	Mixed	5	IVF	NA	5.16	3.1	29	13.41	3	3710	2.69	0.536	7.5	10	2	2017-09-13	2	2	0	1	intrauterine pregnancy		2018-05-30	39	vaginal			female	2.4
1732	2017-09-10 09:40	0	29	GnRH-agonist long protocol	25.39	primary	tubal	0	IVF	NA	6.29	5.23	34.2	13.1	1	1437	4.86	0.475	11.3	11	2	2017-09-13	2	1	0	1	intrauterine pregnancy		2018-05-19	37	vaginal	male	2.9
1733	2017-09-11 09:10	0	35	GnRH-agonist long protocol	17.48	secondary	Mixed	1	IVF	NA	2.33	2.37	5	18.12	3	3178	1.28	0.987	7	16	4	2017-09-14	2	2	0	1	intrauterine pregnancy		2018-04-28	34	Cesarean	female	1.98	female	1.5
1734	2017-09-18 09:30	0	40	GnRH-agonist long protocol	24.03	secondary	male	1	IVF	NA	6.72	7.07	37.56	11.58	2	2229	3.02	0.178	11.8	7	4	2017-09-21	2	1	0	0			- -
1735	2017-09-21 08:55	1-2	31	GnRH-agonist long protocol	21.36	primary	Mixed	6	ICSI	NA	8.62	4.16	42.43	20.63	3	3204	1.81	0.695	10.1	11	4	2017-09-24	2	2	0	0			- -
1736	2017-09-21 09:45	0	36	GnRH-agonist long protocol	20.03	primary	male	5	ICSI	NA	9.68	5.77	68.05	19.5	1	1391	1.9	0.086	9.4	6	4	2017-09-24	2	1	0	0			- -
1737	2017-09-22 08:45	0	35	GnRH-agonist long protocol	16.59	secondary	tubal	1	IVF	NA	6.61	2.53	40.73	19.27	1	1951	2.53	0.147	12.3	8	2	2017-09-25	2	2	0	1	intrauterine pregnancy	yes	- -
1738	2017-09-22 09:05	0	27	GnRH-agonist long protocol	19.07	primary	Endometriosis	1	ICSI	NA	4.83	5.14	22.94	19.9	2	2516	4.53	0.386	9.8	7	4	2017-09-25	2	2	0	1	intrauterine pregnancy		2018-05-13	35	Cesarean	male	2.25	female	1.8
1739	2017-09-24 09:10	≥3	33	GnRH-agonist long protocol	20.2	primary	Mixed	5	IVF	NA	5.23	5.11	50.92	19.23	4	4168	1.39	1.04	12.4	12	2	2017-09-27	2	2	0	0			- -
1740	2017-09-24 09:30	1-2	35	GnRH-agonist long protocol	21.72	primary	tubal	7	IVF	NA	6.71	6.04	47	11.08	2	2187	1.64	0.05	12.5	11	5	2017-09-27	2	1	0	1	intrauterine pregnancy	yes	- -
1741	2017-09-26 10:30	0	36	GnRH-agonist long protocol	22.86	secondary	tubal	9	IVF	NA	8.01	5.32	31	13.61	3	3354	1.58	0.767	8	16	1	2017-09-29	1	1	0	0			- -
1742	2017-09-26 09:40	0	36	GnRH-agonist long protocol	22.66	primary	tubal	1	IVF	NA	8.82	5.02	8.69	11.53	1	1037	1.02	0.08	13.5	6	2	2017-09-29	2	1	0	1	intrauterine pregnancy	yes	- -
1743	2017-09-27 10:15	0	25	GnRH-agonist long protocol	18.13	primary	tubal	1	IVF	NA	8.97	4.75	24.69	18.56	1	802.2	3	0.243	13.1	4	4	2017-09-30	2	2	0	1	intrauterine pregnancy		2018-06-17	39	vaginal			female	3.1
1744	2017-09-29 10:00	0	31	GnRH-agonist long protocol	22.22	primary	male	5	IVF	NA	4.54	3.69	50.01	13.22	2	2766	2.63	0.331	9.8	10	2	2017-10-02	2	2	0	1	intrauterine pregnancy		2018-05-06	33	Cesarean	male	1.35	male	1.55
1745	2017-10-02 08:50	0	42	GnRH-agonist long protocol	22.5	secondary	tubal	2	IVF	NA	6.57	3.23	21.15	10.75	1	1422	3.13	0.45	17.7	7	6	2017-10-05	2	2	0	1	intrauterine pregnancy		2018-06-26	40	vaginal	male	3.5
1746	2017-10-02 10:00	1-2	37	GnRH-agonist long protocol	27.18	secondary	tubal	1	IVF	NA	7.91	3.97	34.99	12.37	1	1285	3.08	0.458	7.1	6	2	2017-10-05	2	2	0	0			- -
1747	2017-10-03 08:45	0	31	GnRH-agonist long protocol	20.24	primary	tubal	3	IVF	1.17	8.75	4.09	26.78	19.95	1	1239	3.08	0.249	9.5	6	2	2017-10-06	2	2	0	1	intrauterine pregnancy		2018-06-28	40	vaginal			female	3.5
1748	2017-10-04 09:00	0	26	GnRH-agonist long protocol	20.7	primary	male	1	ICSI	NA	7.24	8.73	39	15.85	1	1550	1.87	0.276	8.6	7	2	2017-10-07	2	2	0	0			- -
1749	2017-10-05 09:20	1-2	41	GnRH-agonist long protocol	25.63	secondary	Mixed	1	IVF	NA	5.22	2.33	53.53	12.99	1	1090	2.75	0.63	NA	6	2	2017-10-08	2	1	0	1	intrauterine pregnancy		2018-06-22	39	Cesarean	male	3.5
1750	2017-10-06 08:45	0	28	GnRH-agonist long protocol	23.62	primary	Mixed	3	IVF	2.665	6.09	3.86	18.34	8.35	2	2613	5.74	0.827	11.6	19	2	2017-10-09	2	2	0	0			- -
1751	2017-10-08 08:32	0	34	GnRH-agonist long protocol	24.03	primary	Mixed	3	IVF	NA	7.09	3.3	42.65	14.64	4	4052	2.05	0.92	9.9	10	2	2017-10-11	2	1	0	0			- -
1752	2017-10-10 08:45	1-2	40	GnRH-agonist long protocol	26.37	secondary	tubal	1	IVF	NA	3.83	5.44	19.28	14.07	2	2279	2.56	0.354	12	6	2	2017-10-13	2	1	0	0			- -
1753	2017-10-10 09:40	0	30	GnRH-agonist long protocol	31.64	primary	Ovulatory	5	IVF	1.687	5.09	3.09	60.43	15.35	3	3116	1.81	0.584	9.9	10	2	2017-10-13	2	2	0	0			- -
1754	2017-10-11 09:05	0	40	GnRH-agonist long protocol	19.63	secondary	tubal	7	IVF	NA	7.49	2.74	34.51	19.8	2	2991	2.18	0.804	9	18	4	2017-10-14	2	2	0	1	intrauterine pregnancy	yes	- -
1755	2017-10-11 09:40	0	39	GnRH-agonist long protocol	22.06	secondary	tubal	1	IVF	NA	7.44	2.59	12.42	9.71	4	4092	6.14	0.385	10.4	13	2	2017-10-14	2	1	0	1	intrauterine pregnancy	yes	- -
1756	2017-10-13 08:50	0	40	GnRH-agonist long protocol	19.07	secondary	tubal	4	IVF	0.213	7.7	5.22	12.92	26.6	2	2332	2.8	0.666	11.9	11	8	2017-10-16	2	2	0	0			- -
1757	2017-10-15 09:20	0	37	GnRH-agonist long protocol	21.45	secondary	Endometriosis	2	IVF	NA	6.38	4.36	18.7	15.49	4	4172	1.89	0.88	7.3	18	4	2017-10-18	2	2	0	1	intrauterine pregnancy		2018-07-06	40	vaginal	male	2.85
1758	2017-10-16 09:15	0	35	GnRH-agonist long protocol	18.03	secondary	male	6	ICSI	NA	3.52	6	41.75	31.49	2	2160	1.6	0.601	14	6	3	2017-10-19	2	1	0	1	intrauterine pregnancy		2018-06-18	37	Cesarean	male	2.6	male	2.55
1759	2017-10-16 09:30	0	42	GnRH-agonist long protocol	22.22	secondary	tubal	1	IVF	1.683	8.12	3.31	50.52	18.08	3	3699	1.86	0.497	8.9	7	6	2017-10-19	2	2	0	0			- -
1760	2017-10-18 09:40	0	35	GnRH-agonist long protocol	18.37	secondary	male	1	ICSI	5.589	7.3	4.43	51.92	22.01	2	2295	3.04	0.593	13.3	6	2	2017-10-21	2	2	0	1	intrauterine pregnancy		2018-06-29	38	Cesarean	male	3.2
1761	2017-10-18 10:00	0	37	GnRH-agonist long protocol	24.65	secondary	Endometriosis	3	ICSI	NA	8.57	6.58	32.71	15.9	2	2231	2.49	0.731	16.6	17	2	2017-10-21	2	2	0	0			- -
1762	2017-10-20 09:25	0	37	GnRH-agonist long protocol	23.56	secondary	tubal	1	IVF	2.214	8.04	4.74	9.88	23.9	1	1295	2.68	0.717	11.3	6	3	2017-10-23	2	1	0	1	intrauterine pregnancy		2018-07-02	38	Cesarean			female	3.1
1763	2017-10-21 09:25	0	29	GnRH-agonist long protocol	21.36	secondary	tubal	2	IVF	NA	6.84	4.86	26.28	22.11	1	1804	2.29	0.346	8.6	8	2	2017-10-24	2	2	0	1	intrauterine pregnancy		2018-06-28	37	vaginal			female	3.05
1764	2017-10-22 09:00	0	28	GnRH-agonist long protocol	22.6	primary	Unexplained	1	ICSI	3.318	9.11	5.9	31.82	16.23	2	2317	2.04	0.326	14.5	12	2	2017-10-25	2	2	0	1	intrauterine pregnancy		2018-07-03	38	vaginal	male	3.5
1765	2017-10-23 08:40	1-2	32	GnRH-agonist long protocol	19.22	primary	male	3	ICSI	NA	1.97	8.56	23.31	22.62	2	2378	1.94	0.584	10	4	4	2017-10-26	2	2	0	0			- -
1766	2017-10-24 08:55	1-2	43	GnRH-agonist long protocol	25.07	secondary	male	1	ICSI	NA	8.21	2.6	55.58	16.83	2	2267	2.83	0.404	11.2	10	7	2017-10-27	2	2	0	1	intrauterine pregnancy		2018-07-17	40	vaginal	male	3.15
1767	2017-10-24 09:10	0	36	GnRH-agonist long protocol	20.7	primary	male	12	ICSI	2.1	7.61	2.97	33	17.62	4	4250	1.55	1.11	10	15	2	2017-10-27	2	1	0	1	intrauterine pregnancy		2018-06-21	37	Cesarean	female	2.35	female	2.65
1768	2017-10-24 10:50	0	32	GnRH-agonist long protocol	16.65	primary	male	4	ICSI	NA	1.01	1.47	42.64	24.78	1	1515	2.2	0.681	10	8	2	2017-10-27	2	1	0	0			- -
1769	2017-10-28 08:50	0	35	GnRH-agonist long protocol	26.04	primary	male	8	IVF	7.63	6.83	5.25	21.93	10.65	3	3684	2.97	0.468	11.9	10	4	2017-10-31	2	2	0	0			- -
1770	2017-10-28 09:35	0	24	GnRH-agonist long protocol	18.75	primary	tubal	3	IVF	4.089	6.83	3.99	64.53	9.23	2	2947	1.78	0.25	10.6	11	2	2017-10-31	2	2	0	0			- -
1771	2017-10-31 09:55	0	30	GnRH-agonist long protocol	17.8	primary	Unexplained	3	IVF	NA	9.36	4.91	71.5	14.15	1	1365	2.7	0.36	11.2	12	2	2017-11-03	2	2	0	1	intrauterine pregnancy		2018-07-21	39	vaginal			female	2.95
1772	2017-11-02 09:50	0	25	GnRH-agonist long protocol	17.51	secondary	Endometriosis	1	IVF	1.33	4	5.4	34.65	20.29	2	2689	1.59	0.857	10.6	11	2	2017-11-05	2	2	0	1	intrauterine pregnancy		2018-07-18	39	Cesarean	male	3.9
1773	2017-11-02 09:30	0	31	GnRH-agonist long protocol	25.48	primary	Endometriosis	2	IVF	NA	7.25	5.37	30.12	11.83	4	4290	4.98	0.522	14.1	13	2	2017-11-05	2	2	0	1	intrauterine pregnancy		2018-06-25	35	Cesarean	male	2.4	female	2.55
1774	2017-11-03 09:30	0	35	GnRH-agonist long protocol	23.34	primary	tubal	4	IVF	0.77	7.71	3.36	25.24	16	1	1096	3.08	0.465	11.8	5	2	2017-11-06	2	2	0	1	intrauterine pregnancy		2018-07-28	40	vaginal	male	3.05
1775	2017-11-03 09:30	0	39	GnRH-agonist long protocol	16.64	secondary	Ovulatory	1	IVF	2.247	6.25	4.42	46	23.38	3	3140	2.97	1.02	8.4	10	2	2017-11-06	2	1	0	0			- -
1776	2017-11-03 09:40	0	26	GnRH-agonist long protocol	21.78	secondary	tubal	9	IVF	3.236	6.7	7.29	25.39	15.36	1	1927	1.76	0.742	12.9	12	2	2017-11-06	2	1	0	0			- -
1777	2017-11-03 10:00	0	24	GnRH-agonist long protocol	23.63	primary	male	1	ICSI	3.43	3.04	8.88	NA	15.08	2	2125	1.12	0.124	12.9	8	2	2017-11-06	2	2	0	1	intrauterine pregnancy		2018-07-18	38	Cesarean	male	3.45
1778	2017-11-04 08:40	1-2	34	GnRH-agonist long protocol	23.63	secondary	tubal	2	IVF	NA	4.53	7.21	85.23	19.12	2	2525	1.69	1.1	12.9	11	2	2017-11-07	2	2	0	0			- -
1779	2017-11-04 09:00	0	30	GnRH-agonist long protocol	18.37	secondary	Mixed	2	IVF	5.3	6.97	2.86	NA	19.84	1	1085	4.36	0.152	14.5	9	4	2017-11-07	2	1	0	1	intrauterine pregnancy		2018-07-04	36	Cesarean	male	2.35	female	2.49
1780	2017-11-04 09:15	0	38	GnRH-agonist long protocol	29.69	secondary	Ovulatory	2	IVF	3.782	6.09	2.46	18.33	9.48	2	2509	1.69	0.513	11.4	15	2	2017-11-07	2	2	0	1	intrauterine pregnancy		2018-07-05	37	Cesarean	male	2.8	male	2.35
1781	2017-11-05 09:03	0	37	GnRH-agonist long protocol	22.04	secondary	tubal	3	IVF	1.073	7.89	1.59	51.65	15.18	2	2295	2.02	0.544	12	13	2	2017-11-08	2	1	0	1	intrauterine pregnancy		2018-07-16	38	Cesarean	male	3.15
1782	2017-11-07 09:10	1-2	29	GnRH-agonist long protocol	18.52	secondary	male	1	IVF	1.93	6.61	5.34	72	20.82	2	2600	1.31	0.724	9.2	14	8	2017-11-10	2	1	0	1	intrauterine pregnancy		2018-07-31	40	vaginal			female	3.4
1783	2017-11-08 10:00	0	38	GnRH-agonist long protocol	25.07	secondary	Mixed	4	IVF	2.015	8.96	4.81	33.08	13.9	3	3100	2.82	0.441	10	8	2	2017-11-11	2	2	0	1	intrauterine pregnancy		2018-07-28	39	vaginal	male	3.2
1784	2017-11-08 11:40	0	29	GnRH-agonist long protocol	20.96	secondary	Endometriosis	1	IVF	3.413	7.48	6.22	61.21	16.25	3	3496	2.31	0.346	11.8	7	2	2017-11-11	2	2	0	1	intrauterine pregnancy		2018-07-11	37	Cesarean	male	3.1	male	2.5
1785	2017-11-09 09:45	0	31	GnRH-agonist long protocol	23.62	primary	Mixed	2	IVF	0.843	7.83	2.8	27.34	14.69	1	1592	1.54	0.266	10.9	9	2	2017-11-12	2	2	0	0			- -
1786	2017-11-09 09:25	0	33	GnRH-agonist long protocol	23.12	secondary	tubal	5	IVF	0.612	5.79	6.71	34.18	15.03	3	3560	3.03	0.506	8.6	15	2	2017-11-12	2	2	0	0			- -
1787	2017-11-09 08:45	0	29	GnRH-agonist long protocol	22.6	primary	tubal	3	IVF	2.293	6.9	4.22	29.59	15.27	3	3444	2.75	0.46	15.6	14	2	2017-11-12	2	2	0	1	intrauterine pregnancy		2018-08-01	40	vaginal			female	3.5
1788	2017-11-10 09:10	0	27	GnRH-agonist long protocol	21.3	primary	Endometriosis	5	IVF	5.024	9.79	4.43	34.16	16.07	1	1910	1.23	0.841	12.4	7	3	2017-11-13	2	1	0	0			- -
1789	2017-11-12 09:20	0	35	GnRH-agonist long protocol	22.03	secondary	male	2	IVF	2.514	3.06	4.23	34.4	20.03	1	593.6	1.89	0.158	11.3	3	2	2017-11-15	2	1	0	1	intrauterine pregnancy		2018-07-17	39	Cesarean	female	2.5	female	2
1790	2017-11-13 09:00	0	30	GnRH-agonist long protocol	21.77	primary	Mixed	4	IVF	2.333	9.48	4.54	48.9	19.63	1	1908	2.56	0.478	13.5	6	3	2017-11-16	2	2	0	1	intrauterine pregnancy		2018-07-25	38	vaginal	male	2.44
1791	2017-11-13 08:40	0	30	GnRH-agonist long protocol	20.31	secondary	tubal	2	IVF	4.045	3.58	5.41	60.05	17.73	2	2068	3.82	0.863	9.5	6	2	2017-11-16	2	1	0	1	intrauterine pregnancy		2018-07-20	38	vaginal	male	3.25
1792	2017-11-14 10:00	0	25	GnRH-agonist long protocol	20.76	primary	male	2	ICSI	1.576	9.3	4.25	10.3	15.34	3	3034	2.12	0.454	17	14	2	2017-11-17	2	2	0	1	intrauterine pregnancy		2018-07-02	35	Cesarean	male	2.75	female	2.25
1793	2017-11-16 09:45	0	33	GnRH-agonist long protocol	18.13	primary	tubal	0	IVF	NA	9.32	8.22	31.11	19.49	2	2227	1.48	0.52	15.4	8	2	2017-11-19	2	1	0	1	intrauterine pregnancy		2018-08-08	40	Cesarean	male	3.25
1794	2017-11-17 08:50	0	30	GnRH-agonist long protocol	18.75	secondary	tubal	2	IVF	3.277	1.87	2.12	44.61	16.24	2	2476	1.6	0.379	10.3	10	4	2017-11-20	2	2	0	0			- -
1795	2017-11-21 09:45	0	36	GnRH-agonist long protocol	21.36	primary	Mixed	6	IVF	1.603	7.72	7.61	14.51	12.1	2	2933	1.93	0.494	10.7	8	3	2017-11-24	2	1	0	0			- -
1796	2017-11-21 09:00	0	39	GnRH-agonist long protocol	19.72	secondary	tubal	1	IVF	1.45	4.472	7.715	NA	18.9	2	2998	1.41	1.25	12.5	7	2	2017-11-24	2	1	0	1	intrauterine pregnancy	yes	- -
1797	2017-11-21 09:25	0	36	GnRH-agonist long protocol	20.96	secondary	tubal	1	IVF	3.864	4.56	7.37	37.32	14.74	3	3270	2.24	0.421	12.2	15	2	2017-11-24	2	2	0	1	intrauterine pregnancy		2018-07-23	36	Cesarean	male	2.45	female	2.4
1798	2017-11-23 09:25	0	30	GnRH-agonist long protocol	41.86	secondary	tubal	2	IVF	2.892	7.36	4.58	13.08	15.63	1	1453	1.85	0.857	9.9	6	2	2017-11-26	2	1	0	1	intrauterine pregnancy		2018-08-28	41	Cesarean			female	3.35
1799	2017-11-23 09:00	0	29	GnRH-agonist long protocol	22.67	primary	male	6	ICSI	4.263	7.29	3.27	39.59	11.82	3	3744	2.1	0.32	13.5	13	2	2017-11-26	2	2	0	0			- -
1800	2017-11-24 09:45	0	34	GnRH-agonist long protocol	26.95	secondary	male	2	ICSI	1.23	4.09	3.01	NA	17.84	1	1141	1.78	0.138	11	7	2	2017-11-27	2	2	0	0			- -
1801	2017-11-24 10:00	1-2	34	GnRH-agonist long protocol	23.44	primary	Endometriosis	10	ICSI	0.563	1.41	3.95	7.85	20.08	2	2160	3.24	0.698	12.5	6	2	2017-11-27	2	1	0	0			- -
1802	2017-11-26 10:25	0	24	GnRH-agonist long protocol	20.7	primary	tubal	3	IVF	NA	8.01	5.51	16.1	17.2	2	2820	1.86	0.489	12.4	13	2	2017-11-29	2	2	0	0			- -
1803	2017-11-27 09:40	0	34	GnRH-agonist long protocol	18.07	primary	tubal	2	IVF	1.9	7.75	7.59	34.86	16.41	1	1787	3.48	0.459	8.2	4	3	2017-11-30	2	1	0	1	intrauterine pregnancy		2018-08-17	40	Cesarean	male	3.25
1804	2017-11-28 09:30	0	42	GnRH-agonist long protocol	20	secondary	tubal	1	IVF	3.611	5.81	3.03	24.46	25.69	2	2309	0.925	0.508	10.9	10	4	2017-12-01	2	1	0	0			- -
1805	2017-11-28 10:00	0	33	GnRH-agonist long protocol	18.37	primary	tubal	3	IVF	4.834	6.37	8.31	11.24	13.12	3	3012	2.13	0.848	11.1	17	2	2017-12-01	2	2	0	0			- -
1806	2017-11-29 09:00	0	32	GnRH-agonist long protocol	18.9	primary	male	1	ICSI	4.309	9.23	4.75	47.75	18.85	2	2066	2.85	0.754	11	11	2	2017-12-02	2	2	0	0			- -
1807	2017-12-01 08:45	1-2	32	GnRH-agonist long protocol	24.61	secondary	Mixed	1	IVF	NA	5.71	2.24	22.41	12.87	1	1244	1.39	0.276	11.3	7	2	2017-12-04	2	1	0	0			- -
1808	2017-12-01 09:15	0	33	GnRH-agonist long protocol	21.34	primary	male	1	IVF	1.583	5.28	4.03	76.68	20.98	3	3248	1.43	0.818	8.7	11	2	2017-12-04	2	2	0	1	intrauterine pregnancy		2018-08-25	40	vaginal	male	3.25
1809	2017-12-01 09:45	0	31	GnRH-agonist long protocol	27.34	primary	tubal	8	IVF	3.497	1.9	6.12	26.77	16.15	1	1460	1.06	0.597	13	10	4	2017-12-04	2	2	0	1	intrauterine pregnancy	yes	- -
1810	2017-12-02 09:30	0	39	GnRH-agonist long protocol	26.29	secondary	tubal	7	IVF	3.283	8.46	4.74	22.22	8.36	2	2064	3.26	0.258	10	5	2	2017-12-05	2	2	0	1	intrauterine pregnancy		2018-08-16	38	Cesarean			female	3.3
1811	2017-12-03 09:05	0	26	GnRH-agonist long protocol	20.96	secondary	tubal	3	IVF	4.623	5.25	2.79	53.36	15.45	2	2425	1.48	0.841	10	8	2	2017-12-06	2	2	0	1	intrauterine pregnancy		2018-08-13	38	vaginal	male	3.55
1812	2017-12-03 09:35	0	44	GnRH-agonist long protocol	21.36	secondary	Mixed	3	IVF	0.648	3.65	8.82	53.94	17.96	1	1737	3.32	0.153	13.4	7	4	2017-12-06	2	2	0	0			- -
1813	2017-12-03 10:25	0	41	GnRH-agonist long protocol	22.03	secondary	male	1	ICSI	1.138	6.5	3.68	79.99	13.03	2	2748	2.22	0.535	12.7	14	4	2017-12-06	2	2	0	0			- -
1814	2017-12-04 10:00	0	29	GnRH-agonist long protocol	21.51	primary	male	1	ICSI	6.467	5.96	4.43	21.12	10.02	3	3724	3.15	0.54	13.9	15	2	2017-12-07	2	2	0	1	intrauterine pregnancy		2018-07-25	35	vaginal	female	2.2	female	2.3
1815	2017-12-05 08:45	1-2	38	GnRH-agonist long protocol	24.14	secondary	Mixed	2	IVF	NA	7.79	3.27	38.6	15.01	1	522.9	0.527	0.273	9.6	2	2	2017-12-08	2	1	0	1	intrauterine pregnancy		2018-08-14	38	Cesarean	male	3.55
1816	2017-12-05 10:20	0	31	GnRH-agonist long protocol	17.48	secondary	Mixed	4	IVF	NA	9.9	2.84	28.37	20.48	2	2112	2.14	0.846	11	16	1	2017-12-08	1	1	0	0			- -
1817	2017-12-08 09:00	0	35	GnRH-agonist long protocol	28.44	secondary	Endometriosis	10	IVF	2.055	7.05	6.4	29.21	8.13	2	2980	1.6	0.415	9.6	17	2	2017-12-11	2	2	0	0			- -
1818	2017-12-08 09:35	1-2	26	GnRH-agonist long protocol	24.65	primary	male	5	ICSI	NA	7.01	6.76	12.26	15.6	1	1661	16.07	0.645	10.5	7	4	2017-12-11	2	2	0	1	intrauterine pregnancy		2018-09-06	40	vaginal	male	3.2
1819	2017-12-08 09:50	0	29	GnRH-agonist long protocol	19.23	primary	male	2	ICSI	1.953	8.66	4.67	64.15	28.94	2	2507	1.83	0.956	11	9	4	2017-12-11	2	1	0	1	intrauterine pregnancy		2018-08-13	37	Cesarean			female	2.09
1820	2017-12-09 10:15	0	26	GnRH-agonist long protocol	20.81	secondary	Endometriosis	1	IVF	4.04	4.69	2.73	10.72	12.31	2	2927	2.31	0.392	13.7	18	2	2017-12-12	2	2	0	0			- -
1821	2017-12-10 09:10	0	25	GnRH-agonist long protocol	23.34	primary	tubal	2	IVF	2.17	3	7.33	46.38	16.21	3	3160	1.59	0.676	10.5	22	2	2017-12-13	2	2	0	0			- -
1822	2017-12-10 09:00	0	40	GnRH-agonist long protocol	22.35	secondary	tubal	1	IVF	3.465	7.24	3.5	37.1	13.75	2	2506	1.94	0.815	13.3	15	2	2017-12-13	2	2	0	0			- -
1823	2017-12-10 09:50	0	45	GnRH-agonist long protocol	20.81	primary	Unexplained	0	IVF	0.42	6.96	6.07	13	21.27	1	1016	1.35	0.329	10.9	6	5	2017-12-13	2	1	0	0			- -
1824	2017-12-12 09:00	≥3	38	GnRH-agonist long protocol	21.36	secondary	tubal	3	IVF	5.979	3.71	6.31	34.26	15.31	1	1364	1.97	0.907	9.1	9	2	2017-12-15	2	2	0	0			- -
1825	2017-12-13 10:10	0	37	GnRH-agonist long protocol	22.21	secondary	male	4	IVF	2.075	8.09	3.46	6.46	19.81	3	3750	1	1.21	8.2	17	2	2017-12-16	2	2	0	0			- -
1826	2017-12-15 10:45	1-2	36	GnRH-agonist long protocol	23.83	secondary	tubal	7	IVF	4.343	8.12	3.47	27.84	16.48	2	2191	3.55	0.281	10.5	9	1	2017-12-18	1	1	0	0			- -
1827	2017-12-16 09:45	0	25	GnRH-agonist long protocol	18.37	secondary	tubal	1	IVF	3.519	5.43	3.76	32.06	18.51	1	1574	1.4	0.326	13.5	10	1	2017-12-19	1	1	0	0			- -
1828	2017-12-16 10:00	0	40	GnRH-agonist long protocol	22.68	secondary	tubal	2	IVF	2.03	6.94	3.58	64.18	17.4	1	1621	1.59	0.14	7.6	9	1	2017-12-19	1	1	0	0			- -
1829	2017-12-16 10:20	0	33	GnRH-agonist long protocol	22.04	primary	male	3	IVF	3.429	3.22	4.04	34.29	11.28	1	1643	3.11	0.167	14.6	7	3	2017-12-19	2	2	0	1	intrauterine pregnancy		2018-08-16	37	Cesarean	female	2.3	female	2.45
1830	2017-12-17 08:55	1-2	39	GnRH-agonist long protocol	20.5	primary	male	0	IVF	1.03	6.38	0.88	33.43	25.76	1	889.3	1.49	0.394	12.5	3	2	2017-12-20	2	1	0	0			- -
1831	2017-12-17 09:25	0	34	GnRH-agonist long protocol	22.31	secondary	male	0	IVF	5.95	6.54	6.65	88.28	13.83	2	2530	1.99	0.434	8.5	7	2	2017-12-20	2	2	0	1	intrauterine pregnancy		2018-08-21	37	Cesarean			female	2.85
1832	2017-12-17 09:45	0	27	GnRH-agonist long protocol	20.96	primary	male	1	ICSI	3.817	7.53	8.06	45.15	11.62	3	3024	4.48	0.225	11	14	2	2017-12-20	2	2	0	1	intrauterine pregnancy		2018-09-14	40	Cesarean			female	3
1833	2017-12-18 10:20	0	31	GnRH-agonist long protocol	33.2	secondary	tubal	1	IVF	3.373	6.61	1.58	10.15	11.31	2	2400	1.88	0.581	11.6	15	2	2017-12-21	2	2	0	0			- -
1834	2017-12-19 09:10	0	29	GnRH-agonist long protocol	21.63	secondary	Mixed	3	IVF	10.914	6.74	2.33	21.09	12.69	1	1822	1.37	0.218	9.6	9	2	2017-12-22	2	2	0	0			- -
1835	2017-12-19 10:00	0	36	GnRH-agonist long protocol	22.19	secondary	tubal	2	IVF	2.838	9.57	4.75	38.5	17.84	4	4524	1.74	0.695	9.1	8	2	2017-12-22	2	2	0	0			- -
1836	2017-12-19 11:33	0	36	GnRH-agonist long protocol	20.28	primary	tubal	0	IVF	2.84	7.85	6.68	40.05	18.56	2	2221	2.02	0.456	13.2	7	2	2017-12-22	2	2	0	1	intrauterine pregnancy		2018-09-12	40	Cesarean	male	2.9
1837	2017-12-20 09:30	0	26	GnRH-agonist long protocol	21.6	primary	male	2	IVF	7.406	8.28	5.9	38.02	10.67	3	3798	3.95	0.664	12	13	4	2017-12-23	2	2	0	1	intrauterine pregnancy		2018-08-23	37	Cesarean	female	2.8	female	3
1838	2017-12-20 09:50	0	32	GnRH-agonist long protocol	27.06	primary	tubal	1	IVF	4.423	4.641	4.257	28.614	15.55	3	3192	1.58	0.617	9.3	14	2	2017-12-23	2	2	0	0			- -
1839	2017-12-21 10:20	0	35	GnRH-agonist long protocol	21.34	primary	male	7	ICSI	3.189	8.71	6.62	28.2	14.44	2	2866	3.78	0.554	12.6	12	2	2017-12-24	2	2	0	1	intrauterine pregnancy		2018-08-28	38	Cesarean	male	2.8	female	2.7
1840	2017-12-26 09:25	0	35	GnRH-agonist long protocol	23.01	primary	Unexplained	4	IVF	4.164	7.5	6.35	29.8	9.36	4	4848	1.51	0.748	10.5	12	2	2017-12-29	2	2	0	1	intrauterine pregnancy		2018-10-01	41	Cesarean			female	3.2
1841	2017-12-26 09:50	0	38	GnRH-agonist long protocol	24.44	primary	tubal	6	IVF	1.619	7.6	4.26	39.11	15.83	1	714.3	2.44	0.23	18.2	3	1	2017-12-29	1	1	0	0			- -
1842	2017-12-27 10:40	0	27	GnRH-agonist long protocol	20.03	primary	male	1	ICSI	4.923	6.26	4.84	33.59	13.01	2	2965	2.7	0.517	10.6	14	2	2017-12-30	2	2	0	1	intrauterine pregnancy		2018-09-21	40	vaginal			female	3.15
1843	2017-12-28 09:55	0	34	GnRH-agonist long protocol	18.07	secondary	tubal	0	IVF	1.506	6.44	4.27	89.1	33.75	1	1355	1.7	0.147	11.6	6	5	2017-12-31	2	1	0	0			- -
1844	2017-12-28 10:05	1-2	32	GnRH-agonist long protocol	20.43	secondary	male	2	ICSI	NA	7.14	6.03	67.6	20.5	3	3138	2.43	0.521	10.5	6	4	2017-12-31	2	2	0	1	intrauterine pregnancy		2018-09-24	40	Cesarean			female	3.2
1845	2017-12-29 09:15	0	43	GnRH-agonist long protocol	23.73	secondary	Mixed	3	IVF	2.778	7.51	3.39	15.48	12.14	2	2024	1.35	0.446	8.1	11	2	2018-01-01	2	2	0	0			- -
1846	2017-12-31 09:25	0	34	GnRH-agonist long protocol	26.4	primary	male	8	IVF	3.96	3.02	2.57	32.49	11.27	1	1938	2.19	0.381	10.9	12	2	2018-01-03	2	2	0	0			- -
1847	2018-01-09 08:30	0	27	GnRH-agonist long protocol	18.37	primary	Ovulatory	5	IVF	7.254	4.23	4.89	49.95	10.51	4	4488	1.1	1.47	8	17	2	2018-01-12	2	1	0	1	intrauterine pregnancy		2018-09-02	35	Cesarean	male	2.15
1848	2018-01-06 08:30	0	30	GnRH-agonist long protocol	19.98	secondary	tubal	2	IVF	NA	4.07	1.51	5	14.35	2	2506	2.29	0.365	11.9	7	4	2018-01-09	2	1	0	1	intrauterine pregnancy		2018-09-22	38	vaginal	male	2.9
1849	2018-01-09 09:10	0	39	GnRH-agonist long protocol	23.05	secondary	tubal	6	IVF	3.01	3.58	2.17	35.04	12.9	2	2378	4.01	0.428	10.9	7	3	2018-01-12	2	1	0	1	intrauterine pregnancy		2018-09-20	38	Cesarean	male	3.3
1850	2018-01-09 09:40	0	37	GnRH-agonist long protocol	18.13	secondary	male	4	ICSI	2.701	2.59	8.09	20.74	19	2	2249	4.12	0.77	7	11	2	2018-01-12	2	1	0	0			- -
1851	2018-01-12 09:15	0	39	GnRH-agonist long protocol	25.48	primary	tubal	5	IVF	1.768	6.12	3.95	21.98	15.14	4	4210	4.32	0.191	8.3	12	4	2018-01-15	2	2	0	0			- -
1852	2018-01-16 09:20	0	33	GnRH-agonist long protocol	21.34	primary	Endometriosis	5	IVF	2.624	5.21	4.97	60.59	15.82	3	3014	2.26	0.483	7.4	13	3	2018-01-19	2	1	0	1	heterotopic pregnancy		2018-10-17	41	vaginal			female	3.4
1853	2018-01-25 10:40	0	35	GnRH-agonist long protocol	23.23	primary	Endometriosis	7	IVF	3.297	7.65	5.31	29.32	15.65	3	3240	0.857	0.531	8.8	12	2	2018-01-28	2	2	0	1	intrauterine pregnancy		2018-10-08	39	vaginal	male	3.45
1854	2018-01-25 10:30	0	27	GnRH-agonist long protocol	23.44	primary	male	2	ICSI	0.88	8.32	4.88	14.95	13.68	2	2233	2.08	0.578	11.3	6	2	2018-01-28	2	2	0	1	intrauterine pregnancy		2018-09-27	37	Cesarean	male	2.55	male	2.6
1855	2018-01-28 09:40	0	33	GnRH-agonist long protocol	21.36	primary	Mixed	4	ICSI	2.102	5.06	2.07	26.3	13.16	1	1058	2.04	0.484	10.7	7	2	2018-01-31	2	1	0	0			- -
1856	2018-01-29 09:10	0	30	GnRH-agonist long protocol	19.26	primary	Unexplained	2	IVF	0.91	5.93	3.32	28.6	18.39	1	1468	1.33	0.879	12.3	10	4	2018-02-01	2	2	0	0			- -
1857	2018-01-30 09:50	0	34	GnRH-agonist long protocol	19.1	primary	tubal	4	IVF	1.622	9.13	5.46	38.77	20.55	2	2736	2.05	0.651	12.7	11	2	2018-02-02	2	2	0	1	intrauterine pregnancy	yes	- -
1858	2018-01-30 10:25	1-2	44	GnRH-agonist long protocol	22.58	secondary	Endometriosis	1	IVF	1.112	5.48	3.91	49	20.57	3	3010	6.67	0.978	10.4	7	4	2018-02-02	2	2	0	0			- -
1859	2018-02-03 09:50	0	29	GnRH-agonist long protocol	19.83	secondary	tubal	2	IVF	8.034	7.23	5.57	32.54	13.37	3	3705	2.61	0.73	11.5	11	2	2018-02-06	2	2	0	1	intrauterine pregnancy		2018-10-01	36	Cesarean	male	2.75	male	3
1860	2018-03-10 09:00	1-2	28	GnRH-agonist long protocol	18.34	secondary	male	2	IVF	5.681	4.92	2.39	42.77	11.67	1	1151	1.02	0.258	12.5	14	4	2018-03-13	2	2	0	1	intrauterine pregnancy		2018-11-28	39	Cesarean			female	3.1
1861	2018-03-23 09:15	0	28	GnRH-agonist long protocol	22.03	secondary	tubal	1	IVF	3.008	7.04	8.03	45.53	10.34	2	2948	0.637	0.38	15.8	19	2	2018-03-26	2	2	0	1	intrauterine pregnancy		2018-11-26	37	Cesarean	female	2.85		2.8
1862	2018-03-21 09:30	0	27	GnRH-agonist long protocol	21.88	primary	Endometriosis	1	IVF	2.35	7.5	3.91	29.7	15.84	1	1346	0.72	0.612	13.8	4	3	2018-03-24	2	2	0	1	intrauterine pregnancy		2018-11-16	36	Cesarean	male	1.8	female	2.3
1863	2018-03-22 09:00	0	34	GnRH-agonist long protocol	19.2	secondary	Unexplained	4	IVF	2.047	7.54	4.54	55.87	17.84	3	3730	1.9	0.819	11.7	12	5	2018-03-25	2	2	0	1	intrauterine pregnancy		2018-12-11	39	vaginal	male	3.1
1864	2018-03-23 09:25	1-2	38	GnRH-agonist long protocol	20.31	primary	tubal	2	IVF	NA	6	3.1	34.9	14.52	3	3116	1.42	0.958	9.4	10	2	2018-03-26	2	2	0	1	intrauterine pregnancy	yes	- -
1865	2018-03-24 09:20	0	43	GnRH-agonist long protocol	24.65	secondary	tubal	2	IVF	3.217	3.17	3.44	34.33	16.88	4	4548	2.41	0.651	8.8	14	3	2018-03-27	1	1	0	0			- -
1866	2018-03-27 08:30	0	36	GnRH-agonist long protocol	17.48	secondary	Endometriosis	7	IVF	1.317	7.67	2.27	40.05	24.1	1	519	1.58	0.223	9.5	2	2	2018-03-30	2	2	0	1	intrauterine pregnancy		2018-12-08	38	Cesarean	female	2.55		2.7
1867	2018-03-27 08:43	0	32	GnRH-agonist long protocol	19.23	secondary	tubal	3	IVF	1.751	4.92	3.65	60.95	1.66	3	3396	17.83	1.18	11.6	18	2	2018-03-30	2	2	0	1	intrauterine pregnancy		2018-12-28	41	vaginal			female	2.8
1868	2018-03-27 09:51	0	33	GnRH-agonist long protocol	24.77	primary	Endometriosis	0	IVF	2.725	8.17	3.95	42.92	18.09	1	1558	2.62	0.462	19.8	9	2	2018-03-30	2	1	0	0			- -
1869	2018-03-27 10:02	0	32	GnRH-agonist long protocol	18.97	secondary	tubal	2	IVF	1.891	6.78	4.52	28.57	12.68	1	1616	2.01	0.325	11.9	8	2	2018-03-30	2	1	0	1	intrauterine pregnancy		2018-12-15	39	Cesarean	male	3.43
1870	2018-03-29 09:20	0	30	GnRH-agonist long protocol	17.22	secondary	male	0	ICSI	3.546	2.5	2.69	6.02	19.55	4	4384	2.7	0.624	11.4	12	2	2018-04-01	2	2	0	1	intrauterine pregnancy		2018-12-10	38	Cesarean	male	2.4	female	2.6
1871	2018-03-30 09:20	0	30	GnRH-agonist long protocol	19.53	secondary	tubal	6	IVF	1.719	5.86	3.78	38.98	16.49	4	4186	1.81	0.992	12.1	17	2	2018-04-02	2	2	0	0			- -
1872	2018-04-01 09:05	0	32	GnRH-agonist long protocol	22.31	secondary	tubal	2	IVF	4.779	4.68	4.47	31	8.45	2	2187	2.04	0.599	13	10	2	2018-04-04	2	2	0	0			- -
1873	2018-04-02 08:55	1-2	33	GnRH-agonist long protocol	26.35	primary	male	7	ICSI	2.325	9.02	4.04	27.81	13.73	1	1022	2.07	0.383	11.2	8	4	2018-04-05	2	1	0	0			- -
1874	2018-04-06 10:05	0	27	GnRH-agonist long protocol	19.23	primary	male	2	ICSI	3.351	7.24	3.56	37.26	17.02	2	2012	4.24	0.314	12.1	10	2	2018-04-09	2	2	0	1	intrauterine pregnancy		2018-12-16	38	vaginal			female	3.25
1875	2018-04-08 08:40	1-2	31	GnRH-agonist long protocol	17.63	primary	male	2	ICSI	1.495	6.07	7.08	6.95	23.64	1	1458	3.55	0.903	10.4	5	4	2018-04-11	2	1	0	1	intrauterine pregnancy		2018-12-27	40	vaginal			female	3.3
1876	2018-04-08 10:10	1-2	40	GnRH-agonist long protocol	20.78	secondary	Ovulatory	1	IVF	0.282	8.54	4.97	23.04	30.3	1	1380	9.4	0.46	14.9	4	4	2018-04-11	2	2	0	1	intrauterine pregnancy	yes	- -
1877	2018-04-10 09:13	1-2	39	GnRH-agonist long protocol	24.24	secondary	tubal	2	IVF	0.319	8.37	4.37	28.83	15.26	1	1215	2.32	0.737	20.9	5	3	2018-04-13	2	2	0	1	intrauterine pregnancy		2018-12-19	37	Cesarean			female	3.2
1878	2018-04-10 09:35	0	43	GnRH-agonist long protocol	20.55	secondary	Mixed	8	IVF	3.868	6.86	3.66	16.62	14.09	2	2181	3.89	0.516	11.3	12	2	2018-04-13	2	2	0	0			- -
1879	2018-04-12 09:25	0	30	GnRH-agonist long protocol	19.92	primary	male	3	ICSI	3.746	9.37	4.99	26.6	18.39	4	4141	2.28	0.945	11.6	15	2	2018-04-15	2	2	0	1	intrauterine pregnancy		2019-01-02	39	vaginal			female	3.1
1880	2018-04-13 09:06	0	31	GnRH-agonist long protocol	19.3	primary	male	8	IVF	1.674	7.53	5.22	56.81	19.68	1	1474	3.33	0.533	12	9	4	2018-04-16	2	2	0	1	intrauterine pregnancy		2018-12-31	39	vaginal			female	2.67
1881	2018-04-16 10:30	0	33	GnRH-agonist long protocol	20.55	primary	male	12	ICSI	6.64	6.79	6.91	35.33	18.24	1	1906	3.22	0.303	2	6	3	2018-04-19	2	1	0	1	intrauterine pregnancy		2019-01-04	39	Cesarean	male	3.25
1882	2018-04-13 10:05	0	34	GnRH-agonist long protocol	25.86	primary	tubal	5	IVF	2.51	3.41	2.2	NA	11.26	1	1660	2.55	0.499	11.4	20	2	2018-04-16	2	2	0	1	intrauterine pregnancy		2018-12-10	36	Cesarean			female	2.5
1883	2018-04-14 09:40	0	29	GnRH-agonist long protocol	22.03	secondary	tubal	4	IVF	1.06	6.18	1.86	21.71	NA	1	1008	0.71	0.884	8.3	7	2	2018-04-17	2	2	0	0			- -
1884	2018-04-14 09:50	≥3	37	GnRH-agonist long protocol	19.72	secondary	tubal	4	IVF	0.469	6.38	3.72	47.13	13.3	1	1150	1.63	0.244	8.7	8	4	2018-04-17	2	2	0	0			- -
1885	2018-04-15 10:23	0	23	GnRH-agonist long protocol	27.24	secondary	male	2	ICSI	1.724	4.31	2.58	50	8.06	1	1496	1.5	0.39	10.9	12	2	2018-04-18	2	2	0	0			- -
1886	2018-04-15 10:03	0	38	GnRH-agonist long protocol	22.51	primary	tubal	7	IVF	3.126	9.74	7.5	31.33	NA	4	4167	1.16	0.865	12.1	10	2	2018-04-18	2	2	0	1	intrauterine pregnancy	yes	- -
1887	2018-04-17 10:50	0	23	GnRH-agonist long protocol	17.96	secondary	tubal	2	IVF	6.252	7.7	5.76	34.18	7.9	3	3010	3.08	0.284	8.6	13	2	2018-04-20	2	2	0	1	intrauterine pregnancy		2018-12-15	36	Cesarean	female	2.3		2.05
1888	2018-04-18 09:50	0	34	GnRH-agonist long protocol	20.96	secondary	tubal	1	IVF	2.93	5.12	3.96	57.22	18.06	3	3885	2.24	0.625	11.7	11	2	2018-04-21	2	2	0	0			- -
1889	2018-04-18 10:10	0	30	GnRH-agonist long protocol	20.2	primary	tubal	8	IVF	7.768	6.93	7.76	18.69	12.89	3	3002	4.85	0.708	11.7	12	4	2018-04-21	2	1	0	1	intrauterine pregnancy		2018-12-27	38	vaginal	male	3.45
1890	2018-04-19 09:50	0	26	GnRH-agonist long protocol	23.23	secondary	tubal	3	IVF	1.51	6.45	6.94	30.38	14.25	3	3006	3.08	0.644	7.3	19	2	2018-04-22	2	1	0	0			- -
1891	2018-04-22 09:10	0	35	GnRH-agonist long protocol	16.65	primary	Mixed	2	IVF	0.927	4.29	5.45	40.05	22.71	1	879.1	2.38	0.185	11	2	1	2018-04-25	1	1	0	0			- -
1892	2018-04-24 10:30	0	28	GnRH-agonist long protocol	17.91	primary	male	5	IVF	3.178	2.92	5.26	45.18	14.82	1	1948	2.19	0.553	13.2	13	2	2018-04-27	2	1	0	1	intrauterine pregnancy		2019-01-04	38	vaginal	male	3.3
1893	2018-04-26 10:10	0	29	GnRH-agonist long protocol	23.07	primary	male	3	ICSI	3.731	8.39	8.3	27.77	14.62	4	4646	2.49	0.278	13.1	8	2	2018-04-29	2	1	0	1	intrauterine pregnancy		2018-12-20	36	Cesarean	male	2.3
1894	2018-04-28 09:20	0	32	GnRH-agonist long protocol	18.8	secondary	Mixed	1	IVF	3.929	6	3.36	66.7	12.91	2	2118	0.539	0.192	10.1	7	2	2018-05-01	2	1	0	1	intrauterine pregnancy		2019-12-26	36	vaginal	male	2.75
1895	2018-05-01 09:00	0	30	GnRH-agonist long protocol	20.57	primary	male	2	IVF	2.262	5.28	5.82	52.25	12.87	3	3184	1.4	0.398	12.1	6	2	2018-05-04	2	2	0	1	intrauterine pregnancy		2019-01-19	39	vaginal			female	2.95
1896	2018-05-02 10:20	0	29	GnRH-agonist long protocol	20.55	secondary	tubal	3	IVF	3.529	7.93	6.14	24.37	15.6	2	2154	3.54	0.344	12.3	12	2	2018-05-05	2	2	0	1	intrauterine pregnancy		2019-01-22	39	vaginal			female	3.3
1897	2018-05-03 08:55	0	30	GnRH-agonist long protocol	18.18	secondary	male	4	ICSI	1.865	5.87	7.48	50.77	NA		NA	NA	NA	NA	13	2	2018-05-06	2	2	0	0			- -
1898	2018-05-04 09:15	0	33	GnRH-agonist long protocol	18.73	secondary	tubal	4	IVF	3.84	6.31	5.36	24.96	15.74	3	3622	2.22	0.634	11.4	15	2	2018-05-07	2	2	0	1	intrauterine pregnancy		2018-12-27	35	Cesarean	female	2		2.1
1899	2018-05-08 08:30	0	32	GnRH-agonist long protocol	23.31	secondary	tubal	5	IVF	1.216	3.21	8.44	40.71	15.73	1	1465	1.24	0.776	8.7	10	4	2018-05-11	2	1	0	1	intrauterine pregnancy	yes	- -
1900	2018-05-11 10:10	0	25	GnRH-agonist long protocol	24.17	primary	tubal	3	IVF	3.694	2.11	7.44	NA	13.16	2	2253	2.05	0.544	14	12	2	2018-05-14	2	2	0	1	intrauterine pregnancy		2019-01-28	39	Cesarean	male	3	female	3
1901	2018-05-13 09:30	0	32	GnRH-agonist long protocol	20.66	secondary	Endometriosis	1	IVF	4.833	6.7	3.79	17.87	11.55	3	3006	6.32	0.967	17	10	2	2018-05-16	2	2	0	1	intrauterine pregnancy		2019-01-28	38	vaginal	male	3.13
1902	2018-05-14 10:00	1-2	36	GnRH-agonist long protocol	30.12	secondary	tubal	5	IVF	0.856	2.13	3.17	7.73	13.3	2	2272	1.35	0.76	15.6	3	2	2018-05-17	1	1	0	1	intrauterine pregnancy		- -
1903	2018-05-16 08:30	1-2	24	GnRH-agonist long protocol	23.23	secondary	Mixed	3	IVF	3.85	8.46	5.99	12.65	14.24	1	1656	1.79	0.456	11.6	7	2	2018-05-19	2	2	0	1	intrauterine pregnancy		2019-01-21	37	Cesarean			female	2.3
1904	2018-05-16 08:30	0	34	GnRH-agonist long protocol	NA	secondary	tubal	1	IVF	1.471	6.82	5.7	38.66	19.17	2	2030	1.32	0.458	11.6	6	2	2018-05-19	2	2	0	1	intrauterine pregnancy		2019-12-25	37	Cesarean	male	3.4
1905	2018-05-16 09:30	0	26	GnRH-agonist long protocol	20.2	primary	tubal	1	IVF	3.516	6.08	3.03	55.19	12.85	3	3620	2.51	0.443	13.3	6	4	2018-05-19	2	1	0	1	intrauterine pregnancy		2019-02-02	39	Cesarean			female	3
1906	2018-05-17 09:10	0	33	GnRH-agonist long protocol	17.78	secondary	tubal	10	IVF	1.42	5.67	2.46	36	20.62	2	2099	1.12	0.336	9.4	6	3	2018-05-20	2	1	0	1	intrauterine pregnancy		2019-02-11	40	Cesarean	male	3.4
1907	2018-05-18 09:15	0	31	GnRH-agonist long protocol	19.81	secondary	tubal	2	IVF	3.479	5.55	6.26	26.8	22.6	1	1602	3.47	0.587	11.8	8	2	2018-05-21	2	1	0	1	intrauterine pregnancy		2019-01-28	38	vaginal			female	3.2
1908	2018-05-18 10:10	0	28	GnRH-agonist long protocol	24.39	primary	Endometriosis	2	IVF	2.264	6.28	7.74	31.07	13.11	2	2570	3.19	0.509	13.7	16	2	2018-05-21	2	2	0	0			- -
1909	2018-05-20 10:25	0	32	GnRH-agonist long protocol	23.14	secondary	tubal	1	IVF	1.405	9	4.89	24.38	16.82	1	1680	1.39	0.511	10.7	9	2	2018-05-23	2	1	0	1	intrauterine pregnancy		2019-01-04	34	Cesarean	male	1.9	male	1.75
1910	2018-05-22 09:10	0	33	GnRH-agonist long protocol	22.48	secondary	tubal	3	IVF	1.392	8.61	4.89	31.69	16.02	1	1513	1.22	0.556	17.2	11	2	2018-05-25	2	2	0	0			- -
1911	2018-05-22 09:20	0	36	GnRH-agonist long protocol	19.23	secondary	tubal	2	IVF	2.08	7.26	5.02	31.57	17.03	1	1372	1.3	0.269	10.8	4	4	2018-05-25	2	1	0	1	intrauterine pregnancy		2019-02-08	39	Cesarean	male	3.5
1912	2018-05-22 09:35	0	31	GnRH-agonist long protocol	21.27	secondary	male	2	IVF	2.412	8.9	6.1	55.19	17.69	4	4458	3.43	0.475	10	8	2	2018-05-25	2	2	0	1	intrauterine pregnancy		2019-02-06	38	vaginal	male	3.2
1913	2018-05-26 09:45	0	28	GnRH-agonist long protocol	24.84	primary	tubal	2	IVF	2.023	6.94	6.24	38.21	13.93	1	1713	1.15	0.524	13.9	12	2	2018-05-29	2	2	0	1	intrauterine pregnancy		2019-01-02	32	Cesarean	male	1.76	female	1.76
1914	2018-05-28 09:15	0	31	GnRH-agonist long protocol	18	primary	male	2	IVF	NA	8.61	8.71	29.57	16.39	1	1799	3.27	0.2	10.6	7	2	2018-05-31	2	1	0	1	intrauterine pregnancy		2019-12-25	37	Cesarean	male	2.8	male	2.65
1915	2018-06-01 08:50	0	40	GnRH-agonist long protocol	23.03	secondary	Endometriosis	2	IVF	2.31	7.51	4.69	40.03	18.97	1	1180	1.573	0.447	13.3	11	2	2018-06-04	2	1	0	1	intrauterine pregnancy	yes	- -
1916	2018-06-03 09:45	0	26	GnRH-agonist long protocol	17.69	primary	male	1	ICSI	2.482	6.09	6.66	35.85	15.24	1	1964	1.87	0.534	11.8	11	2	2018-06-06	2	2	0	0			- -
1917	2018-06-03 09:40	0	31	GnRH-agonist long protocol	22.38	primary	tubal	3	IVF	2.697	7.64	8.9	23.06	18.62	3	3738	2.06	0.627	NA	13	2	2018-06-06	2	2	0	1	intrauterine pregnancy		2019-02-15	38	Cesarean			female	2.7
1918	2018-06-06 09:15	0	34	GnRH-agonist long protocol	24.41	secondary	tubal	0	IVF	2.43	6.7	3.8	43.43	12.36	1	1451	1.5	0.148	9.2	9	3	2018-06-09	2	1	0	0			- -
1919	2018-06-07 09:45	0	31	GnRH-agonist long protocol	16.38	secondary	tubal	9	IVF	2.692	9.03	6.4	41.15	24.23	1	996	3.12	0.21	8.8	3	2	2018-06-10	2	2	0	1	intrauterine pregnancy		2019-02-22	39	vaginal	male	3.2
1920	2018-06-11 10:15	0	39	GnRH-agonist long protocol	22.83	primary	tubal	3	IVF	2.56	4.96	5.44	42.5	14.12	1	1934	1.83	0.53	14.5	7	3	2018-06-14	2	1	0	1	intrauterine pregnancy	yes	- -
1921	2018-06-15 09:15	0	30	GnRH-agonist long protocol	22.15	primary	male	4	IVF	3.854	6.27	4.09	27.16	14.82	1	1670	3.09	0.255	12.9	6	2	2018-06-18	2	2	0	0			- -
1922	2018-06-16 09:00	0	39	GnRH-agonist long protocol	20.83	secondary	Mixed	10	IVF	0.836	5.96	2.85	21.34	22.44	3	3005	1.07	1.01	14	13	2	2018-06-19	2	2	0	1	intrauterine pregnancy		2019-02-21	37	Cesarean	male	2.8	female	2.15
1923	2018-06-17 08:55	1-2	40	GnRH-agonist long protocol	20.06	primary	Endometriosis	2	IVF	1.182	2.53	2.43	10.42	28	2	2499	2.41	0.344	10.3	10	7	2018-06-20	2	2	0	0			- -
1924	2018-06-19 09:45	0	41	GnRH-agonist long protocol	21.48	secondary	tubal	1	IVF	2.272	6.14	3.22	31.52	14.8	1	1688	1.6	0.223	11.2	9	5	2018-06-22	2	2	0	0			- -
1925	2018-06-19 10:05	0	24	GnRH-agonist long protocol	18.13	primary	male	1	ICSI	3.538	5.93	4.33	67.67	13.95	2	2554	1.28	0.56	17.9	8	2	2018-06-22	2	2	0	1	intrauterine pregnancy		2019-02-12	36	Cesarean	male	2.7	male	2.4
1926	2018-06-19 10:40	0	31	GnRH-agonist long protocol	22.31	primary	Mixed	1	IVF	2.034	7.47	2.83	37.1	13.39	2	2366	1.24	0.336	12.8	8	2	2018-06-22	2	1	0	1	intrauterine pregnancy		2019-03-02	38	vaginal			female	2.9
1927	2018-06-26 09:53	0	36	GnRH-agonist long protocol	22.6	secondary	tubal	2	IVF	4.124	7.45	5.15	41.11	13.47	1	1971	2.37	0.099	13	9	1	2018-06-29	1	1	0	0			- -
1928	2018-07-03 08:46	0	37	GnRH-agonist long protocol	29.14	secondary	tubal	2	IVF	0.562	1.53	5.26	27.7	9.64	1	898.4	1.3	0.08	5.9	4	3	2018-07-06	2	1	0	1	intrauterine pregnancy	yes	- -
1929	2018-07-08 10:20	0	34	GnRH-agonist long protocol	24.97	secondary	tubal	8	IVF	1.862	6.12	4.18	29.43	9.36	3	3172	2.38	0.212	12	13	2	2018-07-11	2	1	0	1	intrauterine pregnancy		2019-03-23	38	Cesarean	male	2.95
1930	2018-07-13 08:53	0	39	GnRH-agonist long protocol	21.61	secondary	male	2	ICSI	NA	2.95	5.73	44.23	14.49	1	1671	2.32	0.344	19.7	9	2	2018-07-16	2	2	0	1	intrauterine pregnancy		2019-03-12	36	Cesarean	male	2.6	female	2.6
1931	2018-07-15 09:40	0	33	GnRH-agonist long protocol	20.81	secondary	tubal	1	IVF	2.865	6.65	6.04	27.87	11.95	3	3978	0.873	0.488	NA	15	2	2018-07-18	2	2	0	1	intrauterine pregnancy		2019-03-20	38	Cesarean			female	3.3
1932	2018-07-17 10:35	0	39	GnRH-agonist long protocol	26.29	primary	tubal	7	IVF	8.48	3.72	5.4	45.23	14.56	2	2719	3.6	0.262	9.7	15	2	2018-07-20	2	2	0	1	intrauterine pregnancy		2019-03-14	36	Cesarean	male	2.5	female	1.95
1933	2018-07-19 09:40	0	32	GnRH-agonist long protocol	23.44	secondary	tubal	1	IVF	4.71	6.67	3.62	51	11.72	1	1292	0.842	0.296	11.9	6	3	2018-07-22	1	1	0	1	intrauterine pregnancy		2019-04-05	38	vaginal			female	2.8
1934	2018-07-19 09:55	0	30	GnRH-agonist long protocol	20.45	primary	tubal	4	IVF	1.825	6.4	4.28	45.52	10.36	3	3641	2.76	0.435	13.3	14	2	2018-07-22	2	1	0	1	intrauterine pregnancy		2019-03-16	36	vaginal	male	2.5	female	2.4
1935	2018-07-19 10:05	0	31	GnRH-agonist long protocol	20.44	primary	male	1	IVF	3.812	6.77	6.83	41.74	13.26	3	3018	2.9	0.47	10.4	8	2	2018-07-22	2	2	0	1	intrauterine pregnancy		2019-04-05	39	vaginal	male	3.7
1936	2018-07-23 09:30	0	37	GnRH-agonist long protocol	19.23	primary	tubal	2	IVF	4.4	9.31	7.61	22.26	17	3	3138	2.51	0.603	11.9	15	6	2018-07-26	2	1	0	0			- -
1937	2018-07-30 08:35	0	30	GnRH-agonist long protocol	19.38	secondary	Mixed	5	IVF	2.083	6.55	4.04	32.28	16.58	1	591.9	2.02	0.105	11.6	2	1	2018-08-02	1	1	0	0			- -
1938	2018-07-29 10:15	0	34	GnRH-agonist long protocol	24.91	secondary	tubal	1	IVF	2.479	5.86	1.67	28.76	13.76	3	3090	1.6	0.735	14.3	12	2	2018-08-01	2	2	0	1	intrauterine pregnancy		2019-03-30	37	vaginal	male	2.79
1939	2018-07-30 10:10	≥3	41	GnRH-agonist long protocol	22.58	secondary	male	10	ICSI	1.63	6.94	1.46	49	11.7	1	1313	2.52	0.44	12.2	6	5	2018-08-02	2	1	0	1	intrauterine pregnancy	yes	- -
1940	2018-08-01 09:45	1-2	33	GnRH-agonist long protocol	24.77	primary	Endometriosis	7	IVF	2.725	8.17	3.95	42.92	16.77	1	1771	2.34	0.116	14.8	7	4	2018-08-04	2	1	0	0			- -
1941	2018-08-04 09:20	0	39	GnRH-agonist long protocol	24.44	secondary	tubal	4	IVF	2.864	8.28	4.87	60.77	13.76	3	3342	1.47	0.801	12.2	13	3	2018-08-07	2	2	0	1	intrauterine pregnancy		2019-04-18	38	Cesarean			female	3.55
1942	2018-08-05 09:15	0	43	GnRH-agonist long protocol	20.96	secondary	tubal	2	IVF	0.917	4.59	4.86	87.06	15.61	1	941.6	2.18	0.26	9.4	1	1	2018-08-08	1	1	0	0			- -
1943	2018-08-08 09:10	0	37	GnRH-agonist long protocol	20.32	secondary	tubal	1	IVF	2.788	3.02	1.29	13.87	NA	2	2061	2.47	0.55	13	6	2	2018-08-11	2	2	0	0			- -
1944	2018-08-12 09:15	0	36	GnRH-agonist long protocol	21.78	secondary	tubal	5	IVF	0.686	2.66	4.84	70.6	15.7	1	1127	2.22	0.295	10.3	6	4	2018-08-15	2	1	0	1	intrauterine pregnancy		2019-04-11	36	Cesarean	male	2.6	male	2.8
1945	2018-08-14 09:12	1-2	37	GnRH-agonist long protocol	20.03	primary	male	7	IVF	2.734	7.64	4.58	30.41	17.41	1	953.2	2.75	0.142	11.2	3	2	2018-08-17	2	1	0	0			- -
1946	2018-08-19 09:23	0	41	GnRH-agonist long protocol	20.31	secondary	male	3	ICSI	1.8	7.96	5.86	62.55	17.43	1	982.6	2.7	0.502	11.1	4	3	2018-08-22	2	1	0	1	intrauterine pregnancy		2019-04-20	37	vaginal			female	2.7
1947	2018-08-21 10:10	0	31	GnRH-agonist long protocol	26.43	primary	male	6	ICSI	2.287	6.51	2.31	25.83	10.38	1	1244	1.01	0.547	12.4	10	2	2018-08-24	2	2	0	0			- -
1948	2018-08-22 09:03	0	35	GnRH-agonist long protocol	28.72	secondary	male	5	ICSI	1.38	5.79	3.33	9.72	11.99	2	2347	2.1	0.553	10.6	9	2	2018-08-25	2	2	0	1	intrauterine pregnancy		2019-05-07	38	Cesarean	male	3.1
1949	2018-08-28 08:40	0	40	GnRH-agonist long protocol	19.05	secondary	Ovulatory	3	IVF	4.286	7.69	4.2	32.51	11.17	1	1142	3.88	0.353	14.5	7	2	2018-08-31	2	1	0	1	intrauterine pregnancy		2019-05-15	39	Cesarean	male	4.3
1950	2018-08-29 09:38	0	33	GnRH-agonist long protocol	18.75	primary	male	4	ICSI	3.91	4.42	3.13	57	22.74	4	4504	2.36	0.566	14.4	11	3	2018-09-01	2	2	0	1	intrauterine pregnancy		2019-05-24	39	vaginal	male	3.5
1951	2018-08-30 10:00	0	36	GnRH-agonist long protocol	23.63	secondary	Ovulatory	10	IVF	2.468	3.99	6.88	45.44	15.44	1	1164	2.99	0.29	12.7	5	4	2018-09-02	1	1	0	1	intrauterine pregnancy		2019-05-13	39	Cesarean	male	3
1952	2018-09-01 10:13	0	35	GnRH-agonist long protocol	22.03	secondary	tubal	8	IVF	1.65	8.04	5.38	37.8	20.96	2	2301	1.16	0.673	11	10	4	2018-09-04	2	2	0	1	intrauterine pregnancy		2019-05-25	39	vaginal			female	3.1
1953	2018-09-03 10:30	0	34	GnRH-agonist long protocol	22.89	primary	male	2	ICSI	4.681	5.54	5.46	28.43	10.85	2	2723	1.43	0.425	10.5	15	2	2018-09-06	2	2	0	0			- -
1954	2018-09-08 10:30	0	28	GnRH-agonist long protocol	22.58	primary	Endometriosis	2	IVF	5.349	3.49	2.2	5	12.36	2	2198	2.66	0.845	11.6	12	2	2018-09-11	2	2	0	0			- -
1955	2018-09-10 08:40	1-2	41	GnRH-agonist long protocol	26.22	secondary	tubal	2	IVF	1.48	4.26	2.39	54.63	12.33	1	568.1	0.484	0.239	10.8	2	1	2018-09-13	1	1	0	0			- -
1956	2018-09-10 09:40	0	34	GnRH-agonist long protocol	20.28	secondary	tubal	9	IVF	1.35	8.15	2.66	51.11	18.63	2	2618	2.29	0.693	12.4	5	2	2018-09-13	2	2	0	1	intrauterine pregnancy		2019-05-30	39	vaginal			female	2.9
1957	2018-09-12 09:30	0	29	GnRH-agonist long protocol	NA	secondary	tubal	2	IVF	4.014	7.89	3.37	47.16	11.51	1	1688	0.945	0.5	10.8	13	2	2018-09-15	2	1	1	1	intrauterine pregnancy		2019-05-21	37	Cesarean	female	2.45		3
1958	2018-09-15 09:45	0	34	GnRH-agonist long protocol	20.83	primary	tubal	2	IVF	4.03	3.51	4.49	60.07	14.91	3	3070	1.52	0.938	12.9	16	2	2018-09-18	2	1	0	0			- -
1959	2018-09-15 10:10	0	39	GnRH-agonist long protocol	19.84	secondary	Unexplained	1	IVF	0.629	2.77	8.03	19.62	16.47	1	1212	1.73	0.635	12.1	7	6	2018-09-18	2	2	0	1	intrauterine pregnancy		2019-04-03	31	Cesarean	male	1.35
1960	2018-09-17 08:40	0	30	GnRH-agonist long protocol	18.38	primary	male	2	IVF	5.734	4.64	1.66	63.14	12.8	1	656.9	0.914	0.198	10.2	3	3	2018-09-20	2	1	0	1	intrauterine pregnancy		2019-06-06	39	vaginal			female	3.1
1961	2018-09-17 09:20	1-2	26	GnRH-agonist long protocol	17.36	primary	Mixed	3	ICSI	1.86	1.23	4.94	34.38	15.06	2	2733	1.65	0.852	9.3	6	2	2018-09-20	2	1	0	1	intrauterine pregnancy		2019-06-04	39	vaginal			female	2.8
1962	2018-09-22 09:20	1-2	30	GnRH-agonist long protocol	19.95	secondary	tubal	5	IVF	5.682	5.92	5.02	59.59	13.58	2	2697	0.888	0.485	10.2	17	2	2018-09-25	2	2	1	1	intrauterine pregnancy		2019-06-01	37	Cesarean	male	3.4
1963	2018-09-25 09:55	0	35	GnRH-agonist long protocol	22.43	secondary	tubal	2	IVF	1.508	8.46	4.34	44.85	24.13	3	3070	1.57	1.04	10.9	5	4	2018-09-28	2	1	0	1	intrauterine pregnancy		2019-06-19	40	vaginal			female	2.6
1964	2018-09-25 10:15	0	31	GnRH-agonist long protocol	20.49	secondary	tubal	2	IVF	1.571	7.81	4.57	63.25	16.45	1	1629	1.98	0.325	11.2	7	2	2018-09-28	2	2	0	0			- -
1965	2018-09-28 08:35	0	28	GnRH-agonist long protocol	19.14	primary	male	6	IVF	2.987	8.77	4.96	32.61	15.1	2	2068	2.23	0.699	14.1	4	1	2018-10-01	1	1	0	1	intrauterine pregnancy	yes	- -
1966	2018-09-30 09:10	1-2	34	GnRH-agonist long protocol	16.8	primary	tubal	8	IVF	1.563	3.66	4.39	63.06	24.27	1	1226	2.43	0.274	12.1	8	2	2018-10-03	2	2	1	1	intrauterine pregnancy		2019-06-12	38	Cesarean	male	2.78
1967	2018-10-01 09:02	0	30	GnRH-agonist long protocol	20.28	primary	tubal	3	IVF	2.771	7.96	3.25	37.78	12.06	1	1357	2.01	0.278	11.6	5	4	2018-10-04	1	1	0	0			- -
1968	2018-10-06 09:20	0	37	GnRH-agonist long protocol	24.78	secondary	tubal	2	IVF	1.471	7.67	3.68	57.19	13.71	1	1173	1.44	0.18	8.6	6	1	2018-10-09	1	1	0	0			- -
1969	2018-10-07 09:00	0	29	GnRH-agonist long protocol	20.4	secondary	tubal	2	IVF	1.711	7.8	4.54	35.85	14.02	1	1767	2.27	0.212	13.5	8	2	2018-10-10	2	2	0	1	intrauterine pregnancy		2019-05-19	34	Cesarean	female	3.8		1.98
1970	2018-10-11 08:50	0	28	GnRH-agonist long protocol	18.89	primary	Unexplained	3	IVF	0.85	5.02	4.41	43.2	18.93	1	937.5	2.44	0.438	12.5	3	2	2018-10-14	2	1	0	1	intrauterine pregnancy		2019-06-23	38	Cesarean	male	3.7
1971	2018-10-15 10:12	0	28	GnRH-agonist long protocol	31.24	primary	male	2	ICSI	2.095	2.71	5.03	17.51	9.02	2	2486	1.92	0.605	10.4	16	2	2018-10-18	2	2	0	1	intrauterine pregnancy		2019-06-13	36	Cesarean	male	3.1	female	2.15
1972	2018-10-18 09:10	0	37	GnRH-agonist long protocol	21.56	secondary	male	8	IVF	1.28	4.5	5.66	38.01	18.2	2	2332	2.7	0.675	11.8	10	5	2018-10-21	2	1	0	1	intrauterine pregnancy		2019-06-18	37	Cesarean	male	2.78	female	2.81
1973	2018-10-20 09:30	0	35	GnRH-agonist long protocol	24.03	secondary	tubal	1	IVF	1.945	7.21	2.78	50.75	13.84	1	1886	3.57	0.671	8.6	10	2	2018-10-23	2	2	0	0			- -
1974	2018-10-23 08:50	0	40	GnRH-agonist long protocol	21.09	primary	male	3	IVF	1.667	4.92	4.26	44.52	15.73	2	2566	1.74	0.808	11.9	7	4	2018-10-26	2	1	0	0			- -
1975	2018-11-02 09:20	1-2	37	GnRH-agonist long protocol	18.82	secondary	tubal	4	IVF	1.284	9.02	6.18	46.31	22.25	1	1011	1.36	0.486	10.2	5	5	2018-11-05	2	1	0	0			- -
1976	2018-11-03 08:46	0	37	GnRH-agonist long protocol	16.85	primary	male	8	ICSI	2.92	5.66	3.33	11.63	15.4	2	2004	3.77	0.343	9.2	6	2	2018-11-06	2	2	0	1	intrauterine pregnancy		2019-07-15	38	Cesarean	male	2.4
1977	2018-11-03 09:35	0	30	GnRH-agonist long protocol	18.2	secondary	tubal	5	IVF	0.81	8.9	4.5	31.2	19.38	1	1871	1.15	0.741	10.4	5	2	2018-11-06	2	1	0	1	intrauterine pregnancy		2019-07-23	39	vaginal	male	3.3
1978	2018-11-05 09:06	0	39	GnRH-agonist long protocol	22.72	secondary	male	2	ICSI	2.43	7.56	5.38	54.61	8.38	2	2475	2.48	0.557	16.8	11	4	2018-11-08	2	2	0	0			- -
1979	2018-11-09 10:10	0	34	GnRH-agonist long protocol	20.83	secondary	tubal	2	IVF	1.8	3.38	4.5	45.2	15	1	1525	2.8	0.446	9.2	6	3	2018-11-12	2	2	0	1	intrauterine pregnancy		2019-07-31	39	vaginal			female	3.15
1980	2018-11-11 10:15	0	29	GnRH-agonist long protocol	18.36	secondary	Mixed	3	ICSI	3.08	5.67	3.79	55	13.16	4	4255	2.94	0.3	10.4	13	2	2018-11-14	2	1	0	1	intrauterine pregnancy		2019-08-12	41	Cesarean	male	3.15
1981	2018-11-12 09:16	0	23	GnRH-agonist long protocol	31.65	primary	tubal	3	IVF	2.197	8.53	5.91	31.38	9.85	1	1693	1.43	0.679	15.1	7	2	2018-11-15	2	2	0	0			- -
1982	2018-11-16 08:50	0	25	GnRH-agonist long protocol	17.19	secondary	Endometriosis	2	IVF	3.979	8.49	2.61	37.51	17.45	2	2086	3.06	0.635	10.2	14	2	2018-11-19	2	2	0	1	intrauterine pregnancy		2019-07-23	37	Cesarean	male	2.1	male	2.35
1983	2018-11-20 08:40	0	27	GnRH-agonist long protocol	16.65	primary	tubal	8	IVF	1.138	8.14	5.9	79	22.41	2	2341	2.06	1.03	10.8	5	1	2018-11-23	1	1	0	0			- -
1984	2018-11-20 09:30	0	32	GnRH-agonist long protocol	20.43	primary	tubal	3	IVF	2.15	7.53	6.59	25	16.78	1	975.9	1.63	0.225	10.3	4	4	2018-11-23	2	1	0	1	intrauterine pregnancy	yes	- -
1985	2018-11-20 09:45	1-2	38	GnRH-agonist long protocol	19.78	secondary	tubal	1	IVF	2.585	7.67	5.34	73.05	14.83	1	941	1.11	0.606	11.8	6	4	2018-11-23	2	2	0	0			- -
1986	2018-11-20 10:05	0	33	GnRH-agonist long protocol	18.07	primary	Unexplained	4	IVF	2.511	7.93	3.42	21.44	2.28	2	2045	14.81	0.389	10.7	8	2	2018-11-23	2	2	0	1	intrauterine pregnancy		2019-08-05	39	vaginal	male	3.25
1987	2018-11-21 09:05	1-2	31	GnRH-agonist long protocol	22.64	secondary	male	6	ICSI	0.976	7.85	4.59	24.03	15.02	1	1527	5.57	0.631	10.4	8	6	2018-11-24	2	2	0	1	intrauterine pregnancy		2019-07-08	34	Cesarean	male	2.3	male	2.3
1988	2018-11-26 09:06	0	41	GnRH-agonist long protocol	20.45	secondary	male	1	IVF	0.659	4.64	3.77	26.8	17.62	1	668.4	3.81	0.253	10	2	2	2018-11-29	2	1	0	0			- -
1989	2018-11-26 09:36	1-2	28	GnRH-agonist long protocol	17.97	primary	Ovulatory	3	IVF	1.11	3.56	5.22	54.06	20.37	1	1650	1.14	0.337	11.7	4	4	2018-11-29	2	1	0	0			- -
1990	2018-11-26 10:06	0	31	GnRH-agonist long protocol	24.14	primary	tubal	4	IVF	1.977	7.14	3.42	42.4	15.85	3	3377	0.943	0.639	12	12	2	2018-11-29	2	2	0	1	intrauterine pregnancy		2019-08-01	37	Cesarean	female	2.4		2.25
1991	2018-11-26 10:16	0	32	GnRH-agonist long protocol	21.08	primary	tubal	6	IVF	2.111	2.25	5.82	15.65	14.86	1	1970	3.4	0.556	10.5	8	2	2018-11-29	2	1	0	1	intrauterine pregnancy		2019-08-12	38	vaginal			female	2.95
1992	2018-11-27 08:40	0	28	GnRH-agonist long protocol	21.48	secondary	tubal	5	IVF	3.966	2.32	1.61	8.58	15.14	2	2359	2.58	0.502	12.6	11	2	2018-11-30	2	1	0	1	intrauterine pregnancy		2019-08-14	38	Cesarean			female	3
1993	2018-11-27 08:55	0	31	GnRH-agonist long protocol	21.48	secondary	Endometriosis	1	IVF	3.61	7.24	4.88	21.91	15.13	1	1662	1.43	0.3	12.7	7	2	2018-11-30	2	1	1	1	intrauterine pregnancy		2019-06-25	32	Cesarean	male	1.85	female	1.6
1994	2018-11-27 09:25	0	39	GnRH-agonist long protocol	20.81	secondary	tubal	1	IVF	2.047	3.25	1.37	5	20.95	1	1098	2.26	0.535	7.7	6	4	2018-11-30	2	1	0	1	intrauterine pregnancy		2019-07-03	34	vaginal			female	1.9
1995	2018-11-30 09:40	0	34	GnRH-agonist long protocol	20.83	secondary	tubal	7	IVF	2.904	4.35	5.59	15.57	13.18	1	1704	2.78	0.378	12.9	11	2	2018-12-03	2	2	0	0			- -
1996	2018-12-03 09:36	0	39	GnRH-agonist long protocol	27.73	primary	tubal	1	IVF	1.44	5.32	3.16	33	15.4	1	981.6	3.35	0.221	12.3	6	2	2018-12-06	2	2	0	0			- -
1997	2018-12-04 09:00	0	34	GnRH-agonist long protocol	28.08	primary	tubal	9	IVF	1.77	6.35	3.9	32.04	13.57	3	3070	1.25	0.771	11	3	3	2018-12-07	2	1	0	0			- -
1998	2018-12-07 08:40	1-2	39	GnRH-agonist long protocol	19.14	secondary	tubal	2	IVF	0.181	2.94	5.73	32.42	15.91	1	973.4	4.11	0.393	NA	3	2	2018-12-10	2	1	0	1	intrauterine pregnancy		2019-08-25	39	Cesarean			female	3
1999	2018-12-12 09:23	1-2	30	GnRH-agonist long protocol	21.23	primary	Endometriosis	5	IVF	2.968	6.28	4	27	15.88	2	2815	3.08	0.63	10	12	2	2018-12-15	2	1	0	1	intrauterine pregnancy		2019-08-29	39	Cesarean			female	2.85
[truncated: 219 more rows]
