# Supplementary material for: Elevated estradiol levels on hCG trigger day adversely effects on the clinical pregnancy rates of blastocyst embryo transfer but not cleavage-stage embryo transfer in fresh cycles: a retrospective cohort study
Source: PeerJ. 2023 Jul 18;11:e15709. doi: 10.7717/peerj.15709 (PMC10361074; doi:10.7717/peerj.15709)
Supplement: Supplemental Information 2 [file peerj-11-15709-s002.xlsx]

## Sheet: D5 拮抗剂+抑制剂（包含劣质胚胎）
No.	Date of oocyte retrieval	previous cycle	female age	COH protocol	BMI	Sterility classification	infertility indication	Duration of infertility（ys）	Fertilization type	AMH	basal FSH	basal LH	basal E2	hcg day FSH	E2 set(set 1 (E2 ≤ 2000 pg/ml), set 2 (E2 = 2001-3000 pg/ml), set 3 (E2 = 3001-4000 pg/ml), and set 4 (E2 > 4000 pg/ml))	hcg day E2	hcg day LH	hcg day P	endometrial thickness	No. of retrieved oocytes	No. of inviable embryos	date of embryo transfer	No. of embryos transferred	No. of high-quality embryos transferred	OHSS(0-No; 1-Yes)	clinical pregnancy(0-No; 1-Yes)	Pregnancy classification	Miscarriage	data of childbirth	Gestational age	delivery method	baby 1 gender	baby 1 birth weight (kg)	baby 2 gender	baby 1 birth weight (kg)
1	2020-05-09 09:35:00	1	42	GnRH-antagonist	25.28	primary	male	11	ICSI	5.614	6.66	4.76	34.33	12.29	2	2281	1.47	0.745	10.2	17	5	2020-05-14 11:50:15	1	1	0	0
2	2020-05-31 09:15:06	0	27	GnRH-antagonist	18.03	primary	Tubal	2	IVF	2.12	7.47	6.84	45.09	9.78	3	3751	3.55	0.761	13.6	10	7	2020-06-05 11:45:08	1	1	0	1	intrauterine pregnancy		2021-02-20	39	Cesarean	female	3.05
3	2020-05-31 09:40:12	0	30	GnRH-antagonist	19.56	secondary	Tubal	4	IVF	NA	6.51	6.2	34.54	9.42	2	2169	1.57	0.334	9.8	11	4	2020-06-05 11:35:21	1	1	0	1	intrauterine pregnancy		2021-02-10	38	Cesarean	female	2.8
4	2020-06-18 10:10:34	0	32	GnRH-antagonist	23.53	secondary	Tubal	2	ICSI	13.21	7.12	9.67	29.51	12.29	3	3808	4.79	0.797	13.1	14	8	2020-06-23 10:35:20	1	1	0	1	intrauterine pregnancy		2021-03-06	39	Cesarean	female	3
5	2020-06-25 09:16:27	0	37	GnRH-antagonist	20.39	secondary	Endometriosis	3	IVF	3.26	8.03	8.46	55.24	10.89	2	2023	3.19	0.481	11.3	10	4	2020-06-30 11:05:13	1	1	0	0
6	2020-07-08 09:10:54	0	30	GnRH-antagonist	20.32	secondary	Tubal	2	IVF	8.46	4.63	4.39	31.88	10.71	2	2568	1.69	0.581	14.7	16	10	2020-07-13 11:10:15	1	1	0	1	intrauterine pregnancy	yes
7	2020-07-17 09:30:14	1	22	GnRH-antagonist	19.53	primary	Tubal	1	IVF	1.23	8.36	2.48	76.97	11.38	1	1206	1.3	0.213	10.8	10	9	2020-07-22 10:55:45	1	1	0	1	intrauterine pregnancy		2021-04-05	39	Vaginal	male	2.4
8	2020-07-22 10:00:22	0	27	GnRH-antagonist	24.39	primary	Ovulatory	5	IVF	2.456	5.93	4.38	23.77	14	2	2406	3.48	0.496	12.2	10	7	2020-07-27 10:55:22	1	1	0	1	intrauterine pregnancy		2021-03-01	33	Cesarean	female	1.45
9	2020-07-26 09:00:13	0	24	GnRH-antagonist	25.24	secondary	Tubal	2	IVF	3.49	6.84	6.05	35.14	21.54	3	3474	1.66	1.06	13.9	17	15	2020-07-31 11:15:20	1	1	0	1	intrauterine pregnancy		2021-03-31	37	Cesarean	female	2.4
10	2020-08-04 08:45:19	0	31	GnRH-antagonist	21.77	secondary	Tubal	5	IVF	2.56	6.16	6.2	76.91	15.86	2	2755	1.1	1.4	9.6	16	10	2020-08-09 11:50:46	1	1	0	0
11	2020-08-05 10:45:09	0	27	GnRH-antagonist	22.04	primary	Ovulatory	3	IVF	4.62	6.85	6.08	51.48	10.12	2	2834	3.8	0.595	12	12	3	2020-08-10 10:45:07	1	1	0	0
12	2020-08-13 09:30:13	0	27	GnRH-antagonist	17.78	primary	male	2	ICSI	5.12	8.17	7.4	25.15	17.26	2	2764	1.98	1.32	9.6	12	7	2020-08-18 10:33:22	1	1	0	0
13	2020-08-15 08:50:53	0	31	GnRH-antagonist	29.26	secondary	Tubal	10	IVF	4.59	8.3	6.9	74	9.57	3	3910	2.91	0.524	12	16	12	2020-08-20 10:45:06	1	1	1	1	intrauterine pregnancy		2021-04-23	37	Vaginal	male	2.77
14	2020-08-15 09:05:51	0	33	GnRH-antagonist	20.58	secondary	Tubal	3	IVF	2.86	6.65	6.41	77.14	10.49	3	3137	3.05	0.605	11.1	18	12	2020-08-20 11:50:40	1	1	0	0
15	2020-08-19 09:45:07	0	34	GnRH-antagonist	18.08	primary	male	4	ICSI	3.13	7.03	5.43	34.18	11.75	2	2388	1.92	0.848	15.5	9	4	2020-08-24 11:25:55	1	1	0	0
16	2020-08-21 09:00:22	0	29	GnRH-antagonist	19.38	primary	Tubal	6	IVF	3.77	7.27	5.29	79.93	12.58	3	3678	1.92	0.68	15.3	14	7	2020-08-26 10:55:19	1	1	0	1	intrauterine pregnancy		2021-05-06	38	Vaginal	male	3
17	2020-08-23 08:30:52	0	37	GnRH-antagonist	24.77	primary	Unexplained	2	IVF	6.149	6.11	7.2	42.9	8.85	3	3676	3.51	1.01	12.2	18	7	2020-08-28 10:53:06	1	1	0	0
18	2020-08-23 10:05:25	0	30	GnRH-antagonist	21.87	secondary	Tubal	1	IVF	6.65	6.41	7.99	58.65	10.74	3	3844	1.78	1.24	8.5	15	5	2020-08-28 11:15:38	1	1	0	1	intrauterine pregnancy		2021-05-16	40	Cesarean	female	3.6
19	2020-08-28 09:00:33	0	43	GnRH-antagonist	24.84	secondary	Tubal	2	IVF	1.67	7.58	6.66	26.85	13.61	4	4208	4.09	0.653	9.7	12	5	2020-09-02 11:31:00	1	1	0	0
20	2020-08-28 09:36:00	0	27	GnRH-antagonist	20.78	primary	Endometriosis	2	IVF	3.67	5.23	5.62	32.7	12.58	2	2401	3.67	0.852	12.9	8	4	2020-09-02 11:20:33	1	1	0	1	intrauterine pregnancy		2021-05-16	39	Vaginal	female	3.32
21	2020-09-02 08:50:52	0	39	GnRH-antagonist	18.07	secondary	Tubal	4	IVF	3.87	5.47	3.29	50.27	10.83	2	2539	2.28	0.773	10	11	8	2020-09-07 11:35:17	1	1	0	1	intrauterine pregnancy	yes
22	2020-09-04 09:55:39	0	34	GnRH-antagonist	25.64	primary	Ovulatory	6	IVF	6.92	3.95	8.03	46.36	8.27	4	4075	4.55	0.342	13.2	15	6	2020-09-09 11:28:43	1	1	0	1	intrauterine pregnancy		2021-05-28	40	Vaginal	male	3.75
23	2020-09-13 09:00:13	0	31	GnRH-antagonist	22.04	primary	Unexplained	2	IVF	2.76	6.95	4.19	39.32	13.37	1	1624	1.26	0.633	11.7	12	7	2020-09-18 11:43:40	1	1	1	0
24	2020-09-19 09:40:11	0	28	GnRH-antagonist	20.96	secondary	Tubal	6	IVF	NA	5.16	5.06	31.89	13.74	3	3951	4.18	1.15	11.4	16	7	2020-09-24 11:26:20	1	1	0	0
25	2020-09-24 09:45:03	0	30	GnRH-antagonist	25.34	secondary	Tubal	1	ICSI	7.03	4.6	4.92	29	9.78	4	4045	1.36	1.08	10.5	16	10	2020-09-29 11:10:15	1	1	0	1	intrauterine pregnancy		2021-06-02	37	Vaginal	female	3.26
26	2020-09-30 09:20:40	0	31	GnRH-antagonist	18.07	secondary	Tubal	1	IVF	3.89	6.48	6.8	43.34	12.16	2	2368	4.63	0.659	10.1	9	6	2020-10-05 11:24:30	1	1	0	0
27	2020-10-06 09:30:00	2	32	GnRH-antagonist	18.44	primary	Unexplained	3	IVF	1.129	11.7	4.04	34.15	17.81	1	1274	1.5	0.841	8.2	7	3	2020-10-11 10:27:20	1	1	0	0
28	2020-10-07 10:25:22	0	32	GnRH-antagonist	20.57	secondary	Tubal	1	IVF	2.32	7.58	5.46	35.19	16.86	2	2383	5.19	0.772	10	15	8	2020-10-12 11:40:41	1	1	0	0
29	2020-10-10 10:05:44	0	30	GnRH-antagonist	19.53	primary	Tubal	10	IVF	1.49	8.27	5.32	81	14.8	1	1976	0.789	0.778	10.1	12	6	2020-10-15 11:10:09	1	1	0	1	intrauterine pregnancy		2021-06-25	38	Cesarean	male	3.35
30	2020-10-20 09:20:42	0	32	GnRH-antagonist	21.78	secondary	Tubal	3	IVF	NA	6.21	6.46	45.37	10.09	2	2399	2.22	0.75	6.6	13	5	2020-10-25 10:25:03	1	1	0	0
31	2020-10-22 09:30:59	0	28	GnRH-antagonist	21.23	primary	male	3	ICSI	11.49	6.38	6.67	50.93	8.53	3	3378	2.44	0.734	13.5	17	9	2020-10-27 11:15:01	1	1	0	1	intrauterine pregnancy		2021-07-07	38	Cesarean	male	3.2
32	2020-10-24 10:20:17	0	31	GnRH-antagonist	18.31	secondary	male	1	ICSI	5.45	6.56	5.59	69.01	10.17	3	3562	1.36	0.929	9.4	13	6	2020-10-29 11:15:20	1	1	0	0
33	2020-10-31 08:45:52	0	35	GnRH-antagonist	19.05	primary	Ovulatory	2	IVF	3.51	8.2	8.34	51.6	12.55	3	3592	4.27	0.724	12.5	12	6	2020-11-05 11:15:45	1	1	0	1	intrauterine pregnancy		2021-07-23	39	Vaginal	female	3.3
34	2020-11-02 09:16:15	0	35	GnRH-antagonist	18.36	secondary	Tubal	2	IVF	2.47	8.44	5.37	79.17	13.6	3	3264	2.6	0.878	7.9	9	5	2020-11-07 10:45:23	1	1	0	1	intrauterine pregnancy		2021-07-07	37	Cesarean	male	2.76
35	2020-11-08 09:40:00	0	32	GnRH-antagonist	24.38	secondary	Tubal	1	ICSI	3.28	6.25	5.71	39.2	10.22	4	4674	5.23	1.05	10.1	19	8	2020-11-13 10:46:18	1	1	0	1	intrauterine pregnancy		2021-08-06	40	Cesarean	male	3
36	2020-11-10 09:45:53	0	31	GnRH-antagonist	24	secondary	Tubal	2	IVF	4.1	8.39	8.38	27.88	13.24	2	2191	4.23	0.835	11.9	12	5	2020-11-15 10:36:12	1	1	0	0
37	2020-11-13 09:45:23	0	29	GnRH-antagonist	17.65	secondary	Tubal	3	IVF	2.51	8.26	8.1	78.17	13.75	3	3781	3.33	0.73	13.7	12	9	2020-11-18 10:40:51	1	1	0	1	intrauterine pregnancy		2021-08-10	40	Vaginal	male	3.3
38	2020-11-19 09:35:01	0	31	GnRH-antagonist	21.48	primary	Tubal	11	IVF	2.86	6.53	7.12	58.34	8.46	1	1970	3.6	0.452	10.4	13	7	2020-11-24 11:15:41	1	1	0	0
39	2020-11-22 09:26:51	0	29	GnRH-antagonist	18.99	primary	Tubal	5	IVF	1.22	10.99	5.55	31.73	15.97	2	2378	4.39	0.474	15.4	5	4	2020-11-27 10:20:27	1	0	0	0
40	2020-12-13 09:35:38	0	28	GnRH-antagonist	18.67	secondary	male	1	ICSI	5.3	7.07	7.42	37.79	12.56	4	4470	1.14	1.35	10.2	17	6	2020-12-18 11:00:13	1	1	0	1	intrauterine pregnancy		2021-08-18	37	Cesarean	female	3
41	2020-12-21 09:06:05	0	30	GnRH-antagonist	23.93	primary	Tubal	1	IVF	2.47	7.3	7.3	51.1	11.76	3	3446	2.21	0.988	10.7	12	8	2020-12-26 10:55:08	1	1	0	1	intrauterine pregnancy		2021-09-07	39	Cesarean	female	3.2
42	2020-12-28 08:56:35	0	33	GnRH-antagonist	24.65	secondary	Tubal	7	IVF	0.981	6.43	3.31	38.04	16.09	4	4640	3.2	0.906	11.3	10	6	2021-01-02 11:38:23	1	1	0	0
43	2020-12-31 09:25:57	0	29	GnRH-antagonist	20.07	secondary	Tubal	2	IVF	6.575	4.94	4.68	28	9.21	3	3373	5.15	0.418	12.4	10	5	2021-01-05 11:00:36	1	1	0	0
44	2021-01-06 09:25:23	0	31	GnRH-antagonist	19.84	primary	Ovulatory	4	IVF	6.22	4.93	3.29	48.99	8.95	2	2892	2.26	0.577	11.3	14	9	2021-01-11 11:35:40	1	1	0	1	intrauterine pregnancy		2021-08-31	35	Vaginal	male	2.55
45	2021-01-10 09:55:47	0	34	GnRH-antagonist	20.96	primary	Endometriosis	1	IVF	2.76	6.25	4.28	39.84	17.52	2	2835	1.14	1.18	12.2	10	4	2021-01-15 11:00:51	1	1	0	0
46	2021-01-14 09:10:38	1	31	GnRH-antagonist	18.37	primary	Tubal	2	IVF	1.87	6.99	6.73	49.29	18.01	1	1733	3.28	1.15	11.3	7	3	2021-01-19 11:05:48	1	0	0	0
47	2021-01-14 09:35:25	0	30	GnRH-antagonist	19.29	primary	Unexplained	1	IVF	3.591	7.62	9.53	67.19	10.97	4	4376	7.59	0.988	9.9	13	7	2021-01-19 10:55:30	1	1	0	1	intrauterine pregnancy		2021-10-15	41	Vaginal	male	3.5
48	2021-01-28 09:05:05	0	28	GnRH-antagonist	19.77	secondary	male	1	ICSI	3.73	7.49	5.15	32.41	11.63	2	2048	4.97	0.48	7.8	11	7	2021-02-02 11:00:38	1	1	0	0
49	2021-03-01 09:35:08	0	34	GnRH-antagonist	23.23	secondary	Tubal	8	IVF	2.85	5.74	3.73	20.69	16.12	4	4199	2.95	0.77	11.7	9	4	2021-03-06 11:45:46	1	1	0	1	intrauterine pregnancy		2021-11-13	38	Cesarean	female	2.8
50	2021-03-02 09:20:33	0	25	GnRH-antagonist	20.28	secondary	Mixed	1	IVF	3.25	4.42	3.17	57.6	9.15	1	1829	2.63	0.77	8.8	15	6	2021-03-07 09:25:49	1	1	0	1	intrauterine pregnancy		2021-11-08	37	Vaginal	female	3.24
51	2021-03-04 09:15:46	0	36	GnRH-antagonist	24.44	secondary	Ovulatory	2	IVF	8.98	7.73	9.44	53.46	9.87	3	3400	6.56	1.28	9.5	10	6	2021-03-09 11:15:13	1	1	0	1	intrauterine pregnancy		2021-11-21 14:46:58	39	Vaginal	male	3.3
52	2021-03-04 10:10:07	0	30	GnRH-antagonist	20.32	primary	male	2	ICSI	4.877	5.07	4.83	32.97	9.06	3	3806	5.02	0.83	8.2	13	3	2021-03-09 11:05:35	1	1	0	0
53	2021-03-08 09:50:06	0	28	GnRH-antagonist	21.26	primary	male	4	ICSI	4.45	6.45	4.35	26.31	14.83	1	1571	1.97	0.7	12.7	8	6	2021-03-13 11:10:42	1	1	0	1	intrauterine pregnancy		2021-12-03	40	Vaginal	female	3.3
54	2021-03-08 09:55:10	0	35	GnRH-antagonist	20.58	secondary	Unexplained	2	IVF	2.48	7.76	6	39.94	18.54	1	1564	1.35	0.76	10.1	10	7	2021-03-13 12:10:41	1	1	1	1	intrauterine pregnancy		2021-11-24	39	Cesarean	male	2.6
55	2021-03-12 08:55:55	0	31	GnRH-antagonist	24.77	primary	Unexplained	5	IVF	2.14	5.35	4.29	28.93	9.51	1	842.92	1.08	0.32	9	13	8	2021-03-17 11:20:24	1	1	0	1	intrauterine pregnancy		2021-11-25	38	Vaginal	male	3.75
56	2021-03-14 09:20:51	0	32	GnRH-antagonist	21.44	primary	Endometriosis	5	IVF	7.29	5.21	6.13	62.66	13.48	3	3306	1.17	0.62	11.6	17	10	2021-03-19 11:50:25	1	1	0	0
57	2021-03-18 09:10:43	0	34	GnRH-antagonist	20.03	secondary	Unexplained	1	IVF	2.44	4.82	3.38	8.64	15.67	3	3430	2.19	0.54	14.1	14	6	2021-03-23 11:40:46	1	1	0	1	intrauterine pregnancy		2021-12-06	39	Vaginal	male	3.23
58	2021-04-01 09:18:06	0	28	GnRH-antagonist	26.84	secondary	Tubal	3	IVF	4.14	5.19	6.81	46.84	7.54	1	1293.05	0.67	0.22	9.3	14	6	2021-04-06 10:36:33	1	1	0	0
59	2021-04-09 09:35:17	0	32	GnRH-antagonist	18.03	primary	Unexplained	2	IVF	NA	6.58	7.22	74.62	12.02	3	3591.59	6.12	0.49	11.7	8	5	2021-04-14 11:25:52	1	1	0	0
60	2021-04-12 08:40:54	0	26	GnRH-antagonist	20.03	secondary	Tubal	2	IVF	4.19	4.12	4.28	29.58	12.95	3	3835	1.2	0.56	11.2	12	6	2021-04-17 11:25:25	1	1	0	0
61	2021-04-14 09:40:00	0	34	GnRH-antagonist	20.17	secondary	Endometriosis	10	IVF	2.66	6.09	4.88	24.02	11.34	3	3177.57	1.06	0.47	9.8	12	6	2021-04-19 11:10:31	1	1	0	1	intrauterine pregnancy		2022-01-08	40	Vaginal	male	3.32
62	2021-04-15 08:45:00	0	29	GnRH-antagonist	22.89	primary	Mixed	4	IVF	5.18	5.92	8.98	40.71	8.75	4	4015	5.02	0.46	7.6	9	3	2021-04-20 10:05:29	1	1	0	1	intrauterine pregnancy		2022-01-07	40	Cesarean	male	3.8
63	2021-04-16 08:50:00	0	34	GnRH-antagonist	23.73	primary	Mixed	0	IVF	2.33	7.2	4.5	67.06	16.33	2	2108	2.28	0.42	12.3	4	2	2021-04-21 11:04:45	1	1	0	1	intrauterine pregnancy		2021-11-26	34	Cesarean	female	1.8
64	2021-04-20 09:35:53	0	32	GnRH-antagonist	20.96	primary	Ovulatory	5	IVF	9.81	6.61	8.76	47.02	9.65	3	3476.61	7.22	0.27	12.1	8	3	2021-04-25 10:25:02	1	1	0	0
65	2021-04-25 08:40:35	2	27	GnRH-antagonist	16.56	primary	DOR	1	IVF	0.556	9.97	5.34	13.18	17.62	1	574.96	1.51	0.24	9.3	2	2	2021-04-30 11:05:10	1	1	0	1	intrauterine pregnancy	yes
66	2021-05-06 08:45:11	0	25	GnRH-antagonist	22.83	primary	Unexplained	4	IVF	4.92	7.82	2.63	20.18	12.27	1	1586.63	2.35	0.28	12.5	13	2	2021-05-11 10:55:12	1	1	0	1	intrauterine pregnancy		2022-01-14	38	Vaginal	female	2.5
67	2021-05-07 10:00:05	0	29	GnRH-antagonist	26.37	secondary	Tubal	3	IVF	7.59	4.91	3.84	37.37	6.89	3	3634.61	6.72	0.67	9.9	8	5	2021-05-12 10:20:51	1	1	0	0
68	2021-05-19 09:30:20	0	38	GnRH-antagonist	24.22	primary	Tubal	1	IVF	1.51	10.36	3.36	29.64	13.3	1	1401.3	4.9	0.24	11.8	6	4	2021-05-24 10:10:55	1	1	0	0
69	2021-05-29 09:10:16	0	38	GnRH-antagonist	27.39	primary	Tubal	13	IVF	2.29	6.64	3.28	23.95	11.61	2	2961.33	1.67	1.05	14.2	12	3	2021-06-03 11:38:06	1	1	0	0
70	2021-05-29 09:35:52	0	32	GnRH-antagonist	18.49	primary	Unexplained	2	IVF	7.13	6.49	7.29	77.2	10.46	1	1858.44	2.44	0.34	10.9	15	8	2021-06-03 11:32:22	1	1	0	1	intrauterine pregnancy		2022-02-01	37	Cesarean	male	3.6
71	2021-05-30 08:40:06	0	34	GnRH-antagonist	31.25	primary	Ovulatory	8	IVF	7.39	3.82	2.42	26.95	8.76	1	1722.08	4.37	0.37	13.6	9	7	2021-06-04 11:25:37	1	1	1	0
72	2021-06-01 09:30:31	0	31	GnRH-antagonist	20.03	secondary	male	7	IVF	3.39	4.93	2.74	57.36	19.74	1	1996.21	1.06	0.6	11	9	7	2021-06-06 11:35:10	1	1	0	1	intrauterine pregnancy		2022-02-13	38	Vaginal	male	3.3
73	2021-06-02 09:25:26	0	34	GnRH-antagonist	41.21	secondary	Tubal	1	IVF	4.61	5.97	2.86	33.78	16.83	4	4362.44	0.99	1.31	10	18	11	2021-06-07 10:40:56	1	1	0	0
74	2021-06-02 09:55:47	0	28	GnRH-antagonist	20.44	primary	Tubal	3	IVF	2.58	8.5	5.32	42.84	9.84	2	2557.76	1.93	0.34	11.3	11	5	2021-06-07 10:20:30	1	1	0	0
75	2021-06-02 10:10:39	0	28	GnRH-antagonist	18.9	primary	Ovulatory	6	ICSI	16.22	6.94	8.66	50.06	8.33	3	3656.07	2.38	0.42	14.6	18	6	2021-06-07 10:30:20	1	1	0	1	intrauterine pregnancy		2022-02-01	36	Vaginal	male	2.5
76	2021-06-05 08:55:04	0	29	GnRH-antagonist	25.71	primary	Unexplained	4	IVF	5.91	7.02	5.08	21.57	12.02	3	3887	2.95	1.06	9.4	8	5	2021-06-10 10:02:30	1	1	0	0
77	2021-06-09 08:45:14	0	33	GnRH-antagonist	17.48	primary	Unexplained	3	IVF	3.88	7.76	3.93	96.24	25.43	3	3886.66	1.55	1.22	8	15	4	2021-06-14 10:30:51	1	1	0	0
78	2021-06-10 09:00:30	1	30	GnRH-antagonist	24.03	primary	male	2	ICSI	10.547	6.87	5.61	25.73	9.92	2	2116.42	12.17	1.01	10.9	10	5	2021-06-15 10:31:58	1	1	0	0
79	2021-06-10 09:20:57	0	32	GnRH-antagonist	19.72	primary	male	1	ICSI	7.47	5.3	8.22	29.42	8.15	2	2242.39	1.01	0.34	12.7	13	7	2021-06-15 11:10:50	1	1	0	0
80	2021-06-11 08:25:56	0	38	GnRH-antagonist	22.1	primary	DOR	1	ICSI	0.86	12.31	3.76	26.36	19.25	1	1234.31	5.32	0.63	10.4	11	2	2021-06-16 11:30:47	1	1	0	1	intrauterine pregnancy		2022-02-21	38	Cesarean	male	3.6
81	2021-06-11 08:55:12	0	27	GnRH-antagonist	17.67	primary	Unexplained	3	IVF	8.7	7.16	7.02	36.59	14.09	4	4019.49	2.37	0.52	9.3	15	4	2021-06-16 10:35:27	1	1	0	0
82	2021-06-24 08:55:12	0	34	GnRH-antagonist	19.3	secondary	Tubal	3	IVF	2.42	4.83	3.85	14	18.27	3	3704.86	1.42	0.92	7.5	10	7	2021-06-29 10:10:40	1	1	0	1	ectopic pregnancy
83	2021-06-27 09:30:16	0	26	GnRH-antagonist	18.59	primary	male	1	ICSI	3.77	6.32	4.34	34.13	11.15	1	1665.5	1.34	0.4	11.8	10	6	2021-07-02 11:00:05	1	1	0	0
84	2021-06-27 09:55:57	0	23	GnRH-antagonist	15.81	secondary	Tubal	1	IVF	2.47	6.13	2.01	44.55	16.57	2	2183.22	0.37	0.64	8	14	10	2021-07-02 10:35:08	1	1	0	0
85	2021-06-30 08:55:30	0	29	GnRH-antagonist	18.59	primary	Unexplained	1	IVF	4.75	7.86	6.96	49.45	11.01	2	2297.82	2.33	0.46	10.9	9	5	2021-07-05 10:55:49	1	1	0	0
86	2021-06-30 09:05:26	0	40	GnRH-antagonist	27.24	secondary	Tubal	3	IVF	4.74	5.08	8.66	30.98	10.96	2	2047.73	4.79	0.56	8.8	13	4	2021-07-05 11:05:25	1	1	0	1	intrauterine pregnancy		2022-03-14	38	Vaginal	female	3.35
87	2021-07-08 09:20:14	0	35	GnRH-antagonist	17.15	secondary	Mixed	1	IVF	2.1	9.67	7.27	69.42	15.21	1	1739.83	2.45	0.47	9.7	8	4	2021-07-13 10:35:01	1	1	0	1	intrauterine pregnancy	yes
88	2021-07-09 09:10:42	0	31	GnRH-antagonist	20.5	secondary	Unexplained	3	IVF	1.79	7.37	2.32	18.2	12.44	1	1497.62	1.87	0.35	11.3	8	4	2021-07-14 11:00:07	1	1	0	1	intrauterine pregnancy		2022-04-03	40	Cesarean	female	2.94
89	2021-07-09 09:50:55	1	33	GnRH-antagonist	24.88	primary	Tubal	6	IVF	2.3	8.12	4.29	60.3	19.58	2	2922.92	2.45	0.71	9.7	15	5	2021-07-14 10:18:59	1	1	0	0
90	2021-07-10 09:05:50	0	34	GnRH-antagonist	21.16	secondary	Mixed	3	IVF	1.64	7.25	2.82	66.75	16.81	1	1241.87	1.92	0.21	10.9	10	4	2021-07-15 11:15:06	1	1	0	0
91	2021-07-10 09:20:42	0	29	GnRH-antagonist	22.37	primary	male	2	IVF	3.69	5.99	4.69	40.09	11.92	3	3473.6	2.06	0.17	12.6	11	9	2021-07-15 11:45:23	1	1	0	1	intrauterine pregnancy		2022-03-21	38	Cesarean	male	3.4
92	2021-07-10 09:35:46	0	26	GnRH-antagonist	44.54	primary	Mixed	5	ICSI	5.54	5.07	3.13	25	10.75	3	3334.02	2.01	0.71	13.3	16	11	2021-07-15 11:00:30	1	1	0	0
93	2021-07-11 09:15:49	0	31	GnRH-antagonist	18.82	secondary	Unexplained	3	IVF	3.05	6.27	5.45	37.56	16.48	1	1630.38	3.33	0.37	8.2	9	5	2021-07-16 10:20:46	1	1	0	1	intrauterine pregnancy	yes
94	2021-07-14 09:15:15	0	30	GnRH-antagonist	22.77	primary	Tubal	1	IVF	2.13	4.83	1.43	37.33	11.73	1	1854.92	1.31	0.82	10.7	10	7	2021-07-19 11:10:20	1	1	0	0
95	2021-07-21 09:10:25	0	31	GnRH-antagonist	23.63	primary	Tubal	12	IVF	2.88	4.03	2.72	27.7	12.6	1	1359.37	0.56	0.42	11.8	13	5	2021-07-26 10:30:00	1	1	0	0
96	2021-07-22 10:10:12	0	29	GnRH-antagonist	17.71	primary	male	2	ICSI	5.87	4.38	3.52	41.66	12.79	3	3176.68	2.03	0.46	14.9	17	7	2021-07-27 10:42:48	1	1	0	0
97	2021-07-23 09:10:16	0	32	GnRH-antagonist	25.95	primary	Ovulatory	4	IVF	11.02	4.72	5.39	38.15	8.43	2	2268.07	4.47	0.65	10.6	19	6	2021-07-28 11:00:21	1	1	0	0
98	2021-07-23 09:25:55	0	27	GnRH-antagonist	18	primary	Unexplained	2	IVF	4.87	5	6.83	55.02	13.77	2	2500.05	2.2	0.14	13.5	14	9	2021-07-28 11:10:23	1	1	0	0
99	2021-07-23 10:05:09	1	42	GnRH-antagonist	22.43	secondary	male	10	ICSI	1.73	7.03	0.95	28.71	17.09	1	606.7	0.57	0.5	8.3	13	4	2021-07-28 11:10:39	1	1	0	0
100	2021-07-30 09:25:55	0	35	GnRH-antagonist	19.22	primary	Endometriosis	2	IVF	3.18	6.79	1.89	10	18.37	2	2514.48	1.06	0.73	10.3	11	4	2021-08-04 10:14:08	1	1	0	1	intrauterine pregnancy		2022-04-12	38	Cesarean	male	2.5
101	2021-07-31 08:50:01	0	34	GnRH-antagonist	26.95	secondary	male	5	ICSI	2.27	6.55	2.99	37.61	12.58	2	2427.15	2.86	0.62	12.7	11	2	2021-08-05 10:35:21	1	1	0	0
102	2016-03-02 09:50	0	32	GnRH-antagonist	19.29	secondary	Mixed	5	IVF	NA	5.57	4.36	51.31	30.01	3	3660	3.03	1.19	10	18	0	2016-03-07	1	1	0	1	intrauterine pregnancy		2016-11-21	39	Cesarean	female	2.85
103	2016-03-03 09:35	0	32	GnRH-antagonist	18.73	primary	Tubal	3	IVF	NA	5.8	8.35	72.69	12.38	3	3798	5.28	1.22	12	11	0	2016-03-08	1	1	0	1	intrauterine pregnancy		2016-11-21	39	Vaginal	male	3.5
104	2016-03-04 09:40	0	33	GnRH-antagonist	20.31	primary	male	5	IVF	NA	5.4	5.35	39.23	8.53	4	5444	2.25	1.23	9.4	24	0	2016-03-09	1	1	0	0			- -
105	2016-03-04 09:55	0	41	GnRH-antagonist	24.46	secondary	Tubal	12	IVF	NA	7.14	5.08	21.83	8.31	2	2503	6.02	1.04	13	18	0	2016-03-09	2	0	0	0			- -
106	2016-03-23 09:15	0	32	GnRH-antagonist	25.63	primary	male	3	ICSI	NA	5.51	5.49	23.91	14.94	2	2742	1.9	1.17	9	10	0	2016-03-28	1	1	0	0			- -
107	2016-05-18 09:50	1	30	GnRH-antagonist	22.58	secondary	Mixed	1	ICSI	NA	5.67	9.65	31.94	11.8	3	3796	4.48	1.09	10	10	2	2016-05-23	2	1	0	1	intrauterine pregnancy		2017-01-04	34	Cesarean	male	2.1
108	2016-05-25 08:45	2	43	GnRH-antagonist	19.05	secondary	Tubal	10	IVF	NA	6.57	4.23	62.41	14.61	2	2827	2.02	0.762	15.5	13	4	2016-05-30	1	1	0	0			- -
109	2016-09-13 09:50	0	41	GnRH-antagonist	23.83	secondary	Mixed	9	ICSI	NA	4.7	5.7	60.24	8.66	1	1899	2.06	0.778	10.8	13	4	2016-09-18	1	1	0	1	intrauterine pregnancy	yes	- -
110	2016-09-14 09:05	0	29	GnRH-antagonist	20.03	primary	Tubal	5	IVF	NA	6.94	5.7	13.54	11.92	3	3220	1.32	0.999	9.2	16	4	2016-09-19	1	1	0	0			- -
111	2016-09-18 09:20	0	41	GnRH-antagonist	21.78	secondary	Tubal	1	IVF	NA	1.59	2.66	29.4	14.73	4	4688	2.22	0.531	12.3	14	0	2016-09-23	2	1	0	0			- -
112	2016-10-06 09:50	1	35	GnRH-antagonist	26.93	secondary	Mixed	1	IVF	NA	5	1.93	29.91	10.35	3	3418	4.09	0.738	6.8	16	2	2016-10-11	2	2	0	1	intrauterine pregnancy		2017-06-08	36	Vaginal	male	3.3
113	2016-10-19 09:10	0	29	GnRH-antagonist	22.03	secondary	Tubal	1	IVF	NA	6.71	5.84	38	14.54	2	2376	5.84	1.04	10.4	17	2	2016-10-24	2	2	0	0			- -
114	2017-01-07 09:20	0	26	GnRH-antagonist	16.8	primary	Mixed	2	IVF	NA	8.86	9.87	30.71	24.38	2	2874	1.99	1.36	13	15	0	2017-01-12	2	2	0	1	intrauterine pregnancy		2017-09-19	37	Vaginal	female	2.5
115	2017-02-17 10:16	0	30	GnRH-antagonist	16.02	primary	Tubal	2	IVF	NA	6.9	9.12	19.02	10.29	3	3180	7.97	1.31	10.6	13	0	2017-02-22	1	1	0	0			- -
116	2017-02-18 09:30	0	38	GnRH-antagonist	18.66	secondary	Tubal	6	IVF	NA	31.89	5.75	41.45	26.05	2	2631	3.17	1.18	8.8	7	0	2017-02-23	1	1	0	0			- -
117	2017-04-27 09:35	0	27	GnRH-antagonist	19.82	primary	male	0	IVF	NA	7.14	5.23	21.52	12.56	3	3446	3.96	0.95	11.4	17	2	2017-05-02	1	1	0	1	intrauterine pregnancy	yes	- -
118	2017-05-13 09:00	0	42	GnRH-antagonist	NA	secondary	Mixed	5	IVF	NA	10.47	4.99	16.64	15.05	2	2415	1.82	0.672	11	9	2	2017-05-18	1	1	0	1	intrauterine pregnancy	yes	- -
119	2017-05-15 10:15	0	27	GnRH-antagonist	21.76	primary	male	4	IVF	NA	6.34	6.39	14.6	7.76	1	1821	3.56	0.947	10.9	9	2	2017-05-20	2	2	0	1	intrauterine pregnancy		2018-01-24	34	Cesarean	female	2.3	female	2.6
120	2017-05-27 09:00	0	30	GnRH-antagonist	22.84	secondary	Mixed	3	IVF	NA	5.4	5.79	28.98	12.24	1	1757	3.03	0.831	10.6	18	2	2017-06-01	2	2	0	1	intrauterine pregnancy		2018-02-01	37	Cesarean	male	3	male	2.85
121	2017-06-03 09:45	0	30	GnRH-antagonist	20.03	primary	Mixed	3	IVF	NA	6.03	9	23.08	14.6	3	3226	3.08	1.25	11.2	19	2	2017-06-08	1	1	0	0			- -
122	2017-06-16 09:45	0	27	GnRH-antagonist	22.89	primary	Mixed	1	IVF	NA	6.12	5.25	33.5	18.61	1	1609	5.7	0.788	12	9	0	2017-06-21	1	1	0	0			- -
123	2017-06-20 10:10	1	34	GnRH-antagonist	24.74	secondary	Tubal	1	IVF	NA	4.78	4.71	26.51	8.38	2	2350	3.02	0.94	10.1	15	0	2017-06-25	2	1	0	0			- -
124	2017-07-23 08:50	0	32	GnRH-antagonist	24.01	secondary	Tubal	5	IVF	NA	3.96	2.51	18.25	14.24	2	2712	1	1.27	11.9	11	0	2017-07-28	1	1	0	1	intrauterine pregnancy		2018-04-17	38	Cesarean	male	2.5
125	2017-07-25 09:50	0	33	GnRH-antagonist	19.53	secondary	Tubal	0	IVF	NA	7.36	3.21	33.81	17.31	1	1790	1.15	0.831	11.2	13	2	2017-07-30	2	2	0	1	intrauterine pregnancy		2018-02-12	31	Cesarean	male	1.6
126	2017-08-03 08:45	0	26	GnRH-antagonist	19.98	primary	Tubal	2	IVF	NA	6.31	3.87	21.89	13.73	2	2635	0.783	1.41	9.8	18	2	2017-08-08	2	2	0	0			- -
127	2017-08-03 09:00	0	39	GnRH-antagonist	19.23	secondary	Tubal	7	IVF	NA	7.51	3.32	40.7	16.37	2	2063	1.32	0.724	8.8	7	2	2017-08-08	2	1	0	1	intrauterine pregnancy		2018-04-24	39	Cesarean	female	3.2
128	2017-08-10 09:05	0	32	GnRH-antagonist	26.37	primary	Tubal	8	IVF	NA	5.07	2.33	45	10.47	1	1813	5.99	0.53	9.8	8	0	2017-08-15	2	2	0	1	intrauterine pregnancy		2018-05-01	39	Vaginal	female	3.5
129	2017-08-11 09:05	1	36	GnRH-antagonist	20.58	secondary	Mixed	1	IVF	NA	3.37	3.05	67.37	14.02	2	2794	2.24	1.26	8.5	14	2	2017-08-16	1	1	0	0			- -
130	2017-08-13 09:20	0	34	GnRH-antagonist	24.22	secondary	male	1	IVF	NA	5.02	3.26	28	9.57	1	1451	2.29	1	13.4	8	0	2017-08-18	1	1	0	1	intrauterine pregnancy		2018-04-26	38	Cesarean	female	3.2
131	2017-08-17 08:50	0	26	GnRH-antagonist	20.03	primary	Tubal	1	IVF	NA	7.4	6.66	34.25	15.48	3	3250	2.24	1.01	12.7	16	2	2017-08-22	2	1	0	0			- -
132	2017-08-29 09:00	0	31	GnRH-antagonist	20.83	primary	Tubal	3	IVF	NA	7.27	6.44	42.57	12.18	2	2197	1.5	0.617	10.3	14	2	2017-09-03	2	2	0	1	intrauterine pregnancy		2018-05-08	37	Vaginal	female	2.85
133	2017-09-02 09:55	0	34	GnRH-antagonist	23.62	secondary	Tubal	1	IVF	NA	5.05	4.45	26.86	16.44	2	2341	3.2	0.217	6.6	7	0	2017-09-07	2	2	0	1	intrauterine pregnancy		2018-05-07	36	Cesarean	female	2.6
134	2017-09-06 09:10	0	33	GnRH-antagonist	21.99	secondary	male	0	IVF	NA	6.26	3.54	68.48	11.97	2	2438	3.22	0.172	10.6	12	2	2017-09-11	1	1	0	1	intrauterine pregnancy		2018-05-08	36	Cesarean	male	2.85	male	2.05
135	2017-09-10 09:10	0	37	GnRH-antagonist	18.34	primary	male	8	IVF	NA	5.39	6.05	55.32	11.86	2	2522	3.44	0.796	12.9	23	0	2017-09-15	1	1	0	1	intrauterine pregnancy		2018-06-02	39	Vaginal	male	3.5
136	2017-09-13 09:00	0	24	GnRH-antagonist	18.4	secondary	Tubal	3	IVF	NA	6.5	6.62	22.31	13.38	1	1742	3.4	0.603	9.6	11	2	2017-09-18	2	2	0	0			- -
137	2017-10-18 08:50	0	35	GnRH-antagonist	17.78	primary	male	5	ICSI	NA	3.79	7.62	17.98	11.6	3	3002	4.29	0.318	9.5	11	0	2017-10-23	1	1	0	1	intrauterine pregnancy		2018-07-05	39	Vaginal	female	3.0
138	2017-10-20 08:40	1	25	GnRH-antagonist	29.14	primary	male	3	ICSI	NA	11.03	8.96	33.43	12.41	2	2980	5.53	0.371	10.9	15	0	2017-10-25	1	1	0	0			- -
139	2017-12-14 08:50	0	36	GnRH-antagonist	22.66	secondary	male	1	IVF	1.557	6.8	6.2	33.67	12.58	2	2711	5.54	0.893	10.4	21	2	2017-12-19	2	1	0	1	intrauterine pregnancy		2018-07-31	34	Cesarean	male	2.43	female	2.41
140	2017-12-14 09:25	0	35	GnRH-antagonist	20.7	secondary	Tubal	1	IVF	0.626	7.36	5.64	35.7	17.58	1	1148	2.77	0.206	9.2	5	0	2017-12-19	1	1	0	0			- -
141	2017-12-29 09:30	2	41	GnRH-antagonist	23.73	secondary	Mixed	15	IVF	NA	7.85	8.9	77.27	13.57	2	2008	4.24	0.22	10.2	12	0	2018-01-03	1	1	0	0			- -
142	2017-12-29 09:45	1	42	GnRH-antagonist	19.53	secondary	male	13	IVF	0.238	17.65	9.05	40.62	17.59	3	3606	6.88	0.67	11.6	9	0	2018-01-03	1	1	0	0			- -
143	2017-12-29 10:15	0	41	GnRH-antagonist	20.2	secondary	Tubal	1	IVF	3.02	2.58	3.54	NA	17.44	3	3672	1.36	1.17	11.6	17	4	2018-01-03	1	1	0	1	intrauterine pregnancy		2018-09-11	38	Cesarean	male	3.1
144	2018-01-14 09:36	0	27	GnRH-antagonist	17.48	secondary	Tubal	6	IVF	2.75	5.2	2.72	37	12.47	2	2799	2.51	0.299	8.2	8	2	2018-01-19	1	1	0	1	intrauterine pregnancy		2018-10-03	39	Vaginal	female	2.7
145	2018-01-18 09:50	0	36	GnRH-antagonist	28	secondary	Tubal	2	IVF	2.746	4.64	2.47	25.92	7.14	2	2413	3.52	0.692	9.1	13	2	2018-01-23	1	1	0	0			- -
146	2018-01-25 09:23	1	35	GnRH-antagonist	22.49	primary	male	1	ICSI	2.639	10.42	7.31	46.31	14.08	2	2085	3.45	0.412	10.4	12	2	2018-01-30	2	2	0	1	intrauterine pregnancy		2018-10-01	37	Cesarean	male	2.5
147	2018-01-31 10:10	0	31	GnRH-antagonist	19.48	secondary	male	6	IVF	6.424	8.77	6.31	32.12	13.59	3	3420	5.39	1.33	10.8	12	2	2018-02-05	1	1	0	0			- -
148	2018-02-02 09:00	0	27	GnRH-antagonist	19.29	primary	male	1	ICSI	9.09	7.13	7.67	29.32	10.14	2	2814	8.09	0.523	8.5	14	2	2018-02-07	1	1	0	0			- -
149	2018-03-07 08:40	0	29	GnRH-antagonist	16.94	secondary	Tubal	1	IVF	1.098	11.3	4.86	27.36	20.25	1	938.7	1.94	0.565	9.2	7	0	2018-03-12	1	1	0	1	intrauterine pregnancy		2018-11-13	37	Vaginal	male	2.85
150	2018-03-09 08:55	1	39	GnRH-antagonist	23.5	primary	Mixed	1	IVF	NA	5.63	2.6	23.34	10.89	1	1954	4.04	0.791	10	13	2	2018-03-14	1	1	0	1	intrauterine pregnancy	yes	- -
151	2018-04-01 09:40	2	39	GnRH-antagonist	19.73	primary	Tubal	4	IVF	0.724	11.93	4.32	28.63	18.7	2	2441	2.7	0.974	12.8	4	0	2018-04-06	1	1	0	0			- -
152	2018-04-06 08:40	0	37	GnRH-antagonist	NA	secondary	Mixed	2	IVF	3.559	5.75	2.05	55.82	10.61	2	2382	2.2	0.551	10.1	13	2	2018-04-11	1	1	0	1	intrauterine pregnancy		2018-12-19	38	Vaginal	male	2.75
153	2018-04-06 08:55	1	29	GnRH-antagonist	22.89	primary	Tubal	9	IVF	NA	8.1	3.61	14.26	13.19	1	1541	5.79	0.652	12.9	8	2	2018-04-11	1	1	0	1	intrauterine pregnancy		2018-11-30	35	Vaginal	male	2.68
154	2018-04-06 09:45	0	31	GnRH-antagonist	30.82	secondary	Tubal	2	IVF	11.573	5.65	4.87	30.28	8.35	3	3186	3.5	1.1	10.2	15	2	2018-04-11	2	2	0	1	intrauterine pregnancy		2018-11-22	34	Cesarean	male	2.85	female	2.65
155	2018-04-08 09:05	0	32	GnRH-antagonist	24.09	secondary	male	4	ICSI	1.24	6.49	3.61	62	17.28	2	2589	3.91	0.854	11.9	11	0	2018-04-13	1	1	0	0			- -
156	2018-04-09 09:16	0	37	GnRH-antagonist	23.92	secondary	Tubal	3	IVF	1.52	6.06	4.77	67.72	14.58	3	3010	3.42	0.503	8.8	9	2	2018-04-14	1	1	0	1	intrauterine pregnancy		2019-01-05	39	Vaginal	male	3
157	2018-04-17 10:15	1	37	GnRH-antagonist	23.44	primary	Unexplained	1	IVF	0.776	6.1	3.17	40.48	18.06	1	1059	1.91	0.373	10.9	12	0	2018-04-22	2	2	0	1	intrauterine pregnancy		2019-01-07	39	Vaginal	male	3.4
158	2018-04-25 09:30	0	28	GnRH-antagonist	19.92	secondary	Ovulatory	1	IVF	4.241	5.02	5.83	29.77	13.39	3	3638	4.54	0.869	10.3	14	0	2018-04-30	1	1	0	0			- -
159	2018-04-26 09:50	0	28	GnRH-antagonist	20.31	secondary	Tubal	1	IVF	5.199	5.96	5.25	55.56	17.25	3	3156	1.6	0.49	9.6	16	0	2018-05-01	1	1	0	1	intrauterine pregnancy	yes	- -
160	2018-05-09 08:50	0	24	GnRH-antagonist	22.58	secondary	Tubal	1	IVF	3.306	5.27	5.79	34.3	12.19	2	2010	2.18	1.08	8	14	2	2018-05-14	2	2	0	1	intrauterine pregnancy		2019-01-08	36	Cesarean	female	2.7	female	2.5
161	2018-05-11 09:15	0	32	GnRH-antagonist	20.7	primary	Tubal	5	IVF	7.791	5.71	4.87	38.61	11.22	2	2523	3.18	0.399	8.5	13	2	2018-05-16	1	1	0	0			- -
162	2018-05-13 09:10	1	40	GnRH-antagonist	23.59	secondary	Tubal	6	IVF	1.841	8.77	2.13	49.63	19.68	2	2656	3.05	0.492	13	7	2	2018-05-18	2	1	0	1	intrauterine pregnancy	yes	- -
163	2018-05-18 09:30	0	27	GnRH-antagonist	19.47	secondary	Tubal	2	IVF	6.984	6.5	4.41	20.95	11.8	2	2213	2.77	0.402	11	14	2	2018-05-23	2	2	0	0			- -
164	2018-05-19 08:50	0	27	GnRH-antagonist	18.36	primary	Ovulatory	2	IVF	15.856	4	8.66	50.21	7.48	3	3934	2.63	0.237	11.4	14	2	2018-05-24	1	1	0	1	intrauterine pregnancy		2019-01-29	37	Vaginal	female	3.02
165	2018-05-24 09:25	0	29	GnRH-antagonist	18.73	primary	male	2	ICSI	3.836	8.4	4.57	18.43	12.99	2	2192	6.24	0.295	8.8	10	0	2018-05-29	1	1	0	1	intrauterine pregnancy		2019-02-13	39	Vaginal	male	3.34
166	2018-05-31 09:00	0	28	GnRH-antagonist	17.97	secondary	male	1	IVF	6.177	5.79	7.16	36.73	18.69	2	2867	2.85	0.394	13.7	12	2	2018-06-05	1	1	0	1	intrauterine pregnancy	yes	- -
167	2018-06-02 09:36	0	35	GnRH-antagonist	20.69	secondary	Tubal	2	IVF	1.008	5.86	3.67	48.98	12.46	1	1116	2.13	0.304	11.5	7	0	2018-06-07	1	1	0	1	intrauterine pregnancy		2019-01-30	36	Cesarean	female	2.6
168	2018-06-04 08:45	0	24	GnRH-antagonist	20.2	primary	Ovulatory	5	IVF	9.041	8.13	6.57	39.85	8.78	3	3063	1.39	0.233	12.7	12	2	2018-06-09	1	1	0	0			- -
169	2018-06-04 09:50	0	32	GnRH-antagonist	16.65	secondary	Tubal	1	IVF	NA	7.86	5.56	21.5	12.89	3	3246	2.46	0.448	9.9	16	2	2018-06-09	1	1	0	1	intrauterine pregnancy		2019-02-02	36	Vaginal	female	2.9
170	2018-06-16 09:50	0	32	GnRH-antagonist	23.59	secondary	Tubal	1	IVF	5.717	5.7	5.68	16.6	10.26	2	2415	3.23	0.493	12.6	18	2	2018-06-21	1	1	0	1	intrauterine pregnancy		2019-02-19	37	Vaginal	male	3.4
171	2018-06-21 10:50	0	31	GnRH-antagonist	21.83	secondary	Tubal	2	IVF	5.008	8.09	6.18	45.03	15.02	3	3525	1.92	0.737	13.8	18	2	2018-06-26	2	2	0	1	intrauterine pregnancy		2019-03-12	39	Cesarean	male	3.25
172	2018-06-28 09:20	1	30	GnRH-antagonist	26.04	secondary	Tubal	1	IVF	8.385	4.56	7.45	34.69	7.43	3	3910	2.19	0.842	9	18	2	2018-07-03	1	1	0	0			- -
173	2018-06-28 09:43	0	44	GnRH-antagonist	21.49	secondary	Tubal	7	IVF	4.55	11.14	5.14	74.6	29.29	3	3260	5.47	0.566	12.9	13	0	2018-07-03	1	1	0	1	intrauterine pregnancy		2019-02-25	36	Cesarean	male	3.18
174	2018-07-06 10:30	0	36	GnRH-antagonist	18.36	secondary	Tubal	1	IVF	7.07	8.19	6.78	35.39	16.22	3	3505	6.35	0.706	12	17	2	2018-07-11	1	1	0	0			- -
175	2018-07-07 09:45	0	33	GnRH-antagonist	22.9	primary	Tubal	3	IVF	5.274	6.28	6.14	40.02	12.99	2	2589	3.07	0.589	9.9	12	2	2018-07-12	1	1	0	1	intrauterine pregnancy		2019-03-05	36	Cesarean	male	2.9
176	2018-07-15 09:05	2	42	GnRH-antagonist	21.23	secondary	Tubal	6	IVF	NA	7.21	4.71	20.58	16.85	1	932.8	4.62	0.346	8	3	0	2018-07-20	1	1	0	0			- -
177	2018-07-19 08:50	0	27	GnRH-antagonist	23.56	primary	Tubal	4	IVF	1.886	5.74	8.37	33.06	13.29	3	3704	2	0.616	19.3	11	2	2018-07-24	1	1	0	0			- -
178	2018-07-24 09:10	0	30	GnRH-antagonist	22.66	secondary	Tubal	3	IVF	2.412	5.98	4.43	37.89	11.45	1	1693	4.37	1.08	8.2	14	2	2018-07-29	2	1	0	0			- -
179	2018-07-25 09:00	1	28	GnRH-antagonist	23.31	primary	Tubal	5	IVF	NA	10.47	4.99	58.71	12.81	1	1174	0.822	0.509	9.8	12	2	2018-07-30	1	1	0	1	intrauterine pregnancy	yes	- -
180	2018-08-05 10:55	0	21	GnRH-antagonist	20	secondary	Tubal	2	IVF	9.752	6.82	5.31	40.68	8.94	2	2142	3.23	0.613	8.8	12	2	2018-08-10	1	1	0	1	intrauterine pregnancy		2019-04-17	37	Vaginal	male	3
181	2018-08-10 09:30	0	31	GnRH-antagonist	23.11	secondary	Tubal	4	IVF	5	5.75	4.79	40.1	7.92	1	1382	1.06	0.514	10.8	12	2	2018-08-15	1	1	0	1	intrauterine pregnancy		2019-04-11	36	Cesarean	male	2.4
182	2018-08-14 09:46	0	38	GnRH-antagonist	19.78	secondary	Tubal	1	IVF	NA	7.78	6.99	39.93	14.29	3	3708	3.84	0.593	8.6	20	2	2018-08-19	1	1	0	1	intrauterine pregnancy		2019-05-05	39	Vaginal	male	3.05
183	2018-08-17 08:52	0	32	GnRH-antagonist	18.66	primary	Ovulatory	7	IVF	7.701	6.55	3.44	12.05	10.03	2	2160	1.55	0.685	12.6	24	2	2018-08-22	1	1	0	0			- -
184	2018-08-22 09:52	0	41	GnRH-antagonist	25	secondary	male	1	IVF	6.881	4.44	5.71	67.91	7.55	2	2970	6.68	0.484	7.4	16	2	2018-08-27	1	1	0	1	intrauterine pregnancy	yes	- -
185	2018-08-24 10:15	1	37	GnRH-antagonist	23.44	primary	Tubal	8	IVF	2.719	6.12	3.81	23.23	15.38	3	3017	3.6	0.468	9.4	7	2	2018-08-29	1	1	0	0			- -
186	2018-08-24 10:20	0	25	GnRH-antagonist	17.19	primary	male	1	ICSI	5.549	7.6	7.98	33	10.11	3	3387	2.32	0.952	9	17	2	2018-08-29	1	1	0	1	intrauterine pregnancy		2019-04-25	36	Vaginal	male	3
187	2018-08-24 10:55	0	30	GnRH-antagonist	17.01	secondary	Endometriosis	5	IVF	7.536	7.18	9.09	40.97	8.81	2	2304	2.01	0.714	9.6	8	2	2018-08-29	1	1	0	1	intrauterine pregnancy		2019-05-05	38	Vaginal	female	2.55
188	2018-08-26 09:40	0	27	GnRH-antagonist	27.89	primary	Mixed	2	IVF	5.538	6.67	5.08	16.55	10.33	2	2677	4.4	0.424	10.4	19	2	2018-08-31	1	1	0	1	intrauterine pregnancy		2019-05-16	39	Cesarean	male	3.9
189	2018-08-27 09:20	0	26	GnRH-antagonist	21.63	primary	male	2	IVF	4.794	5.09	5.98	36.92	11.73	3	3062	3.44	0.564	12.5	13	2	2018-09-01	1	1	1	1	intrauterine pregnancy		2019-05-13	39	Cesarean	female	2.8
190	2018-08-30 08:43	0	36	GnRH-antagonist	20.66	secondary	male	3	ICSI	8.824	5.71	7.32	52.97	10.67	2	2735	6.22	0.994	10.5	19	2	2018-09-04	1	1	0	0			- -
191	2018-09-01 09:15	0	31	GnRH-antagonist	29.69	primary	Ovulatory	4	IVF	5.46	5.07	3.31	27.7	10.48	1	1622	5.79	0.615	11.7	14	2	2018-09-06	1	1	0	0			- -
192	2018-09-05 09:50	1	27	GnRH-antagonist	19.23	secondary	male	3	IVF	4.57	7.81	8.9	40.87	10.17	4	4128	11.17	0.845	10.8	6	2	2018-09-10	1	1	0	1	intrauterine pregnancy		2019-05-23	38	Vaginal	male	3.45
193	2018-09-07 09:30	1	30	GnRH-antagonist	22.03	primary	male	2	IVF	6.76	6.75	5.99	28.07	11.11	3	3365	4.87	0.763	10.7	12	2	2018-09-12	1	1	0	0			- -
194	2018-09-13 09:25	0	27	GnRH-antagonist	19.56	secondary	Tubal	2	IVF	8.769	7.65	9.93	40.59	8.74	3	3106	3.3	0.313	9.8	8	2	2018-09-18	1	1	0	0			- -
195	2018-09-14 10:02	1	36	GnRH-antagonist	20.96	secondary	Mixed	3	IVF	2.29	6.28	4.84	36.81	10.2	2	2973	2.42	0.506	8.7	18	2	2018-09-19	1	1	0	1	intrauterine pregnancy		2019-05-23	37	Cesarean	female	3.1
196	2018-09-19 08:55	0	35	GnRH-antagonist	20.55	secondary	male	2	ICSI	3.839	4.38	2.58	33.51	12.92	3	3364	3.8	0.835	8.8	13	2	2018-09-24	1	1	0	0			- -
197	2018-09-21 10:35	0	29	GnRH-antagonist	20.08	primary	male	6	ICSI	4.425	8.23	4.04	44.45	13.54	1	1576	2	1.08	12.3	6	2	2018-09-26	1	1	0	0			- -
198	2018-09-21 11:15	0	31	GnRH-antagonist	20.03	secondary	male	5	ICSI	2.87	3.94	2.64	27.52	9.9	2	2114	2.04	0.666	11.5	14	2	2018-09-26	1	1	0	0			- -
199	2018-09-22 09:30	0	27	GnRH-antagonist	17.97	primary	male	2	ICSI	2.373	7.86	6.07	79.57	12.4	2	2399	2.23	0.393	10.5	9	2	2018-09-27	1	1	0	1	intrauterine pregnancy		2019-06-10	39	Vaginal	male	3.3
200	2018-09-27 10:15	0	29	GnRH-antagonist	18.03	primary	Tubal	2	IVF	5.086	6.84	5.88	51.69	16.3	3	3484	5.48	0.724	9.3	18	2	2018-10-02	1	1	0	1	intrauterine pregnancy		2019-06-18	39	Cesarean	male	3.5
201	2018-10-02 09:22	0	32	GnRH-antagonist	21.22	secondary	Tubal	6	IVF	5.05	6.55	4	26.58	10.17	2	2872	1.35	1.33	12	16	2	2018-10-07	1	1	0	1	intrauterine pregnancy		2019-06-18	39	Cesarean
202	2018-10-04 09:46	0	28	GnRH-antagonist	17.78	primary	Tubal	3	IVF	15.16	7.04	5.44	48.93	6.62	2	2017	3	0.515	12.2	7	2	2018-10-09	1	1	0	0			- -
203	2018-10-06 09:30	0	36	GnRH-antagonist	19.82	secondary	Tubal	2	IVF	1.283	7.93	5.24	54.43	21.23	1	1580	3.73	0.69	10.7	8	2	2018-10-11	1	1	0	1	intrauterine pregnancy		2019-06-18	37	Cesarean	male	3.25
204	2018-10-08 09:10	0	38	GnRH-antagonist	26.04	secondary	male	6	ICSI	3.7	9.13	7.78	55	11.07	2	2605	5	0.562	9.3	16	2	2018-10-13	1	1	0	1	intrauterine pregnancy		2019-06-25	39	Cesarean	female	3.4
205	2018-10-09 10:50	1	27	GnRH-antagonist	17.09	primary	male	3	IVF	8.559	7.46	7.33	67.7	10.3	3	3504	2.9	0.688	10.4	15	2	2018-10-14	1	1	0	0			- -
206	2018-10-14 09:00	1	33	GnRH-antagonist	22.66	secondary	male	2	ICSI	NA	6.64	3.48	37.58	12.81	3	3515	3.14	0.582	12.6	10	2	2018-10-19	1	1	0	1	intrauterine pregnancy		2019-07-17	40	Cesarean	male	3.885
207	2018-10-16 08:50	0	31	GnRH-antagonist	18.65	secondary	Tubal	2	IVF	7.037	6.34	5.27	54.7	15.11	3	3360	0.974	1.39	11.6	12	2	2018-10-21	1	1	0	0			- -
208	2018-10-20 08:43	0	33	GnRH-antagonist	29.73	secondary	Tubal	2	IVF	6.22	2.89	4.14	73	8.96	2	2775	23.8	1.41	11	10	2	2018-10-25	1	1	0	0			- -
209	2018-10-20 09:45	0	30	GnRH-antagonist	28.67	primary	Tubal	0	IVF	6.25	5.3	2.87	27	11.4	3	3749	7.97	0.722	11.1	18	2	2018-10-25	1	1	0	1	intrauterine pregnancy	yes	- -
210	2018-10-21 09:00	0	35	GnRH-antagonist	25.22	secondary	male	0	IVF	3.21	5.31	4.38	40.13	12.2	4	4033	4.93	1.14	9.5	10	2	2018-10-26	2	2	0	0			- -
211	2018-10-21 09:10	0	31	GnRH-antagonist	22.86	secondary	Tubal	6	IVF	5.828	7.64	5.45	57.85	9.75	3	3148	3.44	0.442	13.9	9	1	2018-10-26	1	1	0	0			- -
212	2018-10-21 09:30	0	31	GnRH-antagonist	21.23	secondary	male	1	IVF	13.586	5.57	6.7	71.25	8.08	4	4619	6.1	0.681	7.8	15	2	2018-10-26	1	1	0	0
213	2018-10-24 09:15	0	21	GnRH-antagonist	24.22	primary	male	1	ICSI	NA	5.3	7.39	31.07	10.04	1	1819	0.887	0.19	11.2	15	2	2018-10-29	1	1	0	0			- -
214	2018-10-29 09:46	1	27	GnRH-antagonist	22.58	primary	male	2	IVF	4.166	4.62	3.59	37.17	12.35	3	3355	2.5	0.972	11.8	17	2	2018-11-03	1	1	0	0			- -
215	2018-11-02 09:50	0	24	GnRH-antagonist	25.39	primary	male	4	ICSI	8.816	5.56	5.39	33.49	10.48	2	2281	3.37	0.526	14.3	10	2	2018-11-07	1	1	0	1	intrauterine pregnancy	yes	- -
216	2018-11-03 09:45	1	32	GnRH-antagonist	19.53	secondary	Tubal	1	IVF	11.941	7.71	6.84	29.63	11.25	2	2145	1.74	0.852	11	12	2	2018-11-08	1	1	0	0			- -
217	2018-11-03 09:55	1	30	GnRH-antagonist	20.03	primary	male	3	ICSI	4.3	8.16	3.14	61.13	18.09	2	2572	2.78	0.681	10.4	12	2	2018-11-08	1	1	0	0			- -
218	2018-11-03 10:10	0	29	GnRH-antagonist	18.78	primary	male	3	ICSI	11.987	7.11	9.25	50.99	9.03	3	3458	2.56	0.319	10	15	2	2018-11-08	1	1	0	0			- -
219	2018-11-03 10:20	0	24	GnRH-antagonist	19.82	primary	male	3	ICSI	5.543	9.29	6.97	42.4	8.01	1	1111	1.83	0.403	11.7	6	1	2018-11-08	1	1	0	1	intrauterine pregnancy		2019-07-21	39	Vaginal	female	2.9
220	2018-11-07 09:20	0	32	GnRH-antagonist	22.6	secondary	Tubal	0	IVF	2.027	5.17	3.88	29.62	15.91	2	2475	8.14	0.786	11	9	1	2018-11-12	1	1	0	1	intrauterine pregnancy		2019-07-22	38	Vaginal	female	3.3
221	2018-11-07 09:32	0	35	GnRH-antagonist	20.4	primary	male	1	ICSI	4.353	5.48	3.64	43.59	12.61	2	2073	1.82	0.807	11.2	9	1	2018-11-12	1	1	0	1	intrauterine pregnancy	yes	- -
222	2018-11-07 09:50	0	20	GnRH-antagonist	19.71	primary	Tubal	3	IVF	7.044	8.21	8.34	16.55	12.35	2	2887	3.07	1.01	12.7	10	1	2018-11-12	1	1	0	0			- -
223	2018-11-11 09:25	1	26	GnRH-antagonist	18.87	secondary	Endometriosis	2	IVF	1.031	7.74	4.87	80.11	13.25	2	2714	3.54	0.585	8.9	7	0	2018-11-16	1	1	0	0			- -
224	2018-11-11 09:35	0	26	GnRH-antagonist	16.8	secondary	Tubal	1	IVF	2.294	8.65	6.35	37.74	11.56	2	2320	5.16	0.43	10	11	2	2018-11-16	1	1	0	0			- -
225	2018-11-14 09:40	0	28	GnRH-antagonist	18.49	primary	male	2	IVF	NA	6.43	4.48	43.07	18.51	1	1985	1.17	1.19	9.3	19	2	2018-11-19	1	1	0	0			- -
226	2018-11-18 08:50	0	29	GnRH-antagonist	20	primary	Tubal	2	IVF	3.57	8.9	4.58	34.6	16.03	1	1887	1.77	1.09	11.3	5	0	2018-11-23	1	1	0	0			- -
227	2018-11-18 09:20	0	26	GnRH-antagonist	26.04	secondary	Tubal	3	IVF	5.33	6.36	5.11	23.09	9.7	2	2612	3.71	0.222	10.4	18	2	2018-11-23	1	1	0	1	intrauterine pregnancy		2019-08-18	40	Vaginal	male	3.31
228	2018-11-19 08:46	0	29	GnRH-antagonist	20.45	primary	Tubal	1	IVF	2.235	4.93	3.29	35.82	15.66	3	3941	1.68	1.19	10.9	19	2	2018-11-24	1	1	0	0			- -
229	2018-11-19 09:26	0	31	GnRH-antagonist	16.63	secondary	Endometriosis	1	IVF	3.718	2.55	3.53	59.4	14.65	4	4227	1.47	0.971	14.7	10	2	2018-11-24	1	1	0	1	intrauterine pregnancy		2019-07-27	37	Cesarean	female	3.05
230	2018-11-22 10:00	0	33	GnRH-antagonist	22.86	primary	Tubal	8	IVF	4.368	5.32	4.01	24.58	18.57	3	3164	1.08	1.28	9.1	12	2	2018-11-27	1	1	0	1	intrauterine pregnancy		2019-08-17	40	Cesarean	male	3.5
231	2018-11-24 08:45	0	31	GnRH-antagonist	20.51	primary	male	3	ICSI	5.214	6.91	4.98	42.09	8.87	2	2499	3.29	0.513	10.7	11	2	2018-11-29	1	1	0	1	intrauterine pregnancy	yes	- -
232	2018-11-25 09:30	0	27	GnRH-antagonist	25.56	secondary	Tubal	3	IVF	NA	6.18	3.6	25.9	9.8	1	1329	1.78	0.506	13.5	13	2	2018-11-30	1	1	0	1	intrauterine pregnancy		2019-08-15	39	Cesarean	female	3.8
233	2018-11-26 09:46	0	26	GnRH-antagonist	19.38	secondary	Tubal	2	IVF	11.75	6.8	4.4	39.3	7.65	2	2875	4.3	0.202	12.8	15	2	2018-12-01	1	1	0	1	intrauterine pregnancy		2019-08-22	40	Vaginal	female	3.25
234	2018-11-28 08:56	0	31	GnRH-antagonist	24.03	primary	male	4	IVF	3.047	6.03	2.64	32.07	13.53	3	3299	2.91	0.713	10.4	22	2	2018-12-03	1	1	0	0			- -
235	2018-11-30 09:26	0	33	GnRH-antagonist	20.17	primary	Tubal	1	IVF	20	4.85	4.95	33.25	8.73	3	3496	7.95	0.765	12	12	0	2018-12-05	1	1	0	1	intrauterine pregnancy		2019-07-24	35	Cesarean	male	3.2
236	2018-12-02 09:40	0	30	GnRH-antagonist	21.48	secondary	Ovulatory	3	IVF	5.705	4.95	3.27	18	13.81	1	1711	1.06	0.689	10.3	17	0	2018-12-07	1	1	0	0			- -
237	2018-12-04 10:05	0	29	GnRH-antagonist	23.44	secondary	Tubal	1	IVF	NA	7.31	5.86	24.45	10.12	2	2564	2.92	0.682	6.7	9	1	2018-12-09	1	1	0	0			- -
238	2018-12-09 09:05	0	21	GnRH-antagonist	26.22	primary	Unexplained	2	IVF	5.627	4.29	9.34	53	6.66	1	1490	2.23	0.216	13	10	2	2018-12-14	1	1	0	1	intrauterine pregnancy		2019-09-05	40	Vaginal	male	3.55
239	2018-12-09 09:35	0	30	GnRH-antagonist	19.47	primary	male	3	IVF	8.16	5.51	8.72	28.16	7.92	2	2514	2.65	0.178	9.7	12	2	2018-12-14	1	1	0	0			- -
240	2018-12-10 10:05	0	27	GnRH-antagonist	20.03	primary	Tubal	3	IVF	8.95	6.77	6.1	29.56	8.42	2	2092	6.75	0.182	11.3	9	1	2018-12-15	1	1	0	1	intrauterine pregnancy	yes	- -
241	2018-12-11 09:55	1	39	GnRH-antagonist	22.89	primary	Unexplained	14	IVF	1.422	5.95	4.83	19.85	14.74	3	3284	3.5	0.784	13.7	10	2	2018-12-16	1	0	0	0			- -
242	2018-12-11 10:10	0	27	GnRH-antagonist	22.31	primary	male	3	ICSI	14.582	4.78	4.36	46.68	6.12	4	4023	4.68	0.461	8.8	14	2	2018-12-16	1	1	0	0			- -
243	2018-12-12 10:03	0	40	GnRH-antagonist	30.48	secondary	Tubal	11	IVF	1.739	6.6	2.49	31.79	13.25	2	2068	1.24	0.885	9.4	11	2	2018-12-17	1	1	0	0			- -
244	2018-12-13 10:00	0	36	GnRH-antagonist	17.58	secondary	Tubal	5	IVF	8.883	5.87	5.23	47.19	8.72	1	1595	3.31	0.434	9.1	9	2	2018-12-18	1	1	0	0			- -
245	2018-12-13 10:10	0	29	GnRH-antagonist	25.36	primary	male	4	IVF	1.018	7.9	2.54	8.7	7.66	1	1195	2.21	0.082	11.9	7	1	2018-12-18	1	1	0	1	intrauterine pregnancy		2019-08-24	38	Vaginal	male	3.2
246	2018-12-14 08:40	0	36	GnRH-antagonist	23.44	secondary	Tubal	9	IVF	3.45	5.46	5.14	38.71	10.51	2	2058	6.56	0.928	7.6	10	2	2018-12-19	1	1	0	1	intrauterine pregnancy		2019-08-26	38	Cesarean	male	3.5
247	2018-12-16 09:35	0	27	GnRH-antagonist	24.97	secondary	Tubal	1	IVF	6.47	5.45	5.81	50.79	9.08	3	3561	4.68	0.63	8.3	19	2	2018-12-21	1	1	0	1	intrauterine pregnancy		2019-09-03	39	Cesarean	female	3.2
248	2018-12-17 10:40	1	35	GnRH-antagonist	19.92	secondary	Ovulatory	2	IVF	NA	5.84	3.72	25	13.02	1	1826	5.87	1.42	10.7	11	2	2018-12-22	1	1	0	1	intrauterine pregnancy		2019-08-28	38	Cesarean	male	2.9
249	2018-12-19 09:52	0	32	GnRH-antagonist	26.95	primary	Unexplained	3	IVF	10.018	4.63	3.62	25.84	8.38	2	2396	7.67	0.309	8.4	14	0	2018-12-24	1	1	0	1	intrauterine pregnancy	yes	- -
250	2018-12-20 09:10	0	40	GnRH-antagonist	20.03	secondary	male	3	ICSI	2.277	7.42	5.46	27.47	13.59	2	2209	2.45	0.79	9.9	13	2	2018-12-25	1	1	0	0			- -
251	2018-12-21 09:10	1	38	GnRH-antagonist	18.73	secondary	Tubal	7	IVF	3.3	6.53	5.24	13.25	24.18	3	3213	1.38	0.847	8.2	7	1	2018-12-26	1	1	0	0			- -
252	2018-12-21 09:30	1	34	GnRH-antagonist	20.03	primary	Tubal	6	IVF	2.366	9.4	6.7	29.68	12.55	2	2493	2.99	0.722	8.6	8	2	2018-12-26	1	1	0	1	intrauterine pregnancy		2019-08-16	35	Vaginal	male	2.75
253	2018-12-21 10:00	0	29	GnRH-antagonist	20.93	primary	male	3	ICSI	18	6.28	7.5	31.29	6.3	4	4468	3.4	0.297	9	10	2	2018-12-26	1	1	0	0			- -
254	2018-12-23 09:05	0	29	GnRH-antagonist	19.72	primary	Tubal	1	IVF	1.321	6.02	2.3	15	13.26	1	1583	3.42	0.474	8.8	6	1	2018-12-28	1	1	0	0			- -
255	2018-12-23 10:00	0	31	GnRH-antagonist	18.43	primary	Mixed	5	IVF	7.007	6.86	5.39	47.28	14.76	3	3412	2.12	0.972	11.2	15	2	2018-12-28	1	1	0	0			- -
256	2018-12-25 09:12	1	30	GnRH-antagonist	22.43	primary	Tubal	3	IVF	8.768	5.74	5.86	23.91	8.69	1	1748	16.13	0.547	12.3	7	1	2018-12-30	1	1	0	1	intrauterine pregnancy		2019-09-13	39	Vaginal	female	3.3
257	2018-12-25 10:10	0	31	GnRH-antagonist	23.15	primary	male	3	ICSI	7.65	5.21	7.17	33.18	13.76	2	2549	2.77	1	7.8	16	2	2018-12-30	1	1	0	0			- -
258	2018-12-25 10:40	0	31	GnRH-antagonist	16.85	primary	Tubal	3	IVF	15.246	6.32	7.35	35.77	7.84	1	1922	2.62	0.164	11.7	12	1	2018-12-30	1	1	0	1	intrauterine pregnancy		2019-09-23	40	Vaginal	female	3.25
259	2018-12-26 09:30	1	40	GnRH-antagonist	19.47	secondary	Unexplained	15	IVF	0.981	5.5	3.91	44.52	18.93	2	2751	5.18	0.979	10.6	9	0	2018-12-31	1	1	0	0			- -
260	2018-12-26 10:40	0	26	GnRH-antagonist	22.89	secondary	Tubal	0	IVF	7.609	6.3	6.52	27.1	9.21	4	4286	2.29	0.829	13.3	17	0	2018-12-31	1	1	0	1	intrauterine pregnancy		2019-09-10	38	Cesarean	male	3.71
261	2018-12-27 10:15	0	28	GnRH-antagonist	20.69	primary	Mixed	1	IVF	2.251	6.25	4.2	25.65	13.3	1	1188	1.47	0.668	10.8	10	2	2019-01-01	1	1	0	0			- -
262	2018-12-28 09:46	1	41	GnRH-antagonist	22.03	secondary	male	1	ICSI	1.138	6.5	3.68	79.99	12.76	1	1991	3.51	0.435	11	6	0	2019-01-02	1	1	0	1	intrauterine pregnancy	yes	- -
263	2018-12-28 09:55	1	39	GnRH-antagonist	21.48	secondary	Tubal	11	IVF	1.314	4.98	2.94	26.43	14.92	1	1503	1.64	0.161	12.7	7	1	2019-01-02	1	1	0	1	intrauterine pregnancy		2019-09-24	41	Cesarean	male	3.62
264	2018-12-29 09:06	1	45	GnRH-antagonist	19.49	secondary	Unexplained	1	IVF	0.602	7.76	5.31	73.61	13.08	1	1196	3.9	0.193	9.6	4	0	2019-01-03	1	1	0	0			- -
265	2018-12-29 09:16	0	35	GnRH-antagonist	21.48	secondary	Tubal	3	IVF	2.82	7.3	2.78	58.96	14.25	2	2240	3.71	0.631	10.8	9	1	2019-01-03	1	1	1	1	intrauterine pregnancy		2019-09-23	40	Cesarean	male	4.15
266	2018-12-29 09:26	0	38	GnRH-antagonist	28.13	secondary	Tubal	11	IVF	0.961	6.35	3.14	21.02	11.56	1	1158	7.81	0.652	10.9	6	1	2019-01-03	1	1	0	0			- -
267	2018-12-29 09:56	0	31	GnRH-antagonist	26.04	primary	male	3	ICSI	3.531	5.56	4.73	34.85	9.77	2	2405	1.15	0.356	12	9	2	2019-01-03	1	1	0	0			- -
268	2018-12-31 09:15	0	41	GnRH-antagonist	24	secondary	Mixed	2	IVF	4.64	6.78	4.29	79.86	15.43	2	2853	6.54	0.717	8.3	12	2	2019-01-05	1	1	0	0			- -
269	2019-01-01 09:25	0	29	GnRH-antagonist	20.2	primary	Tubal	3	IVF	8.547	4.74	8.56	27.43	8.48	3	3957	1.93	0.759	9.2	19	2	2019-01-06	1	1	0	1	intrauterine pregnancy		2019-09-18	39	Vaginal	female	2.95
270	2019-01-02 09:36	0	32	GnRH-antagonist	20.03	secondary	Tubal	3	IVF	5.225	5.17	8.87	39.24	8.4	2	2965	3.2	0.238	11.3	16	2	2019-01-07	1	1	0	1	intrauterine pregnancy		2019-09-23	39	Vaginal	male	3.05
271	2019-01-02 09:56	0	31	GnRH-antagonist	21.37	secondary	Tubal	3	IVF	10.045	4.78	4.74	24.98	12.39	2	2039	1.98	0.51	10.8	15	1	2019-01-07	1	1	0	0			- -
272	2019-01-04 09:40	0	28	GnRH-antagonist	22.03	secondary	Tubal	2	IVF	4.421	8.33	8.95	40.6	14.63	1	1845	2.41	0.298	9.5	10	2	2019-01-09	1	1	0	0			- -
273	2019-01-04 11:10	0	25	GnRH-antagonist	19.47	secondary	Ovulatory	5	IVF	12.015	5.9	5.14	47.7	9.97	4	4676	3.1	0.398	7.6	16	2	2019-01-09	1	1	0	1	intrauterine pregnancy		2019-10-04	41	Cesarean	female	3.98
274	2019-01-05 09:10	0	36	GnRH-antagonist	20.96	secondary	Tubal	4	IVF	1.391	5.89	1.33	35.85	20.64	1	1351	2.3	0.474	8.9	5	1	2019-01-10	1	1	0	0			- -
275	2019-01-05 09:20	0	38	GnRH-antagonist	26.57	secondary	Tubal	4	IVF	1.2	5.86	5.56	32.65	3.12	1	1694	9.68	0.353	12.3	6	1	2019-01-10	1	1	0	1	intrauterine pregnancy		2019-09-24	39	Cesarean	female	3.3
276	2019-01-06 09:15	0	32	GnRH-antagonist	21.34	primary	Unexplained	5	IVF	3.249	6	2.8	48.8	12.75	1	1583	3.06	0.197	8.7	8	1	2019-01-11	1	1	0	0			- -
277	2019-01-06 09:50	0	36	GnRH-antagonist	21.33	secondary	Unexplained	6	IVF	5.236	8.43	7.73	33.73	17.22	2	2804	1.62	1.11	8.8	8	2	2019-01-11	1	1	0	1	intrauterine pregnancy		2019-09-27	39	Cesarean	female	2.9
278	2019-01-09 09:15	0	40	GnRH-antagonist	23.07	secondary	Ovulatory	1	IVF	2.6	6.56	5.41	25.97	12.77	1	1925	2.3	0.321	9.5	11	2	2019-01-14	1	1	0	1	intrauterine pregnancy		2019-09-16	37	Cesarean	female	3.4
279	2019-01-12 10:25	0	32	GnRH-antagonist	22.6	primary	male	4	ICSI	5.197	5.63	6.55	17.82	16.13	3	3136	1.61	0.677	10.7	18	2	2019-01-17	1	1	0	0			- -
280	2019-01-13 09:05	1	31	GnRH-antagonist	19.68	primary	male	3	ICSI	2.194	8.41	5.43	44.95	19.66	3	3504	3.13	0.557	10	6	2	2019-01-18	1	1	0	0			- -
281	2019-01-13 09:40	0	33	GnRH-antagonist	22.03	primary	Tubal	2	IVF	12.085	6	6.24	34.64	11.73	3	3821	6.8	0.663	10.2	15	2	2019-01-18	1	1	0	0			- -
282	2019-01-15 10:15	0	33	GnRH-antagonist	25.89	secondary	Tubal	1	IVF	3.84	6.74	3.39	49	13.92	3	3191	1.43	0.856	8.9	17	2	2019-01-20	1	1	0	1	ectopic pregnancy		- -
283	2019-01-15 10:35	0	30	GnRH-antagonist	17.53	primary	male	2	ICSI	6.478	5.92	6.86	26.7	18.56	1	1568	4.01	0.366	9.6	20	2	2019-01-20	1	1	0	1	intrauterine pregnancy	yes	- -
284	2019-01-17 09:00	0	26	GnRH-antagonist	19.57	primary	male	8	ICSI	4.146	5.62	6.33	31.5	9.26	2	2159	5.14	0.611	9.8	16	2	2019-01-22	1	1	0	1	intrauterine pregnancy		2019-09-19	36	Vaginal	male	3.2
285	2019-01-18 09:20	0	31	GnRH-antagonist	18.73	secondary	Tubal	3	ICSI	8.52	2.35	2.26	39.28	8.63	4	4620	6.01	0.738	13	14	2	2019-01-23	1	1	0	0			- -
286	2019-01-19 09:40	0	29	GnRH-antagonist	19.56	secondary	male	4	ICSI	6.242	6.02	6.23	40.33	15.9	2	2867	2.3	0.844	11.6	20	2	2019-01-24	1	1	0	0			- -
287	2019-01-21 10:26	0	26	GnRH-antagonist	24.84	secondary	Tubal	1	IVF	3.648	5.45	4.48	25.63	11.01	1	1675	3.6	0.42	15.2	12	1	2019-01-26	1	1	0	1	intrauterine pregnancy		2019-10-23	409	Cesarean	male	2.85
288	2019-01-22 09:15	0	34	GnRH-antagonist	21.77	primary	Tubal	6	IVF	3.376	6.28	3.83	37.78	9.09	3	3179	2.68	0.397	13	17	2	2019-01-27	1	1	0	1	intrauterine pregnancy		2019-09-29	37	Cesarean	female	3.3
289	2019-01-24 09:36	1	30	GnRH-antagonist	28.04	secondary	male	3	ICSI	7.595	4.19	1.88	31.48	8.6	3	3585	10.17	0.406	10.9	19	2	2019-01-29	1	1	0	1	intrauterine pregnancy		2019-10-16	39	Cesarean	male	3.1
290	2019-01-27 08:55	0	33	GnRH-antagonist	21.63	secondary	Endometriosis	3	IVF	2.649	7.75	4.29	35.49	17.07	3	3739	2.24	0.65	9	13	1	2019-02-01	1	1	0	1	intrauterine pregnancy		2019-09-28	37	Cesarean	male	3.3
291	2019-02-20 09:30	0	31	GnRH-antagonist	20.55	primary	Ovulatory	1	IVF	3.735	4.5	5.22	18.96	10.46	3	3752	1.71	0.799	14.3	25	2	2019-02-25	1	1	0	0			- -
292	2019-02-22 08:55	0	31	GnRH-antagonist	19.53	secondary	Tubal	5	IVF	4.65	4.84	3.92	13.5	18.8	3	3495	1.02	1.05	8.7	17	2	2019-02-27	1	1	0	1	intrauterine pregnancy		2019-10-21	36	Cesarean	female	2.3	female	2.3
293	2019-02-23 08:40	2	43	GnRH-antagonist	20.83	secondary	Tubal	4	IVF	0.63	8.82	3.39	25.61	21.1	1	1205	13.75	0.382	8.2	5	0	2019-02-28	1	0	0	0			- -
294	2019-02-24 09:06	0	29	GnRH-antagonist	19.07	primary	Endometriosis	2	IVF	6	6	5.83	39.46	13.98	2	2614	2.35	0.511	8	14	2	2019-03-01	1	1	0	0			- -
295	2019-02-25 09:46	0	35	GnRH-antagonist	28.04	secondary	Tubal	3	IVF	11.316	7.72	7.57	48.69	6.74	2	2931	3.22	0.282	8.7	9	2	2019-03-02	1	1	0	0			- -
296	2019-02-26 10:00	0	28	GnRH-antagonist	21.48	primary	Tubal	4	IVF	4.917	6.42	8.76	35.13	9.97	2	2178	3.69	0.381	13.5	12	2	2019-03-03	1	1	0	1	intrauterine pregnancy		2019-11-06	37	Vaginal	male	3.23
297	2019-02-26 10:10	0	28	GnRH-antagonist	22.22	secondary	Tubal	1	IVF	4.455	5.4	4.57	41.59	13.28	2	2705	5.74	0.592	8.8	12	1	2019-03-03	1	1	0	1	intrauterine pregnancy	yes	- -
298	2019-03-01 08:40	0	33	GnRH-antagonist	20.2	secondary	Tubal	1	IVF	3.283	6.1	5.99	46.97	9.88	3	3195	5.12	0.589	12.8	13	2	2019-03-06	1	1	0	1	intrauterine pregnancy		2019-11-22	38	Vaginal	male	3.13
299	2019-03-03 09:25	0	32	GnRH-antagonist	18.99	primary	Endometriosis	5	IVF	6.39	3.07	5.76	24.5	13.36	2	2275	2.33	0.634	10.4	8	2	2019-03-08	1	1	0	0			- -
300	2019-03-03 09:46	0	28	GnRH-antagonist	24.14	secondary	Endometriosis	4	IVF	3.721	6.1	5.78	14.18	9.37	2	2034	7.02	0.365	11.6	15	0	2019-03-08	1	1	0	1	intrauterine pregnancy		2019-11-18	39	Vaginal	female	2.85
301	2019-03-06 10:05	1	38	GnRH-antagonist	18.03	secondary	Tubal	4	IVF	0.688	6.32	4.51	32.65	30.46	2	2808	2.3	1.05	8.5	6	0	2019-03-11	1	1	0	1	intrauterine pregnancy	yes	- -
302	2019-03-06 10:24	1	35	GnRH-antagonist	22.6	secondary	male	4	ICSI	6.815	13.22	6.97	33.88	17.98	3	3408	3.52	0.637	8.1	15	2	2019-03-11	1	1	0	0			- -
303	2019-03-11 09:05	1	35	GnRH-antagonist	24.02	secondary	Tubal	2	IVF	4.92	6.99	4.9	14.04	12.29	2	2615	9.96	1.12	9.4	12	2	2019-03-16	1	1	0	1	intrauterine pregnancy		2019-11-21	38	Cesarean	male	4.02
304	2019-03-13 09:10	0	28	GnRH-antagonist	20.62	primary	male	3	IVF	1.308	6.45	4.32	49.27	11.87	2	2216	8.42	0.861	8.8	10	2	2019-03-18	1	1	0	1	intrauterine pregnancy		2019-12-06	40	Cesarean	male	3.9
305	2019-03-14 09:50	1	32	GnRH-antagonist	27.36	secondary	Tubal	3	IVF	1.732	6.44	3.8	31.64	5.91	1	1404	2.2	0.439	13.4	15	2	2019-03-19	1	1	0	1	intrauterine pregnancy		2019-11-19	37	Vaginal	male	3.3
306	2019-03-15 09:35	0	27	GnRH-antagonist	20.7	primary	male	2	ICSI	10.436	6.68	7.06	23.7	9.4	2	2220	2.99	0.351	15.2	12	2	2019-03-20	1	1	0	1	intrauterine pregnancy		2019-10-20	36	Cesarean	male	2.4
307	2019-03-16 09:05	0	29	GnRH-antagonist	20.31	primary	Tubal	5	IVF	6.816	7.7	3.67	36.77	14.27	2	2757	3.02	0.853	9	15	2	2019-03-21	1	1	0	1	intrauterine pregnancy		2019-12-07	39	Cesarean	male	3.2
308	2019-03-18 09:36	0	29	GnRH-antagonist	25	secondary	Tubal	2	IVF	7.05	4.24	1.95	10.59	11.9	2	2216	1.42	0.435	12	14	2	2019-03-23	1	1	0	1	intrauterine pregnancy		2019-12-03	38	Vaginal	female	4.05
309	2019-03-19 09:05	0	34	GnRH-antagonist	20.7	secondary	Tubal	1	IVF	7.853	7	6.66	32.34	8.88	2	2066	2.84	0.177	9.4	9	2	2019-03-24	1	1	0	1	intrauterine pregnancy		2019-12-06	39	Vaginal	male	3.75
310	2019-03-21 09:45	0	38	GnRH-antagonist	18.59	secondary	Tubal	2	IVF	3.49	8.22	5.83	45.21	18.32	3	3622	2.51	1.15	10.6	8	2	2019-03-26	1	1	0	1	intrauterine pregnancy		2019-12-07	39	Vaginal	female	2.72
311	2019-03-21 09:55	0	37	GnRH-antagonist	20.32	secondary	male	2	IVF	5.789	8.18	5.92	29.99	10.08	4	4127	3.64	0.445	10.1	12	2	2019-03-26	1	1	0	0			- -
312	2019-03-22 09:10	1	32	GnRH-antagonist	20.69	secondary	Unexplained	0	IVF	3.9	7	9.71	17.7	13.61	1	1440	3.1	0.582	11.7	13	2	2019-03-27	1	1	0	0			- -
313	2019-03-23 09:05	1	25	GnRH-antagonist	21.51	secondary	Unexplained	2	IVF	7.249	8.38	7.81	43	12.39	2	2527	6.2	0.397	11.6	7	0	2019-03-28	1	1	0	1	intrauterine pregnancy		2019-12-06	38	Cesarean	male	3.1
314	2019-03-25 09:15	0	33	GnRH-antagonist	17.83	secondary	Tubal	4	IVF	1.513	6.99	4.99	37.07	17.19	1	1582	4.38	0.482	8.1	10	2	2019-03-30	1	0	0	0			- -
315	2019-03-25 09:25	0	29	GnRH-antagonist	17.9	secondary	Tubal	5	IVF	3.25	4.44	2.6	54.33	21.52	4	4312	1.02	1.44	9.9	12	2	2019-03-30	1	1	0	0			- -
316	2019-03-26 10:25	0	34	GnRH-antagonist	25.48	primary	Tubal	1	ICSI	7.801	5.75	3.1	39.73	9.08	2	2093	2.86	0.273	9.4	13	2	2019-03-31	1	1	0	0			- -
317	2019-03-27 09:50	0	27	GnRH-antagonist	23.44	primary	male	2	ICSI	3.69	10.27	6.67	54.76	13.75	3	3571	6.01	0.683	11.2	16	2	2019-04-01	1	1	0	0			- -
318	2019-03-29 08:55	0	27	GnRH-antagonist	18.36	secondary	Tubal	1	IVF	6.579	7.2	9.15	33.58	12.47	2	2781	2.96	0.947	13.8	21	2	2019-04-03	1	1	0	0			- -
319	2019-03-29 09:15	0	33	GnRH-antagonist	19.14	secondary	Tubal	1	IVF	4.308	5.5	5.62	31.3	18.2	4	4712	5.03	1.09	12.3	13	1	2019-04-03	1	1	0	1	intrauterine pregnancy		2019-12-11	38	Vaginal	female	2.9
320	2019-03-29 10:10	0	29	GnRH-antagonist	19.98	secondary	Tubal	1	IVF	3.288	7.83	8.6	26.92	11.98	2	2357	7.85	0.43	9	14	2	2019-04-03	1	1	0	1	intrauterine pregnancy		2019-12-16	39	Cesarean	male	3.4
321	2019-03-29 10:25	0	29	GnRH-antagonist	17.97	secondary	Tubal	1	IVF	5.891	6.35	9.91	38.23	20.17	3	3881	1.89	0.979	12.9	14	2	2019-04-03	1	1	0	0			- -
322	2019-03-30 08:45	0	37	GnRH-antagonist	23.12	secondary	Tubal	2	IVF	3.48	5.03	1.03	23	22.47	2	2437	2.83	1.38	12.4	17	0	2019-04-04	1	1	0	0			- -
323	2019-04-01 08:56	1	26	GnRH-antagonist	25.91	secondary	Tubal	3	ICSI	7.198	5.25	4.1	39.39	13.36	2	2612	1.41	1.03	7.2	18	2	2019-04-06	1	1	0	0			- -
324	2019-04-02 09:10	0	30	GnRH-antagonist	21.08	secondary	Tubal	3	IVF	5.682	8.65	5.31	19.23	8.91	1	1267	1.6	0.619	10.1	5	2	2019-04-07	1	1	0	1	intrauterine pregnancy		2020-01-02	40	Vaginal	female	3.25
325	2019-04-02 09:20	0	28	GnRH-antagonist	18.49	secondary	Tubal	2	IVF	5.428	7.54	4.94	21.07	12.83	2	2470	2.95	0.558	9.6	10	2	2019-04-07	1	1	0	0			- -
326	2019-04-04 09:50	0	33	GnRH-antagonist	21.64	secondary	Tubal	4	IVF	4.314	5	5.54	53.53	12.9	2	2970	3	0.879	11.4	10	2	2019-04-09	1	1	0	1	intrauterine pregnancy		2019-12-21	38	Vaginal	male	3.5
327	2019-04-04 10:40	0	26	GnRH-antagonist	NA	primary	male	2	ICSI	4.076	6.87	5.46	28.34	9.86	3	3173	2.85	0.537	9.1	15	2	2019-04-09	1	1	0	1	intrauterine pregnancy		2019-12-02	36	Cesarean	male	2.5
328	2019-04-08 09:46	0	32	GnRH-antagonist	22.83	secondary	Unexplained	3	IVF	3.321	6.76	5.59	24.05	14.92	1	1576	4.23	0.931	12.2	7	2	2019-04-13	1	1	0	1	intrauterine pregnancy		2019-12-25	39	Cesarean	male	3.5
329	2019-04-09 09:10	0	32	GnRH-antagonist	18.73	primary	Unexplained	5	IVF	0.928	4.81	3.33	70	16.99	1	1328	1.88	0.557	10.9	7	2	2019-04-14	1	1	0	1	intrauterine pregnancy		2019-12-05	36	Cesarean	female	3.25
330	2019-04-09 09:26	0	36	GnRH-antagonist	16	primary	Tubal	1	IVF	4.07	4.43	9.29	NA	13.97	3	3345	10.18	0.716	10	19	0	2019-04-14	1	1	0	1	intrauterine pregnancy	yes	- -
331	2019-04-10 10:10	1	31	GnRH-antagonist	21.36	secondary	Tubal	6	ICSI	NA	5.93	5.3	54.55	8.98	3	3287	7.77	0.567	11	9	2	2019-04-15	1	1	0	0			- -
332	2019-04-10 10:18	0	27	GnRH-antagonist	19.72	primary	Tubal	2	IVF	5.422	7.91	6.61	45.02	7.33	2	2183	3.36	0.304	11.2	8	2	2019-04-15	1	1	0	0			- -
333	2019-04-11 08:55	0	25	GnRH-antagonist	39.96	primary	Tubal	3	IVF	11.302	8.16	9.63	27.38	10.36	2	2485	2.83	0.551	13.3	11	1	2019-04-16	1	1	0	1	intrauterine pregnancy		2019-12-22	38	Cesarean	male	3.0
334	2019-04-13 08:46	1	39	GnRH-antagonist	21.33	secondary	Tubal	9	IVF	3.74	3.13	3.21	32	12.72	2	2272	3.15	1.01	14.6	11	2	2019-04-18	1	1	1	1	intrauterine pregnancy		2019-12-22	38	Cesarean	female	2.9
335	2019-04-13 09:26	0	33	GnRH-antagonist	19.81	primary	male	3	ICSI	9.004	7.57	5.84	40.57	16.8	2	2855	5.1	1	9.9	12	2	2019-04-18	1	1	0	1	intrauterine pregnancy	yes	- -
336	2019-04-14 09:56	0	32	GnRH-antagonist	22.51	secondary	Unexplained	0	IVF	4.19	6.71	5.98	28.32	9.87	1	1707	3.78	0.457	10	10	2	2019-04-19	1	1	0	0			- -
337	2019-04-14 10:16	0	27	GnRH-antagonist	18.37	primary	Tubal	3	IVF	3.386	8.28	5.59	37.84	17.99	2	2823	3.34	0.797	8.2	13	1	2019-04-19	1	1	0	0			- -
338	2019-04-17 09:35	0	32	GnRH-antagonist	26.44	secondary	Tubal	1	IVF	3.508	5.79	4.1	26.11	11.8	1	1909	2.9	0.338	12.1	16	2	2019-04-22	1	1	0	0			- -
339	2019-04-18 10:05	0	32	GnRH-antagonist	20.83	primary	Tubal	1	IVF	3.48	7.72	7.3	26.85	13.61	2	2647	7.95	0.712	12.5	11	1	2019-04-23	1	1	0	0			- -
340	2019-04-20 10:10	0	33	GnRH-antagonist	21.77	secondary	Tubal	3	IVF	2.866	5.79	8.42	49.96	16.6	3	3714	2.87	0.953	11.6	15	2	2019-04-25	1	1	0	0			- -
341	2019-04-25 09:20	0	26	GnRH-antagonist	28.2	primary	male	3	ICSI	4.534	5.61	5.35	26.06	9.6	2	2652	5.76	0.553	10.7	20	1	2019-04-30	1	1	0	0			- -
342	2019-04-25 09:55	0	29	GnRH-antagonist	19.71	secondary	Ovulatory	3	IVF	4.653	4.71	3.11	40.71	11.53	2	2467	2.47	0.67	14	9	1	2019-04-30	1	1	0	1	intrauterine pregnancy		2019-12-16	35	Vaginal	male	2.55
343	2019-04-27 09:15	0	33	GnRH-antagonist	18.26	secondary	Tubal	9	IVF	3.33	8.86	4.29	39.09	11.32	1	1068	1.44	0.141	10.7	7	2	2019-05-02	1	1	0	1	intrauterine pregnancy		2020-01-17	39	Vaginal	male	3.36
344	2019-04-27 09:35	0	39	GnRH-antagonist	23.07	secondary	Tubal	3	IVF	2.59	6.43	2.59	33.36	20.25	2	2681	3.15	0.92	11.3	14	2	2019-05-02	1	1	0	0			- -
345	2019-04-28 09:30	0	28	GnRH-antagonist	20.55	secondary	Ovulatory	4	IVF	18	6.06	8.9	49.04	5.57	2	2947	4.32	0.273	13	19	1	2019-05-03	1	0	0	0			- -
346	2019-04-28 09:45	1	27	GnRH-antagonist	18.43	primary	male	3	ICSI	4.96	5.21	4.52	29.54	10.82	2	2950	1.4	0.774	10.6	19	2	2019-05-03	1	1	0	0			- -
347	2019-04-28 10:15	0	27	GnRH-antagonist	19.95	primary	Tubal	3	IVF	2.657	5.2	6.8	16.58	10.13	2	2947	4.32	0.767	11	16	2	2019-05-03	1	1	0	0			- -
348	2019-04-28 10:30	0	31	GnRH-antagonist	20.28	primary	male	1	ICSI	6.301	5.23	3.35	20.47	8.1	1	1789	1.76	0.565	10.9	16	1	2019-05-03	1	1	0	0			- -
349	2019-04-29 08:36	0	34	GnRH-antagonist	23.24	primary	Ovulatory	2	IVF	3.243	5.34	4.25	39.23	8.37	2	2303	4.02	0.499	11.2	11	2	2019-05-04	1	1	0	0			- -
350	2019-04-30 09:30	0	39	GnRH-antagonist	21.6	secondary	Unexplained	1	IVF	0.675	16.93	6.86	16.08	22.17	1	1745	7.87	0.624	7.6	10	2	2019-05-05	1	1	0	0			- -
351	2019-05-04 09:16	0	33	GnRH-antagonist	19.49	secondary	Tubal	7	IVF	3.655	7.58	6.13	57	12.52	4	4209	4.33	0.825	9.8	8	2	2019-05-09	1	1	0	0			- -
352	2019-05-06 10:05	0	36	GnRH-antagonist	22.19	secondary	Tubal	4	IVF	0.922	7.4	7.32	15.24	21.02	1	1490	2.06	0.659	8.9	11	2	2019-05-11	1	1	0	1	intrauterine pregnancy		2020-01-15	38	Cesarean	male	2.75
353	2019-05-08 08:55	0	24	GnRH-antagonist	25.1	primary	Tubal	5	IVF	5.254	6.62	10.3	30.26	7.03	2	2452	6.68	0.283	12.5	16	2	2019-05-13	1	1	0	1	intrauterine pregnancy		2020-01-27	39	Cesarean	female	3.3
354	2019-05-08 09:23	1	41	GnRH-antagonist	20.7	secondary	Tubal	2	IVF	3.153	6.07	7.57	35.76	17.88	3	3255	2.07	0.612	14.7	11	0	2019-05-13	1	1	0	0			- -
355	2019-05-08 09:40	0	41	GnRH-antagonist	27.73	secondary	Tubal	2	IVF	5.751	5.8	4.62	15.35	8.76	3	3531	7.31	0.74	14.5	12	2	2019-05-13	1	1	0	0			- -
356	2019-05-12 09:06	0	34	GnRH-antagonist	21.76	primary	Tubal	7	IVF	4.9	7.81	2.82	37.55	13.83	2	2264	3.23	1.11	8.9	9	1	2019-05-17	1	1	0	1	intrauterine pregnancy		2020-01-18	38	Cesarean	male	3.09
357	2019-05-14 08:40	0	29	GnRH-antagonist	18.26	primary	Unexplained	4	IVF	6.788	5.78	5.52	29.76	10.03	2	2363	2.29	0.617	12	12	2	2019-05-19	1	1	0	0			- -
358	2019-05-18 09:35	0	28	GnRH-antagonist	19.82	primary	Ovulatory	4	IVF	8.855	7.37	7.96	34.38	15.18	3	3692	3.6	0.662	10.8	15	1	2019-05-23	1	1	0	0			- -
359	2019-05-19 09:40	0	28	GnRH-antagonist	19.98	secondary	Tubal	5	IVF	5.803	5.5	3.63	36.11	14	3	3541	0.709	0.504	12	19	1	2019-05-24	1	1	0	1	intrauterine pregnancy		2020-01-29	38	Cesarean	female	3.53
360	2019-05-20 09:45	0	32	GnRH-antagonist	26.04	secondary	Tubal	1	IVF	5.36	3.2	2.63	74.82	9.5	3	3140	3.9	0.41	10.5	10	1	2019-05-25	1	1	0	1	intrauterine pregnancy		2020-01-30	38	Cesarean	female	3.9
361	2019-05-21 09:50	0	33	GnRH-antagonist	30.49	secondary	male	4	ICSI	1.699	7.44	5.05	76.36	9.19	1	1159	4.16	0.284	12.4	8	1	2019-05-26	1	1	0	1	intrauterine pregnancy		2020-01-30	38	Cesarean	female	3.7
362	2019-05-21 10:20	0	37	GnRH-antagonist	19.53	secondary	Tubal	8	IVF	1.579	7.14	5.4	73.61	17.89	3	3648	4.79	0.946	10.9	11	1	2019-05-26	1	1	0	1	intrauterine pregnancy	yes	- -
363	2019-05-21 10:25	0	26	GnRH-antagonist	17.94	secondary	Tubal	1	IVF	5.035	7.49	3.59	33.23	11.2	2	2133	2.05	0.629	8.8	10	1	2019-05-26	1	1	0	0			- -
364	2019-05-24 09:50	0	33	GnRH-antagonist	20.43	primary	Tubal	1	IVF	5.38	7.72	5.66	30	15.26	2	2744	1.76	0.776	10.7	13	2	2019-05-29	1	1	0	0			- -
365	2019-05-24 09:55	0	28	GnRH-antagonist	20.94	secondary	Tubal	1	IVF	7.993	6.64	3.9	29.76	11.57	4	4157	3.02	0.966	9	14	2	2019-05-29	1	1	0	0			- -
366	2019-05-30 09:15	0	23	GnRH-antagonist	24.03	primary	male	3	ICSI	4.51	7.94	6.15	43.76	18.06	3	3416	2.28	1.02	8.5	12	1	2019-06-04	1	1	0	0			- -
367	2019-05-30 10:05	0	34	GnRH-antagonist	20.28	secondary	Ovulatory	3	IVF	4.889	6.63	6.17	22.69	9.36	3	3374	5.76	0.848	12.8	8	2	2019-06-04	1	1	0	0			- -
368	2019-06-01 09:36	0	26	GnRH-antagonist	24.61	secondary	Tubal	1	IVF	15.464	5.28	5.44	28.26	9.97	2	2994	5.78	0.583	9	12	2	2019-06-06	1	1	0	1	intrauterine pregnancy		2020-02-13	38	Vaginal	male	2.9
369	2019-06-01 09:55	0	25	GnRH-antagonist	16.65	secondary	male	4	ICSI	6.658	7.76	10.38	58.1	16.49	3	3646	4.04	0.809	8.6	9	2	2019-06-06	1	1	0	0			- -
370	2019-06-01 10:10	0	33	GnRH-antagonist	21.88	secondary	Tubal	2	IVF	4.84	4.05	3.01	24.79	9.32	3	3701	2.62	0.924	8.4	17	2	2019-06-06	1	1	0	0			- -
371	2019-06-04 09:00	0	29	GnRH-antagonist	24.22	secondary	Tubal	4	IVF	3.19	2.26	3.36	NA	11.47	2	2716	2.44	0.74	7.7	15	2	2019-06-09	1	1	0	1	intrauterine pregnancy	yes	- -
372	2019-06-04 09:15	0	32	GnRH-antagonist	15.94	secondary	Unexplained	8	IVF	5.99	7.07	8.43	25.12	11.11	4	4093	4.63	0.832	13	13	1	2019-06-09	1	1	0	0			- -
373	2019-06-11 10:25	1	33	GnRH-antagonist	25.34	secondary	Tubal	3	IVF	15.004	4.58	5	21.64	8.85	3	3971	4.6	0.653	9.7	16	2	2019-06-16	1	1	0	1	ectopic pregnancy		- -
374	2019-06-13 09:45	0	30	GnRH-antagonist	24.98	primary	Ovulatory	2	IVF	6.67	6.65	6.77	31.2	11.49	2	2486	3.45	0.569	11	23	1	2019-06-18	1	1	0	1	intrauterine pregnancy	yes	- -
375	2019-06-14 09:43	1	35	GnRH-antagonist	27.44	secondary	male	5	ICSI	4.03	5.46	7.49	50.42	8.77	2	2067	3.85	0.681	9.8	12	2	2019-06-19	1	1	0	0			- -
376	2019-06-14 10:00	1	31	GnRH-antagonist	20.83	secondary	Tubal	2	IVF	7.098	7.59	8.16	31.7	16.95	4	4366	7.97	0.601	7.9	13	2	2019-06-19	1	1	0	0			- -
377	2019-06-14 10:45	0	30	GnRH-antagonist	24.97	primary	Tubal	5	IVF	3.64	9.04	9.65	43.6	12.32	2	2866	2.53	0.917	8.5	14	1	2019-06-19	1	1	0	0			- -
378	2019-06-15 09:15	0	26	GnRH-antagonist	23.92	primary	male	3	ICSI	NA	5.29	3.5	32.77	10.76	2	2888	2.34	1.15	12.5	10	2	2019-06-20	1	1	0	1	intrauterine pregnancy		2020-03-06	39	Vaginal	female	2.55
379	2019-06-15 09:40	0	37	GnRH-antagonist	18.73	secondary	male	1	ICSI	3.148	6.29	4.63	31.46	16.17	1	1858	1.83	0.926	11.8	15	2	2019-06-20	1	1	0	1	intrauterine pregnancy		2020-03-03	39	Vaginal	male	3.35
380	2019-06-19 09:20	1	26	GnRH-antagonist	20.83	primary	Tubal	4	ICSI	4.962	8.07	4.24	26.69	16.96	1	1758	1.63	1.38	10.6	11	2	2019-06-24	1	1	0	0			- -
381	2019-06-20 09:00	0	27	GnRH-antagonist	19.53	primary	Tubal	4	IVF	3.849	5.53	4.56	50.99	6.95	2	2132	4.83	0.768	9	9	2	2019-06-25	1	1	0	1	intrauterine pregnancy	yes	- -
382	2019-06-22 09:25	0	29	GnRH-antagonist	19.47	secondary	Tubal	1	IVF	3.314	6.37	4.57	48.93	8.6	1	1891	2.57	0.531	12.7	12	2	2019-06-27	1	1	0	1	intrauterine pregnancy		2020-03-12	39	Vaginal	female	3.2
383	2019-06-27 08:50	0	33	GnRH-antagonist	25.81	primary	Tubal	9	IVF	3.755	8.37	3.9	44.88	14.46	1	1653	1.33	0.563	11.8	9	2	2019-07-02	1	1	0	0			- -
384	2019-06-28 08:55	0	33	GnRH-antagonist	20.81	secondary	Tubal	2	IVF	9.414	6.29	5.41	52.72	12.03	2	2988	2.41	0.582	10.9	16	2	2019-07-03	1	1	0	1	intrauterine pregnancy		2020-03-13	38	Vaginal	male	2.7
385	2019-07-03 09:15	0	34	GnRH-antagonist	27.54	secondary	Endometriosis	1	IVF	3.726	6.19	5.15	33.71	8.51	3	3488	4.38	0.679	6.6	9	1	2019-07-08	1	1	0	1	intrauterine pregnancy		2020-03-29	40	Vaginal	male	3.14
386	2019-07-03 10:10	0	24	GnRH-antagonist	21.36	primary	Tubal	3	IVF	4.702	6.15	5.17	45.16	11.55	2	2329	4.29	0.879	11.1	13	2	2019-07-08	1	1	0	0			- -
387	2019-07-05 09:15	0	34	GnRH-antagonist	17.19	primary	Tubal	6	IVF	1.614	5.82	4.94	21.95	18.53	1	923.2	1.34	0.475	10.7	10	2	2019-07-10	1	1	0	1	intrauterine pregnancy		2020-03-17	38	Cesarean	female	3.0
388	2019-07-10 08:50	0	34	GnRH-antagonist	23.34	secondary	Tubal	3	IVF	3.756	6.28	2.74	39.17	8.05	2	2628	1.5	0.63	8.6	8	2	2019-07-15	1	1	1	1	intrauterine pregnancy		2020-04-01	39	Cesarean	female	3.55
389	2019-07-10 09:05	0	28	GnRH-antagonist	23.11	primary	male	1	ICSI	4.9	5.1	2.55	22.43	9.52	2	2239	2.89	0.906	10.1	14	2	2019-07-15	1	1	0	1	intrauterine pregnancy		2020-03-26	38	Vaginal	female	3.35
390	2019-07-16 09:30	0	29	GnRH-antagonist	22.23	secondary	male	3	ICSI	7.825	6.64	4.85	72.86	11.28	2	2693	4.41	0.849	12.6	13	2	2019-07-21	1	1	0	1	intrauterine pregnancy		2020-03-09	38	Vaginal	female	2.32
391	2019-07-16 09:40	0	34	GnRH-antagonist	26.06	secondary	Tubal	2	IVF	4.138	5.06	2.96	31.05	13.98	3	3330	2.75	0.17	11.1	9	1	2019-07-21	1	1	0	0			- -
392	2019-07-17 09:20	0	23	GnRH-antagonist	25.03	primary	Endometriosis	3	IVF	2.044	6.27	5.62	23.44	8.01	3	3566	0.598	0.952	11	11	1	2019-07-22	1	1	0	1	intrauterine pregnancy		2020-04-09	40	Cesarean	male	3.1
393	2019-07-21 09:20	0	33	GnRH-antagonist	18.26	primary	Unexplained	4	IVF	6.061	7.65	8.98	50.51	15.07	2	2776	1.53	0.589	10.8	8	1	2019-07-26	1	1	0	0			- -
394	2019-07-24 09:10	0	36	GnRH-antagonist	23.05	secondary	Tubal	1	IVF	7.194	1.29	1.84	44.44	9.95	3	3635	1.98	0.925	8.8	15	2	2019-07-29	1	1	0	1	intrauterine pregnancy		2020-04-22	40	Vaginal	male	2.8
395	2019-07-24 10:15	0	43	GnRH-antagonist	25.3	secondary	Ovulatory	1	IVF	3.926	6.91	5.05	27.42	13.91	2	2857	9.62	0.622	9.2	10	2	2019-07-29	1	1	0	0			- -
396	2019-07-26 09:50	0	33	GnRH-antagonist	23.44	primary	Tubal	6	IVF	1.907	7.17	9.44	32.96	11.4	2	2345	4.8	0.783	10.5	10	2	2019-07-31	1	1	0	0			- -
397	2019-07-28 09:45	0	25	GnRH-antagonist	18.55	secondary	Tubal	1	IVF	5.4	8.48	10.74	63.03	14.43	2	2642	5.02	0.719	14.1	8	2	2019-08-02	1	1	0	1	intrauterine pregnancy		2020-04-18	39	Cesarean	male	3.2
398	2019-07-29 10:40	0	32	GnRH-antagonist	21.67	primary	male	7	ICSI	7.809	7.17	5.44	19.56	11.14	1	1704	2.03	0.229	11	9	1	2019-08-03	1	1	0	1	intrauterine pregnancy	yes	- -
399	2019-08-04 09:00	1	32	GnRH-antagonist	20.69	secondary	Unexplained	0	IVF	3.9	7	9.71	17.7	10.42	1	1701	5.16	0.718	11.3	11	0	2019-08-09	1	1	0	1	intrauterine pregnancy		2020-05-06	40	Vaginal	male	4.25
400	2019-08-06 09:00	0	32	GnRH-antagonist	19.31	primary	Unexplained	1	IVF	3.955	4.7	4.99	18.21	11.05	2	2833	1.73	1.41	8.5	17	2	2019-08-11	1	1	0	1	intrauterine pregnancy		2020-04-21	38	Cesarean	male	3.6
401	2019-08-06 10:20	0	35	GnRH-antagonist	23.38	secondary	Tubal	3	IVF	3.652	6.5	4.37	41.43	10.45	3	3140	7.71	0.869	10	12	1	2019-08-11	1	1	0	1	intrauterine pregnancy	yes	- -
402	2019-08-07 08:55	0	25	GnRH-antagonist	40.27	secondary	Unexplained	2	IVF	5.933	4.17	3.91	40.99	12.3	2	2902	4.1	0.908	8.7	16	1	2019-08-12	1	1	0	0			- -
403	2019-08-10 09:45	0	34	GnRH-antagonist	16.02	secondary	male	10	ICSI	4.53	5.26	8.45	28.33	11.49	3	3592	1.87	0.789	8.5	11	2	2019-08-15	1	1	0	1	intrauterine pregnancy		2020-05-01	39	Vaginal	male	3.55
404	2019-08-11 09:00	1	41	GnRH-antagonist	27.89	secondary	Mixed	2	IVF	2.72	7.49	5.49	65.6	10.48	3	3624	1.98	1.1	9.2	10	2	2019-08-16	1	1	0	1	intrauterine pregnancy		2020-04-23	38	Vaginal	female	3.15
405	2019-08-11 09:15	0	27	GnRH-antagonist	24.22	primary	Tubal	7	IVF	3.86	7.19	2.81	21.99	12.24	2	2276	4.96	0.779	12.7	11	1	2019-08-16	1	1	0	1	intrauterine pregnancy		2020-04-15	37	Vaginal	female	3.15
406	2019-08-13 09:55	0	36	GnRH-antagonist	20.44	secondary	Tubal	3	IVF	1.33	8.09	4.23	52.12	12.34	2	2793	4.04	0.952	10	18	2	2019-08-18	1	1	0	1	intrauterine pregnancy		2020-05-02	39	Cesarean	female	3.5
407	2019-08-13 10:10	0	23	GnRH-antagonist	17.51	primary	male	2	ICSI	7.47	7.78	9.95	54.4	8.37	3	3608	2.38	0.725	12.9	11	2	2019-08-18	1	1	1	1	intrauterine pregnancy		2020-04-22	37	Cesarean	female	2.8
408	2019-08-14 08:50	0	29	GnRH-antagonist	20.81	secondary	Tubal	1	IVF	0.96	12.19	2.88	7.8	19.36	1	836.9	2.6	0.715	9.2	7	0	2019-08-19	1	0	0	1	intrauterine pregnancy		2020-04-28	38	Vaginal	male	3.1
409	2019-08-14 09:16	0	32	GnRH-antagonist	17.63	secondary	Tubal	1	IVF	2.32	5.07	3.69	21	18.31	2	2089	6.88	0.863	11.3	7	1	2019-08-19	1	1	0	0			- -
410	2019-08-18 09:24	0	36	GnRH-antagonist	20.55	secondary	Tubal	3	IVF	2.237	NA	NA	45.2	17.52	2	2371	5.02	0.797	8.2	10	2	2019-08-23	1	1	0	0			- -
411	2019-08-18 10:00	0	33	GnRH-antagonist	19.49	secondary	male	4	ICSI	4.36	7.07	4.04	37.9	15.05	2	2443	1.8	0.359	11	12	2	2019-08-23	2	2	0	1	intrauterine pregnancy		2020-05-02	38	Vaginal	female	2.75
412	2019-08-18 10:18	1	29	GnRH-antagonist	21.1	secondary	male	3	ICSI	2.546	7.22	4.88	36.12	15.53	2	2107	2.96	0.878	9.2	11	2	2019-08-23	1	1	0	1	intrauterine pregnancy		2020-04-07	35	Cesarean	male	2.9
413	2019-08-18 10:30	0	29	GnRH-antagonist	21.76	primary	Mixed	3	IVF	3.524	6.47	9.51	46.33	11.24	3	3777	3.36	0.855	12	15	2	2019-08-23	1	1	1	1	intrauterine pregnancy		2020-05-04	39	Cesarean	male	3.55
414	2019-08-20 09:50	0	31	GnRH-antagonist	20	primary	male	4	ICSI	4.248	6.03	8.09	60.31	17.17	3	3904	1.69	1.45	9	18	2	2019-08-25	1	1	0	0			- -
415	2019-08-20 10:10	0	28	GnRH-antagonist	24.39	secondary	Tubal	6	IVF	5.156	5.77	8.2	32.97	9.09	3	3614	7.75	0.929	11.1	18	2	2019-08-25	1	1	0	1	intrauterine pregnancy		2020-05-21	41	Cesarean	male	4.4
416	2019-08-21 08:50	0	34	GnRH-antagonist	22.58	secondary	Tubal	1	IVF	5.587	6.71	5.34	31.44	16.18	2	2290	2.4	0.638	10.3	14	2	2019-08-26	1	1	1	1	intrauterine pregnancy	yes	- -
417	2019-08-21 09:55	0	28	GnRH-antagonist	15.62	primary	male	1	ICSI	11.753	6.74	9.5	50.94	7.78	3	3320	2.89	0.794	9.1	13	2	2019-08-26	1	1	0	0			- -
418	2019-08-22 10:20	0	26	GnRH-antagonist	20.31	primary	Tubal	3	IVF	8.28	8.44	5.8	38.93	10.76	2	2922	4.66	0.931	11.6	12	2	2019-08-27	1	1	0	1	intrauterine pregnancy		2020-04-28	37	Vaginal	male	3.05
419	2019-08-26 10:30	0	31	GnRH-antagonist	20.66	secondary	Endometriosis	3	IVF	2.041	5.25	2.74	32.69	14.85	1	1414	1.06	0.92	11.4	8	2	2019-08-31	1	1	0	0			- -
420	2019-08-30 09:15	0	29	GnRH-antagonist	19.63	secondary	Tubal	3	IVF	3.44	8.24	5.21	18	14.92	2	2549	2.22	1.42	11.4	18	2	2019-09-04	1	1	0	1	intrauterine pregnancy	yes	- -
421	2019-08-30 10:00	0	31	GnRH-antagonist	24.17	secondary	Tubal	1	IVF	2.046	4.25	2.4	30.17	11.09	1	1646	1.91	0.909	13	12	2	2019-09-04	1	1	0	1	intrauterine pregnancy		2020-04-27	36	Vaginal	female	2.85
422	2019-09-09 10:16	0	24	GnRH-antagonist	24.03	primary	male	2	ICSI	NA	7.22	5.59	33.24	10.04	2	2797	5.14	0.439	16.3	10	1	2019-09-14	1	1	0	0			- -
423	2019-09-10 08:55	1	25	GnRH-antagonist	19.71	secondary	Tubal	2	ICSI	15.211	4.02	4.4	29.38	4.59	3	3249	5.31	0.451	10.5	10	2	2019-09-15	1	1	0	0			- -
424	2019-09-12 08:50	1	35	GnRH-antagonist	23.5	secondary	Unexplained	12	IVF	3.58	5.68	4.73	77.7	14.78	1	1486	4.14	0.15	12	7	0	2019-09-17	1	1	0	0			- -
425	2019-09-14 09:15	0	36	GnRH-antagonist	21.88	secondary	Unexplained	4	IVF	4.269	6.75	5.1	36.69	11.36	2	2906	3.03	0.54	10.9	10	2	2019-09-19	1	1	0	1	intrauterine pregnancy		2020-05-24	38	Vaginal	female	3.2
426	2019-09-17 09:10	0	38	GnRH-antagonist	23.83	secondary	Tubal	9	IVF	7.761	6.13	7.51	35.48	10.3	3	3679	3.21	1.24	9.5	14	2	2019-09-22	1	1	1	1	intrauterine pregnancy		2020-06-04	39	Cesarean	male	3.68
427	2019-09-17 09:20	0	29	GnRH-antagonist	18.36	secondary	Tubal	8	IVF	1.687	5.77	3.61	58.2	19.14	3	3015	7.09	0.889	8.9	7	1	2019-09-22	1	1	0	1	intrauterine pregnancy		2020-05-24	37	Cesarean	female	3.26
428	2019-09-18 09:15	0	31	GnRH-antagonist	19.96	primary	Unexplained	2	IVF	3.61	5.44	8.4	41.39	14.16	4	4050	5.87	1.19	11.6	13	2	2019-09-23	1	1	0	1	intrauterine pregnancy		2020-06-07	39	Cesarean	male	3.99
429	2019-09-18 09:50	0	30	GnRH-antagonist	19.63	secondary	Tubal	2	IVF	3.76	6	6.4	38.4	7.72	4	4377	2.97	0.644	10.1	10	2	2019-09-23	1	1	0	0			- -
430	2019-09-19 10:15	0	38	GnRH-antagonist	21.88	primary	Endometriosis	2	IVF	4.49	5.51	2.8	22.07	11.49	3	3479	7.28	0.826	10.8	9	1	2019-09-24	1	1	0	1	intrauterine pregnancy	yes	- -
431	2019-09-23 10:15	0	29	GnRH-antagonist	20.96	secondary	Tubal	2	IVF	2.334	6.73	6.24	71.06	13.41	1	1915	1.41	0.789	7.5	9	1	2019-09-28	1	1	0	1	intrauterine pregnancy		2020-06-09	38	Cesarean	female	3.3
432	2019-09-23 10:26	0	26	GnRH-antagonist	19.57	primary	Endometriosis	2	IVF	7.355	7.57	7.04	37.29	8.6	1	1306	1.04	0.376	9	13	2	2019-09-28	1	1	0	0			- -
433	2019-09-26 08:55	0	32	GnRH-antagonist	19.23	secondary	Tubal	2	IVF	8.45	7.83	4.89	33	8.64	1	1267	2.2	0.77	10.5	9	1	2019-10-01	1	1	0	0			- -
434	2019-09-28 08:45	0	33	GnRH-antagonist	26.49	primary	male	6	ICSI	4.441	5.53	6.52	26.44	8.77	1	1357	1.28	0.257	10.8	10	2	2019-10-03	1	1	0	1	intrauterine pregnancy	yes	- -
435	2019-09-29 08:45	1	39	GnRH-antagonist	27.73	primary	Tubal	1	IVF	1.44	5.32	3.16	33	11.25	1	305	0.54	0.25	12.2	8	2	2019-10-04	1	0	0	0			- -
436	2019-09-30 10:05	0	32	GnRH-antagonist	23.5	primary	Tubal	6	IVF	8.216	5.23	2.62	29.74	9.86	2	2984	3.94	0.434	12.4	11	0	2019-10-05	1	1	0	0			- -
437	2019-10-01 10:10	0	30	GnRH-antagonist	19.78	secondary	male	10	ICSI	9.577	7.39	7.55	58.02	5.74	2	2460	0.769	0.273	14	14	1	2019-10-06	1	1	0	0			- -
438	2019-10-02 09:05	0	40	GnRH-antagonist	21.09	secondary	male	3	IVF	1.998	9.75	6.22	59.65	14.28	1	1336	3.84	0.2	9.7	6	1	2019-10-07	1	1	0	1	intrauterine pregnancy		2020-06-29	40	Vaginal	male	4.38
439	2019-10-06 09:46	0	29	GnRH-antagonist	21.64	secondary	male	0	ICSI	7.852	7.11	7.71	48.84	11.27	2	2669	2.37	0.732	10	13	1	2019-10-11	1	1	0	0			- -
440	2019-10-13 08:35	0	30	GnRH-antagonist	19.03	secondary	Tubal	2	IVF	4.557	6.12	3.79	54.76	11.41	4	4557	4.9	0.61	10.7	10	1	2019-10-18	1	1	0	1	intrauterine pregnancy		2020-07-03	39	Vaginal	male	2.90
441	2019-10-14 09:06	0	25	GnRH-antagonist	20.89	secondary	Tubal	1	IVF	2.33	6.96	1.01	60.19	13.8	2	2092	2.65	0.759	9.7	10	2	2019-10-19	1	1	0	0			- -
442	2019-10-16 09:23	0	29	GnRH-antagonist	20.96	secondary	Tubal	2	IVF	6.76	0.256	7.47	17.72	9.07	1	1564	5.88	0.847	10.5	14	2	2019-10-21	1	1	0	0			- -
443	2019-10-18 09:35	0	27	GnRH-antagonist	16.65	secondary	male	1	ICSI	3.018	7.12	8.61	34.32	12.06	3	3946	2.11	0.587	10	8	1	2019-10-23	1	1	0	0			- -
444	2019-10-20 09:25	0	30	GnRH-antagonist	17.31	secondary	Tubal	3	IVF	6.744	6.13	9.09	39.59	8.64	1	2000	1.43	0.581	9.9	12	1	2019-10-25	1	1	0	1	intrauterine pregnancy		2020-06-23	36	Vaginal	female	2.4
445	2019-10-21 09:35	0	32	GnRH-antagonist	24.91	primary	Tubal	2	IVF	5.551	5.05	3.42	29.26	8.15	2	2322	1.73	0.87	10.3	17	2	2019-10-26	1	1	0	1	intrauterine pregnancy		2020-05-23	31	Vaginal	male	2.25
446	2019-10-23 09:30	0	29	GnRH-antagonist	19.77	primary	male	2	ICSI	3.51	5.58	10.66	27.24	15.91	2	2158	7.46	1.13	11.5	7	1	2019-10-28	1	1	0	0			- -
447	2019-10-27 09:00	0	35	GnRH-antagonist	20.7	secondary	Tubal	5	IVF	2.88	4.52	1.4	24	14.37	3	3449	1.64	1.18	13.8	9	0	2019-11-01	1	1	0	1	intrauterine pregnancy	yes	- -
448	2019-10-27 09:25	0	25	GnRH-antagonist	20.82	primary	male	2	ICSI	6.758	5.56	5.62	39.71	9.49	2	2954	3.96	0.491	14.8	14	2	2019-11-01	1	1	0	1	intrauterine pregnancy		2020-07-10	40	Vaginal	female	3.75
449	2019-11-07 09:30	0	29	GnRH-antagonist	20.55	secondary	Tubal	1	IVF	9.705	5.71	4.86	42.88	13.06	2	2733	2.77	0.948	8.7	10	2	2019-11-12	1	1	0	1	intrauterine pregnancy		2020-07-30	40	Cesarean	male	3.3
450	2019-11-08 09:40	0	30	GnRH-antagonist	20.83	primary	Tubal	6	IVF	2.613	9.97	4.44	37.57	14.1	2	2465	1.55	0.983	12.7	13	2	2019-11-13	1	1	0	1	intrauterine pregnancy		2020-07-29	38	Cesarean	female	3
451	2019-11-10 09:40	0	32	GnRH-antagonist	19.81	secondary	Tubal	3	IVF	3.099	6.36	7.39	50.56	14.38	2	2548	1.78	0.659	15.7	12	2	2019-11-15	1	1	0	0			- -
452	2019-11-13 09:46	0	36	GnRH-antagonist	19.48	secondary	Tubal	2	IVF	1.1	8.15	6	41.06	22.2	2	2186	4.1	0.864	13.2	8	2	2019-11-18	1	1	0	0			- -
453	2019-11-13 10:16	0	29	GnRH-antagonist	24.03	secondary	Tubal	2	IVF	6.136	2.73	2.51	40.23	7.5	1	1546	1.74	0.761	8.6	12	1	2019-11-18	1	1	1	1	intrauterine pregnancy		2020-07-21	37	Cesarean	female	3
454	2019-11-15 09:30	0	31	GnRH-antagonist	20.81	primary	male	3	ICSI	5.876	5.36	5.71	26.6	9.77	2	2886	4.35	0.616	11.9	12	2	2019-11-20	1	1	0	0			- -
455	2019-11-18 09:40	0	20	GnRH-antagonist	19.05	primary	male	1	ICSI	5.54	8.81	5.7	31.88	14.16	1	1747	4.03	0.313	12.6	15	2	2019-11-23	1	1	0	1	intrauterine pregnancy		2020-08-06	39	Cesarean	female	3.0
456	2019-11-20 09:35	0	32	GnRH-antagonist	18.36	secondary	Tubal	8	IVF	5.017	6.45	5	67.09	9.81	2	2090	1.73	0.395	14.2	8	2	2019-11-25	1	1	0	0			- -
457	2019-11-20 09:40	0	30	GnRH-antagonist	19.23	primary	Ovulatory	4	IVF	17.039	4.09	5.47	31.91	10.32	3	3809	3.18	1.27	8.4	16	2	2019-11-25	1	1	0	0			- -
458	2019-11-21 10:45	0	36	GnRH-antagonist	20.44	primary	Ovulatory	5	IVF	4.446	1.34	1.46	55.58	13.43	1	1759	1.23	1.22	11.6	13	1	2019-11-26	1	1	0	0			- -
459	2019-11-25 09:45	0	32	GnRH-antagonist	25.39	primary	Tubal	4	IVF	3.284	8.02	4.78	44.35	12.84	2	2860	6.04	0.844	9.1	22	2	2019-11-30	1	1	0	1	intrauterine pregnancy		2020-07-30	37	Cesarean	male	2.9
460	2019-11-26 09:10	0	31	GnRH-antagonist	21.26	secondary	Tubal	2	IVF	1.98	6.85	4.89	35.63	13.14	3	3180	2.95	1.31	11.2	16	2	2019-12-01	1	1	0	0			- -
461	2019-11-27 08:50	0	29	GnRH-antagonist	21.83	secondary	Tubal	3	IVF	1.264	5.9	5.06	42.83	12.7	1	1756	4.58	0.827	9.8	12	2	2019-12-02	1	1	0	1	intrauterine pregnancy		2020-08-22	40	Vaginal	female	3.45
462	2019-11-27 09:10	0	32	GnRH-antagonist	20.34	primary	Endometriosis	8	IVF	12.437	6.69	4.62	58.85	7.75	3	3102	1.82	0.887	10.8	19	2	2019-12-02	1	1	0	1	intrauterine pregnancy		2020-08-07	38	Vaginal	female	2.71
463	2019-11-28 09:00	0	39	GnRH-antagonist	22.55	primary	Tubal	6	IVF	1.598	6.86	6.84	45.7	23.48	2	2881	4.89	0.731	11.9	14	2	2019-12-03	1	1	0	0			- -
464	2019-11-28 09:15	0	33	GnRH-antagonist	24.65	primary	Endometriosis	7	IVF	1.809	4.2	2.15	18.94	14.54	1	1757	3.65	0.75	11.6	13	2	2019-12-03	1	1	0	0			- -
465	2019-11-29 09:45	0	27	GnRH-antagonist	17.72	primary	male	2	IVF	2.218	7.85	5	48.64	17.06	1	1953	2.39	0.812	9.4	14	2	2019-12-04	1	1	0	1	intrauterine pregnancy		2020-08-11	38	Vaginal	male	2.7
466	2019-12-02 09:16	0	30	GnRH-antagonist	21.72	primary	Endometriosis	4	IVF	4.26	8.59	4.46	35.99	13.24	3	3352	2.33	0.648	12.7	12	2	2019-12-07	1	1	0	0			- -
467	2019-12-09 08:56	2	40	GnRH-antagonist	19.47	secondary	Unexplained	7	IVF	1.949	6.45	5.25	75.54	12.76	2	2268	1.42	0.485	10.1	9	2	2019-12-14	1	1	0	1	intrauterine pregnancy	yes	- -
468	2019-12-18 09:20	1	36	GnRH-antagonist	27.34	secondary	Ovulatory	1	IVF	8.81	4.5	4.48	47.51	13.43	3	3259	8.69	0.705	13.3	10	2	2019-12-23	1	1	0	1	intrauterine pregnancy		2020-08-28	39	Cesarean	male	3.5
469	2019-12-18 10:05	0	25	GnRH-antagonist	22.95	primary	Tubal	2	IVF	2.524	6.54	4.68	33.76	10.58	3	3868	5.84	0.927	10.2	14	2	2019-12-23	1	1	0	1	intrauterine pregnancy		2020-09-17	41	Cesarean	male	3.75
470	2019-12-20 09:45	0	29	GnRH-antagonist	19.76	secondary	Tubal	1	IVF	3.448	6.82	6.5	40.03	11.05	2	2758	2.57	0.783	10.6	17	2	2019-12-25	1	1	0	1	intrauterine pregnancy		2020-09-11	39	Cesarean	female	3.2
471	2019-12-21 09:56	0	30	GnRH-antagonist	21.29	secondary	Tubal	1	IVF	2.93	6.92	3.79	65.04	17.87	2	2853	1.5	0.664	11.7	9	2	2019-12-26	1	1	0	0			- -
472	2019-12-23 10:46	0	33	GnRH-antagonist	17.31	secondary	Tubal	2	IVF	1.59	6.7	7.41	28.04	23.22	2	2897	6.69	0.862	10.5	11	2	2019-12-28	1	1	0	1	intrauterine pregnancy		2020-09-17	39	Vaginal	female	2.65
473	2019-12-24 09:45	0	28	GnRH-antagonist	23.88	primary	Tubal	2	IVF	7.589	4.13	9.45	50	6.2	2	2064	1.37	0.25	9.2	16	2	2019-12-29	1	1	0	0			- -
474	2019-12-25 09:40	0	32	GnRH-antagonist	23.71	secondary	Tubal	2	IVF	2.705	3.5	5.1	72.3	11.1	2	2019	0.73	0.496	14.3	13	2	2019-12-30	1	1	0	0			- -
475	2019-12-27 08:53	0	27	GnRH-antagonist	20.4	primary	Tubal	2	IVF	1.981	4.99	5.51	30.52	15.5	3	3441	3.1	1.2	13.9	13	2	2020-01-01	1	1	0	1	intrauterine pregnancy		2020-09-15	39	Vaginal	female	2.6
476	2019-12-27 09:20	0	34	GnRH-antagonist	20.34	primary	Tubal	3	IVF	3.3	4.67	7.07	33.79	9.31	3	3302	7.32	0.806	10.7	7	1	2020-01-01	1	1	0	0			- -
477	2019-12-29 09:35	0	30	GnRH-antagonist	25.34	secondary	Tubal	1	IVF	4.276	5.67	3.99	21.02	9.13	2	2506	5.97	0.686	10.8	14	2	2020-01-03	1	1	0	1	intrauterine pregnancy		2020-09-17	39	Cesarean	male	3.91
478	2020-01-02 08:30	1	24	GnRH-antagonist	20.2	primary	Ovulatory	5	IVF	9.041	8.13	6.57	39.85	10.82	1	1938	4.73	0.376	10.6	11	2	2020-01-07	1	1	0	1	intrauterine pregnancy		2020-09-13	38	Vaginal	male	2.85
479	2020-01-03 09:10	0	28	GnRH-antagonist	NA	secondary	Tubal	2	IVF	1.873	5.56	5.84	28.15	11.05	1	1947	5.88	0.3	11	11	2	2020-01-08	1	1	0	1	intrauterine pregnancy	yes	- -
480	2020-01-07 08:55	0	34	GnRH-antagonist	30.47	secondary	Tubal	2	IVF	1.75	5.01	5.26	40.05	11.79	2	2666	3.65	1.38	9.6	12	2	2020-01-12	1	1	0	1	intrauterine pregnancy		2020-09-23	39	Cesarean	male	3.0
481	2020-03-11 09:50	0	32	GnRH-antagonist	25.4	primary	Tubal	3	IVF	0.583	7.63	3.76	30.7	14.23	1	1447	1.44	0.591	13.7	12	2	2020-03-16	1	1	0	0			- -
482	2020-03-12 09:05	0	35	GnRH-antagonist	21.93	secondary	Tubal	2	IVF	4.876	7.27	7.2	31.87	16.56	3	3138	4.46	0.983	9.5	14	2	2020-03-17	1	1	0	0			- -
483	2020-03-15 08:46	0	27	GnRH-antagonist	19.57	primary	Ovulatory	4	IVF	8.212	6.35	5.29	26.41	14.91	4	4384	3.02	1.2	9.7	18	2	2020-03-20	1	1	0	1	intrauterine pregnancy		- -	38	Vaginal	female	2.7
484	2020-03-16 09:20	1	38	GnRH-antagonist	24.24	secondary	Tubal	1	IVF	4.03	7.51	4.75	26.7	12.65	1	1679	3.29	0.401	10	12	2	2020-03-21	1	1	1	0			- -
485	2020-03-21 09:35	1	32	GnRH-antagonist	19.13	secondary	Tubal	2	IVF	3.844	5.93	2.44	NA	15.41	2	2150	5.08	0.594	7.8	8	2	2020-03-26	1	1	0	0			- -
486	2020-03-21 09:50	0	27	GnRH-antagonist	19.53	primary	Tubal	4	IVF	4.68	7.47	10.47	14.11	12.82	3	3481	17.14	0.77	8	9	1	2020-03-26	1	1	0	0			- -
487	2020-03-26 09:15	0	25	GnRH-antagonist	19.78	secondary	Tubal	2	IVF	5.337	6.38	2.39	74	13.77	4	4514	3	0.561	8.8	17	2	2020-03-31	1	1	0	1	intrauterine pregnancy		- -	39	Vaginal	male	3.05
488	2020-03-27 09:50	1	28	GnRH-antagonist	21.42	secondary	Tubal	1	IVF	3.437	5.79	4.98	40.61	9.64	3	3328	2.61	0.78	9.3	19	2	2020-04-01	1	1	0	0			- -
489	2020-04-05 09:25	0	28	GnRH-antagonist	23.71	secondary	Tubal	2	IVF	6.94	6.84	7.18	55	14.03	4	4058	3.9	0.73	9.4	13	2	2020-04-10	1	1	0	1	intrauterine pregnancy		- -	39	Cesarean	male	3.8
490	2020-04-09 08:45	1	35	GnRH-antagonist	19.98	secondary	Tubal	5	IVF	2.604	8.49	6.41	49.95	14.6	3	3778	2.04	0.782	12.2	16	4	2020-04-14	1	1	0	0			- -
491	2020-04-12 10:15	0	24	GnRH-antagonist	17.87	primary	Endometriosis	4	ICSI	5.937	6.24	7.49	53.36	15.7	3	3418	2.11	0.755	12.8	12	2	2020-04-17	1	1	0	0			- -
492	2020-04-16 09:20	0	32	GnRH-antagonist	19.57	primary	Unexplained	3	IVF	3.8	6.19	7.93	39.84	15.79	2	2599	5.03	0.864	9.1	12	4	2020-04-21	1	1	0	0			- -
493	2020-04-21 09:15	0	25	GnRH-antagonist	22.15	secondary	male	2	ICSI	4.853	5.91	6.12	39.71	7.31	3	3202	2.3	0.917	9.1	12	2	2020-04-26	1	1	0	1	intrauterine pregnancy		- -	39	Cesarean	male	2.65
494	2020-04-23 09:30	0	33	GnRH-antagonist	19.56	primary	Tubal	4	IVF	4.89	5.12	1.7	18.42	13.18	2	2855	1.53	0.943	12.8	16	2	2020-04-28	1	1	0	0			- -
495	2020-04-30 09:20	0	29	GnRH-antagonist	20	primary	Tubal	3	IVF	6.63	4.36	4.7	26.38	7.38	3	3210	1.69	0.294	13.8	16	2	2020-05-05	1	1	0	1	intrauterine pregnancy		- -	38	Cesarean	male	2.5
496	2021-08-04 09:40:25	1	31	GnRH-antagonist	21.56	secondary	Unexplained	3	IVF	4.67	6.54	4.14	33	10.36	2	2154.46	1.03	0.74	9.4	12	7	2021-08-09 10:50:09	1	1	0	0
497	2021-08-06 08:55:52	0	29	GnRH-antagonist	26.56	primary	male	1	IVF	3.44	9.71	2.81	29.4	15.27	2	2178.47	1.76	0.87	10.3	23	13	2021-08-11 11:10:45	1	1	0	0
498	2021-08-13 08:55:06	2	42	GnRH-antagonist	23.31	secondary	Tubal	6	ICSI	NA	7.83	2.81	38.64	18.6	1	1164	3.9	0.53	7.1	7	3	2021-08-18 10:50:08	1	1	0	0
499	2021-08-13 09:25:58	0	32	GnRH-antagonist	20.2	secondary	Tubal	1	IVF	1.96	6.48	2.94	25.17	11.42	1	1160	2.89	0.64	10.6	8	7	2021-08-18 10:25:53	1	1	0	1	intrauterine pregnancy		2022-04-18	37	Cesarean	male	2.5
500	2021-08-23 08:55:49	0	32	GnRH-antagonist	23.63	primary	Unexplained	1	IVF	4.13	6.65	2.49	31	13.32	1	1758.5	1.59	0.52	11.8	12	6	2021-08-28 11:10:59	1	1	0	0
501	2021-08-27 09:20:07	1	31	GnRH-antagonist	22.21	secondary	Tubal	2	IVF	1.783	7.13	6.54	30.91	14.66	1	1930.3	1.88	1.02	8.8	9	8	2021-09-01 11:23:36	1	1	0	1	intrauterine pregnancy		2022-05-12	38	Cesarean	female	3.1
502	2021-08-29 08:50:12	0	25	GnRH-antagonist	22.97	primary	male	4	ICSI	7.09	4.84	3.21	26.85	12.56	3	3584.31	1.47	0.24	11.7	12	8	2021-09-03 10:45:47	1	1	0	0
503	2021-08-31 09:13:40	0	32	GnRH-antagonist	25.2	primary	Mixed	4	IVF	5.84	6.36	8.36	29.71	13	2	2775.03	1.89	0.46	8.8	22	3	2021-09-05 10:25:17	1	1	0	0
504	2021-09-01 08:50:03	1	36	GnRH-antagonist	21.51	secondary	Tubal	1	IVF	1.73	8.03	3.08	23.25	21.1	1	846.87	1.78	0.92	11.7	10	6	2021-09-06 11:40:17	1	1	0	0
505	2021-09-04 08:50:58	0	32	GnRH-antagonist	24.8	secondary	male	13	IVF	1.9	5.22	2.1	32.32	10.9	1	1065.78	3.13	0.62	11	13	4	2021-09-09 10:53:36	1	1	0	0
506	2021-09-05 09:40:25	1	31	GnRH-antagonist	23.5	primary	Mixed	11	ICSI	5.07	6.14	2.9	24.47	14.75	2	2820.09	2.2	0.18	13.2	17	3	2021-09-10 11:00:11	1	1	0	1	intrauterine pregnancy		2022-05-30	40	Cesarean	male	3
507	2021-09-08 09:06:32	0	39	GnRH-antagonist	23.12	primary	Tubal	1	IVF	0.75	8.48	2.78	22.59	11.41	1	1118.4	2.53	0.25	9.4	8	4	2021-09-13 11:15:34	1	1	0	1	intrauterine pregnancy	yes
508	2021-09-09 08:40:02	0	26	GnRH-antagonist	21.99	secondary	Tubal	2	IVF	3.11	6.99	3.08	25.32	16.03	2	2216.17	2.2	0.48	9.9	13	6	2021-09-14 11:50:25	1	1	0	0
509	2021-09-09 09:00:02	1	33	GnRH-antagonist	23.44	secondary	Tubal	3	IVF	4.02	7.04	4.28	33.83	12.22	3	3162.49	1.92	0.57	11.3	9	7	2021-09-14 10:30:35	2	1	0	0
510	2021-09-24 09:05:35	0	31	GnRH-antagonist	21.76	secondary	Tubal	1	IVF	3.82	4.55	2.82	57.44	15.24	2	2860	1.92	0.89	8.2	13	7	2021-09-29 10:30:06	1	1	0	0
511	2021-09-29 09:00:00	0	30	GnRH-antagonist	23.12	primary	Unexplained	4	IVF	4.18	6.66	3.66	36.57	12.73	2	2184.92	2.14	0.34	11.3	10	7	2021-10-04 12:35:31	1	1	0	0
512	2021-09-30 09:25:25	0	30	GnRH-antagonist	25.53	primary	Tubal	4	IVF	5.9	7.1	6.13	21.43	10.74	1	1303.84	4.96	0.51	11	7	4	2021-10-05 10:50:45	1	1	0	1	intrauterine pregnancy			39	Cesarean	male	3.14
513	2021-09-30 09:45:44	0	25	GnRH-antagonist	18.37	secondary	Mixed	1	IVF	3.13	6.93	8.6	32.32	15.75	4	4312.81	3.28	0.5	10.7	13	7	2021-10-05 11:00:29	1	1	0	1	intrauterine pregnancy			38	Vaginal	female	2.05
514	2015-12-14 09:20	2	39	GnRH-agonist long protocol	19.15	primary	male	4	IVF	NA	5.44	0.95	69	10.07	1	1611	0.66	0.873	8.3	6	0	2015-12-19	2	0	0	0			- -
515	2015-12-30 09:35	1	36	GnRH-agonist long protocol	20.55	primary	male	10	IVF	NA	8.17	2.22	25.36	14.24	1	1919	2.28	0.822	9.3	6	0	2016-01-04	1	1	0	1	intrauterine pregnancy		2016-09-24	39	Vaginal	male	3.2
516	2015-12-30 10:00	0	36	GnRH-agonist long protocol	22.5	primary	Mixed	2	IVF	NA	5.38	6.77	29.94	11.2	4	4272	1.12	0.799	14	24	0	2016-01-04	2	2	0	1	intrauterine pregnancy		2016-08-28	36	Cesarean	female	1.9	female	2.33
517	2016-01-07 09:10	0	28	GnRH-agonist long protocol	19.95	secondary	Tubal	1	IVF	NA	3.09	1.29	47.43	9.79	2	2666	3.03	0.775	11.4	9	0	2016-01-12	2	2	0	1	intrauterine pregnancy		2016-09-10	37	Cesarean	male	2.6	female	2.7
518	2016-01-20 09:30	0	38	GnRH-agonist long protocol	18.75	secondary	Tubal	9	IVF	NA	7.61	4.03	35.87	20.63	4	4127	2.34	0.974	12	15	0	2016-01-25	1	1	0	0			- -
519	2016-01-20 09:49	2	34	GnRH-agonist long protocol	20.81	secondary	Tubal	2	IVF	NA	4.93	3.6	27.1	10.08	4	4305	0.948	1.23	8	13	0	2016-01-25	2	2	0	1	intrauterine pregnancy		2016-09-20	36	Cesarean	male	2.3	female	2.6
520	2016-03-24 09:00	0	30	GnRH-agonist long protocol	18.03	secondary	male	2	IVF	NA	7.8	5.07	22.39	21.26	4	4203	2.34	0.57	12.3	12	0	2016-03-29	2	1	0	0			- -
521	2016-03-27 09:20	0	36	GnRH-agonist long protocol	19.84	secondary	male	1	IVF	NA	4.55	2.28	12	13.77	4	4360	1.15	1.19	11.5	24	0	2016-04-01	1	1	0	0
522	2016-05-11 10:10	0	30	GnRH-agonist long protocol	19.14	secondary	Tubal	1	IVF	NA	7.58	2.74	30.02	17.7	3	3326	1.54	0.941	10.8	22	0	2016-05-16	1	1	0	0			- -
523	2016-05-12 09:52	0	27	GnRH-agonist long protocol	18.83	secondary	Tubal	1	IVF	NA	7.9	3.66	68	18.21	4	4744	1.5	1.25	9.1	20	0	2016-05-17	1	1	0	0			- -
524	2016-05-19 09:00	1	36	GnRH-agonist long protocol	26.44	secondary	Tubal	3	IVF	NA	6.29	4.46	68.45	8.53	3	3938	2.52	0.749	12	11	2	2016-05-24	2	2	0	1	intrauterine pregnancy		2017-01-20	39	Vaginal			female	2.4
525	2016-06-01 09:20	0	32	GnRH-agonist long protocol	21.83	primary	Endometriosis	3	IVF	NA	6.31	4.33	22	12.62	3	3374	0.631	0.722	15.9	15	0	2016-06-06	1	1	0	0			- -
526	2016-06-11 08:50	0	34	GnRH-agonist long protocol	21.83	secondary	Ovulatory	2	IVF	NA	8.76	2.03	32.13	15.56	1	552.1	0.42	0.439	8.7	4	0	2016-06-16	1	1	0	0			- -
527	2016-07-19 09:40	0	24	GnRH-agonist long protocol	25.68	primary	Tubal	1	IVF	NA	7.22	6.13	42.85	9.84	4	4616	4.42	0.77	16.4	21	0	2016-07-24	1	1	0	0			- -
528	2016-07-21 09:20	0	38	GnRH-agonist long protocol	22.31	secondary	Unexplained	1	IVF	NA	6.69	2.49	15.76	9.323	2	2897	0.449	0.719	14	19	0	2016-07-26	2	1	0	1	intrauterine pregnancy		2017-04-07	39	Vaginal			female	2.95
529	2016-08-12 09:15	1	38	GnRH-agonist long protocol	24.97	secondary	Tubal	1	IVF	NA	4.42	7.09	34.88	12.64	3	3930	2.55	0.494	18	12	0	2016-08-17	1	1	0	1	intrauterine pregnancy		2017-04-28	38	Cesarean			female	3.25
530	2016-08-15 09:40	0	37	GnRH-agonist long protocol	20.17	secondary	male	1	ICSI	NA	6.2	4.63	36.13	10.48	1	1619	2.57	0.992	15.6	12	2	2016-08-20	1	1	0	0			- -
531	2016-08-18 09:30	0	34	GnRH-agonist long protocol	22.06	secondary	Tubal	5	IVF	NA	6.78	5.9	17.6	14.68	2	2228	1.64	0.678	11.8	11	2	2016-08-23	2	2	0	0			- -
532	2016-08-24 10:20	1	38	GnRH-agonist long protocol	20.58	secondary	Tubal	7	IVF	NA	8.37	5.75	8.05	12.8	4	4628	2.45	0.844	12	24	4	2016-08-29	2	1	0	0			- -
533	2016-09-12 10:05	0	35	GnRH-agonist long protocol	21.26	primary	Endometriosis	8	IVF	NA	7.6	6.11	41.5	14.5	3	3446	1.1	0.34	17.8	15	2	2016-09-17	1	1	0	0			- -
534	2016-09-19 09:30	0	26	GnRH-agonist long protocol	17.97	secondary	Tubal	4	IVF	NA	7.28	6.35	71.59	12.38	3	3686	3.45	0.839	11.8	22	2	2016-09-24	2	1	0	1	intrauterine pregnancy		2017-05-31	38	Vaginal			female	2.9
535	2016-10-06 10:20	1	32	GnRH-agonist long protocol	19.31	secondary	Tubal	3	IVF	NA	5.26	3.78	47.25	10.43	2	2595	0.886	0.798	10.5	14	4	2016-10-11	2	1	0	1	intrauterine pregnancy		2017-07-02	40	Vaginal	male	2.7
536	2016-11-28 10:30	0	33	GnRH-agonist long protocol	20.32	secondary	Tubal	1	IVF	NA	5.6	2.52	13	9.58	4	4698	2.15	1.04	10.3	19	4	2016-12-03	1	1	0	0			- -
537	2016-12-03 09:45	1	32	GnRH-agonist long protocol	24.84	secondary	Tubal	4	IVF	NA	6.89	2.25	23	9.61	1	1619	0.54	0.955	9	11	2	2016-12-08	1	1	0	1	intrauterine pregnancy		2017-08-22	39	Cesarean	male	3.05
538	2016-12-14 09:32	0	31	GnRH-agonist long protocol	17.58	primary	Mixed	4	IVF	NA	3.79	3.19	41.57	17.43	2	2929	0.888	1.08	8	13	2	2016-12-19	2	1	0	0			- -
539	2016-12-15 10:35	0	44	GnRH-agonist long protocol	25.34	secondary	Tubal	0	IVF	NA	6.09	3.78	31.53	9.51	1	1998	0.608	0.561	NA	11	4	2016-12-20	1	1	0	1	intrauterine pregnancy		2017-08-27	37	Vaginal	male	2.85
540	2016-12-22 09:40	0	38	GnRH-agonist long protocol	28.44	secondary	Tubal	1	IVF	NA	5.23	4.15	26.38	12.33	4	4644	4.27	1.37	9.2	13	2	2016-12-27	2	2	0	0			- -
541	2016-12-23 09:30	1	40	GnRH-agonist long protocol	25.59	secondary	male	7	IVF	NA	7.95	5.49	28.34	10.58	3	3724	2.05	0.904	NA	18	2	2016-12-28	2	1	0	1	intrauterine pregnancy		2017-08-29	37	Cesarean	male	2.8	female	3.05
542	2016-12-24 10:30	1	26	GnRH-agonist long protocol	18.75	primary	male	2	ICSI	NA	8.31	4.64	58.35	25.67	2	2872	1.27	1.15	9.6	18	4	2016-12-29	2	0	0	0			- -
543	2017-01-09 09:05	0	25	GnRH-agonist long protocol	22.58	secondary	Mixed	2	IVF	NA	7.76	6.99	24.65	11.73	1	1841	1.65	1.07	12	13	0	2017-01-14	1	1	0	0			- -
544	2017-01-12 09:23	0	29	GnRH-agonist long protocol	23.88	primary	Mixed	3	IVF	NA	7.9	4.04	19.74	13.45	3	3782	1.98	0.856	10.6	23	2	2017-01-17	1	1	0	1	intrauterine pregnancy	yes	- -
545	2017-03-09 09:20	0	33	GnRH-agonist long protocol	NA	primary	male	1	ICSI	NA	2.81	1.31	8.33	12.46	2	2510	1.12	0.938	10.8	14	4	2017-03-14	2	2	0	1	intrauterine pregnancy		2017-11-30	40	Cesarean			female	3.85
546	2017-03-22 10:05	0	39	GnRH-agonist long protocol	27.06	secondary	Mixed	10	ICSI	NA	7.52	3.26	27.68	13.06	4	4202	1.47	1.04	16	16	2	2017-03-27	2	2	0	0			- -
547	2017-03-23 09:25	0	29	GnRH-agonist long protocol	18.82	secondary	male	1	IVF	NA	5.93	7.42	27.48	9.77	4	4166	1.99	0.83	11.5	16	2	2017-03-28	2	2	0	1	intrauterine pregnancy		2017-12-15	40	Vaginal	male	3.7
548	2017-04-01 10:20	0	39	GnRH-agonist long protocol	19.22	secondary	Tubal	7	IVF	NA	6.82	6.05	49.41	16.44	2	2061	2.02	0.992	10.1	9	0	2017-04-06	2	1	0	0			- -
549	2017-04-01 10:10	0	37	GnRH-agonist long protocol	23.19	secondary	Tubal	1	IVF	NA	3.21	3.87	17.55	13.71	1	688.2	0.634	0.443	12.4	5	0	2017-04-06	1	1	0	1	intrauterine pregnancy		2017-12-11	38	Cesarean			female	2.75
550	2017-04-05 08:55	0	42	GnRH-agonist long protocol	27.18	secondary	Tubal	2	IVF	NA	6.65	3.42	6.52	17.15	3	3076	1.14	0.756	11	12	0	2017-04-10	2	1	0	0			- -
551	2017-04-18 09:50	0	29	GnRH-agonist long protocol	20.32	primary	Tubal	3	IVF	NA	9.36	4.26	42.72	15.74	3	3573	2.39	0.738	8.7	13	2	2017-04-23	1	1	0	1	intrauterine pregnancy		2018-01-16	40	Vaginal			female	2.85
552	2017-04-22 10:05	0	29	GnRH-agonist long protocol	29.3	secondary	Tubal	10	IVF	NA	8.46	4.83	17.88	10.39	2	2577	2.44	0.724	13	15	2	2017-04-27	2	2	0	1	intrauterine pregnancy		2018-01-02	37	Vaginal	male	3.25
553	2017-04-22 09:50	0	34	GnRH-agonist long protocol	17.85	secondary	male	1	IVF	NA	7.69	7.16	25.7	23.1	2	2490	1.42	0.879	11	15	2	2017-04-27	1	1	0	1	intrauterine pregnancy	yes	- -
554	2017-04-22 09:15	0	31	GnRH-agonist long protocol	19.53	primary	Mixed	3	ICSI	NA	2.69	2.69	5	18.3	2	2699	3.11	1.11	13.3	22	2	2017-04-27	1	1	0	1	intrauterine pregnancy		2018-01-03	38	Cesarean			female	2.8
555	2017-05-04 10:10	0	39	GnRH-agonist long protocol	23.44	secondary	Tubal	3	IVF	NA	4.89	7.02	22	11.49	3	3900	1.99	0.871	8.9	13	0	2017-05-09	1	1	0	1	intrauterine pregnancy		2018-01-08	38	Cesarean	male	3.2
556	2017-05-05 08:45	0	24	GnRH-agonist long protocol	20.2	primary	Mixed	2	ICSI	NA	9.08	5.32	30.29	12.4	3	3820	1.87	1.22	11.6	18	4	2017-05-10	1	1	0	1	intrauterine pregnancy		2018-01-29	40	Vaginal	male	3.5
557	2017-05-08 09:00	0	29	GnRH-agonist long protocol	15.61	secondary	Tubal	1	IVF	NA	5.35	5.4	29	12.59	3	3702	2.18	0.684	9.5	17	2	2017-05-13	1	1	1	1	intrauterine pregnancy		2018-01-22	37	Cesarean	male	2.8
558	2017-05-13 09:45	0	28	GnRH-agonist long protocol	20.49	primary	Tubal	9	IVF	NA	6.44	3.16	20.19	11.82	3	3178	1.28	1.16	8.2	14	2	2017-05-18	1	1	0	0			- -
559	2017-05-14 09:55	0	31	GnRH-agonist long protocol	23.31	secondary	Tubal	5	IVF	NA	7.49	1.63	16.08	14.14	1	1986	0.491	0.597	10.6	17	2	2017-05-19	2	2	0	1	intrauterine pregnancy		2017-12-26	34	Cesarean	male	1.9	female	1.6
560	2017-05-17 09:15	0	38	GnRH-agonist long protocol	21.76	primary	male	3	ICSI	NA	3.84	6.69	32.25	16.99	2	2909	1.35	0.849	16.5	14	4	2017-05-22	1	1	0	0			- -
561	2017-05-19 09:45	0	28	GnRH-agonist long protocol	23.44	primary	Unexplained	1	IVF	NA	4.6	3.84	49.04	12.63	3	3762	2.81	0.737	12.7	20	4	2017-05-24	2	2	0	1	intrauterine pregnancy	yes	- -
562	2017-05-20 09:00	0	30	GnRH-agonist long protocol	19.78	primary	Mixed	3	IVF	NA	6.06	1.35	15.09	16.33	1	917.9	0.641	0.581	11.6	6	2	2017-05-25	1	0	0	0			- -
563	2017-05-31 09:40	1	30	GnRH-agonist long protocol	25.3	primary	Mixed	6	ICSI	NA	7.23	4.89	21.83	11.97	3	3346	2.57	1.19	11.1	18	0	2017-06-05	1	0	1	0			- -
564	2017-06-02 09:30	1	28	GnRH-agonist long protocol	20.94	primary	Mixed	3	IVF	NA	4.78	4.04	41.39	7.63	3	3628	1.69	0.493	9	13	2	2017-06-07	2	1	0	1	intrauterine pregnancy		2018-01-27	36	Cesarean	male	3.1
565	2017-06-04 08:50	0	33	GnRH-agonist long protocol	21.78	secondary	Tubal	1	IVF	NA	6.59	7.03	67.86	23.28	3	3794	2.68	1.22	11.4	11	2	2017-06-09	2	2	0	1	intrauterine pregnancy		2018-02-15	38	Cesarean	male	3.3
566	2017-06-14 08:40	0	27	GnRH-agonist long protocol	23.88	secondary	Tubal	1	IVF	NA	6.98	6.22	16.82	15.93	2	2020	1.75	0.88	10.1	18	0	2017-06-19	2	2	0	0			- -
567	2017-06-16 09:50	0	33	GnRH-agonist long protocol	NA	secondary	male	5	ICSI	NA	4.26	1.19	67.23	14.33	3	3023	1.78	1.12	14.3	17	2	2017-06-21	1	1	0	0			- -
568	2017-06-20 09:25	1	44	GnRH-agonist long protocol	22.6	secondary	male	1	IVF	NA	2.89	2.27	5	26.42	2	2260	1.62	1.05	13.7	16	0	2017-06-25	1	0	0	0			- -
569	2017-06-21 10:30	0	42	GnRH-agonist long protocol	25.07	secondary	male	1	ICSI	NA	8.21	2.6	55	15.18	1	1343	1.15	0.471	10	7	0	2017-06-26	1	1	0	0			- -
570	2017-06-22 08:40	0	25	GnRH-agonist long protocol	17.22	secondary	Mixed	0	IVF	NA	7.49	5.7	51.01	19.71	3	3116	1.77	1.25	7.6	13	0	2017-06-27	1	1	0	0			- -
571	2017-07-01 09:35	0	30	GnRH-agonist long protocol	21.64	secondary	Mixed	2	IVF	NA	8.71	3.84	27.15	17.81	1	1910	0.991	0.901	9.1	9	0	2017-07-06	2	1	0	0			- -
572	2017-07-01 09:50	0	30	GnRH-agonist long protocol	24.46	secondary	Mixed	2	IVF	NA	6.02	4.87	23.83	11.5	2	2630	1.19	0.915	12.1	10	0	2017-07-06	2	1	0	1	intrauterine pregnancy		2018-02-21	34	Cesarean	male	2.6	male	2.7
573	2017-07-04 08:45	0	29	GnRH-agonist long protocol	18.69	secondary	Tubal	1	IVF	NA	6.88	4.88	30.58	17.94	2	2783	1.28	1.16	11.2	18	2	2017-07-09	2	2	0	1	intrauterine pregnancy		2018-03-03	37	Cesarean	male	2.6
574	2017-07-11 09:25	0	37	GnRH-agonist long protocol	23.73	secondary	Tubal	2	IVF	NA	6.42	3.71	60.56	14.92	2	2096	1.61	0.87	8.1	11	0	2017-07-16	1	1	0	1	intrauterine pregnancy	yes	- -
575	2017-07-12 09:15	0	27	GnRH-agonist long protocol	24.03	secondary	Tubal	6	IVF	NA	3.28	3.8	24.21	16.97	1	944.4	1.71	0.903	10.2	3	0	2017-07-17	1	1	0	1	intrauterine pregnancy		2018-04-02	40	Cesarean	male	3.9
576	2017-07-12 10:30	1	34	GnRH-agonist long protocol	22.86	secondary	Tubal	2	IVF	NA	8.86	6.75	49.38	14.85	3	3012	3.89	0.83	11.6	9	0	2017-07-17	2	2	0	1	intrauterine pregnancy		2018-04-05	40	Vaginal	male	3.75
577	2017-07-14 08:05	1	42	GnRH-agonist long protocol	23.44	secondary	Mixed	1	IVF	NA	4.8	5.06	27.89	21.46	1	1059	1.96	0.876	10	7	2	2017-07-19	2	1	0	1	intrauterine pregnancy	yes	- -
578	2017-07-14 09:25	1	35	GnRH-agonist long protocol	23.78	secondary	Tubal	11	IVF	NA	5.049	2.779	24.709	17.21	3	3150	1.75	0.94	10.9	18	2	2017-07-19	2	1	0	1	intrauterine pregnancy		2018-03-29	39	Cesarean			female	3.6
579	2017-07-20 10:18	0	29	GnRH-agonist long protocol	20.96	primary	Tubal	2	IVF	NA	4.86	8.71	33.82	21.26	2	2440	2.63	0.638	10.1	10	0	2017-07-25	1	1	0	0			- -
580	2017-07-27 09:36	0	27	GnRH-agonist long protocol	18.26	secondary	Tubal	1	IVF	NA	5.72	3.09	42.1	10.83	3	3380	2.1	0.631	NA	16	0	2017-08-01	1	1	0	0			- -
581	2017-07-27 09:22	0	34	GnRH-agonist long protocol	23.05	secondary	Endometriosis	2	IVF	NA	6.73	5.12	27.05	12.33	1	1632	2.45	0.318	7.8	9	0	2017-08-01	1	1	0	0			- -
582	2017-08-02 09:00	0	25	GnRH-agonist long protocol	21.48	primary	male	5	ICSI	NA	8.21	4.43	21.29	8.99	4	4282	2.22	0.401	13.5	16	2	2017-08-07	1	2	0	1	intrauterine pregnancy		2018-04-10	37	Cesarean	male	2.7	male	3
583	2017-08-02 09:50	0	36	GnRH-agonist long protocol	21.34	secondary	Tubal	2	IVF	NA	7.86	8.91	50.42	15.22	3	3986	2.92	0.415	11.9	15	0	2017-08-07	2	2	1	1	intrauterine pregnancy		2018-04-11	38	Cesarean	male	2.85
584	2017-08-04 08:25	0	32	GnRH-agonist long protocol	23.44	primary	male	5	ICSI	NA	2.06	8.02	66.36	14.17	1	1795	2.47	1.37	11.5	9	2	2017-08-09	1	1	0	0			- -
585	2017-08-04 09:15	1	34	GnRH-agonist long protocol	21.37	primary	Mixed	5	ICSI	NA	8.21	4.3	28.8	16.86	3	3608	1.91	0.54	12.8	24	2	2017-08-09	1	1	0	0			- -
586	2017-08-08 09:35	0	28	GnRH-agonist long protocol	16.94	secondary	Tubal	0	IVF	NA	6.61	7.78	39.85	12.59	4	4274	3.25	0.571	9.8	18	2	2017-08-13	1	1	0	0			- -
587	2017-08-19 09:00	0	30	GnRH-agonist long protocol	22.6	primary	Tubal	1	IVF	NA	8.38	4.04	38.01	13.5	2	2395	3.31	0.506	13	13	2	2017-08-24	2	2	0	1	intrauterine pregnancy		2018-05-09	39	Cesarean			female	3.25
588	2017-08-21 08:50	1	41	GnRH-agonist long protocol	22.04	secondary	Tubal	1	IVF	NA	8.96	3.7	30.68	12.25	2	2234	2.6	0.434	10	13	2	2017-08-26	1	0	0	0			- -
589	2017-08-30 08:40	0	24	GnRH-agonist long protocol	18.9	primary	Tubal	2	IVF	NA	8.93	8.58	30.87	21.27	1	1537	3.19	0.26	12.9	11	2	2017-09-04	1	1	0	0			- -
590	2017-08-30 09:50	0	29	GnRH-agonist long protocol	22.66	secondary	Tubal	1	IVF	NA	5.86	2.09	38.05	11.47	3	3008	2.36	1.03	9.2	9	0	2017-09-04	1	1	0	1	intrauterine pregnancy		2018-05-25	40	Vaginal			female	3.1
591	2017-09-07 10:15	1	30	GnRH-agonist long protocol	20	primary	Tubal	6	IVF	NA	5.57	6.92	59.75	15.29	4	4660	1.3	0.66	11.1	16	0	2017-09-12	1	1	0	0
592	2017-09-10 09:25	0	26	GnRH-agonist long protocol	23.01	secondary	Tubal	1	IVF	NA	3.56	1.76	5	10.36	3	3972	1.77	0.551	7.4	22	0	2017-09-15	1	1	0	1	intrauterine pregnancy		2018-06-05	40	Cesarean	male	2.6
593	2017-09-21 09:40	0	31	GnRH-agonist long protocol	21.36	primary	male	2	ICSI	NA	7.79	5.21	18.43	18.02	3	3172	1.77	0.532	12.1	12	0	2017-09-26	1	1	0	0			- -
594	2017-09-23 09:10	0	25	GnRH-agonist long protocol	20.83	primary	Tubal	3	IVF	NA	7.48	6.67	24.6	17.68	2	2049	4.49	0.207	10.8	14	0	2017-09-28	2	2	0	0			- -
595	2017-09-28 09:50	0	29	GnRH-agonist long protocol	24.84	secondary	Tubal	1	IVF	NA	6.85	3.51	NA	12.92	1	1901	1.52	0.252	10.5	14	0	2017-10-03	2	2	0	0			- -
596	2017-09-30 08:50	0	30	GnRH-agonist long protocol	18.25	primary	male	0	ICSI	NA	8.07	5.16	16.25	14.38	2	2997	1.96	1.17	19	14	0	2017-10-05	2	2	0	1	intrauterine pregnancy		2018-06-23	39	Cesarean	male	2.65
597	2017-09-30 09:00	1	36	GnRH-agonist long protocol	25	secondary	male	3	ICSI	NA	5	2.72	23.55	10.7	2	2729	2.4	0.421	11.2	21	0	2017-10-05	2	1	0	1	intrauterine pregnancy		2018-06-05	37	Cesarean	female	3.05	female	2.45
598	2017-10-18 09:50	0	31	GnRH-agonist long protocol	19.14	primary	Tubal	5	IVF	NA	7.78	8.21	60.84	15.12	2	2736	2.15	0.641	16.6	11	0	2017-10-23	1	1	0	1	intrauterine pregnancy	yes	- -
599	2017-10-26 10:25	0	34	GnRH-agonist long protocol	19.38	secondary	Tubal	0	IVF	NA	3.42	4.76	64.68	25.38	3	3246	3.05	0.503	NA	18	0	2017-10-31	1	1	0	1	intrauterine pregnancy	yes	- -
600	2017-10-27 09:00	0	33	GnRH-agonist long protocol	20.96	primary	male	2	IVF	7.485	5.61	8.34	46.58	14.34	2	2572	1.66	0.726	12.2	14	0	2017-11-01	1	1	0	0			- -
601	2017-10-31 09:35	0	35	GnRH-agonist long protocol	19.83	primary	Tubal	1	IVF	10.243	9.82	7.86	44.15	17.98	2	2772	2.27	1.12	10	12	2	2017-11-05	1	1	0	0			- -
602	2017-11-10 09:25	1	30	GnRH-agonist long protocol	19.56	secondary	male	3	ICSI	NA	6.47	3	41.41	18.21	3	3005	2.08	0.535	13.3	20	2	2017-11-15	1	1	0	1	intrauterine pregnancy		2018-07-22	38	Cesarean	male	3.68
603	2017-11-15 09:25	0	27	GnRH-agonist long protocol	18.73	primary	Tubal	1	IVF	7.135	7.3	2.08	5	14.97	3	3588	1.41	0.751	14.5	15	0	2017-11-20	1	1	0	1	intrauterine pregnancy	yes	- -
604	2017-11-16 09:55	2	36	GnRH-agonist long protocol	22.04	secondary	male	2	ICSI	NA	8.92	5	29.77	18.25	3	3004	2.23	0.504	12.6	14	2	2017-11-21	1	1	0	1	intrauterine pregnancy	yes	- -
605	2017-11-19 09:50	0	33	GnRH-agonist long protocol	21.48	primary	Tubal	0	IVF	6.608	7.33	3.51	30.99	13.44	4	4070	0.988	0.922	11	11	0	2017-11-24	1	1	0	0			- -
606	2017-11-24 10:35	0	39	GnRH-agonist long protocol	18	secondary	Tubal	1	IVF	3.13	8.27	8.46	36.38	12.01	3	3388	3.36	0.327	8.2	10	2	2017-11-29	1	1	0	1	intrauterine pregnancy		2018-08-16	39	Vaginal	male	3.45
607	2017-11-22 10:00	0	23	GnRH-agonist long protocol	20.03	primary	Tubal	4	IVF	3.07	1.39	2.16	5	15.68	3	3412	1.74	0.764	NA	17	2	2017-11-27	1	1	0	0			- -
608	2017-11-26 10:05	0	35	GnRH-agonist long protocol	19.65	secondary	Endometriosis	13	IVF	4.307	2.3	0.74	5	19.03	4	4744	1.91	0.725	10.9	19	0	2017-12-01	1	1	0	1	intrauterine pregnancy		2018-08-26	36	Cesarean	male	3.05
609	2017-12-08 08:50	0	25	GnRH-agonist long protocol	23.05	secondary	Tubal	2	IVF	2.103	8	4.51	41	14.61	1	1759	3.02	0.57	13	6	0	2017-12-13	1	1	0	0			- -
610	2017-12-08 09:30	1	29	GnRH-agonist long protocol	22.43	primary	Tubal	2	IVF	NA	5.31	3.91	31.73	7.47	2	2098	2.26	0.317	16	12	1	2017-12-13	1	1	0	1	intrauterine pregnancy	yes	- -
611	2017-12-30 09:00	0	22	GnRH-agonist long protocol	19.72	secondary	male	3	IVF	NA	3.27	4.77	58.25	9.17	4	4470	2.01	0.506	11.5	15	1	2018-01-04	1	1	0	0			- -
612	2018-01-07 09:50	0	36	GnRH-agonist long protocol	19.23	secondary	Tubal	3	IVF	6.641	6.47	4.28	29.57	16.2	3	3406	0.977	0.535	12.3	12	1	2018-01-12	1	1	0	1	intrauterine pregnancy		2018-09-17	39	Cesarean	male	3.4
613	2018-01-10 08:45	0	28	GnRH-agonist long protocol	19.53	primary	Tubal	1	IVF	3.685	8.32	3.42	25.26	10.6	2	2551	3.29	0.498	10.9	8	2	2018-01-15	1	1	0	1	intrauterine pregnancy		2018-09-14	38	Cesarean	male	2.85
614	2018-03-28 08:50	0	29	GnRH-agonist long protocol	19.63	secondary	male	4	ICSI	4.191	7.18	4.77	31.89	18.14	1	1166	0.53	0.93	10.2	15	2	2018-04-02	1	1	0	1	intrauterine pregnancy		2018-12-13	39	Vaginal	male	3.3
615	2018-03-28 10:00	1	29	GnRH-agonist long protocol	21.48	primary	Mixed	3	IVF	NA	6.48	6.74	7.89	14.97	2	2879	2.16	0.871	16.1	15	2	2018-04-02	1	1	0	1	intrauterine pregnancy	yes	- -
616	2018-04-02 09:25	0	33	GnRH-agonist long protocol	22.03	primary	Mixed	4	IVF	5.667	6.89	5.02	39.44	12.28	4	4438	1.89	0.649	14	20	2	2018-04-07	1	1	1	0
617	2018-04-03 09:00	0	28	GnRH-agonist long protocol	22.89	primary	male	2	ICSI	1.846	6.13	6.06	23.96	16.52	3	3892	2.23	1.13	12.5	17	2	2018-04-08	1	1	0	1	intrauterine pregnancy		2018-11-28	35	Vaginal	male	2.5
618	2018-04-08 09:53	0	35	GnRH-agonist long protocol	20.96	secondary	Mixed	3	IVF	2.29	6.28	4.84	36.81	10.19	2	2572	1.66	0.589	9.3	12	0	2018-04-13	1	1	0	0			- -
619	2018-04-21 10:35	0	33	GnRH-agonist long protocol	25.39	secondary	male	5	ICSI	1.688	7.34	3.91	33.43	19.43	2	2204	1.25	0.528	10.3	7	1	2018-04-26	1	1	0	1	intrauterine pregnancy		2019-01-12	40	Vaginal			female	3.5
620	2018-04-27 09:30	0	25	GnRH-agonist long protocol	20.8	primary	male	2	ICSI	8.111	3.35	6.78	NA	10.95	3	3498	1.36	0.501	13.3	20	2	2018-05-02	2	1	0	0			- -
621	2018-04-30 10:45	0	37	GnRH-agonist long protocol	18.31	secondary	Tubal	2	IVF	2.455	7.66	3.75	20.99	15.31	3	3832	2.98	0.647	12.5	12	2	2018-05-05	1	1	0	1	intrauterine pregnancy		2019-01-13	38	Vaginal			female	3
622	2018-05-06 09:00	1	31	GnRH-agonist long protocol	20.03	secondary	male	1	ICSI	NA	2.88	1.92	7.88	18.07	3	3026	1.28	0.685	9.6	15	2	2018-05-11	1	1	0	1	intrauterine pregnancy		2019-01-26	39	Vaginal			female	3.68
623	2018-05-07 09:20	0	30	GnRH-agonist long protocol	22.66	primary	Ovulatory	7	IVF	10.316	9.26	1.16	40.15	11.69	2	2033	1.56	0.087	13	13	2	2018-05-12	2	1	0	1	intrauterine pregnancy		2019-01-10	37	Cesarean	male	2.5	male	2.45
624	2018-05-11 08:40	1	43	GnRH-agonist long protocol	27.34	secondary	Tubal	2	IVF	3.653	5.52	3.64	25.07	13.86	3	3108	3.06	0.604	11	13	0	2018-05-16	1	1	0	0			- -
625	2018-05-30 09:43	0	33	GnRH-agonist long protocol	20.31	secondary	Tubal	2	IVF	1.731	7.11	3.06	33.11	17.32	1	1084	1.66	0.192	12.4	10	2	2018-06-04	1	1	0	1	intrauterine pregnancy		2019-02-25	39	Cesarean			female	3.1
626	2018-05-31 09:20	0	31	GnRH-agonist long protocol	18.78	primary	Endometriosis	2	IVF	2.726	8.38	5.55	38.97	17.28	2	2172	1.77	0.743	11.7	16	2	2018-06-05	1	1	0	1	intrauterine pregnancy		2019-02-25	40	Vaginal			female	3.35
627	2018-06-13 10:16	0	33	GnRH-agonist long protocol	17.8	primary	Unexplained	4	IVF	3.928	9.65	5.17	68.64	13.19	2	2385	3.65	0.248	12.9	8	2	2018-06-18	1	1	0	1	intrauterine pregnancy		2019-03-07	40	Vaginal	male	3.17
628	2018-06-22 09:50	0	30	GnRH-agonist long protocol	18.37	primary	Tubal	4	IVF	1.824	8.35	4.16	36.04	15.64	2	2437	3.16	0.224	14.1	9	2	2018-06-27	1	1	0	1	intrauterine pregnancy		2019-02-28	37	Vaginal			female	2.5
629	2018-07-04 09:43	1	35	GnRH-agonist long protocol	18.44	secondary	Tubal	2	IVF	NA	6.25	6.66	32.76	13.8	3	3990	2.48	0.311	14.4	15	0	2018-07-09	1	1	0	1	intrauterine pregnancy	yes	- -
630	2018-07-19 09:12	0	37	GnRH-agonist long protocol	17.36	primary	Tubal	8	IVF	3.129	8.93	7.86	34.94	17.54	3	3014	2.01	0.274	12.1	15	2	2018-07-24	1	1	0	0			- -
631	2018-07-24 10:10	0	34	GnRH-agonist long protocol	22.66	secondary	male	2	IVF	4.739	7.26	7.41	26.39	10.59	1	1973	1.56	0.393	13.4	8	2	2018-07-29	1	1	0	1	intrauterine pregnancy		2019-04-11	39	Vaginal			female	3.1
632	2018-07-30 08:50	0	31	GnRH-agonist long protocol	17.71	primary	Tubal	7	IVF	3.184	8.06	3.8	53	16.39	3	3392	2.16	0.54	11.1	11	0	2018-08-04	1	1	0	0			- -
633	2018-08-04 09:00	0	34	GnRH-agonist long protocol	21.36	secondary	Tubal	2	IVF	3.19	2.7	7.48	50	16.79	2	2940	1.58	1.14	8.2	8	2	2018-08-09	1	1	0	0			- -
634	2018-08-06 09:10	0	37	GnRH-agonist long protocol	23.15	secondary	Tubal	8	IVF	1.423	1.05	5.76	24.58	14.93	1	1030	0.982	0.342	8.6	8	2	2018-08-11	1	1	0	0			- -
635	2018-08-13 09:13	0	33	GnRH-agonist long protocol	20.2	secondary	male	1	IVF	3.498	3.81	6.75	50.18	14.2	3	3615	2.15	0.69	11	18	2	2018-08-18	1	1	0	1	intrauterine pregnancy		2019-04-28	38	Vaginal	male	3.32
636	2018-08-26 09:50	0	28	GnRH-agonist long protocol	24.65	primary	Tubal	3	IVF	2.569	7.54	6.16	25.99	11.97	1	1446	1.3	0.729	8.6	17	2	2018-08-31	1	1	0	0			- -
637	2018-08-30 09:50	0	28	GnRH-agonist long protocol	20.31	primary	Tubal	4	IVF	3.668	7.14	3.55	13.18	12.77	3	3206	2.09	0.64	11.4	8	1	2018-09-04	1	1	0	1	intrauterine pregnancy	yes	- -
638	2018-08-31 09:35	0	37	GnRH-agonist long protocol	NA	secondary	Tubal	5	IVF	3.634	7.17	7.43	23.15	10.28	3	3552	1.82	0.357	9.9	8	2	2018-09-05	1	1	0	1	intrauterine pregnancy		2019-05-15	38	Cesarean	male	3.0
639	2018-09-05 09:36	0	32	GnRH-agonist long protocol	22.03	secondary	Endometriosis	1	IVF	4.563	6.91	5.82	31.13	16.67	3	3294	4.35	0.868	15.7	11	2	2018-09-10	1	1	1	1	intrauterine pregnancy		2019-05-11	37	Vaginal	male	3.3
640	2018-09-07 10:00	0	33	GnRH-agonist long protocol	22.58	primary	Tubal	1	IVF	1.414	7.15	4.12	35.41	12.93	2	2021	1.63	0.992	9.4	7	2	2018-09-12	2	2	0	1	intrauterine pregnancy		2019-06-06	40	Cesarean			female	3.75
641	2018-09-08 09:30	0	28	GnRH-agonist long protocol	19.83	primary	Ovulatory	2	IVF	2.33	6.45	3.4	42.03	9.05	3	3274	1.22	0.705	12.2	9	2	2018-09-13	2	2	0	1	intrauterine pregnancy		2019-05-10	37	Cesarean	male	2.4	male	2.2
642	2018-09-16 10:23	0	36	GnRH-agonist long protocol	19.2	secondary	Unexplained	10	IVF	5.295	8.25	6.27	34.38	11.5	2	2875	3.16	0.678	12.4	11	2	2018-09-21	1	1	0	0			- -
643	2018-09-18 09:25	0	39	GnRH-agonist long protocol	21.26	secondary	Endometriosis	0	IVF	2.84	6.21	4.86	41	12.54	2	2324	0.532	0.499	14.9	23	2	2018-09-23	1	1	0	1	intrauterine pregnancy		2019-06-10	40	Cesarean			female	4.19
644	2018-09-19 09:35	0	40	GnRH-agonist long protocol	20.96	secondary	Tubal	1	IVF	3.176	7.48	8.16	47.39	25.6	1	1421	1.49	0.57	11.5	7	1	2018-09-24	1	1	0	0			- -
645	2018-09-21 11:05	0	29	GnRH-agonist long protocol	19.23	secondary	Tubal	3	IVF	2.28	3.18	2.25	6.31	15.99	1	1679	1.91	0.827	10.7	9	2	2018-09-26	1	1	0	0			- -
646	2018-09-21 11:20	0	29	GnRH-agonist long protocol	20.31	secondary	Tubal	1	IVF	3.602	7.06	7.82	45.97	10.69	2	2986	4.26	0.557	9	11	2	2018-09-26	1	1	1	1	intrauterine pregnancy		2019-05-24	36	Vaginal	male	2.7
647	2018-09-23 10:32	0	38	GnRH-agonist long protocol	20.55	secondary	male	3	IVF	2.46	4.8	3.59	56.88	15.8	2	2606	1.86	0.553	15	12	2	2018-09-28	1	1	0	0			- -
648	2018-09-24 09:35	0	29	GnRH-agonist long protocol	22.21	secondary	male	3	ICSI	1.938	9.28	5.08	33.75	9.81	2	2324	1.4	0.475	14	8	2	2018-09-29	1	1	0	1	intrauterine pregnancy		2019-06-06	38	Cesarean	male	4.3
649	2018-09-28 08:45	0	28	GnRH-agonist long protocol	27.34	primary	Tubal	3	IVF	1.365	8.23	3.29	26.06	10.4	2	2426	3.06	0.365	13.1	7	2	2018-10-03	1	1	0	0			- -
650	2018-10-04 11:45	0	28	GnRH-agonist long protocol	18.59	primary	male	2	IVF	1.281	7.75	2.97	56.92	11.89	2	2094	0.829	0.889	13.7	9	2	2018-10-09	1	1	0	1	intrauterine pregnancy		2019-06-08	37	Cesarean			female	2.6
651	2018-10-09 09:10	0	36	GnRH-agonist long protocol	24.65	primary	Tubal	8	IVF	NA	6.17	3.6	31.96	13.7	3	3237	1.47	0.671	13	12	2	2018-10-14	1	1	0	1	intrauterine pregnancy	yes	- -
652	2018-10-09 09:40	0	30	GnRH-agonist long protocol	19.56	secondary	Tubal	2	IVF	4.253	1.85	3.81	12.9	12.22	3	3622	1.14	0.512	10.3	7	2	2018-10-14	1	1	0	1	intrauterine pregnancy		2019-06-29	39	Cesarean			female	2.75
653	2018-10-13 09:05	0	38	GnRH-agonist long protocol	24.61	secondary	Tubal	2	IVF	7.316	6.36	4.37	43.21	6.62	2	2158	1.01	0.308	10.9	11	2	2018-10-18	1	1	0	0			- -
654	2018-10-17 09:41	0	31	GnRH-agonist long protocol	20.7	secondary	Tubal	2	IVF	4.893	6.35	4.8	45.48	12.99	3	3675	1.51	0.835	6.6	11	2	2018-10-22	1	1	0	1	intrauterine pregnancy	yes	- -
655	2018-10-17 10:10	0	31	GnRH-agonist long protocol	18.08	primary	Tubal	4	IVF	4.563	5.12	2.58	52.12	13.49	2	2291	0.825	0.457	9.8	11	2	2018-10-22	1	1	0	1	ectopic pregnancy		- -
656	2018-10-18 10:00	0	30	GnRH-agonist long protocol	19.72	secondary	Tubal	1	IVF	2.356	6.88	4.99	54.16	13.65	1	1722	2.76	0.645	11.9	8	1	2018-10-23	1	1	0	0			- -
657	2018-10-25 10:25	1	42	GnRH-agonist long protocol	24.06	secondary	Tubal	2	IVF	3.13	4.01	2.11	37	9.96	2	2190	1.26	0.782	11.1	14	2	2018-10-30	1	1	0	0			- -
658	2018-10-26 08:55	0	33	GnRH-agonist long protocol	18.26	primary	Ovulatory	2	ICSI	2.789	2.06	2.32	40.09	15.44	2	2211	1.74	0.842	13.5	5	1	2018-10-31	1	1	0	0			- -
659	2018-10-26 09:40	0	31	GnRH-agonist long protocol	20.4	primary	male	3	ICSI	2.236	9.5	3.7	31.14	21.49	2	2036	2.71	0.677	12.5	5	1	2018-10-31	1	1	0	1	intrauterine pregnancy		2019-07-12	38	Vaginal	male	3.43
660	2018-11-09 08:50	0	29	GnRH-agonist long protocol	23.23	primary	male	5	IVF	0.992	6.73	3.75	55.04	12.47	2	2169	3.16	0.502	14	8	2	2018-11-14	1	1	0	0			- -
661	2018-11-11 09:55	0	37	GnRH-agonist long protocol	20.43	primary	Tubal	16	IVF	4.13	3.8	4.83	27.24	10.58	3	3784	2.46	0.296	11.3	19	2	2018-11-16	1	1	0	1	intrauterine pregnancy		2019-04-26	26	Vaginal			female	1
662	2018-11-13 09:14	1	33	GnRH-agonist long protocol	20.81	secondary	Tubal	3	IVF	2.372	4.89	6.91	12.71	18.61	2	2161	2.6	0.389	10.6	6	2	2018-11-18	1	1	0	1	intrauterine pregnancy		2019-07-31	39	Cesarean			female	2.5
663	2018-11-18 09:46	0	32	GnRH-agonist long protocol	24.97	primary	male	3	ICSI	3.557	5.38	2.74	25.53	15.22	3	3658	1.76	0.797	12.4	15	2	2018-11-23	1	1	0	0			- -
664	2018-11-25 09:45	0	29	GnRH-agonist long protocol	20.96	primary	Mixed	5	ICSI	3.727	5.8	3.68	36.86	8.21	1	1879	1.39	0.491	8.9	12	2	2018-11-30	1	1	0	1	intrauterine pregnancy		2019-08-09	38	Vaginal			female	3.0
665	2018-11-25 10:25	0	37	GnRH-agonist long protocol	17.09	secondary	male	1	IVF	1.869	7.55	5.8	35.49	17.13	4	4038	1.12	0.991	10.2	13	2	2018-11-30	1	1	0	0			- -
666	2018-11-29 08:50	0	37	GnRH-agonist long protocol	24.77	secondary	Endometriosis	1	IVF	1.788	7.18	4.76	42.75	14.39	3	3650	1.44	0.77	8.6	15	2	2018-12-04	1	1	0	1	intrauterine pregnancy		2019-08-19	39	Cesarean	male	3.7
667	2018-12-01 09:16	0	32	GnRH-agonist long protocol	23.44	secondary	Ovulatory	1	IVF	7.611	6.7	4.21	32.08	12.13	3	3726	2.31	0.571	13.2	19	2	2018-12-06	1	1	1	1	intrauterine pregnancy		2019-08-24	40	Vaginal	male	3.5
668	2018-12-02 09:30	0	33	GnRH-agonist long protocol	19.98	secondary	Endometriosis	1	IVF	2.14	2.06	7.58	51	12.06	2	2667	2.52	0.161	14.1	9	2	2018-12-07	1	1	0	1	intrauterine pregnancy		2019-08-24	39	Vaginal			female	3.2
669	2018-12-04 09:50	0	33	GnRH-agonist long protocol	19.84	primary	male	3	IVF	3.156	3.44	6.2	44.38	17.3	3	3010	1.66	1.2	11	15	2	2018-12-09	1	1	0	1	intrauterine pregnancy		2019-08-29	40	Cesarean	male	3.6
670	2018-12-06 09:20	0	34	GnRH-agonist long protocol	20.4	secondary	Tubal	1	IVF	1.86	9.09	4.3	39.62	16.69	2	2678	1.46	0.295	12.7	7	0	2018-12-11	1	1	0	0			- -
671	2018-12-16 09:20	0	32	GnRH-agonist long protocol	18.36	primary	male	2	IVF	3.58	6.9	5.27	62.94	14.79	4	4704	1.91	0.683	12.6	13	1	2018-12-21	1	0	0	1	intrauterine pregnancy		2019-08-23	37	Cesarean	male	3.24
672	2018-12-17 09:26	0	27	GnRH-agonist long protocol	19.53	secondary	male	4	IVF	4.72	4.79	3.05	27.44	11.57	4	4664	1.41	0.521	10.7	13	2	2018-12-22	1	1	0	0
673	2018-12-17 10:10	0	33	GnRH-agonist long protocol	NA	secondary	Tubal	1	IVF	3.519	1.62	2.85	8.87	12.79	1	1540	2.85	0.334	10.7	11	1	2018-12-22	1	1	0	1	intrauterine pregnancy		2019-09-05	39	Cesarean	male	3
674	2018-12-18 09:00	0	34	GnRH-agonist long protocol	24.97	secondary	Tubal	0	IVF	4.9	5.88	3.22	33	11.51	1	223	2.3	0.453	9.2	9	2	2018-12-23	1	1	0	1	intrauterine pregnancy		2019-09-06	39	Cesarean			female	3.7
675	2018-12-22 10:10	0	30	GnRH-agonist long protocol	19.05	primary	Endometriosis	3	IVF	2.007	5.71	3.37	33.81	17.18	1	1386	2.65	0.493	8.9	7	2	2018-12-27	1	1	0	0			- -
676	2018-12-23 11:00	0	32	GnRH-agonist long protocol	23.73	secondary	male	3	IVF	2.419	4.89	2.63	7.67	15.29	4	4307	1.75	0.465	11.8	11	1	2018-12-28	1	1	0	1	intrauterine pregnancy		2019-09-11	39	Cesarean	male	2.9
677	2018-12-28 10:25	0	28	GnRH-agonist long protocol	18.9	primary	male	4	ICSI	1.7	7.22	5.02	27.79	21.26	2	2177	2.09	0.667	10.3	10	2	2019-01-02	1	1	0	0			- -
678	2019-01-03 09:10	0	35	GnRH-agonist long protocol	22.43	primary	male	3	IVF	2.33	5.92	4.96	13.72	11.3	1	1603	1.89	0.469	10.4	13	2	2019-01-08	1	1	0	1	intrauterine pregnancy		2019-09-19	39	Cesarean			female	3.2
679	2019-01-03 10:03	0	38	GnRH-agonist long protocol	22.6	primary	Tubal	1	IVF	7.486	1.68	1.56	50.9	16.03	4	4499	1.53	0.919	11	20	2	2019-01-08	2	2	0	0			- -
680	2019-01-04 10:45	0	30	GnRH-agonist long protocol	20.81	primary	Tubal	1	IVF	3.6	9	3.31	46	14.4	3	3845	2.23	0.683	11.2	20	2	2019-01-09	1	1	1	1	intrauterine pregnancy		2019-10-03	39	Vaginal			female	3.2
681	2019-01-05 09:30	2	31	GnRH-agonist long protocol	20.31	primary	male	6	ICSI	1.953	5.55	4.73	22	13.85	1	1451	1.34	0.297	9.9	11	1	2019-01-10	1	1	0	1	intrauterine pregnancy		2019-10-02	40	Cesarean	male	3.8
682	2019-01-06 09:35	0	28	GnRH-agonist long protocol	23.83	primary	male	6	ICSI	NA	5.92	3.41	36.81	14.56	2	2639	1.69	0.453	12	16	2	2019-01-11	1	1	0	1	intrauterine pregnancy	yes	- -
683	2019-01-08 09:15	2	29	GnRH-agonist long protocol	40.79	primary	Endometriosis	7	IVF	2.938	6.59	5.7	39.84	22.35	4	4071	1.85	0.986	8.5	11	0	2019-01-13	1	1	0	0			- -
684	2019-01-09 09:55	0	37	GnRH-agonist long protocol	30.04	secondary	Tubal	2	IVF	4.149	5.6	3.8	48.2	13.55	3	3110	1.27	0.587	11.1	19	2	2019-01-14	1	1	0	0			- -
685	2019-01-10 09:50	0	37	GnRH-agonist long protocol	18.82	secondary	Tubal	4	IVF	3.6	4.77	7.09	59.74	14.81	3	3634	2.1	0.582	9	14	2	2019-01-15	1	1	0	0			- -
686	2019-01-17 09:10	0	32	GnRH-agonist long protocol	19.22	secondary	Endometriosis	1	IVF	2.131	2.86	6.31	34.03	11.87	1	1640	1.95	0.195	15.5	6	0	2019-01-22	1	1	0	0			- -
687	2019-01-18 08:30	0	33	GnRH-agonist long protocol	22.58	secondary	male	9	IVF	1.815	5.63	6.06	28.14	13.1	2	2310	1.45	0.986	15.9	16	1	2019-01-23	1	1	0	0			- -
688	2019-01-18 08:40	0	35	GnRH-agonist long protocol	27.34	secondary	Tubal	5	IVF	2.253	5.68	2.98	33.51	15.77	1	1757	1.17	0.423	11.1	13	2	2019-01-23	1	1	0	1	intrauterine pregnancy	yes	- -
689	2019-01-19 10:25	0	28	GnRH-agonist long protocol	16.73	primary	male	2	IVF	2.13	6.15	4.24	40.6	13.41	2	2135	2.65	0.277	14.3	18	0	2019-01-24	1	1	0	0			- -
690	2019-01-20 09:30	0	39	GnRH-agonist long protocol	20.2	secondary	Tubal	6	IVF	1.473	6.49	6.26	76.11	15.83	2	2106	2.46	0.392	13.9	12	1	2019-01-25	1	1	0	0			- -
691	2019-01-23 09:50	0	34	GnRH-agonist long protocol	25.63	secondary	Tubal	2	IVF	3.202	5.6	4.92	25.24	11.24	1	1904	1.68	0.479	13.2	12	1	2019-01-28	1	1	0	1	intrauterine pregnancy		2019-10-19	36	Cesarean	male	3.1
692	2019-01-26 09:00	0	26	GnRH-agonist long protocol	21.93	primary	male	0	ICSI	5.328	7.19	3.8	5.45	14.97	3	3900	1.42	1.04	11.9	15	1	2019-01-31	1	1	0	0			- -
693	2019-02-27 09:30	0	30	GnRH-agonist long protocol	23.42	primary	male	5	ICSI	8.089	6.03	3.2	36.96	NA	2	2340	1.7	0.224	15.8	15	2	2019-03-04	1	1	0	1	intrauterine pregnancy		2019-11-09	38	Cesarean	male	3.2
694	2019-03-06 09:40	0	28	GnRH-agonist long protocol	20.83	secondary	Unexplained	3	IVF	4.759	5.6	5.02	38	11.23	3	3818	1.33	0.567	9.8	18	2	2019-03-11	1	1	0	1	intrauterine pregnancy		2019-11-18	38	Cesarean			female	3.7
695	2019-03-11 09:25	0	31	GnRH-agonist long protocol	23.71	secondary	Tubal	1	IVF	5.25	6.22	3.13	38.8	15.22	3	3301	1.1	0.93	12.9	14	2	2019-03-16	1	1	0	0			- -
696	2019-03-12 09:15	0	30	GnRH-agonist long protocol	19.83	secondary	Tubal	1	IVF	4.316	7.25	7.12	54.04	8.78	4	4408	2.37	0.679	12	22	0	2019-03-17	1	1	0	1	intrauterine pregnancy		2019-12-09	41	Vaginal	male	3.4
697	2019-03-13 09:25	0	38	GnRH-agonist long protocol	24.03	secondary	Tubal	4	IVF	2.81	6.22	4.59	37.75	16.04	3	3475	1.92	0.879	14.2	14	2	2019-03-18	1	1	0	1	intrauterine pregnancy		2019-12-04	39	Cesarean			female	2.84
698	2019-03-14 09:45	0	40	GnRH-agonist long protocol	20.58	primary	Tubal	2	IVF	2.38	2.99	2.67	5	14.23	1	1706	1.8	0.487	9.9	9	2	2019-03-19	1	1	0	1	intrauterine pregnancy		2019-11-10	36	Vaginal			female	3.45
699	2019-03-25 09:30	0	32	GnRH-agonist long protocol	18.9	secondary	Tubal	1	IVF	3.21	6.47	3.94	49.37	23.3	3	3561	1.29	0.9	10.6	16	2	2019-03-30	1	1	0	0			- -
700	2019-03-25 09:45	0	34	GnRH-agonist long protocol	19.53	secondary	male	2	IVF	6.516	0.92	2.77	5.13	12.38	2	2575	1.02	0.898	6.8	14	2	2019-03-30	1	1	0	0			- -
701	2019-03-28 09:08	0	38	GnRH-agonist long protocol	22.03	secondary	Unexplained	9	IVF	1.377	7.84	3.49	33.2	7.51	2	2374	2.17	0.302	14	12	2	2019-04-02	1	1	0	0			- -
702	2019-03-31 09:10	0	40	GnRH-agonist long protocol	21.09	secondary	Ovulatory	1	IVF	2.217	6.55	5.29	44.27	15.9	3	3573	2.2	0.509	8.9	14	2	2019-04-05	1	1	0	1	intrauterine pregnancy		2019-12-06	37	Cesarean	male	2.85
703	2019-04-03 09:40	0	38	GnRH-agonist long protocol	18.49	secondary	Tubal	8	IVF	3.255	7	6.22	24.57	19.37	4	4104	3.87	0.944	15.3	15	2	2019-04-08	1	1	0	0			- -
704	2019-04-06 10:25	0	24	GnRH-agonist long protocol	20.03	secondary	Tubal	1	IVF	4.998	8.19	7.34	32.38	16.06	3	3600	2.8	0.703	12	12	2	2019-04-11	1	1	0	1	intrauterine pregnancy		2019-12-07	37	Vaginal	male	2.95
705	2019-04-11 09:10	1	36	GnRH-agonist long protocol	24.61	secondary	Tubal	10	IVF	3.36	7.95	8.5	50.77	9.74	3	3334	1.24	0.682	9.8	17	2	2019-04-16	1	1	0	0			- -
706	2019-04-13 09:06	0	30	GnRH-agonist long protocol	21.64	secondary	Tubal	3	IVF	NA	8.575	5.044	51.557	NA	1	1886	1.62	0.496	12	7	2	2019-04-18	1	1	0	0			- -
707	2019-04-15 08:36	0	35	GnRH-agonist long protocol	17.65	primary	male	5	IVF	5.13	8.39	6.81	26.35	19.24	3	3627	2.22	1.16	11	17	2	2019-04-20	1	1	0	1	intrauterine pregnancy		2020-01-02	39	Vaginal			female	2.75
708	2019-04-18 09:40	0	28	GnRH-agonist long protocol	24.44	primary	Unexplained	4	IVF	2.909	4.97	3.47	27.71	11.34	2	2111	2.32	0.388	12.9	13	2	2019-04-23	1	1	0	1	intrauterine pregnancy	yes	- -
709	2019-04-19 10:10	0	33	GnRH-agonist long protocol	19.63	primary	Endometriosis	2	IVF	2.717	7.01	4.27	32.62	12.63	2	2805	3.97	0.64	9.3	11	2	2019-04-24	1	1	0	0			- -
710	2019-04-21 10:26	0	27	GnRH-agonist long protocol	19.81	secondary	Tubal	6	IVF	2.652	6.32	3.97	73.08	18.75	4	4055	1.33	0.768	8.6	17	2	2019-04-26	1	1	0	0
711	2019-04-27 10:10	0	30	GnRH-agonist long protocol	21.23	primary	Ovulatory	2	IVF	2.622	4.81	3.09	18.85	7.55	4	4199	2.46	0.326	12.2	18	2	2019-05-02	1	1	0	1	intrauterine pregnancy		2020-01-14	39	Cesarean	male	3.8
712	2019-04-29 10:00	1	24	GnRH-agonist long protocol	19.95	primary	male	2	ICSI	3.392	6.69	7.6	45	18.78	3	3249	2.36	0.622	13.1	17	2	2019-05-04	1	1	0	1	intrauterine pregnancy		2020-01-23	40	Vaginal			female	3.2
713	2019-05-08 09:50	0	31	GnRH-agonist long protocol	17.22	primary	Tubal	2	IVF	2.105	8.42	7.11	30.83	17.05	2	2137	1.59	0.371	13.1	13	1	2019-05-13	1	1	0	0			- -
714	2019-05-09 09:20	0	29	GnRH-agonist long protocol	18.36	primary	Tubal	3	IVF	4.26	6.03	3.69	5	26.11	2	2419	2.05	1.06	9.6	9	2	2019-05-14	1	1	0	1	intrauterine pregnancy		2020-01-17	37	Cesarean	male	2.9
715	2019-05-10 09:30	0	31	GnRH-agonist long protocol	24.61	secondary	male	4	ICSI	2.693	7.14	4.99	31.97	10.25	1	1867	3.38	0.208	12.7	12	2	2019-05-15	1	1	0	1	intrauterine pregnancy	yes	- -
716	2019-05-11 09:16	0	29	GnRH-agonist long protocol	NA	primary	Tubal	0	IVF	1.239	5.38	3.18	33.1	17.54	3	3713	1.46	0.682	12.7	6	1	2019-05-16	1	1	0	1	intrauterine pregnancy		2020-01-30	39	Cesarean	male	3.5
717	2019-05-11 09:26	0	28	GnRH-agonist long protocol	22.22	primary	Tubal	4	IVF	1.65	5.78	4.91	24.94	15.79	2	2410	2	0.797	10.6	8	1	2019-05-16	1	1	0	1	intrauterine pregnancy		2020-01-22	38	Cesarean	male	2.6
718	2019-05-14 09:35	0	30	GnRH-agonist long protocol	27.59	secondary	Tubal	7	IVF	3.463	7.45	4.8	19.95	9.52	1	1130	1.78	0.416	13.3	7	1	2019-05-19	1	1	0	0			- -
719	2019-05-15 10:08	0	37	GnRH-agonist long protocol	19.57	secondary	Tubal	2	IVF	2.404	9.23	6.75	49.46	9.93	2	2380	6.99	0.476	13.5	10	0	2019-05-20	1	1	0	1	intrauterine pregnancy		2020-01-28	38	Cesarean	male	3.7
720	2019-05-25 10:00	1	37	GnRH-agonist long protocol	24.12	secondary	male	4	IVF	1.279	9.68	3.52	49.37	12.58	2	2941	1.25	0.781	13.9	7	2	2019-05-30	1	1	0	0			- -
721	2019-05-31 09:00	0	42	GnRH-agonist long protocol	24.65	secondary	Tubal	8	IVF	2.248	8.78	3.3	22.58	19.29	1	1254	2.67	0.355	7.5	4	0	2019-06-05	1	1	0	0			- -
722	2019-06-03 10:26	0	26	GnRH-agonist long protocol	20.5	primary	male	1	ICSI	1.451	9	7.46	31.14	29.19	2	2933	1.82	0.868	10.2	9	1	2019-06-08	1	1	0	0			- -
723	2019-06-04 10:00	0	39	GnRH-agonist long protocol	24.91	secondary	Unexplained	2	IVF	3.233	6.58	4.45	36.4	17.77	2	2842	1.47	0.935	10	17	2	2019-06-09	1	1	0	0			- -
724	2019-06-05 09:30	0	37	GnRH-agonist long protocol	19.53	secondary	Tubal	1	IVF	1.701	9.38	7.79	18.08	15.34	2	2221	2.2	0.624	9.3	6	1	2019-06-10	1	1	0	0			- -
725	2019-06-09 08:30	0	42	GnRH-agonist long protocol	25.71	secondary	Ovulatory	3	IVF	2.414	9.17	6.28	15.11	10.64	1	1332	3.89	0.441	8.6	6	1	2019-06-14	1	1	0	0			- -
726	2019-06-11 09:35	0	35	GnRH-agonist long protocol	20.83	secondary	Tubal	5	IVF	4.255	6.63	3.27	39.22	19.56	3	3172	1.67	1.25	11.2	8	1	2019-06-16	1	1	0	0			- -
727	2019-06-11 10:45	0	30	GnRH-agonist long protocol	16.97	secondary	Tubal	1	IVF	3.46	6.6	5.21	16.66	10.96	2	2226	2.45	0.46	8.8	14	2	2019-06-16	1	1	0	0			- -
728	2019-06-14 10:20	0	34	GnRH-agonist long protocol	23.11	secondary	Tubal	4	IVF	2.66	4.6	6.37	19.04	13.03	4	4625	1.82	1.15	9	18	1	2019-06-19	1	1	0	0			- -
729	2019-06-29 09:20	0	33	GnRH-agonist long protocol	18.73	secondary	Tubal	1	IVF	3.282	6.84	7.06	22.5	15.94	2	2473	1.78	0.796	8.4	11	2	2019-07-04	1	1	0	0			- -
730	2019-07-05 09:30	0	32	GnRH-agonist long protocol	22.55	primary	Tubal	3	IVF	2.39	5.55	8.01	38.9	11.02	3	3721	1.11	0.853	13.6	16	2	2019-07-10	1	1	0	0			- -
731	2019-07-18 09:05	0	28	GnRH-agonist long protocol	20.81	primary	Tubal	1	IVF	3.344	5.16	4.88	42.39	8.76	2	2760	1.48	0.979	10.1	13	2	2019-07-23	1	1	0	0			- -
732	2019-07-29 10:46	0	38	GnRH-agonist long protocol	27.77	primary	Endometriosis	8	IVF	2.86	8.11	6.22	11.77	11.2	3	3403	1.68	0.745	15.2	8	1	2019-08-03	1	1	0	1	intrauterine pregnancy	yes	- -
733	2019-08-02 09:36	0	31	GnRH-agonist long protocol	20.83	primary	Endometriosis	3	IVF	1.577	7.51	4.35	52.81	11.05	3	3519	1.87	0.903	10	17	1	2019-08-07	1	1	0	0			- -
734	2019-08-06 09:50	0	24	GnRH-agonist long protocol	23.05	secondary	Tubal	1	IVF	3.349	6.33	6.68	30.44	17.6	2	2242	1.88	1.13	12.2	15	2	2019-08-11	1	1	1	1	intrauterine pregnancy		2020-04-22	39	Vaginal	male	3.25
735	2019-08-07 09:10	0	34	GnRH-agonist long protocol	23.9	primary	Tubal	4	IVF	2.944	5.16	3.89	44.19	13.9	4	4146	1.7	1.2	9.2	8	1	2019-08-12	1	1	0	0
736	2019-08-09 10:10	1	35	GnRH-agonist long protocol	19.14	secondary	Tubal	3	IVF	3.167	4.88	4.66	57.25	15.09	2	2509	1.98	0.612	6.5	7	0	2019-08-14	1	1	0	1	intrauterine pregnancy	yes	- -
737	2019-08-11 09:20	0	41	GnRH-agonist long protocol	24.97	secondary	Ovulatory	3	IVF	0.823	7.06	6.83	26.93	17.83	1	1720	2.75	0.401	10.7	11	2	2019-08-16	1	1	0	0			- -
738	2019-08-16 09:15	0	32	GnRH-agonist long protocol	18.63	primary	Mixed	5	ICSI	2.55	4.65	2.48	26.59	19.93	3	3858	3.01	1.14	13.3	14	2	2019-08-21	1	1	0	0			- -
739	2019-08-16 09:45	0	38	GnRH-agonist long protocol	20.08	secondary	Tubal	1	IVF	1.821	8.4	4.66	40.36	14.15	3	3770	2.14	0.568	12	18	2	2019-08-21	1	1	1	1	intrauterine pregnancy		2020-04-28	39	Cesarean			female	3.65
740	2019-08-18 10:50	0	39	GnRH-agonist long protocol	22.52	secondary	Unexplained	1	IVF	5.349	7.43	5.25	38.68	15.12	3	3300	2.15	1.05	6.6	10	2	2019-08-23	1	1	0	0			- -
741	2019-08-19 11:10	0	40	GnRH-agonist long protocol	24.44	secondary	Ovulatory	5	IVF	1.869	6.26	3.21	67.5	16.56	2	2392	2.79	0.76	8.3	10	2	2019-08-24	1	1	0	1	intrauterine pregnancy		2020-04-23	37	Cesarean			female	2.5
742	2019-08-21 09:05	2	44	GnRH-agonist long protocol	33.59	secondary	Tubal	1	IVF	NA	6.61	5.73	15.22	20.03	1	865.8	2.123	0.618	8.5	3	0	2019-08-26	1	0	0	1	intrauterine pregnancy	yes	- -
743	2019-08-30 09:45	1	38	GnRH-agonist long protocol	21.36	primary	Tubal	11	IVF	0.908	5.67	6.71	9.06	22.55	1	1063	5.63	0.577	8.9	4	0	2019-09-04	1	1	0	1	intrauterine pregnancy		2020-04-24	36	Cesarean	male	1.5	male	1.7
744	2019-09-06 09:15	0	41	GnRH-agonist long protocol	28.28	secondary	Tubal	6	IVF	2.51	5.99	5.69	50.79	14.01	3	3952	1.13	0.659	11	15	2	2019-09-11	1	1	0	1	intrauterine pregnancy		2020-05-06	37	Cesarean	male	2.8
745	2019-09-13 10:00	0	28	GnRH-agonist long protocol	19.92	primary	Tubal	5	IVF	3.18	6.15	3.71	33.24	14.6	3	3723	9	0.682	12.5	14	2	2019-09-18	1	1	0	1	intrauterine pregnancy		2020-06-11	40	Cesarean	male	3.95
746	2019-09-14 10:00	0	32	GnRH-agonist long protocol	25.04	secondary	Tubal	4	IVF	2.083	6.58	6.61	39.94	14.05	3	3190	2.82	0.676	8.3	13	2	2019-09-19	1	1	0	0			- -
747	2019-09-17 09:40	0	39	GnRH-agonist long protocol	22.68	secondary	Endometriosis	3	IVF	3.8	5.46	2.57	75	20.12	2	2839	1.19	0.715	12.8	12	2	2019-09-22	1	1	0	1	intrauterine pregnancy		2020-05-24	37	Vaginal	male	2.98
748	2019-09-19 09:25	0	30	GnRH-agonist long protocol	21.48	secondary	Tubal	3	IVF	3.05	6.25	6.03	28.16	17.73	3	3891	1.99	0.718	10.9	15	2	2019-09-24	1	1	0	0			- -
749	2019-09-19 09:55	0	33	GnRH-agonist long protocol	31.05	primary	Tubal	3	IVF	1.81	6.16	1.99	62	8.8	3	3122	2.48	0.757	14	14	2	2019-09-24	1	1	0	0			- -
750	2019-10-04 08:55	0	30	GnRH-agonist long protocol	23.92	primary	male	8	ICSI	NA	4.67	4.52	75	10.77	3	3574	2.46	0.998	13.3	6	1	2019-10-09	1	1	0	0			- -
751	2019-10-04 10:15	0	30	GnRH-agonist long protocol	24.65	primary	male	1	ICSI	2.869	7.08	3.68	37.56	15.13	3	3123	1.96	0.752	11.4	11	1	2019-10-09	1	1	0	1	intrauterine pregnancy		2020-06-22	39	Vaginal			female	2.9
752	2019-10-07 09:45	0	33	GnRH-agonist long protocol	19.84	secondary	Tubal	2	IVF	3.265	8.84	4.51	27.28	13.82	2	2601	1.57	0.665	16.3	10	2	2019-10-12	1	1	1	1	intrauterine pregnancy		2020-07-02	40	Vaginal	male	3.4
753	2019-10-08 08:56	1	27	GnRH-agonist long protocol	24.24	secondary	Unexplained	4	IVF	3.63	1.49	3.39	17.94	17	2	2129	1.6	0.979	11.6	17	2	2019-10-13	1	1	0	0			- -
754	2019-10-16 10:10	0	35	GnRH-agonist long protocol	20.32	primary	Unexplained	1	IVF	3.635	6.24	2.01	49.2	10.99	2	2032	1.72	0.399	11.3	15	2	2019-10-21	1	1	0	0			- -
755	2019-10-19 10:40	0	30	GnRH-agonist long protocol	22.43	primary	Tubal	2	IVF	1.642	7.14	2.81	33.88	13.97	3	3666	1.97	0.901	13.8	13	2	2019-10-24	1	1	0	0			- -
756	2019-10-19 10:55	0	35	GnRH-agonist long protocol	18.61	secondary	Tubal	3	IVF	2.02	5.76	4.35	49.67	25.78	3	3484	1.85	0.937	7	16	2	2019-10-24	1	1	0	0			- -
757	2019-11-22 10:00	0	30	GnRH-agonist long protocol	28.7	secondary	Tubal	5	IVF	1.085	5.58	1.89	35.31	8.93	1	1136	3.64	0.328	8.1	10	0	2019-11-27	1	1	0	0			- -
758	2019-11-25 09:50	0	28	GnRH-agonist long protocol	22.03	secondary	male	1	ICSI	2.109	9.69	6.72	57.7	23.09	3	3325	1.84	1.2	15	10	1	2019-11-30	1	1	0	0			- -
759	2019-12-15 09:15	1	28	GnRH-agonist long protocol	20.28	primary	Mixed	4	IVF	1.882	1.7	1.9	5.88	16.71	2	2391	1.5	1.12	9	10	2	2019-12-20	1	1	0	1	intrauterine pregnancy		2020-09-07	40	Cesarean			female	2.85
760	2019-12-15 10:03	0	26	GnRH-agonist long protocol	20.58	secondary	male	1	ICSI	1.881	7.44	7.73	46.64	10.48	2	2766	2.02	0.691	11	11	2	2019-12-20	1	1	0	1	intrauterine pregnancy	yes	- -
761	2019-12-25 09:26	1	40	GnRH-agonist long protocol	24.46	primary	male	2	ICSI	4.861	6.38	5.72	30.72	14.08	3	3857	1.53	1.3	14.7	17	2	2019-12-30	1	1	0	0			- -
762	2020-01-01 09:26	0	31	GnRH-agonist long protocol	19.22	primary	Endometriosis	1	IVF	3.216	5.09	2.69	19.38	20.31	3	3762	2.49	0.442	10.8	12	0	2020-01-06	1	1	0	1	intrauterine pregnancy		2020-09-04	36	Vaginal			female	2.6
763	2020-01-02 09:00	0	36	GnRH-agonist long protocol	19.72	secondary	Tubal	9	IVF	3.982	7.06	7.32	18.46	18.45	2	2824	0.912	0.888	10.7	15	2	2020-01-07	1	1	0	0			- -
764	2020-01-14 09:15	0	29	GnRH-agonist long protocol	20.45	primary	Tubal	5	IVF	1.633	6.95	2.39	40.69	27.42	3	3057	1.13	0.932	10.8	10	2	2020-01-19	1	1	0	1	intrauterine pregnancy		2020-10-07	40	Vaginal			female	3
765	2020-04-05 08:40	0	31	GnRH-agonist long protocol	25.3	secondary	Tubal	3	IVF	1.611	4.86	2.45	12.64	10.91	2	2896	0.735	1.2	16	15	2	2020-04-10	1	1	0	0			- -
766	2020-06-20 09:20:49	0	27	GnRH-agonist long protocol	24.78	secondary	Endometriosis	7	IVF	3.84	7.64	7.13	40.24	16.45	2	2704	1.73	0.368	12.5	12	9	2020-06-25 10:37:07	1	1	0	1	intrauterine pregnancy	yes
767	2020-05-31 09:25:49	0	35	GnRH-agonist long protocol	15.43	secondary	Unexplained	6	IVF	2.306	6.32	5.26	44.83	19.48	2	2197	1.87	0.666	11.2	14	9	2020-06-05 11:06:55	1	1	0	0
768	2020-06-26 10:15:23	1	28	GnRH-agonist long protocol	21.63	secondary	Tubal	1	IVF	3.14	6.39	5.24	37.53	17.62	1	1937	2.52	0.48	9	15	7	2020-07-01 11:18:02	1	1	0	1	intrauterine pregnancy		2021-03-16	39	Cesarean	female	3.5
769	2020-07-18 09:45:30	0	30	GnRH-agonist long protocol	22.48	secondary	Unexplained	2	IVF	1.2	8.96	5.41	7.42	19.38	1	1951	1.84	0.355	13.1	9	5	2020-07-23 11:26:37	1	1	0	1	intrauterine pregnancy	yes
770	2020-07-24 09:10:09	1	33	GnRH-agonist long protocol	24.97	primary	Tubal	1	IVF	NA	6.11	3.96	28.93	10.64	1	1931	1.66	0.439	7.4	13	7	2020-07-29 10:25:57	1	1	0	1	intrauterine pregnancy		2021-04-02	38	Cesarean	female	3.95	female	3.75
771	2020-08-02 08:35:07	0	30	GnRH-agonist long protocol	20.05	primary	male	4	ICSI	1.3	6.11	5.94	17.25	17.46	2	2604	3.14	1.13	10.4	11	7	2020-08-07 10:54:48	1	1	0	0
772	2020-08-11 09:10:18	0	28	GnRH-agonist long protocol	24.56	primary	Tubal	1	IVF	1.98	9.77	2.92	49.52	14.65	2	2863	1.04	1.34	12	11	2	2020-08-16 11:05:18	1	1	0	0
773	2020-09-05 09:45:20	0	25	GnRH-agonist long protocol	20.7	secondary	Tubal	2	IVF	3.63	7.19	6.61	42.27	14.98	2	2331	2.88	0.529	10.4	11	8	2020-09-10 11:33:27	1	1	0	1	intrauterine pregnancy		2021-06-01	40	Cesarean	female	4.1
774	2020-09-27 08:40:03	1	34	GnRH-agonist long protocol	19.23	secondary	male	2	ICSI	4.19	6.87	7.68	35.57	13.6	2	2399	1.63	0.674	12.3	10	5	2020-10-02 12:20:07	1	1	0	0
775	2020-09-04 09:30:11	0	40	GnRH-agonist long protocol	25.39	secondary	Tubal	1	IVF	2.5	7.13	4.4	53.47	9.29	2	2734	3.31	0.555	12.7	15	7	2020-09-09 11:09:54	1	1	0	0
776	2020-11-22 09:39:06	0	32	GnRH-agonist long protocol	26.56	secondary	Tubal	5	IVF	2.11	2.83	7.67	25.64	14.47	3	3414	1.09	0.724	13.1	10	6	2020-11-27 10:48:07	1	1	0	0
777	2020-10-10 09:00:32	0	28	GnRH-agonist long protocol	19.95	secondary	Unexplained	3	IVF	1.75	6.04	5.74	18.45	13.39	3	3525	1.44	0.748	9.9	12	6	2020-10-15 11:20:15	1	1	0	1	intrauterine pregnancy		2021-06-07	36	Vaginal	male	2.45
778	2020-11-25 09:10:06	0	34	GnRH-agonist long protocol	21.78	primary	Tubal	10	IVF	0.745	1.4	2.45	28.53	15.63	1	1826	1.45	0.34	9.5	9	6	2020-11-30 11:28:45	1	1	0	1	intrauterine pregnancy		2021-08-25	41	Cesarean	male	3.25
779	2020-10-19 10:00:29	0	40	GnRH-agonist long protocol	24.98	secondary	Tubal	2	IVF	1.63	5.2	3.47	52	13.44	3	3307	1.97	0.826	8.4	10	3	2020-10-24 11:15:13	1	1	0	1	intrauterine pregnancy		2021-05-15	31	Vaginal	female	1.55
780	2021-01-12 09:10:37	0	28	GnRH-agonist long protocol	20.43	primary	male	1	ICSI	3.24	5.33	7.45	36.3	12.34	4	4195	2.44	0.466	11.3	15	6	2021-01-17 11:45:45	1	1	0	0
781	2021-01-09 08:46:37	0	36	GnRH-agonist long protocol	19.23	secondary	Tubal	7	IVF	1.6	2.81	2.23	25.42	14.54	2	2220	1.27	0.859	12.5	10	4	2021-01-14 10:26:19	1	1	0	0
782	2020-12-19 09:40:00	0	38	GnRH-agonist long protocol	28.34	secondary	Tubal	7	IVF	2.96	6.29	6.13	21.69	13.64	1	1417	1.14	0.816	13	12	4	2020-12-24 11:16:46	1	1	0	0
783	2021-03-19 08:53:23	0	35	GnRH-agonist long protocol	20.78	secondary	male	2	ICSI	1.23	7.62	9.59	10.9	17.29	2	2161	2.67	0.8	14.3	8	3	2021-03-24 11:50:50	1	1	0	0
784	2021-03-19 09:40:32	0	28	GnRH-agonist long protocol	19.56	secondary	Tubal	1	IVF	2.93	6.1	2.72	32.3	12.17	2	2792	1.37	0.2	11.2	19	13	2021-03-24 11:55:25	1	1	0	1	intrauterine pregnancy		2021-12-07	39	Vaginal	female	3.1
785	2021-03-21 09:50:53	1	34	GnRH-agonist long protocol	24.22	secondary	Tubal	8	ICSI	1.13	2.93	5.83	22.46	11.91	1	1887	1.82	0.44	11.1	15	7	2021-03-26 10:30:47	1	1	0	1	intrauterine pregnancy		2021-12-12	40	Cesarean	female	3.9
786	2021-03-08 10:15:13	0	38	GnRH-agonist long protocol	23.34	secondary	Unexplained	1	IVF	1.47	6.46	1.82	41.1	15.15	1	1819	1.16	0.46	11.2	11	6	2021-03-13 11:00:37	1	1	0	1	intrauterine pregnancy		2021-11-19	38	Cesarean	male	3.3
787	2021-05-04 10:25:53	0	31	GnRH-agonist long protocol	23.42	primary	male	1	ICSI	2.2	2.25	1.06	10	14.78	2	2874.74	0.84	0.35	12.3	15	11	2021-05-09 11:25:08	1	1	0	0
788	2021-05-18 09:05:48	0	28	GnRH-agonist long protocol	17.36	primary	Endometriosis	3	IVF	1.93	8.41	0.78	26	16.96	1	1388.44	0.78	0.86	13.4	9	8	2021-05-23 10:45:39	1	1	0	0
789	2021-07-13 09:05:57	0	31	GnRH-agonist long protocol	17.54	primary	Unexplained	3	IVF	3.37	7.77	2.89	21.4	22.96	3	3205	1.29	0.32	15.1	7	2	2021-07-18 10:30:59	1	0	0	0
790	2021-06-25 08:38:05	0	41	GnRH-agonist long protocol	22.03	secondary	Tubal	2	IVF	2.38	7.18	3.92	37.89	12.89	2	2384.65	1.29	0.23	12.7	15	5	2021-06-30 10:40:56	1	1	0	1	intrauterine pregnancy	yes
791	2021-07-06 09:35:28	0	29	GnRH-agonist long protocol	18.73	primary	male	2	ICSI	1.53	0.96	7.1	34.07	20.49	2	2593	1.27	0.67	12	18	8	2021-07-11 10:50:39	1	1	0	0
792	2021-07-22 09:20:29	0	32	GnRH-agonist long protocol	20.45	primary	Unexplained	2	IVF	1.63	6.4	3.52	47.54	15.35	1	714.67	0.69	0.28	10.6	11	4	2021-07-27 10:00:19	1	1	0	1	intrauterine pregnancy		2022-04-15	40	Vaginal	male	3.7
793	2021-07-02 09:05:55	0	31	GnRH-agonist long protocol	21.45	secondary	Tubal	2	IVF	2.84	7.54	3.66	24.4	13.9	2	2084	1.46	0.48	9.9	18	13	2021-07-07 10:43:14	1	1	0	1	intrauterine pregnancy		2022-04-04	41	Cesarean	male	3.55
794	2021-08-15 09:20:26	0	29	GnRH-agonist long protocol	20.43	secondary	Tubal	1	IVF	1.4	5.73	2.86	38.24	19.46	2	2321.24	0.73	0.7	10.5	16	11	2021-08-20 10:50:53	1	1	0	1	intrauterine pregnancy		2022-04-24	38	Vaginal	female	2.76
795	2021-05-10 08:50:53	0	26	GnRH-agonist long protocol	19.92	secondary	male	2	ICSI	3.16	8	5.34	36.27	10.85	2	2934.72	1.99	0.41	16.7	10	6	2021-05-15 10:35:57	1	1	0	1	intrauterine pregnancy		2022-02-01	40	Vaginal	female	2.86
796	2021-07-11 09:50:40	0	31	GnRH-agonist long protocol	20.03	primary	Mixed	1	ICSI	2.22	5	2.37	21.74	18.15	1	1649.88	1.71	0.39	13.5	5	5	2021-07-16 11:30:29	1	1	0	1	intrauterine pregnancy		2022-03-11	36	Cesarean	male	2.6
797	2021-05-19 09:55:36	1	32	GnRH-agonist long protocol	19.63	secondary	Mixed	10	ICSI	3.78	6.91	2.41	40.68	14	3	3077.61	0.52	0.37	12	12	5	2021-05-24 11:10:52	1	1	0	1	intrauterine pregnancy		2022-02-03	39	Vaginal	male	3.8
798	2021-08-12 09:40:51	0	28	GnRH-agonist long protocol	22.72	primary	Unexplained	2	IVF	0.81	3.78	1.29	NA	18.47	2	2233.44	0.48	0.77	8.7	21	7	2021-08-17 10:20:40	1	1	0	1	intrauterine pregnancy		2022-04-18	37	Cesarean	male	2.75
799	2021-07-27 08:50:20	1	29	GnRH-agonist long protocol	20.96	primary	Endometriosis	4	ICSI	NA	7.95	3.9	8	18.49	3	3566.36	1.1	0.55	10.7	5	4	2021-08-01 11:10:37	1	1	0	0
800	2021-09-28 08:50:51	0	30	GnRH-agonist long protocol	19.92	secondary	Tubal	2	IVF	2.69	8.05	4.38	35.2	15.19	2	2780.13	1.48	0.2	10	15	10	2021-10-03 10:30:40	1	1	0	0
801	2021-09-17 08:45:43	1	39	GnRH-agonist long protocol	19.49	primary	Tubal	1	IVF	1.32	7.16	2.74	10.79	17.3	1	1515.88	1.82	0.54	13.2	3	1	2021-09-22 11:00:33	1	1	0	1	intrauterine pregnancy	yes
802	2021-09-30 09:00:01	0	32	GnRH-agonist long protocol	18.34	primary	Endometriosis	5	IVF	2.94	5.57	3.46	33.28	12.32	3	3915.12	1.73	0.39	12.2	11	7	2021-10-05 11:45:49	1	1	0	1	intrauterine pregnancy			39	Cesarean	female	3.52
803	2021-08-16 09:00:25	0	41	GnRH-agonist long protocol	24.14	secondary	Unexplained	8	IVF	3.47	5.93	2.44	19.68	16.63	1	1664.13	0.51	0.31	11.3	12	6	2021-08-21 11:10:36	1	1	0	0
804	2021-09-01 09:05:59	0	31	GnRH-agonist long protocol	18.1	primary	Tubal	2	IVF	1.23	8.54	3.54	39.94	13.17	4	4309.83	0.95	0.82	8.1	14	9	2021-09-06 11:45:03	1	1	0	1	intrauterine pregnancy		2022-05-20	39	Vaginal	male	2.85
805	2020-09-22 08:40:16	0	31	GnRH-agonist long protocol	19.05	secondary	Tubal	3	IVF	3.65	7.54	4.69	30	15.03	2	2222	1.59	1.03	15.3	9	5	2020-09-27 11:15:31	1	1	0	0
806	2020-11-21 09:05:54	0	25	GnRH-agonist long protocol	17.35	primary	male	4	ICSI	2.55	6.2	2.92	30.25	10.78	3	3013	1.38	1.06	11.3	11	5	2020-11-26 11:10:18	1	1	0	0
807	2021-05-09 09:50:22	0	34	GnRH-agonist long protocol	29.33	secondary	Tubal	3	IVF	4.01	4.03	3.76	28.52	13.33	3	3185.52	1.31	0.97	10.7	17	9	2021-05-14 11:13:12	1	1	0	0
808	2021-05-22 09:50:37	0	35	GnRH-agonist long protocol	19.63	secondary	Tubal	4	IVF	2.24	8.78	2.89	9	17.29	1	1618.85	0.79	0.36	12.7	6	3	2021-05-27 10:10:19	1	1	0	1	intrauterine pregnancy	yes
809	2021-07-01 08:50:22	0	26	GnRH-agonist long protocol	19.47	primary	male	2	ICSI	2.49	4.56	1.92	21.13	20.09	2	2825.28	1.45	0.59	11.6	9	4	2021-07-06 11:10:34	1	1	0	0
810	2021-08-24 08:55:26	0	43	GnRH-agonist long protocol	20.17	secondary	Tubal	2	IVF	1.33	6.4	4.22	13.36	17.93	1	1769.2	2.52	0.31	10.8	8	3	2021-08-29 10:25:35	1	1	0	0
811	2021-08-12 09:25:27	0	34	GnRH-agonist long protocol	23.88	secondary	Tubal	7	IVF	1.86	6.82	4.58	49.55	13.63	1	1174.26	0.53	0.31	11.5	13	5	2021-08-17 10:15:30	1	1	0	1	intrauterine pregnancy		2022-05-05	40	Cesarean	male	3.7
